# Supplementary material for: Identification of Copy Number Variations in Xiang and Kele Pigs
Source: PLoS One. 2016 Feb 3;11(2):e0148565. doi: 10.1371/journal.pone.0148565 (PMC4740446; doi:10.1371/journal.pone.0148565)
Supplement: S1 File — CNVRs detected in the study (Table A). Information of genes in the identified CNVRs (Table B). Gene ontology (GO) analysis of genes in identified CNVRs (Table C). Pathway analysis of genes in identified CNVRs (Table D). Previously reported QTLs overlapping with identified CNVRs (Table E). Comparison between identified CNVRs and those reported in other pig CNVR papers (Table F). Special CNVRs and gene information in this study compare with other studies (Table G). Information of CNVRs in different populations (Table H). Information of genes in the CNVRs of large litter size Xiang pig (Table I). Information of genes in the CNVRs of small litter size Xiang pig (Table J). Information of genes in the CNVRs of Kele pig (Table K). Information and the primers used in qPCR analysis of the 26 CNVRs chosen to be validated (Table L). (XLSX) [file pone.0148565.s001.xlsx]

## Sheet: Table A
Table A. CNVRs detected in the study
CNVR ID	chr	start	end	length	type	Sample ID	indiv
CNVR1	1	28640879	28753934	113055	loss	g1x65	1
CNVR2	1	49439200	49492820	53620	loss	gg1x10	1
CNVR3	1	54752505	54824153	71648	loss	g1x66	1
CNVR4	1	67370311	67458584	88273	loss	g1x66	1
CNVR5	1	75540483	75602201	61718	loss	1x156,1x159	2
CNVR6	1	99692675	100080552	387877	gain	1x133,1X85,1X11,1x116,1x157,1X167,1x159,1x156,1X76,1X90,1X88F1,1X166,1x80,1X110,1X13,1X29,1X79,1X172,1X23,1X12,1X22	21
CNVR7	1	102858476	102917151	58675	loss	1X91,1X146	2
CNVR8	1	192734647	192978414	243767	both	1x161,2P14	2
CNVR9	1	193873995	194258004	384009	loss	1X115,1X113,1x119,1x158	4
CNVR10	1	268547138	268597486	50348	gain	1X139	1
CNVR11	1	275605644	275747658	142014	loss	2P26	1
CNVR12	1	284443528	284486575	43047	gain	1X67,1X106F1	2
CNVR13	1	294821198	294867674	46476	gain	2P15F1	1
CNVR14	1	295241692	295462741	221049	gain	2P02,1X12,1X22,1x24,1x30,1X118,1x119,1X29,1X25,1X145,2P08，1X66，1x98，1X130，2P14，2P10	16
CNVR15	1	296616443	296747604	131161	loss	2P28	1
CNVR16	1	296787813	296854248	66435	gain	2P28，1X120，1X134，1X102，1X135，1X67，1X87F1，2P27，2P24，1X19	10
CNVR17	1	311929352	312829468	900116	both	1X110，1x99，1x164，1X22，1x160，1X10，1X165，1X148，1X91，1x162，1x99，2P14，1x157，1X11，1X39，1X13，1X138，1X19，1x158	19
CNVR18	1	313111618	313480723	369105	both	2P16，2P33，2P14，1x162，1X132，2P08，1x111，1x103，1X102，1x105F1，1X79，2P24，1x156，1X104，1x82，1x81	16
CNVR19	2	13853695	14043003	189308	gain	2P14，2P15F1，2P18	3
CNVR20	2	15202906	15501488	298582	gain	2P32	1
CNVR21	2	21834717	21891536	56819	loss	2P18	1
CNVR22	2	24340490	24536667	196177	loss	1x07，1x08F1，1X115	3
CNVR23	2	25815932	25926589	110657	loss	1X120，1X118，1x119，1X131	4
CNVR24	2	36580946	36661408	80462	loss	1X120，1X118，1x164，1x158，1X173	5
CNVR25	2	38279249	38614109	334860	gain	1X65，1x81	2
CNVR26	2	113417117	113584309	167192	loss	1X87F1，1X136	2
CNVR27	2	125940877	126022431	81554	loss	2P02	1
CNVR28	2	158549163	159250446	701283	gain	2P35，1X83	2
CNVR29	2	160400099	160455016	54917	loss	1X102，1x103	2
CNVR30	3	5713062	5763996	50934	gain	2P33，2P11	2
CNVR31	3	12159746	12206694	46948	loss	1X95	1
CNVR32	3	16913373	16920601	7228	loss	1X66，1x82，1x103，1X13，1X83，1X31	6
CNVR33	3	17349049	17405985	56936	loss	1x82	1
CNVR34	3	51429976	51508856	78880	gain	1X155	1
CNVR35	3	64807120	65138723	331603	loss	1X132	1
CNVR36	3	94216284	94536421	320137	loss	1X155	1
CNVR37	3	129847043	130036775	189732	gain	1X59	1
CNVR38	4	3984843	4022337	37494	loss	1X39，1X19	2
CNVR39	4	5693803	5931042	237239	loss	1x156，1x157，1X76，1X167，1X166，1X102，1X104，1x80，1X84，1X90	10
CNVR40	4	26165289	26267023	101734	loss	1x161，1X90，1X113，1X14，1X95	5
CNVR41	4	27041022	27197523	156501	both	1x161，1X11	2
CNVR42	4	39998067	40125899	127832	loss	2P02	1
CNVR43	5	3813901	3844970	31069	gain	2P19，2P24，2P26，1x30，1X167	5
CNVR44	5	21238084	21339891	101807	gain	1X155	1
CNVR45	5	26724414	26895376	170962	loss	1x140，1X139，1X143，1X141，1X142，2P27	6
CNVR46	5	27258927	27814032	555105	loss	2P15F1，2P01，2P11，2P24，2P19	5
CNVR47	5	39588852	39799087	210235	gain	1X11	1
CNVR48	6	11229081	11401849	172768	loss	1X138	1
CNVR49	6	11649072	11746847	97775	gain	1X23	1
CNVR50	6	13731502	13812780	81278	gain	1x81，1x164，1X85，1x159，1X83，1x08F1，1x162，1X22，1x116，1x133，1X104，1X04F1，1X09F1，1X10，1X138，1X132，1X130，1X165，1x158	19
CNVR51	6	27402328	27581833	179505	loss	1X113	1
CNVR52	7	1532038	1681623	149585	loss	1x116	1
CNVR53	7	7022961	7187201	164240	loss	1X11，2P29	2
CNVR54	7	25215084	26187687	972603	both	1X20，1X169，1X173，2P01，1X11，1X76，1X106F1，2P30，1X13，1X138，1X132，1X170，1X87F1，2P29，2P35	15
CNVR55	7	81790769	82096915	306146	loss	1X12	1
CNVR56	7	108475290	108526629	51339	gain	1X170	1
CNVR57	7	120515238	120550319	35081	gain	2P02	1
CNVR58	7	133427075	133522529	95454	gain	2P32，1x72F2，1X171，1x81	4
CNVR59	7	133594228	133701066	106838	loss	1X39，1X19	2
CNVR60	8	43462399	43878303	415904	gain	1X91，1X146，1X147，1X148，1X149	5
CNVR61	8	114392956	114436979	44023	loss	1X84	1
CNVR62	8	121639240	121712755	73515	gain	1X115	1
CNVR63	8	124128258	124138493	10235	gain	1X134，1x98	2
CNVR64	8	132945670	133158855	213185	loss	1x158，1X106F1，1X65，1x105F1	4
CNVR65	8	142733110	142758274	25164	loss	1x160	1
CNVR66	9	3598721	3721967	123246	gain	1X76，1X131，1X95	3
CNVR67	9	4297475	4336627	39152	gain	1X51	1
CNVR68	9	125100668	125316966	216298	gain	2P08	1
CNVR69	9	148655056	148691522	36466	gain	1X173	1
CNVR70	9	148997109	149000304	3195	gain	1X87F1	1
CNVR71	10	5471679	5608014	136335	both	1X90，2P30	2
CNVR72	10	6286761	6341853	55092	loss	1X135	1
CNVR73	10	26022684	26120414	97730	loss	1X115	1
CNVR74	10	52025204	52249156	223952	loss	2P18，2P24	2
CNVR75	11	4870206	4959489	89283	gain	1x164	1
CNVR76	11	37260128	37328150	68022	loss	1X66	1
CNVR77	11	64362716	64368094	5378	loss	2P24	1
CNVR78	11	67375641	67422576	46935	gain	2P31，1X31	2
CNVR79	11	70685626	71912745	1227119	both	1x98，1x24，1X145，1X95，1X134，1X136，1X132，1x30，1x160，1x07，1x08F1，1X169，1X51，1X38，1X20	15
CNVR80	12	10698900	10854247	155347	loss	1X38	1
CNVR81	12	15826689	15883731	57042	gain	2P15F1	1
CNVR82	12	50892615	50930355	37740	gain	1x72F2，1X91，1X102，1X120，1X68，1X167，1X147，1X148，1X149，1X146	13
CNVR83	13	13172438	13338209	165771	gain	1x162	1
CNVR84	13	38657796	38691669	33873	loss	1X66	1
CNVR85	13	110509364	110802738	293374	gain	1X110	1
CNVR86	13	115174088	115189564	15476	loss	1X142	1
CNVR87	13	122236226	122297535	61309	loss	2P35	1
CNVR88	13	139917496	140107787	190291	loss	1X09F1	1
CNVR89	13	140124343	140205546	81203	gain	1X09F1	1
CNVR90	13	158026997	158150530	123533	loss	2P18	1
CNVR91	13	170612751	170944031	331280	gain	1x116，1x21，1X104，1X144，1X138	5
CNVR92	13	172288990	172299433	10443	gain	1X102，1x08F1	2
CNVR93	13	178290661	178443013	152352	gain	1x08F1	1
CNVR94	13	182315832	183107823	791991	gain	1x08F1	1
CNVR95	13	183694816	184695146	1000330	gain	1x08F1	1
CNVR96	13	185233204	185935406	702202	gain	1x08F1	1
CNVR97	13	186636192	187048388	412196	gain	1x08F1	1
CNVR98	13	187647598	187926555	278957	gain	1x08F1	1
CNVR99	13	188485623	190407651	1922028	both	1x08F1	1
CNVR100	13	190593689	190969594	375905	gain	1x08F1	1
CNVR101	13	191660790	192272753	611963	gain	1x08F1	1
CNVR102	13	192739452	194386412	1646960	gain	1x08F1	1
CNVR103	13	194748204	195122760	374556	gain	1x08F1	1
CNVR104	13	195638599	197656323	2017724	both	1x08F1，1X113，1X09F1，2P26	4
CNVR105	13	198165206	199196126	1030920	gain	1x08F1	1
CNVR106	13	199308789	202728252	3419463	gain	1x08F1	1
CNVR107	13	203080799	205804998	2724199	gain	1x08F1，1X09F1	2
CNVR108	13	206171736	206389163	217427	gain	1x08F1，2P29	2
CNVR109	13	206600113	207108562	508449	gain	1x08F1	1
CNVR110	13	207771914	208077029	305115	gain	1x08F1	1
CNVR111	13	209155239	212757383	3602144	both	1x08F1，2P28，1x119，1X110，1X115，1X106F1	6
CNVR112	13	213446014	213545042	99028	loss	2P34，2P35	2
CNVR113	13	213691291	214465106	773815	gain	1x08F1	1
CNVR114	13	215504606	215828463	323857	gain	1x08F1	1
CNVR115	13	216399345	217027218	627873	gain	1x08F1	1
CNVR116	14	3815879	3862162	46283	loss	1X113	1
CNVR117	14	29093013	29160467	67454	gain	2P02	1
CNVR118	14	59846756	59957359	110603	gain	1X59	1
CNVR119	14	63336064	63401735	65671	gain	2P14	1
CNVR120	14	69219662	69274225	54563	gain	2P02	1
CNVR121	14	72591127	72800093	208966	loss	1x98，1X71F1，1X171，1X67，1X83，1x81，1X113	7
CNVR122	14	73600295	73755058	154763	loss	1x161	1
CNVR123	14	89402153	89494786	92633	loss	1X10	1
CNVR124	14	130817022	130865038	48016	loss	1x116	1
CNVR125	14	140328757	140360858	32101	loss	1x72F2，1X68	2
CNVR126	14	146585571	146637257	51686	gain	2P30	1
CNVR127	14	147744084	147788275	44191	gain	1X149	1
CNVR128	14	151919690	151959968	40278	gain	2P14	1
CNVR129	15	7444538	7497409	52871	loss	1X166	1
CNVR130	15	13314232	13371964	57732	gain	2P33	1
CNVR131	15	31495864	31561161	65297	gain	1X68	1
CNVR132	15	53632632	53688960	56328	gain	2P24	1
CNVR133	15	93240320	93316570	76250	gain	1X172，1X173，1X04F1，1X169，1X170	5
CNVR134	15	139192454	139219567	27113	gain	1X29	1
CNVR135	16	17875575	18134235	258660	loss	1X67	1
CNVR136	16	18897025	18930723	33698	gain	2P30	1
CNVR137	16	29016623	29058649	42026	gain	2P18，1X168，1X59	3
CNVR138	16	44362264	44429692	67428	loss	2P15F1	1
CNVR139	16	71439338	71638433	199095	gain	1X83	1
CNVR140	16	79872744	80020682	147938	loss	2P18	1
CNVR141	16	83735464	83806833	71369	gain	2P35	1
CNVR142	17	15175	249970	234795	gain	2P31，1X31	2
CNVR143	17	435637	447979	12342	gain	2P15F1，2P33	2
CNVR144	17	37623168	37652474	29306	gain	1X170	1
CNVR151	17	62012263	62050089	37826	gain	1X59	1
CNVR145	17	58450650	58531296	80646	gain	1X155，1X23	2
CNVR146	18	23727309	23813414	86105	loss	1X10	1
CNVR147	18	29295240	29348051	52811	loss	1X102，1x133，1X87F1，1X135	4
CNVR148	18	42108500	42219500	111000	loss	2P02	1
CNVR149	18	53956586	54010221	53635	loss	1x161	1
CNVR150	X	124740	1280682	1155942	gain	1x162，1X88F1，1X68，1X04F1，1X09F1，1X13，1X166，1X79，1X173，1X104，1X38，1X87F1，1X10，1X167，1X19，1X174，2P34，2P35	18
CNVR152	X	8672519	8718698	46179	loss	1x164，1x160，1x99，1X165	4
CNVR153	X	11345780	11443525	97745	gain	1x162，1X104，1X88F1，1X38，1X04F1，1X39，1X09F1，1X13，1X29，1X68，1X87F1，1X10，1X155，1X166，1X79，1X167，1X19，1X173，1X174，2P34，2P35	21
CNVR154	X	24739127	24829628	90501	loss	1x72F2，1X90，1X88F1，1X68，1X171，1X95	6
CNVR155	X	27092597	28389686	1297089	gain	1X18，1x103	2
CNVR156	X	30562520	30747961	185441	gain	1X10	1
CNVR157	X	32076524	34472337	2395813	gain	1X10	1
CNVR158	X	46683760	46763140	79380	gain	1X10	1
CNVR159	X	47951941	48308192	356251	gain	1X104，1X88F1，1X09F1，1X68，1X87F1，1X10，1X166，2P35	8
CNVR160	X	52288809	55073511	2784702	gain	1X104，1X38，1X166	3
CNVR161	X	57672454	62086511	4414057	gain	1X10	1
CNVR162	X	64571859	64882657	310798	gain	1X87F1，1X10，1X167	3
CNVR163	X	67528213	75703473	8175260	gain	1X09F1，1X68，1X87F1，1X10，1X166	5
CNVR164	X	78000797	84984929	6984132	gain	1X10，1X155，1X166，1X167，1X39，1X174，2P35，2P34，1X29，1X87F1，1X19，1x159，1x162，1X04F1，1X13，1X79，1X167，1X173，1X104，1X38，1X09F1，1X68，1X166	23
CNVR165	X	86201492	86419002	217510	gain	1X10	1
CNVR166	X	87901203	92882230	4981027	gain	1x162，1X104，1X88F1，1X38，1X04F1，1X39，1X09F1，1X13，1X29，1X68，1X87F1，1X10，1X155，1X166，1X79，1X167，1X19，1X173，1X174，2P34，2P35	21
CNVR167	X	108647614	109121920	474306	gain	1X11，1x82，2P27	3
CNVR168	X	110165834	110208364	42530	loss	1X29	1
CNVR169	X	117574951	118990898	1415947	gain	1X10	1
CNVR170	X	119762138	121399063	1636925	gain	1x162，1x160，1X104，1X88F1，1X38，1X04F1，1X39，1X09F1，1X13，1X29，1X68，1X87F1，1X10，1X155，1X166，1X79，1X167，1X19，1X173，1X174，2P34，2P35	22
CNVR171	X	134501175	134779719	278544	gain	1x98，2P16	2
CNVR172	X	141433236	142000976	567740	gain	1x82，1x159	2

## Sheet: Table B
Table B. Information of genes in the identified CNVRs
CNVR ID	CNVR Start	CNVR End	Chr.	Ensembl Gene ID	Ensembl Transcript ID	Gene Start (bp)	Gene End (bp)	Associated Gene Name	Gene Biotype	Strand	Type
CNVR1	28640879	28753934	1	ENSSSCG00000004146	ENSSSCT00000036391	28642044	28700509	REPS1	protein_coding	1	loss
CNVR1	28640879	28753934	1	ENSSSCG00000004147	ENSSSCT00000004583	28702732	28766662	ECT2L	protein_coding	-1	loss
CNVR5	75540483	75602201	1	ENSSSCG00000004356	ENSSSCT00000004813	75563707	75582520	MCHR2	protein_coding	-1	loss
CNVR10	268547138	268597486	1	ENSSSCG00000005377	ENSSSCT00000005917	268374986	268740816		protein_coding	-1	gain
CNVR11	275605644	275747658	1	ENSSSCG00000005418	ENSSSCT00000005961	275640598	275641551		protein_coding	1	loss
CNVR11	275605644	275747658	1	ENSSSCG00000026241	ENSSSCT00000027959	275665250	275666206		protein_coding	1	loss
CNVR11	275605644	275747658	1	ENSSSCG00000027930	ENSSSCT00000029721	275675622	275676578		protein_coding	1	loss
CNVR11	275605644	275747658	1	ENSSSCG00000022665	ENSSSCT00000024293	275688299	275689252		protein_coding	1	loss
CNVR11	275605644	275747658	1	ENSSSCG00000005423	ENSSSCT00000005966	275740052	275862912		protein_coding	-1	loss
CNVR12	284443528	284486575	1	ENSSSCG00000005474	ENSSSCT00000006020	284447110	284451960		protein_coding	-1	gain
CNVR13	294821198	294867674	1	ENSSSCG00000028903	ENSSSCT00000030742	294845761	294846711		protein_coding	-1	gain
CNVR13	294821198	294867674	1	ENSSSCG00000005536	ENSSSCT00000006087	294857189	294858127		protein_coding	-1	gain
CNVR14	295241692	295462741	1	ENSSSCG00000026287	ENSSSCT00000025643	295304653	295305610		pseudogene	1	gain
CNVR14	295241692	295462741	1	ENSSSCG00000027732	ENSSSCT00000029506	295277041	295278003		protein_coding	1	gain
CNVR14	295241692	295462741	1	ENSSSCG00000029564	ENSSSCT00000031410	295289239	295290180		protein_coding	1	gain
CNVR14	295241692	295462741	1	ENSSSCG00000022433	ENSSSCT00000024061	295393642	295394583		protein_coding	1	gain
CNVR14	295241692	295462741	1	ENSSSCG00000005544	ENSSSCT00000006095	295439888	295440820		protein_coding	1	gain
CNVR14	295241692	295462741	1	ENSSSCG00000025505	ENSSSCT00000027199	295460588	295461529		protein_coding	-1	gain
CNVR15	296616443	296747604	1	ENSSSCG00000024893	ENSSSCT00000006119	296616432	296617370	OR1J2	protein_coding	1	loss
CNVR15	296616443	296747604	1	ENSSSCG00000027081	ENSSSCT00000028837	296705379	296706323		protein_coding	1	loss
CNVR16	296787813	296854248	1	ENSSSCG00000024099	ENSSSCT00000006099	296790658	296791701		protein_coding	1	gain
CNVR17	311929352	312829468	1	ENSSSCG00000005793	ENSSSCT00000006369	312068410	312069309		pseudogene	-1	both
CNVR17	311929352	312829468	1	ENSSSCG00000005800	ENSSSCT00000006376	312344575	312345542		pseudogene	1	both
CNVR17	311929352	312829468	1	ENSSSCG00000005808	ENSSSCT00000006384	312488059	312489016		pseudogene	1	both
CNVR17	311929352	312829468	1	ENSSSCG00000005813	ENSSSCT00000006389	312559736	312560693		pseudogene	1	both
CNVR17	311929352	312829468	1	ENSSSCG00000005810	ENSSSCT00000006386	312635954	312636911		pseudogene	-1	both
CNVR17	311929352	312829468	1	ENSSSCG00000005790	ENSSSCT00000006366	312080862	312081788		protein_coding	1	both
CNVR17	311929352	312829468	1	ENSSSCG00000005791	ENSSSCT00000006367	312108952	312109890		protein_coding	-1	both
CNVR17	311929352	312829468	1	ENSSSCG00000023281	ENSSSCT00000023552	312186369	312187484		protein_coding	1	both
CNVR17	311929352	312829468	1	ENSSSCG00000005794	ENSSSCT00000006370	312194069	312195030		protein_coding	-1	both
CNVR17	311929352	312829468	1	ENSSSCG00000005795	ENSSSCT00000006371	312203726	312204688	OR10AG1	protein_coding	-1	both
CNVR17	311929352	312829468	1	ENSSSCG00000005796	ENSSSCT00000006372	312226076	312227008		protein_coding	-1	both
CNVR17	311929352	312829468	1	ENSSSCG00000005797	ENSSSCT00000006373	312263295	312264625		protein_coding	1	both
CNVR17	311929352	312829468	1	ENSSSCG00000024409	ENSSSCT00000026066	312290104	312291048		protein_coding	-1	both
CNVR17	311929352	312829468	1	ENSSSCG00000020974	ENSSSCT00000022575	312309919	312310863		protein_coding	-1	both
CNVR17	311929352	312829468	1	ENSSSCG00000005801	ENSSSCT00000006377	312359048	312359977		protein_coding	1	both
CNVR17	311929352	312829468	1	ENSSSCG00000005817	ENSSSCT00000006393	312377137	312378084		protein_coding	1	both
CNVR17	311929352	312829468	1	ENSSSCG00000024808	ENSSSCT00000006380	312400631	312401569		protein_coding	1	both
CNVR17	311929352	312829468	1	ENSSSCG00000005805	ENSSSCT00000006381	312412169	312413113		protein_coding	1	both
CNVR17	311929352	312829468	1	ENSSSCG00000024645	ENSSSCT00000006382	312471663	312472604		protein_coding	1	both
CNVR17	311929352	312829468	1	ENSSSCG00000022746	ENSSSCT00000024381	312483392	312484342	OR8K5	protein_coding	1	both
CNVR17	311929352	312829468	1	ENSSSCG00000029786	ENSSSCT00000023557	312494393	312509726		protein_coding	1	both
CNVR17	311929352	312829468	1	ENSSSCG00000030686	ENSSSCT00000022267	312532571	312534566		protein_coding	-1	both
CNVR17	311929352	312829468	1	ENSSSCG00000005812	ENSSSCT00000006388	312571911	312573112		protein_coding	-1	both
CNVR17	311929352	312829468	1	ENSSSCG00000005809	ENSSSCT00000006385	312609075	312610016		protein_coding	-1	both
CNVR17	311929352	312829468	1	ENSSSCG00000029133	ENSSSCT00000006392	312728407	312729369		protein_coding	-1	both
CNVR17	311929352	312829468	1	ENSSSCG00000005802	ENSSSCT00000006378	312738876	312741358		protein_coding	-1	both
CNVR17	311929352	312829468	1	ENSSSCG00000027333	ENSSSCT00000006395	312751494	312753489		protein_coding	1	both
CNVR17	311929352	312829468	1	ENSSSCG00000005820	ENSSSCT00000006397	312773962	312775359		protein_coding	-1	both
CNVR17	311929352	312829468	1	ENSSSCG00000027284	ENSSSCT00000029037	312789943	312790881		protein_coding	1	both
CNVR18	313111618	313480723	1	ENSSSCG00000005822	ENSSSCT00000006399	313147803	313148705		protein_coding	1	both
CNVR19	13853695	14043003	2	ENSSSCG00000029871	ENSSSCT00000028224	13856717	13858593		protein_coding	1	gain
CNVR19	13853695	14043003	2	ENSSSCG00000013192	ENSSSCT00000014412	13866053	13866997		protein_coding	1	gain
CNVR19	13853695	14043003	2	ENSSSCG00000013193	ENSSSCT00000014413	13884511	13885461		protein_coding	1	gain
CNVR19	13853695	14043003	2	ENSSSCG00000013201	ENSSSCT00000014421	14030126	14031853	OR9G4	protein_coding	1	gain
CNVR19	13853695	14043003	2	ENSSSCG00000013200	ENSSSCT00000014420	14034262	14035197		protein_coding	-1	gain
CNVR20	15202906	15501488	2	ENSSSCG00000026758	ENSSSCT00000024224	15205324	15206244		protein_coding	-1	gain
CNVR20	15202906	15501488	2	ENSSSCG00000023843	ENSSSCT00000023677	15227115	15228041		protein_coding	-1	gain
CNVR20	15202906	15501488	2	ENSSSCG00000029368	ENSSSCT00000015853	15248552	15249478		protein_coding	-1	gain
CNVR20	15202906	15501488	2	ENSSSCG00000021107	ENSSSCT00000015854	15260455	15261384		protein_coding	-1	gain
CNVR20	15202906	15501488	2	ENSSSCG00000014505	ENSSSCT00000015855	15272577	15273494		protein_coding	-1	gain
CNVR20	15202906	15501488	2	ENSSSCG00000026901	ENSSSCT00000015856	15286972	15287901		protein_coding	-1	gain
CNVR20	15202906	15501488	2	ENSSSCG00000023685	ENSSSCT00000015857	15292901	15293830		protein_coding	-1	gain
CNVR20	15202906	15501488	2	ENSSSCG00000025683	ENSSSCT00000027209	15312617	15313546		protein_coding	-1	gain
CNVR20	15202906	15501488	2	ENSSSCG00000014509	ENSSSCT00000015859	15331124	15332056		protein_coding	1	gain
CNVR20	15202906	15501488	2	ENSSSCG00000021908	ENSSSCT00000015860	15369768	15370700		protein_coding	-1	gain
CNVR20	15202906	15501488	2	ENSSSCG00000024703	ENSSSCT00000026403	15383646	15384545		protein_coding	-1	gain
CNVR20	15202906	15501488	2	ENSSSCG00000027805	ENSSSCT00000023440	15400277	15401209		protein_coding	-1	gain
CNVR20	15202906	15501488	2	ENSSSCG00000024280	ENSSSCT00000014429	15490567	15491496		protein_coding	-1	gain
CNVR25	38279249	38614109	2	ENSSSCG00000018221	ENSSSCT00000019816	38438503	38438605		miRNA	1	gain
CNVR28	158549163	159250446	2	ENSSSCG00000014452	ENSSSCT00000015800	158558893	158560345	OR4P4	protein_coding	1	gain
CNVR28	158549163	159250446	2	ENSSSCG00000014453	ENSSSCT00000015801	158574719	158575657		protein_coding	-1	gain
CNVR28	158549163	159250446	2	ENSSSCG00000014454	ENSSSCT00000015802	158586559	158587488		protein_coding	-1	gain
CNVR28	158549163	159250446	2	ENSSSCG00000014455	ENSSSCT00000015803	158613163	158614101		protein_coding	1	gain
CNVR28	158549163	159250446	2	ENSSSCG00000014456	ENSSSCT00000015804	158620781	158621734		protein_coding	1	gain
CNVR28	158549163	159250446	2	ENSSSCG00000014457	ENSSSCT00000015805	158629441	158630382		protein_coding	1	gain
CNVR28	158549163	159250446	2	ENSSSCG00000014458	ENSSSCT00000015806	158668902	158669843	OR5D18	protein_coding	1	gain
CNVR28	158549163	159250446	2	ENSSSCG00000014459	ENSSSCT00000015807	158676090	158677251		protein_coding	1	gain
CNVR28	158549163	159250446	2	ENSSSCG00000014460	ENSSSCT00000015808	158684024	158684959	OR5D16	protein_coding	1	gain
CNVR28	158549163	159250446	2	ENSSSCG00000014461	ENSSSCT00000015809	158693296	158694207		protein_coding	1	gain
CNVR28	158549163	159250446	2	ENSSSCG00000014462	ENSSSCT00000015810	158698922	158701046		protein_coding	-1	gain
CNVR28	158549163	159250446	2	ENSSSCG00000014463	ENSSSCT00000015812	158709851	158710780		protein_coding	-1	gain
CNVR28	158549163	159250446	2	ENSSSCG00000014464	ENSSSCT00000015813	158720990	158721925		protein_coding	-1	gain
CNVR28	158549163	159250446	2	ENSSSCG00000028285	ENSSSCT00000030076	158734175	158735107		protein_coding	-1	gain
CNVR28	158549163	159250446	2	ENSSSCG00000014544	ENSSSCT00000015894	158743369	158745100		protein_coding	-1	gain
CNVR28	158549163	159250446	2	ENSSSCG00000029018	ENSSSCT00000030853	158759307	158760251		protein_coding	1	gain
CNVR28	158549163	159250446	2	ENSSSCG00000029734	ENSSSCT00000025416	158792402	158793346	OR5I1	protein_coding	-1	gain
CNVR28	158549163	159250446	2	ENSSSCG00000027048	ENSSSCT00000028803	158807843	158808787		protein_coding	-1	gain
CNVR28	158549163	159250446	2	ENSSSCG00000025070	ENSSSCT00000026781	158821279	158822223		protein_coding	1	gain
CNVR28	158549163	159250446	2	ENSSSCG00000030464	ENSSSCT00000032322	158829553	158830533		protein_coding	-1	gain
CNVR28	158549163	159250446	2	ENSSSCG00000028824	ENSSSCT00000030651	158845292	158846236		protein_coding	-1	gain
CNVR28	158549163	159250446	2	ENSSSCG00000029068	ENSSSCT00000030899	158853148	158854074		protein_coding	-1	gain
CNVR28	158549163	159250446	2	ENSSSCG00000025350	ENSSSCT00000025351	158860682	158862297		protein_coding	-1	gain
CNVR28	158549163	159250446	2	ENSSSCG00000025526	ENSSSCT00000027227	158899472	158900449	OR5AS1	protein_coding	1	gain
CNVR28	158549163	159250446	2	ENSSSCG00000030332	ENSSSCT00000015817	158915646	158916593		protein_coding	-1	gain
CNVR28	158549163	159250446	2	ENSSSCG00000025951	ENSSSCT00000027681	158924406	158925338		protein_coding	-1	gain
CNVR28	158549163	159250446	2	ENSSSCG00000021605	ENSSSCT00000015818	158985405	158986352		protein_coding	1	gain
CNVR28	158549163	159250446	2	ENSSSCG00000027258	ENSSSCT00000023263	158992126	158993565		protein_coding	-1	gain
CNVR28	158549163	159250446	2	ENSSSCG00000022552	ENSSSCT00000030828	159008934	159010668		protein_coding	-1	gain
CNVR28	158549163	159250446	2	ENSSSCG00000014465	ENSSSCT00000015814	159030162	159031103		protein_coding	1	gain
CNVR28	158549163	159250446	2	ENSSSCG00000027639	ENSSSCT00000029866	159038414	159039373		protein_coding	-1	gain
CNVR28	158549163	159250446	2	ENSSSCG00000021052	ENSSSCT00000015820	159050504	159051451		protein_coding	-1	gain
CNVR28	158549163	159250446	2	ENSSSCG00000023979	ENSSSCT00000015822	159063147	159064091		protein_coding	-1	gain
CNVR28	158549163	159250446	2	ENSSSCG00000029327	ENSSSCT00000015821	159087869	159088813		protein_coding	-1	gain
CNVR28	158549163	159250446	2	ENSSSCG00000014474	ENSSSCT00000015823	159095777	159096721		protein_coding	1	gain
CNVR28	158549163	159250446	2	ENSSSCG00000014475	ENSSSCT00000015824	159113986	159115353		protein_coding	1	gain
CNVR28	158549163	159250446	2	ENSSSCG00000014476	ENSSSCT00000015826	159137831	159138778		protein_coding	1	gain
CNVR28	158549163	159250446	2	ENSSSCG00000014477	ENSSSCT00000015827	159143812	159144750	OR5J2	protein_coding	-1	gain
CNVR28	158549163	159250446	2	ENSSSCG00000024607	ENSSSCT00000015834	159169767	159170711		protein_coding	-1	gain
CNVR28	158549163	159250446	2	ENSSSCG00000024085	ENSSSCT00000015833	159184045	159184989		protein_coding	-1	gain
CNVR28	158549163	159250446	2	ENSSSCG00000028595	ENSSSCT00000015828	159195575	159196522		protein_coding	1	gain
CNVR28	158549163	159250446	2	ENSSSCG00000030342	ENSSSCT00000032224	159207648	159208607		protein_coding	1	gain
CNVR28	158549163	159250446	2	ENSSSCG00000028482	ENSSSCT00000015830	159216556	159217512		protein_coding	1	gain
CNVR28	158549163	159250446	2	ENSSSCG00000014481	ENSSSCT00000015831	159228175	159229443		protein_coding	1	gain
CNVR28	158549163	159250446	2	ENSSSCG00000014482	ENSSSCT00000015832	159230905	159231861		protein_coding	-1	gain
CNVR28	158549163	159250446	2	ENSSSCG00000022608	ENSSSCT00000022753	158569526	158570431		pseudogene	1	gain
CNVR28	158549163	159250446	2	ENSSSCG00000030308	ENSSSCT00000023728	158755249	158756062		pseudogene	-1	gain
CNVR28	158549163	159250446	2	ENSSSCG00000027945	ENSSSCT00000032064	158976501	158977438		pseudogene	1	gain
CNVR28	158549163	159250446	2	ENSSSCG00000014491	ENSSSCT00000015841	159245667	159246597		pseudogene	-1	gain
CNVR30	5713062	5763996	3	ENSSSCG00000007603	ENSSSCT00000008343	5732132	5740519	NPTX2	protein_coding	1	gain
CNVR33	17349049	17405985	3	ENSSSCG00000024058	ENSSSCT00000028525	17349584	17355942	SLC5A2	protein_coding	-1	loss
CNVR33	17349049	17405985	3	ENSSSCG00000025245	ENSSSCT00000031066	17362501	17367305	ARMC5	protein_coding	-1	loss
CNVR33	17349049	17405985	3	ENSSSCG00000027960	ENSSSCT00000029743	17379860	17380831		protein_coding	1	loss
CNVR33	17349049	17405985	3	ENSSSCG00000025688	ENSSSCT00000027708	17385587	17389044	COX6A2	protein_coding	-1	loss
CNVR33	17349049	17405985	3	ENSSSCG00000024091	ENSSSCT00000030557	17401301	17415367		protein_coding	1	loss
CNVR42	39998067	40125899	4	ENSSSCG00000006070	ENSSSCT00000006661	39990794	40005773	COX6C	protein_coding	1	loss
CNVR42	39998067	40125899	4	ENSSSCG00000006071	ENSSSCT00000006662	40006392	40202274		protein_coding	-1	loss
CNVR43	3813901	3844970	5	ENSSSCG00000000046	ENSSSCT00000000051	3810426	3815076	CYP2D6	protein_coding	-1	gain
CNVR44	21238084	21339891	5	ENSSSCG00000026447	ENSSSCT00000022877	21256500	21258129		protein_coding	1	gain
CNVR44	21238084	21339891	5	ENSSSCG00000024451	ENSSSCT00000026114	21266917	21267855		protein_coding	-1	gain
CNVR44	21238084	21339891	5	ENSSSCG00000021160	ENSSSCT00000022768	21279720	21280679		protein_coding	-1	gain
CNVR44	21238084	21339891	5	ENSSSCG00000028989	ENSSSCT00000000338	21296500	21297438		protein_coding	-1	gain
CNVR44	21238084	21339891	5	ENSSSCG00000000318	ENSSSCT00000000339	21324271	21325200	OR6C4	protein_coding	-1	gain
CNVR44	21238084	21339891	5	ENSSSCG00000000351	ENSSSCT00000000373	21337563	21338498		protein_coding	-1	gain
CNVR45	26724414	26895376	5	ENSSSCG00000000456	ENSSSCT00000000492	26810232	26867980	SLC16A7	protein_coding	1	loss
CNVR47	39588852	39799087	5	ENSSSCG00000019983	ENSSSCT00000021578	39634722	39634803	U4	snRNA	1	gain
CNVR48	11229081	11401849	6	ENSSSCG00000021551	ENSSSCT00000032493	11143433	11358986		protein_coding	-1	loss
CNVR50	13731502	13812780	6	ENSSSCG00000002729	ENSSSCT00000003024	13733590	13819514		protein_coding	1	gain
CNVR51	27402328	27581833	6	ENSSSCG00000002827	ENSSSCT00000003128	27402625	27447986	SLC6A2	protein_coding	-1	loss
CNVR51	27402328	27581833	6	ENSSSCG00000002828	ENSSSCT00000003129	27466765	27524179	LPCAT2	protein_coding	-1	loss
CNVR51	27402328	27581833	6	ENSSSCG00000030744	ENSSSCT00000036424	27482694	27483899	CAPNS2	protein_coding	-1	loss
CNVR51	27402328	27581833	6	ENSSSCG00000002829	ENSSSCT00000003130	27526398	27553927	MMP2	protein_coding	-1	loss
CNVR52	1532038	1681623	7	ENSSSCG00000028777	ENSSSCT00000031472	1674371	1690166	MYLK4	protein_coding	-1	loss
CNVR53	7022961	7187201	7	ENSSSCG00000001035	ENSSSCT00000001128	7035743	7056186	OFCC1	protein_coding	-1	loss
CNVR54	25215084	26187687	7	ENSSSCG00000029853	ENSSSCT00000024831	25983303	25985200		protein_coding	1	both
CNVR54	25215084	26187687	7	ENSSSCG00000001268	ENSSSCT00000001383	25992079	25993020		protein_coding	-1	both
CNVR54	25215084	26187687	7	ENSSSCG00000001297	ENSSSCT00000001412	26018069	26018992		protein_coding	1	both
CNVR54	25215084	26187687	7	ENSSSCG00000024940	ENSSSCT00000001424	26027604	26028551		protein_coding	-1	both
CNVR54	25215084	26187687	7	ENSSSCG00000021066	ENSSSCT00000027608	26050525	26051591		protein_coding	1	both
CNVR54	25215084	26187687	7	ENSSSCG00000022762	ENSSSCT00000024392	26061410	26062354		protein_coding	1	both
CNVR54	25215084	26187687	7	ENSSSCG00000024557	ENSSSCT00000029666	26072861	26074278		protein_coding	-1	both
CNVR54	25215084	26187687	7	ENSSSCG00000024582	ENSSSCT00000001418	26146636	26147598		protein_coding	-1	both
CNVR54	25215084	26187687	7	ENSSSCG00000001253	ENSSSCT00000001368	25333794	25334748		pseudogene	-1	both
CNVR54	25215084	26187687	7	ENSSSCG00000001256	ENSSSCT00000001371	25396945	25397917		pseudogene	1	both
CNVR54	25215084	26187687	7	ENSSSCG00000001312	ENSSSCT00000001428	26162715	26163639		pseudogene	1	both
CNVR54	25215084	26187687	7	ENSSSCG00000001242	ENSSSCT00000001355	25210913	25240202	GABBR1	protein_coding	1	both
CNVR54	25215084	26187687	7	ENSSSCG00000022043	ENSSSCT00000001364	25246547	25247485	OLF42-1	protein_coding	-1	both
CNVR54	25215084	26187687	7	ENSSSCG00000025690	ENSSSCT00000001365	25259778	25260716	OLF42-2	protein_coding	-1	both
CNVR54	25215084	26187687	7	ENSSSCG00000028032	ENSSSCT00000001366	25271692	25272630	OLF42-3	protein_coding	-1	both
CNVR54	25215084	26187687	7	ENSSSCG00000027504	ENSSSCT00000030329	25304819	25317663	OLF42-1	protein_coding	-1	both
CNVR54	25215084	26187687	7	ENSSSCG00000001252	ENSSSCT00000001367	25330261	25332807	UBD	protein_coding	1	both
CNVR54	25215084	26187687	7	ENSSSCG00000017655	ENSSSCT00000019219	25358231	25359145		protein_coding	-1	both
CNVR54	25215084	26187687	7	ENSSSCG00000026875	ENSSSCT00000022507	25369478	25370439		protein_coding	1	both
CNVR54	25215084	26187687	7	ENSSSCG00000001254	ENSSSCT00000001369	25373473	25374327		protein_coding	1	both
CNVR54	25215084	26187687	7	ENSSSCG00000001255	ENSSSCT00000001370	25382745	25383668		protein_coding	-1	both
CNVR54	25215084	26187687	7	ENSSSCG00000028714	ENSSSCT00000001372	25404552	25405478		protein_coding	-1	both
CNVR54	25215084	26187687	7	ENSSSCG00000001258	ENSSSCT00000001373	25412774	25414596		protein_coding	-1	both
CNVR54	25215084	26187687	7	ENSSSCG00000026800	ENSSSCT00000028551	25423628	25424548		protein_coding	-1	both
CNVR54	25215084	26187687	7	ENSSSCG00000028622	ENSSSCT00000001374	25437627	25438553		protein_coding	1	both
CNVR54	25215084	26187687	7	ENSSSCG00000022817	ENSSSCT00000024447	25449174	25450103		protein_coding	-1	both
CNVR54	25215084	26187687	7	ENSSSCG00000030290	ENSSSCT00000032167	25470547	25471482		protein_coding	-1	both
CNVR54	25215084	26187687	7	ENSSSCG00000023024	ENSSSCT00000001375	25483895	25484821		protein_coding	-1	both
CNVR54	25215084	26187687	7	ENSSSCG00000028426	ENSSSCT00000030223	25543388	25544314		protein_coding	-1	both
CNVR54	25215084	26187687	7	ENSSSCG00000021520	ENSSSCT00000001392	25555450	25556864		protein_coding	1	both
CNVR54	25215084	26187687	7	ENSSSCG00000030245	ENSSSCT00000032125	25642479	25643405		protein_coding	-1	both
CNVR54	25215084	26187687	7	ENSSSCG00000023402	ENSSSCT00000019225	25654666	25655628		protein_coding	-1	both
CNVR54	25215084	26187687	7	ENSSSCG00000025278	ENSSSCT00000001396	25668014	25668940		protein_coding	-1	both
CNVR54	25215084	26187687	7	ENSSSCG00000020762	ENSSSCT00000001390	25707901	25708827		protein_coding	-1	both
CNVR54	25215084	26187687	7	ENSSSCG00000025358	ENSSSCT00000001391	25740114	25741040		protein_coding	-1	both
CNVR54	25215084	26187687	7	ENSSSCG00000021894	ENSSSCT00000001397	25751943	25753357		protein_coding	1	both
CNVR54	25215084	26187687	7	ENSSSCG00000030598	ENSSSCT00000032471	25760807	25761754	OR12D3	protein_coding	1	both
CNVR54	25215084	26187687	7	ENSSSCG00000001279	ENSSSCT00000001394	25775981	25776937		protein_coding	1	both
CNVR54	25215084	26187687	7	ENSSSCG00000001286	ENSSSCT00000001401	25794642	25795595		protein_coding	1	both
CNVR54	25215084	26187687	7	ENSSSCG00000023411	ENSSSCT00000030367	25861917	25862846		protein_coding	-1	both
CNVR54	25215084	26187687	7	ENSSSCG00000026436	ENSSSCT00000001406	25869234	25870169		protein_coding	-1	both
CNVR54	25215084	26187687	7	ENSSSCG00000023813	ENSSSCT00000001407	25894336	25895271		protein_coding	1	both
CNVR54	25215084	26187687	7	ENSSSCG00000021889	ENSSSCT00000001380	25901656	25902585		protein_coding	1	both
CNVR54	25215084	26187687	7	ENSSSCG00000027588	ENSSSCT00000029340	25953656	25954585		protein_coding	1	both
CNVR54	25215084	26187687	7	ENSSSCG00000001294	ENSSSCT00000001409	25969392	25970384		protein_coding	-1	both
CNVR54	25215084	26187687	7	ENSSSCG00000028462	ENSSSCT00000030258	25386139	25386245	U6	snRNA	-1	both
CNVR55	81790769	82096915	7	ENSSSCG00000022512	ENSSSCT00000026772	81789654	81794217	TRDC	protein_coding	-1	loss
CNVR55	81790769	82096915	7	ENSSSCG00000002053	ENSSSCT00000002296	81884262	81884708	TRADV1	protein_coding	-1	loss
CNVR55	81790769	82096915	7	ENSSSCG00000026675	ENSSSCT00000026928	81905098	81907677		protein_coding	-1	loss
CNVR55	81790769	82096915	7	ENSSSCG00000002055	ENSSSCT00000002298	82005128	82005649		protein_coding	-1	loss
CNVR55	81790769	82096915	7	ENSSSCG00000002056	ENSSSCT00000002299	82044373	82044905	TRAV41	protein_coding	-1	loss
CNVR55	81790769	82096915	7	ENSSSCG00000002057	ENSSSCT00000002301	82089753	82090341	TRDV2-2	protein_coding	-1	loss
CNVR56	108475290	108526629	7	ENSSSCG00000028718	ENSSSCT00000031767	108478261	108652250		protein_coding	1	gain
CNVR57	120515238	120550319	7	ENSSSCG00000002450	ENSSSCT00000002720	120438867	120614498	SLC24A4	protein_coding	1	gain
CNVR58	133427075	133522529	7	ENSSSCG00000029804	ENSSSCT00000025449	133431567	133433198		protein_coding	-1	gain
CNVR58	133427075	133522529	7	ENSSSCG00000025659	ENSSSCT00000002880	133451853	133452788		protein_coding	-1	gain
CNVR58	133427075	133522529	7	ENSSSCG00000002594	ENSSSCT00000030326	133462931	133464491	OR4K5	protein_coding	-1	gain
CNVR58	133427075	133522529	7	ENSSSCG00000022519	ENSSSCT00000002882	133497371	133498312		protein_coding	-1	gain
CNVR58	133427075	133522529	7	ENSSSCG00000028324	ENSSSCT00000002883	133511634	133512575		protein_coding	1	gain
CNVR59	133594228	133701066	7	ENSSSCG00000002614	ENSSSCT00000002901	133596076	133597074		protein_coding	-1	loss
CNVR59	133594228	133701066	7	ENSSSCG00000002608	ENSSSCT00000002895	133606548	133607528		protein_coding	1	loss
CNVR59	133594228	133701066	7	ENSSSCG00000026858	ENSSSCT00000028620	133631246	133632184		protein_coding	1	loss
CNVR59	133594228	133701066	7	ENSSSCG00000002605	ENSSSCT00000002892	133649436	133650347		protein_coding	1	loss
CNVR59	133594228	133701066	7	ENSSSCG00000002607	ENSSSCT00000002894	133675434	133677361		protein_coding	1	loss
CNVR59	133594228	133701066	7	ENSSSCG00000021993	ENSSSCT00000023615	133681954	133682901		protein_coding	-1	loss
CNVR59	133594228	133701066	7	ENSSSCG00000025366	ENSSSCT00000029222	133687829	133689938		protein_coding	1	loss
CNVR60	43462399	43878303	8	ENSSSCG00000008842	ENSSSCT00000009679	43550236	43602062	KIT	protein_coding	1	gain
CNVR60	43462399	43878303	8	ENSSSCG00000020497	ENSSSCT00000022092	43874124	43874204	U6	snRNA	-1	gain
CNVR62	121639240	121712755	8	ENSSSCG00000009145	ENSSSCT00000010014	121674959	121686198	OSTC	protein_coding	-1	gain
CNVR62	121639240	121712755	8	ENSSSCG00000009146	ENSSSCT00000010015	121707345	121711622	RPL34	protein_coding	-1	gain
CNVR62	121639240	121712755	8	ENSSSCG00000019109	ENSSSCT00000020704	121660638	121660771	U11	snRNA	-1	gain
CNVR66	3598721	3721967	9	ENSSSCG00000014618	ENSSSCT00000015968	3718554	3725457		protein_coding	1	gain
CNVR67	4297475	4336627	9	ENSSSCG00000024380	ENSSSCT00000015995	4300169	4301116		protein_coding	-1	gain
CNVR67	4297475	4336627	9	ENSSSCG00000021824	ENSSSCT00000015996	4323256	4324203		protein_coding	-1	gain
CNVR67	4297475	4336627	9	ENSSSCG00000014646	ENSSSCT00000015997	4333247	4334182		protein_coding	-1	gain
CNVR68	125100668	125316966	9	ENSSSCG00000015473	ENSSSCT00000016856	125173393	125186034	TMEM183A	protein_coding	1	gain
CNVR68	125100668	125316966	9	ENSSSCG00000015474	ENSSSCT00000016857	125188692	125235698		protein_coding	1	gain
CNVR68	125100668	125316966	9	ENSSSCG00000015475	ENSSSCT00000016858	125243803	125245882	MYOG	protein_coding	-1	gain
CNVR68	125100668	125316966	9	ENSSSCG00000021059	ENSSSCT00000028701	125294860	125334614	ADORA1	protein_coding	1	gain
CNVR69	148655056	148691522	9	ENSSSCG00000029907	ENSSSCT00000031404	148690451	148904043		protein_coding	1	gain
CNVR73	26022684	26120414	10	ENSSSCG00000010905	ENSSSCT00000011932	26048270	26071954	ATP6V1G3	protein_coding	-1	loss
CNVR79	70685626	71912745	11	ENSSSCG00000009499	ENSSSCT00000010416	71572954	71611317		protein_coding	-1	both
CNVR79	70685626	71912745	11	ENSSSCG00000028848	ENSSSCT00000028935	71618817	71635484		protein_coding	-1	both
CNVR79	70685626	71912745	11	ENSSSCG00000021301	ENSSSCT00000022411	71665110	71672836		protein_coding	1	both
CNVR79	70685626	71912745	11	ENSSSCG00000023598	ENSSSCT00000026561	71737765	71753518		protein_coding	1	both
CNVR79	70685626	71912745	11	ENSSSCG00000027851	ENSSSCT00000010413	71820276	71859355		protein_coding	-1	both
CNVR79	70685626	71912745	11	ENSSSCG00000009498	ENSSSCT00000010415	70591415	70739460		protein_coding	1	both
CNVR79	70685626	71912745	11	ENSSSCG00000009496	ENSSSCT00000010411	70792529	70827852		protein_coding	1	both
CNVR79	70685626	71912745	11	ENSSSCG00000026286	ENSSSCT00000027268	71066907	71081126		protein_coding	1	both
CNVR79	70685626	71912745	11	ENSSSCG00000022549	ENSSSCT00000022652	71084180	71099507		protein_coding	1	both
CNVR79	70685626	71912745	11	ENSSSCG00000026284	ENSSSCT00000027023	71182320	71227012		protein_coding	1	both
CNVR79	70685626	71912745	11	ENSSSCG00000009497	ENSSSCT00000010414	71298810	71453998		protein_coding	1	both
CNVR79	70685626	71912745	11	ENSSSCG00000024407	ENSSSCT00000026065	71345954	71346034		miRNA	-1	both
CNVR82	50892615	50930355	12	ENSSSCG00000017839	ENSSSCT00000019415	50907917	50908897		protein_coding	-1	gain
CNVR82	50892615	50930355	12	ENSSSCG00000017840	ENSSSCT00000019416	50917403	50918343		pseudogene	-1	gain
CNVR84	38657796	38691669	13	ENSSSCG00000020114	ENSSSCT00000021709	38672836	38672908	SNORD63	snoRNA	-1	loss
CNVR86	115174088	115189564	13	ENSSSCG00000011740	ENSSSCT00000012851	115121493	115201556	SERPINI1	protein_coding	1	loss
CNVR88	139917496	140107787	13	ENSSSCG00000026260	ENSSSCT00000031000	139829967	139925608	ATP13A5	protein_coding	-1	loss
CNVR88	139917496	140107787	13	ENSSSCG00000011821	ENSSSCT00000012933	139962874	140121941		protein_coding	-1	loss
CNVR88	139917496	140107787	13	ENSSSCG00000025546	ENSSSCT00000025821	140000239	140072309		protein_coding	1	loss
CNVR89	140124343	140205546	13	ENSSSCG00000011822	ENSSSCT00000012934	140194249	140230347	OPA1	protein_coding	1	gain
CNVR90	158026997	158150530	13	ENSSSCG00000025939	ENSSSCT00000027818	158098388	158099183		pseudogene	1	loss
CNVR91	170612751	170944031	13	ENSSSCG00000026824	ENSSSCT00000025409	170644340	170645266		protein_coding	-1	gain
CNVR92	172288990	172299433	13	ENSSSCG00000026824	ENSSSCT00000025409	170644340	170645266		protein_coding	-1	gain
CNVR93	178290661	178443013	13	ENSSSCG00000011995	ENSSSCT00000013124	178437354	178438181		protein_coding	-1	gain
CNVR94	182315832	183107823	13	ENSSSCG00000029127	ENSSSCT00000030798	182833132	182834038		protein_coding	-1	gain
CNVR95	183694816	184695146	13	ENSSSCG00000022789	ENSSSCT00000024901	183834656	183877970		protein_coding	-1	gain
CNVR95	183694816	184695146	13	ENSSSCG00000012000	ENSSSCT00000013131	184018402	184112967	GBE1	protein_coding	1	gain
CNVR95	183694816	184695146	13	ENSSSCG00000029384	ENSSSCT00000031865	184210770	184232276		protein_coding	-1	gain
CNVR97	186636192	187048388	13	ENSSSCG00000012001	ENSSSCT00000013132	186520074	186882856	ROBO1	protein_coding	1	gain
CNVR97	186636192	187048388	13	ENSSSCG00000028013	ENSSSCT00000029784	186755478	186755584	U6	snRNA	1	gain
CNVR98	187647598	187926555	13	ENSSSCG00000012002	ENSSSCT00000013133	187691228	187851594	ROBO2	protein_coding	-1	gain
CNVR99	188485623	190407651	13	ENSSSCG00000012004	ENSSSCT00000013135	189333225	189357220	LIPI	protein_coding	-1	both
CNVR99	188485623	190407651	13	ENSSSCG00000022325	ENSSSCT00000026978	189369705	189374147		protein_coding	1	both
CNVR99	188485623	190407651	13	ENSSSCG00000012005	ENSSSCT00000013136	189375477	189379121		protein_coding	1	both
CNVR99	188485623	190407651	13	ENSSSCG00000012006	ENSSSCT00000013137	189414690	189546760		protein_coding	1	both
CNVR99	188485623	190407651	13	ENSSSCG00000012007	ENSSSCT00000013138	189549389	189561047	HSPA13	protein_coding	-1	both
CNVR99	188485623	190407651	13	ENSSSCG00000012008	ENSSSCT00000013139	189683758	189716074	SAMSN1	protein_coding	-1	both
CNVR99	188485623	190407651	13	ENSSSCG00000021038	ENSSSCT00000028007	190062821	190066291	NRIP1	protein_coding	-1	both
CNVR100	190593689	190969594	13	ENSSSCG00000024623	ENSSSCT00000022689	190890292	191009147	USP25	protein_coding	1	gain
CNVR102	192739452	194386412	13	ENSSSCG00000012018	ENSSSCT00000034707	192971795	193001979	CHODL	protein_coding	1	gain
CNVR102	192739452	194386412	13	ENSSSCG00000012019	ENSSSCT00000013150	192997371	193141213	TMPRSS15	protein_coding	-1	gain
CNVR102	192739452	194386412	13	ENSSSCG00000020751	ENSSSCT00000022222	194369194	194369300	U6	snRNA	1	gain
CNVR102	192739452	194386412	13	ENSSSCG00000018241	ENSSSCT00000019836	194314383	194314488	U6	snRNA	-1	gain
CNVR104	195638599	197656323	13	ENSSSCG00000018744	ENSSSCT00000020339	196181306	196181409	U6	snRNA	1	both
CNVR105	198165206	199196126	13	ENSSSCG00000012021	ENSSSCT00000013152	199001550	199018936		protein_coding	-1	gain
CNVR105	198165206	199196126	13	ENSSSCG00000023028	ENSSSCT00000023520	199115876	199168012	JAM2	protein_coding	1	gain
CNVR105	198165206	199196126	13	ENSSSCG00000026479	ENSSSCT00000023447	199138367	199141529		protein_coding	-1	gain
CNVR105	198165206	199196126	13	ENSSSCG00000022586	ENSSSCT00000032099	199152403	199157934	ATP5J	protein_coding	-1	gain
CNVR105	198165206	199196126	13	ENSSSCG00000022632	ENSSSCT00000032188	199172158	199173832		protein_coding	1	gain
CNVR105	198165206	199196126	13	ENSSSCG00000018244	ENSSSCT00000019839	199016092	199016230	SNORA29	snoRNA	-1	gain
CNVR105	198165206	199196126	13	ENSSSCG00000019154	ENSSSCT00000020749	199063344	199063424	ssc-mir-155	miRNA	-1	gain
CNVR106	199308789	202728252	13	ENSSSCG00000012022	ENSSSCT00000013153	199291020	199568630	APP	protein_coding	-1	gain
CNVR106	199308789	202728252	13	ENSSSCG00000012026	ENSSSCT00000013158	200127201	200135726	ADAMTS1	protein_coding	-1	gain
CNVR106	199308789	202728252	13	ENSSSCG00000029488	ENSSSCT00000036599	200326440	200332110	ADAMTS1	protein_coding	1	gain
CNVR106	199308789	202728252	13	ENSSSCG00000012027	ENSSSCT00000013159	200405037	200449758	ADAMTS5	protein_coding	-1	gain
CNVR106	199308789	202728252	13	ENSSSCG00000029623	ENSSSCT00000012679	202514907	202515311		protein_coding	1	gain
CNVR106	199308789	202728252	13	ENSSSCG00000024051	ENSSSCT00000024840	202522698	202524332		protein_coding	-1	gain
CNVR106	199308789	202728252	13	ENSSSCG00000026046	ENSSSCT00000031237	202557997	202562029		protein_coding	1	gain
CNVR106	199308789	202728252	13	ENSSSCG00000030528	ENSSSCT00000030539	202598695	202660919	LTN1	protein_coding	-1	gain
CNVR106	199308789	202728252	13	ENSSSCG00000026581	ENSSSCT00000022733	202665421	202671448	RWDD2B	protein_coding	-1	gain
CNVR106	199308789	202728252	13	ENSSSCG00000027594	ENSSSCT00000029188	202679047	202709145	USP16	protein_coding	1	gain
CNVR106	199308789	202728252	13	ENSSSCG00000026761	ENSSSCT00000023076	202710194	202726027	CCT8	protein_coding	-1	gain
CNVR106	199308789	202728252	13	ENSSSCG00000026439	ENSSSCT00000028194	201245482	201245566		miRNA	-1	gain
CNVR106	199308789	202728252	13	ENSSSCG00000019480	ENSSSCT00000021075	200739347	200739451	U6	snRNA	-1	gain
CNVR106	199308789	202728252	13	ENSSSCG00000020922	ENSSSCT00000022533	201175948	201176032		miRNA	-1	gain
CNVR106	199308789	202728252	13	ENSSSCG00000019793	ENSSSCT00000021388	199351615	199351720	U6	snRNA	-1	gain
CNVR106	199308789	202728252	13	ENSSSCG00000027803	ENSSSCT00000029573	201138426	201138499		miRNA	-1	gain
CNVR106	199308789	202728252	13	ENSSSCG00000018726	ENSSSCT00000020321	200582545	200582680	SNORA51	snoRNA	-1	gain
CNVR106	199308789	202728252	13	ENSSSCG00000024159	ENSSSCT00000025809	199713646	199713752	U6	snRNA	-1	gain
CNVR107	203080799	205804998	13	ENSSSCG00000012029	ENSSSCT00000013161	203134183	203148106	BACH1	protein_coding	1	gain
CNVR107	203080799	205804998	13	ENSSSCG00000025119	ENSSSCT00000028121	203411536	203632118	GRIK1	protein_coding	-1	gain
CNVR107	203080799	205804998	13	ENSSSCG00000012031	ENSSSCT00000013163	204119207	204119884	CLDN17	protein_coding	-1	gain
CNVR107	203080799	205804998	13	ENSSSCG00000012030	ENSSSCT00000013162	204165895	204166572	CLDN8	protein_coding	-1	gain
CNVR107	203080799	205804998	13	ENSSSCG00000021804	ENSSSCT00000025496	204233893	204234681	KRTAP24-1	protein_coding	-1	gain
CNVR107	203080799	205804998	13	ENSSSCG00000028321	ENSSSCT00000030576	204269943	204270494	KRTAP26-1	protein_coding	-1	gain
CNVR107	203080799	205804998	13	ENSSSCG00000029297	ENSSSCT00000022683	204291475	204292104	KRTAP27-1	protein_coding	-1	gain
CNVR107	203080799	205804998	13	ENSSSCG00000028843	ENSSSCT00000032568	204658110	204658265		protein_coding	1	gain
CNVR107	203080799	205804998	13	ENSSSCG00000021087	ENSSSCT00000030868	204836039	204836218	KRTAP8-1	protein_coding	-1	gain
CNVR107	203080799	205804998	13	ENSSSCG00000027655	ENSSSCT00000023804	204856332	204856589	KRTAP7-1	protein_coding	-1	gain
CNVR107	203080799	205804998	13	ENSSSCG00000012034	ENSSSCT00000031132	205172409	205307822	TIAM1	protein_coding	-1	gain
CNVR107	203080799	205804998	13	ENSSSCG00000021355	ENSSSCT00000029514	205620986	205629933	SOD1	protein_coding	1	gain
CNVR107	203080799	205804998	13	ENSSSCG00000021023	ENSSSCT00000030551	205632459	205690752	SCAF4	protein_coding	-1	gain
CNVR107	203080799	205804998	13	ENSSSCG00000012032	ENSSSCT00000013164	203723967	203724125		pseudogene	-1	gain
CNVR107	203080799	205804998	13	ENSSSCG00000023224	ENSSSCT00000020619	205763642	205763735	U6	snRNA	1	gain
CNVR108	206171736	206389163	13	ENSSSCG00000021598	ENSSSCT00000027220	206119810	206185160	EVA1C	protein_coding	1	gain
CNVR108	206171736	206389163	13	ENSSSCG00000012036	ENSSSCT00000013168	206219931	206235889	C21orf59	protein_coding	-1	gain
CNVR108	206171736	206389163	13	ENSSSCG00000012035	ENSSSCT00000013167	206240521	206342084	SYNJ1	protein_coding	-1	gain
CNVR108	206171736	206389163	13	ENSSSCG00000012037	ENSSSCT00000013169	206348598	206383065	PAXBP1	protein_coding	-1	gain
CNVR108	206171736	206389163	13	ENSSSCG00000030094	ENSSSCT00000031983	206250003	206250109	U6	snRNA	-1	gain
CNVR109	206600113	207108562	13	ENSSSCG00000012040	ENSSSCT00000013172	206713880	206714722	OLIG1	protein_coding	-1	gain
CNVR109	206600113	207108562	13	ENSSSCG00000028192	ENSSSCT00000024359	206922280	206923693	DNAJC28	protein_coding	-1	gain
CNVR109	206600113	207108562	13	ENSSSCG00000030677	ENSSSCT00000022788	206941045	206971927	GART	protein_coding	-1	gain
CNVR109	206600113	207108562	13	ENSSSCG00000023674	ENSSSCT00000026483	206972801	207003183	SON	protein_coding	1	gain
CNVR109	206600113	207108562	13	ENSSSCG00000027089	ENSSSCT00000029073	207005112	207014612	DONSON	protein_coding	-1	gain
CNVR109	206600113	207108562	13	ENSSSCG00000028377	ENSSSCT00000030581	207015271	207077231	CRYZL1	protein_coding	-1	gain
CNVR109	206600113	207108562	13	ENSSSCG00000012039	ENSSSCT00000013171	206662841	206664067		pseudogene	1	gain
CNVR110	207771914	208077029	13	ENSSSCG00000012045	ENSSSCT00000013177	207808671	207809042	KCNE2	protein_coding	1	gain
CNVR110	207771914	208077029	13	ENSSSCG00000012046	ENSSSCT00000013178	207814283	207826833	SMIM11	protein_coding	1	gain
CNVR110	207771914	208077029	13	ENSSSCG00000012047	ENSSSCT00000013179	207836763	207837512	C21orf140	protein_coding	-1	gain
CNVR110	207771914	208077029	13	ENSSSCG00000012049	ENSSSCT00000013181	207880013	207880402		protein_coding	-1	gain
CNVR110	207771914	208077029	13	ENSSSCG00000012050	ENSSSCT00000013182	207934802	207945091	RCAN1	protein_coding	-1	gain
CNVR111	209155239	212757383	13	ENSSSCG00000027965	ENSSSCT00000027066	211406307	211406865		protein_coding	-1	both
CNVR111	209155239	212757383	13	ENSSSCG00000012065	ENSSSCT00000013197	211425052	211426026	KCNJ6	protein_coding	-1	both
CNVR111	209155239	212757383	13	ENSSSCG00000012066	ENSSSCT00000013198	212018091	212022237	KCNJ15	protein_coding	1	both
CNVR111	209155239	212757383	13	ENSSSCG00000022318	ENSSSCT00000023594	212084504	212156974	ERG	protein_coding	-1	both
CNVR111	209155239	212757383	13	ENSSSCG00000028883	ENSSSCT00000026968	209715199	209740460	SETD4	protein_coding	-1	both
CNVR111	209155239	212757383	13	ENSSSCG00000020706	ENSSSCT00000027272	209752044	209758486		protein_coding	1	both
CNVR111	209155239	212757383	13	ENSSSCG00000012053	ENSSSCT00000013185	209842576	209852620	CBR3	protein_coding	1	both
CNVR111	209155239	212757383	13	ENSSSCG00000012054	ENSSSCT00000013186	209860177	210009520	DOPEY2	protein_coding	1	both
CNVR111	209155239	212757383	13	ENSSSCG00000012055	ENSSSCT00000013187	210024234	210065080	MORC3	protein_coding	1	both
CNVR111	209155239	212757383	13	ENSSSCG00000012056	ENSSSCT00000013188	210075873	210099924	CHAF1B	protein_coding	1	both
CNVR111	209155239	212757383	13	ENSSSCG00000020680	ENSSSCT00000022282	210156655	210157374	CLDN14	protein_coding	-1	both
CNVR111	209155239	212757383	13	ENSSSCG00000027179	ENSSSCT00000025022	210439982	210478671	SIM2	protein_coding	1	both
CNVR111	209155239	212757383	13	ENSSSCG00000012059	ENSSSCT00000013191	210481700	210676682	HLCS	protein_coding	-1	both
CNVR111	209155239	212757383	13	ENSSSCG00000012060	ENSSSCT00000013192	210717869	210726747	RIPPLY3	protein_coding	1	both
CNVR111	209155239	212757383	13	ENSSSCG00000012061	ENSSSCT00000013193	210760407	210768763	PIGP	protein_coding	-1	both
CNVR111	209155239	212757383	13	ENSSSCG00000012062	ENSSSCT00000013194	210781584	210875732	TTC3	protein_coding	1	both
CNVR111	209155239	212757383	13	ENSSSCG00000020975	ENSSSCT00000030443	210806054	210817734		protein_coding	1	both
CNVR111	209155239	212757383	13	ENSSSCG00000012063	ENSSSCT00000013195	210992784	211046824	DSCR3	protein_coding	-1	both
CNVR111	209155239	212757383	13	ENSSSCG00000030480	ENSSSCT00000028889	211098174	211247977		protein_coding	1	both
CNVR111	209155239	212757383	13	ENSSSCG00000019614	ENSSSCT00000021209	211766577	211766708	SNORA72	snoRNA	1	both
CNVR111	209155239	212757383	13	ENSSSCG00000027172	ENSSSCT00000028926	209487890	209487982		miRNA	1	both
CNVR112	213446014	213545042	13	ENSSSCG00000012071	ENSSSCT00000013203	213446785	213480182	IGSF5	protein_coding	-1	loss
CNVR113	213691291	214465106	13	ENSSSCG00000012072	ENSSSCT00000013204	213656818	214029116	DSCAM	protein_coding	-1	gain
CNVR113	213691291	214465106	13	ENSSSCG00000022949	ENSSSCT00000031867	214134927	214142596		protein_coding	1	gain
CNVR114	215504606	215828463	13	ENSSSCG00000012084	ENSSSCT00000013218	215498995	215544157	PRDM15	protein_coding	-1	gain
CNVR114	215504606	215828463	13	ENSSSCG00000025821	ENSSSCT00000030786	215572917	215639734	C2CD2	protein_coding	-1	gain
CNVR114	215504606	215828463	13	ENSSSCG00000027786	ENSSSCT00000025689	215675712	215688081	ZBTB21	protein_coding	-1	gain
CNVR114	215504606	215828463	13	ENSSSCG00000022290	ENSSSCT00000023123	215760711	215826897	UMODL1	protein_coding	1	gain
CNVR115	216399345	217027218	13	ENSSSCG00000030016	ENSSSCT00000025792	216378408	216449518	PDE9A	protein_coding	1	gain
CNVR115	216399345	217027218	13	ENSSSCG00000022246	ENSSSCT00000023021	216984861	216994632	ICOSLG	protein_coding	-1	gain
CNVR115	216399345	217027218	13	ENSSSCG00000028741	ENSSSCT00000029563	216997925	217011817		protein_coding	-1	gain
CNVR115	216399345	217027218	13	ENSSSCG00000023078	ENSSSCT00000023709	216486411	216506233	WDR4	protein_coding	-1	gain
CNVR115	216399345	217027218	13	ENSSSCG00000026075	ENSSSCT00000025612	216486799	216493312		protein_coding	1	gain
CNVR115	216399345	217027218	13	ENSSSCG00000025997	ENSSSCT00000028961	216523110	216528836		protein_coding	1	gain
CNVR115	216399345	217027218	13	ENSSSCG00000021991	ENSSSCT00000025887	216572830	216576892		protein_coding	-1	gain
CNVR115	216399345	217027218	13	ENSSSCG00000021698	ENSSSCT00000028037	216628848	216647523	RRP1B	protein_coding	-1	gain
CNVR115	216399345	217027218	13	ENSSSCG00000022164	ENSSSCT00000025735	216653114	216696962	HSF2BP	protein_coding	1	gain
CNVR115	216399345	217027218	13	ENSSSCG00000028137	ENSSSCT00000031598	216759345	216764050		protein_coding	1	gain
CNVR115	216399345	217027218	13	ENSSSCG00000029627	ENSSSCT00000028839	216898157	216908948		protein_coding	1	gain
CNVR115	216399345	217027218	13	ENSSSCG00000025525	ENSSSCT00000025442	216919296	216928632		protein_coding	1	gain
CNVR115	216399345	217027218	13	ENSSSCG00000027940	ENSSSCT00000029732	216650134	216650250	SNORA70	snoRNA	-1	gain
CNVR118	59846756	59957359	14	ENSSSCG00000010152	ENSSSCT00000011116	59855558	59856037	GNG4	protein_coding	-1	gain
CNVR118	59846756	59957359	14	ENSSSCG00000010153	ENSSSCT00000011117	59874800	59894035	B3GALNT2	protein_coding	1	gain
CNVR118	59846756	59957359	14	ENSSSCG00000010154	ENSSSCT00000011118	59954696	59969076	TBCE	protein_coding	-1	gain
CNVR119	63336064	63401735	14	ENSSSCG00000010170	ENSSSCT00000011136	63329745	63441058	DISC1	protein_coding	-1	gain
CNVR120	69219662	69274225	14	ENSSSCG00000010213	ENSSSCT00000011179	69255561	69256325	PSMA5	protein_coding	-1	gain
CNVR120	69219662	69274225	14	ENSSSCG00000010214	ENSSSCT00000011180	69262319	69277262	CDC2	protein_coding	1	gain
CNVR125	140328757	140360858	14	ENSSSCG00000010676	ENSSSCT00000011677	140327293	140346983		protein_coding	1	loss
CNVR126	146585571	146637257	14	ENSSSCG00000010740	ENSSSCT00000011752	146602222	146617391	TEX36	protein_coding	-1	gain
CNVR131	31495864	31561161	15	ENSSSCG00000015726	ENSSSCT00000017126	31248003	31803163	CNTNAP5	protein_coding	-1	gain
CNVR134	139192454	139219567	15	ENSSSCG00000016233	ENSSSCT00000017676	139183910	139249592	PN-1	protein_coding	-1	gain
CNVR136	18897025	18930723	16	ENSSSCG00000030991	ENSSSCT00000036642	18897676	19288560	PDZD2	processed_transcript	1	gain
CNVR137	29016623	29058649	16	ENSSSCG00000016867	ENSSSCT00000018371	28995337	29021818	CCDC152	protein_coding	1	gain
CNVR137	29016623	29058649	16	ENSSSCG00000021208	ENSSSCT00000031007	29021315	29026496	SEPP1	protein_coding	-1	gain
CNVR138	44362264	44429692	16	ENSSSCG00000020281	ENSSSCT00000021876	44422852	44423217	RNaseP_nuc	misc_RNA	1	loss
CNVR139	71439338	71638433	16	ENSSSCG00000024721	ENSSSCT00000029282	71438516	71452568	LSM11	protein_coding	-1	gain
CNVR139	71439338	71638433	16	ENSSSCG00000017049	ENSSSCT00000018562	71456115	71462616	THG1L	protein_coding	-1	gain
CNVR139	71439338	71638433	16	ENSSSCG00000017051	ENSSSCT00000018564	71494419	71531636	SOX30	protein_coding	1	gain
CNVR139	71439338	71638433	16	ENSSSCG00000017052	ENSSSCT00000018565	71570441	71669557	ADAM19	protein_coding	1	gain
CNVR139	71439338	71638433	16	ENSSSCG00000028459	ENSSSCT00000030253	71616976	71617060		miRNA	-1	gain
CNVR139	71439338	71638433	16	ENSSSCG00000019667	ENSSSCT00000021262	71561135	71561238	U6	snRNA	1	gain
CNVR142	15175	249970	17	ENSSSCG00000006966	ENSSSCT00000007631	151830	152699	CLDN23	protein_coding	-1	gain
CNVR145	58450650	58531296	17	ENSSSCG00000030760	ENSSSCT00000033200	58503994	58516526	CH242-7P5.3	antisense	1	gain
CNVR145	58450650	58531296	17	ENSSSCG00000007469	ENSSSCT00000033093	58355133	58474149	PTPN1	protein_coding	1	gain
CNVR145	58450650	58531296	17	ENSSSCG00000007470	ENSSSCT00000026410	58476081	58509813	FAM65C	protein_coding	-1	gain
CNVR148	42108500	42219500	18	ENSSSCG00000027389	ENSSSCT00000024969	42190501	42212634		protein_coding	1	loss
CNVR150	124740	1280682	X	ENSSSCG00000012090	ENSSSCT00000013224	554638	563980	SHOX	protein_coding	1	gain
CNVR152	8672519	8718698	X	ENSSSCG00000012112	ENSSSCT00000035895	8472834	9213814	ARHGAP6	protein_coding	-1	loss
CNVR152	8672519	8718698	X	ENSSSCG00000012113	ENSSSCT00000013250	8669937	8677620	AMELX	protein_coding	1	loss
CNVR153	11345780	11443525	X	ENSSSCG00000012125	ENSSSCT00000034085	11319999	11369242	OFD1	protein_coding	1	gain
CNVR153	11345780	11443525	X	ENSSSCG00000012126	ENSSSCT00000013265	11383151	11536112	GPM6B	protein_coding	-1	gain
CNVR155	27092597	28389686	X	ENSSSCG00000030086	ENSSSCT00000029399	27254911	27350586		protein_coding	-1	gain
CNVR155	27092597	28389686	X	ENSSSCG00000028114	ENSSSCT00000024861	27279599	27282366		protein_coding	1	gain
CNVR155	27092597	28389686	X	ENSSSCG00000021452	ENSSSCT00000031948	27486717	27489484		protein_coding	-1	gain
CNVR155	27092597	28389686	X	ENSSSCG00000012196	ENSSSCT00000013341	28024042	28068942	IL1RAPL1	protein_coding	1	gain
CNVR155	27092597	28389686	X	ENSSSCG00000012197	ENSSSCT00000013342	28294877	28295911		protein_coding	1	gain
CNVR155	27092597	28389686	X	ENSSSCG00000012198	ENSSSCT00000013343	28320171	28321211	MAGEB3	protein_coding	1	gain
CNVR155	27092597	28389686	X	ENSSSCG00000028214	ENSSSCT00000030002	28341520	28342557		protein_coding	1	gain
CNVR155	27092597	28389686	X	ENSSSCG00000012199	ENSSSCT00000013344	28384122	28389200	DAX-1	protein_coding	-1	gain
CNVR155	27092597	28389686	X	ENSSSCG00000024730	ENSSSCT00000026433	28193680	28193743		miRNA	1	gain
CNVR156	30562520	30747961	X	ENSSSCG00000028148	ENSSSCT00000029079	29401752	31958390	DMD	protein_coding	-1	gain
CNVR157	32076524	34472337	X	ENSSSCG00000031029	ENSSSCT00000034813	32223757	32224877	CH242-130J23.1	pseudogene	1	gain
CNVR157	32076524	34472337	X	ENSSSCG00000012212	ENSSSCT00000013358	33719139	33719787	CH242-117I7.1	pseudogene	1	gain
CNVR157	32076524	34472337	X	ENSSSCG00000012213	ENSSSCT00000028420	33725851	33729226	CH242-117I7.3	pseudogene	1	gain
CNVR157	32076524	34472337	X	ENSSSCG00000031062	ENSSSCT00000035886	33806824	33807999	CH242-117I7.2	pseudogene	1	gain
CNVR157	32076524	34472337	X	ENSSSCG00000030837	ENSSSCT00000036456	33824222	33824950	CH242-117I7.4	pseudogene	-1	gain
CNVR157	32076524	34472337	X	ENSSSCG00000030979	ENSSSCT00000034278	34028817	34029871	CH242-88A7.1	pseudogene	-1	gain
CNVR157	32076524	34472337	X	ENSSSCG00000012215	ENSSSCT00000013361	34070551	34072289	CH242-88A7.2	pseudogene	-1	gain
CNVR157	32076524	34472337	X	ENSSSCG00000030863	ENSSSCT00000034798	34372802	34373110	CH242-57E23.2	pseudogene	1	gain
CNVR157	32076524	34472337	X	ENSSSCG00000024132	ENSSSCT00000023522	33945786	33976585	TMEM47	protein_coding	-1	gain
CNVR157	32076524	34472337	X	ENSSSCG00000012216	ENSSSCT00000013362	34366878	34370540	CH242-57E23.1	protein_coding	1	gain
CNVR158	46683760	46763140	X	ENSSSCG00000030912	ENSSSCT00000034666	46709253	46709481	PigE-4L18.6	pseudogene	1	gain
CNVR158	46683760	46763140	X	ENSSSCG00000012272	ENSSSCT00000013420	46689868	46703702	ZNF157	protein_coding	-1	gain
CNVR158	46683760	46763140	X	ENSSSCG00000012273	ENSSSCT00000033556	46746252	46760931	USP11	protein_coding	-1	gain
CNVR159	47951941	48308192	X	ENSSSCG00000030753	ENSSSCT00000036516	47990465	47992389	CH242-247J8.3	non_coding	-1	gain
CNVR159	47951941	48308192	X	ENSSSCG00000012298	ENSSSCT00000035358	48099241	48131997	CACNA1F	processed_transcript	-1	gain
CNVR159	47951941	48308192	X	ENSSSCG00000012294	ENSSSCT00000032932	48063314	48066260	PLP2	protein_coding	1	gain
CNVR159	47951941	48308192	X	ENSSSCG00000012293	ENSSSCT00000013442	48066375	48078264	PRICKLE3	protein_coding	-1	gain
CNVR159	47951941	48308192	X	ENSSSCG00000012292	ENSSSCT00000034645	48080132	48094633	SYP	protein_coding	-1	gain
CNVR159	47951941	48308192	X	ENSSSCG00000012297	ENSSSCT00000035107	48133200	48151807	CCDC22	protein_coding	1	gain
CNVR159	47951941	48308192	X	ENSSSCG00000012300	ENSSSCT00000013449	48151826	48170815	FOXP3	protein_coding	-1	gain
CNVR159	47951941	48308192	X	ENSSSCG00000022584	ENSSSCT00000035921	48175749	48192437	PPP1R3F	protein_coding	1	gain
CNVR159	47951941	48308192	X	ENSSSCG00000028340	ENSSSCT00000029010	48208003	48221079		protein_coding	1	gain
CNVR159	47951941	48308192	X	ENSSSCG00000012287	ENSSSCT00000035448	47948307	47964288	TFE3	protein_coding	-1	gain
CNVR159	47951941	48308192	X	ENSSSCG00000012288	ENSSSCT00000013437	47976918	47994738	CCDC120	protein_coding	1	gain
CNVR159	47951941	48308192	X	ENSSSCG00000012289	ENSSSCT00000035198	47995413	47998350	PRAF2	protein_coding	-1	gain
CNVR159	47951941	48308192	X	ENSSSCG00000030995	ENSSSCT00000032822	47995680	47999858	CH242-247J8.11	protein_coding	-1	gain
CNVR159	47951941	48308192	X	ENSSSCG00000012290	ENSSSCT00000036201	47998631	48004136	WDR45	protein_coding	-1	gain
CNVR159	47951941	48308192	X	ENSSSCG00000012291	ENSSSCT00000013440	48024601	48039758	GPKOW	protein_coding	-1	gain
CNVR159	47951941	48308192	X	ENSSSCG00000012295	ENSSSCT00000035012	48055004	48059583	MAGIX	protein_coding	1	gain
CNVR160	52288809	55073511	X	ENSSSCG00000030919	ENSSSCT00000033525	52525974	52686212	FAM120C	processed_transcript	-1	gain
CNVR160	52288809	55073511	X	ENSSSCG00000029757	ENSSSCT00000025577	53143460	53144390	CH242-193E13.5	pseudogene	-1	gain
CNVR160	52288809	55073511	X	ENSSSCG00000030925	ENSSSCT00000034340	53168498	53170103	CH242-193E13.1	pseudogene	1	gain
CNVR160	52288809	55073511	X	ENSSSCG00000031007	ENSSSCT00000032663	53227520	53228321	CH242-193E13.3	pseudogene	-1	gain
CNVR160	52288809	55073511	X	ENSSSCG00000031045	ENSSSCT00000034711	54080960	54081698	CH242-152I6.3	pseudogene	-1	gain
CNVR160	52288809	55073511	X	ENSSSCG00000030964	ENSSSCT00000034360	54310032	54310458	CH242-152I6.4	pseudogene	1	gain
CNVR160	52288809	55073511	X	ENSSSCG00000012346	ENSSSCT00000013501	53852224	53856059	PAGE2B	protein_coding	1	gain
CNVR160	52288809	55073511	X	ENSSSCG00000012349	ENSSSCT00000034835	54046888	54049941	USP51	protein_coding	1	gain
CNVR160	52288809	55073511	X	ENSSSCG00000012350	ENSSSCT00000013505	54057688	54059104	MAGEH1	protein_coding	-1	gain
CNVR160	52288809	55073511	X	ENSSSCG00000029800	ENSSSCT00000027537	54154920	54165935		protein_coding	-1	gain
CNVR160	52288809	55073511	X	ENSSSCG00000024025	ENSSSCT00000031732	54221716	54232414		protein_coding	1	gain
CNVR160	52288809	55073511	X	ENSSSCG00000020805	ENSSSCT00000022426	54301872	54302819	FOXR2	protein_coding	-1	gain
CNVR160	52288809	55073511	X	ENSSSCG00000027095	ENSSSCT00000030414	54490994	54501938		protein_coding	-1	gain
CNVR160	52288809	55073511	X	ENSSSCG00000024842	ENSSSCT00000024645	54556410	54567130		protein_coding	1	gain
CNVR160	52288809	55073511	X	ENSSSCG00000012352	ENSSSCT00000013507	54906627	54926706	KLF8	protein_coding	-1	gain
CNVR160	52288809	55073511	X	ENSSSCG00000012329	ENSSSCT00000013482	52130285	52306498	PHF8	protein_coding	-1	gain
CNVR160	52288809	55073511	X	ENSSSCG00000021316	ENSSSCT00000013484	52471202	52471465		protein_coding	1	gain
CNVR160	52288809	55073511	X	ENSSSCG00000012330	ENSSSCT00000013483	52506475	52688855	FAM120C	protein_coding	-1	gain
CNVR160	52288809	55073511	X	ENSSSCG00000012332	ENSSSCT00000013486	52778883	52912100	WNK3	protein_coding	-1	gain
CNVR160	52288809	55073511	X	ENSSSCG00000012334	ENSSSCT00000013488	53043934	53049407	TSR2	protein_coding	1	gain
CNVR160	52288809	55073511	X	ENSSSCG00000012335	ENSSSCT00000034095	53049373	53088165	FGD1	protein_coding	-1	gain
CNVR160	52288809	55073511	X	ENSSSCG00000012336	ENSSSCT00000013490	53113293	53141323	GNL3L	protein_coding	1	gain
CNVR160	52288809	55073511	X	ENSSSCG00000012342	ENSSSCT00000013496	53361029	53369059	MAGED2	protein_coding	1	gain
CNVR160	52288809	55073511	X	ENSSSCG00000023152	ENSSSCT00000024233	53415578	53416953		protein_coding	-1	gain
CNVR160	52288809	55073511	X	ENSSSCG00000012344	ENSSSCT00000013498	53537798	53539564	TROP	protein_coding	-1	gain
CNVR160	52288809	55073511	X	ENSSSCG00000028313	ENSSSCT00000031235	53542554	53543284		protein_coding	-1	gain
CNVR160	52288809	55073511	X	ENSSSCG00000024234	ENSSSCT00000030685	53545287	53545955		protein_coding	-1	gain
CNVR160	52288809	55073511	X	ENSSSCG00000024814	ENSSSCT00000026514	53702921	53708132	TROP	protein_coding	1	gain
CNVR160	52288809	55073511	X	ENSSSCG00000012345	ENSSSCT00000034212	53709533	53795125	PFKFB1	protein_coding	-1	gain
CNVR160	52288809	55073511	X	ENSSSCG00000012348	ENSSSCT00000035798	53798837	53806711	APEX2	protein_coding	1	gain
CNVR160	52288809	55073511	X	ENSSSCG00000012347	ENSSSCT00000032826	53807665	53832133	ALAS2	protein_coding	-1	gain
CNVR160	52288809	55073511	X	ENSSSCG00000020264	ENSSSCT00000021859	52308260	52308360	U6	snRNA	1	gain
CNVR160	52288809	55073511	X	ENSSSCG00000027316	ENSSSCT00000029074	53881538	53881644	U6	snRNA	1	gain
CNVR160	52288809	55073511	X	ENSSSCG00000018326	ENSSSCT00000019921	53367512	53367639	SNORA11	snoRNA	1	gain
CNVR160	52288809	55073511	X	ENSSSCG00000023634	ENSSSCT00000019741	53004613	53004719	U6	snRNA	-1	gain
CNVR160	52288809	55073511	X	ENSSSCG00000020461	ENSSSCT00000022056	54752511	54752651	SNORA74	snoRNA	-1	gain
CNVR160	52288809	55073511	X	ENSSSCG00000024469	ENSSSCT00000021064	53540863	53540991	SNORA11	snoRNA	-1	gain
CNVR160	52288809	55073511	X	ENSSSCG00000019302	ENSSSCT00000020897	53763251	53763348	U6	snRNA	1	gain
CNVR160	52288809	55073511	X	ENSSSCG00000025158	ENSSSCT00000021583	53704534	53704662	SNORA11	snoRNA	1	gain
CNVR161	57672454	62086511	X	ENSSSCG00000030887	ENSSSCT00000032941	61053045	61053192	CH242-257M5.2	pseudogene	-1	gain
CNVR161	57672454	62086511	X	ENSSSCG00000027657	ENSSSCT00000032193	57673576	57710448	ZC4H2	protein_coding	-1	gain
CNVR161	57672454	62086511	X	ENSSSCG00000012367	ENSSSCT00000013524	58099720	58368203	ZC3H12B	protein_coding	1	gain
CNVR161	57672454	62086511	X	ENSSSCG00000012366	ENSSSCT00000013523	58376615	58402428	LAS1L	protein_coding	-1	gain
CNVR161	57672454	62086511	X	ENSSSCG00000012365	ENSSSCT00000013522	58473229	58596671	MSN	protein_coding	1	gain
CNVR161	57672454	62086511	X	ENSSSCG00000028241	ENSSSCT00000027782	58756065	58763172	VSIG4	protein_coding	-1	gain
CNVR161	57672454	62086511	X	ENSSSCG00000012364	ENSSSCT00000013521	58774511	58776353	VSIG4	protein_coding	1	gain
CNVR161	57672454	62086511	X	ENSSSCG00000012363	ENSSSCT00000013520	58894678	58976654	HEPH	protein_coding	1	gain
CNVR161	57672454	62086511	X	ENSSSCG00000026683	ENSSSCT00000028435	59064360	59065250		protein_coding	-1	gain
CNVR161	57672454	62086511	X	ENSSSCG00000012371	ENSSSCT00000013528	60313335	60504856	AR	protein_coding	1	gain
CNVR161	57672454	62086511	X	ENSSSCG00000025348	ENSSSCT00000025057	60818903	60915170		protein_coding	-1	gain
CNVR161	57672454	62086511	X	ENSSSCG00000022676	ENSSSCT00000030679	61016381	61097867	OPHN1	protein_coding	-1	gain
CNVR161	57672454	62086511	X	ENSSSCG00000012829	ENSSSCT00000014023	61532033	61553611		protein_coding	1	gain
CNVR161	57672454	62086511	X	ENSSSCG00000012830	ENSSSCT00000014024	61682350	61683308		protein_coding	1	gain
CNVR161	57672454	62086511	X	ENSSSCG00000028336	ENSSSCT00000030519	61698893	61724778		protein_coding	1	gain
CNVR161	57672454	62086511	X	ENSSSCG00000012828	ENSSSCT00000014022	61990606	61996411	STARD8	protein_coding	1	gain
CNVR161	57672454	62086511	X	ENSSSCG00000020253	ENSSSCT00000021848	58890681	58890789	U6	snRNA	-1	gain
CNVR161	57672454	62086511	X	ENSSSCG00000020233	ENSSSCT00000021828	58982608	58982789	7SK	misc_RNA	1	gain
CNVR161	57672454	62086511	X	ENSSSCG00000021167	ENSSSCT00000022778	57894191	57894318	SNORD22	snoRNA	1	gain
CNVR161	57672454	62086511	X	ENSSSCG00000019401	ENSSSCT00000020996	58752406	58752517		miRNA	1	gain
CNVR162	64571859	64882657	X	ENSSSCG00000030982	ENSSSCT00000035210	64590993	64591292	CH242-6A14.7	pseudogene	-1	gain
CNVR162	64571859	64882657	X	ENSSSCG00000012392	ENSSSCT00000036403	64781424	64782000	CH242-239N4.3	pseudogene	-1	gain
CNVR162	64571859	64882657	X	ENSSSCG00000030944	ENSSSCT00000034262	64829323	64829830	CH242-239N4.4	pseudogene	1	gain
CNVR162	64571859	64882657	X	ENSSSCG00000031020	ENSSSCT00000036256	64855955	64856384	CH242-239N4.2	pseudogene	1	gain
CNVR162	64571859	64882657	X	ENSSSCG00000012400	ENSSSCT00000036115	64630298	64639396	SNX12	protein_coding	-1	gain
CNVR162	64571859	64882657	X	ENSSSCG00000012399	ENSSSCT00000036657	64662674	64670530	FOXO4	protein_coding	1	gain
CNVR162	64571859	64882657	X	ENSSSCG00000030796	ENSSSCT00000033334	64670990	64673296	CXorf65	protein_coding	-1	gain
CNVR162	64571859	64882657	X	ENSSSCG00000012397	ENSSSCT00000033439	64673721	64677978	IL2RG	protein_coding	-1	gain
CNVR162	64571859	64882657	X	ENSSSCG00000012396	ENSSSCT00000013554	64681019	64704523	MED12	protein_coding	1	gain
CNVR162	64571859	64882657	X	ENSSSCG00000012395	ENSSSCT00000013553	64706246	64727650		protein_coding	1	gain
CNVR162	64571859	64882657	X	ENSSSCG00000024163	ENSSSCT00000027814	64829676	64832213	ZMYM3	protein_coding	1	gain
CNVR162	64571859	64882657	X	ENSSSCG00000012394	ENSSSCT00000032791	64844646	64852108	GJB1	protein_coding	-1	gain
CNVR162	64571859	64882657	X	ENSSSCG00000028532	ENSSSCT00000030328	64703549	64703668		miRNA	1	gain
CNVR163	67528213	75703473	X	ENSSSCG00000012427	ENSSSCT00000013588	69086891	69087469		pseudogene	-1	gain
CNVR163	67528213	75703473	X	ENSSSCG00000012431	ENSSSCT00000013592	69595718	69596455		pseudogene	-1	gain
CNVR163	67528213	75703473	X	ENSSSCG00000030914	ENSSSCT00000035944	69773656	69775159	CH242-22N6.1	pseudogene	1	gain
CNVR163	67528213	75703473	X	ENSSSCG00000030773	ENSSSCT00000035999	70391449	70474604	CH242-77E21.3	non_coding	1	gain
CNVR163	67528213	75703473	X	ENSSSCG00000030886	ENSSSCT00000035765	71041112	71041421	CH242-477H4.2	pseudogene	-1	gain
CNVR163	67528213	75703473	X	ENSSSCG00000030774	ENSSSCT00000035231	71058228	71058564	CH242-477H4.3	pseudogene	1	gain
CNVR163	67528213	75703473	X	ENSSSCG00000012441	ENSSSCT00000013606	71092369	71094028		pseudogene	1	gain
CNVR163	67528213	75703473	X	ENSSSCG00000030832	ENSSSCT00000032680	71200453	71200993	CH242-173B9.3	pseudogene	1	gain
CNVR163	67528213	75703473	X	ENSSSCG00000030852	ENSSSCT00000035447	71263446	71266898	CH242-173B9.4	pseudogene	1	gain
CNVR163	67528213	75703473	X	ENSSSCG00000030968	ENSSSCT00000033847	71287598	71288870	CH242-173B9.5	pseudogene	-1	gain
CNVR163	67528213	75703473	X	ENSSSCG00000024448	ENSSSCT00000029536	71813713	71816052	CH242-52A15.2	pseudogene	-1	gain
CNVR163	67528213	75703473	X	ENSSSCG00000030981	ENSSSCT00000032909	72818864	72819473	CH242-14J15.1	pseudogene	-1	gain
CNVR163	67528213	75703473	X	ENSSSCG00000031044	ENSSSCT00000033627	73384765	73385115	CH242-247O11.2	pseudogene	-1	gain
CNVR163	67528213	75703473	X	ENSSSCG00000025156	ENSSSCT00000031239	73863914	74026485	CH242-123K13.1	pseudogene	-1	gain
CNVR163	67528213	75703473	X	ENSSSCG00000030851	ENSSSCT00000033769	74066972	74069705	CH242-238J6.1	pseudogene	-1	gain
CNVR163	67528213	75703473	X	ENSSSCG00000031063	ENSSSCT00000033022	74377847	74379106	CH242-270H1.2	pseudogene	-1	gain
CNVR163	67528213	75703473	X	ENSSSCG00000020977	ENSSSCT00000031317	74389847	74404857	SH3BGRL	processed_transcript	-1	gain
CNVR163	67528213	75703473	X	ENSSSCG00000030956	ENSSSCT00000034501	75597653	75599872	CH242-228F19.1	pseudogene	1	gain
CNVR163	67528213	75703473	X	ENSSSCG00000012449	ENSSSCT00000034804	73272832	73280739		protein_coding	1	gain
CNVR163	67528213	75703473	X	ENSSSCG00000012450	ENSSSCT00000013616	73814259	73815431	FAM46D	protein_coding	-1	gain
CNVR163	67528213	75703473	X	ENSSSCG00000012425	ENSSSCT00000033503	68687968	68709137	UPRT	protein_coding	1	gain
CNVR163	67528213	75703473	X	ENSSSCG00000012452	ENSSSCT00000013618	74225141	74239655	SH3BGRL	protein_coding	-1	gain
CNVR163	67528213	75703473	X	ENSSSCG00000012426	ENSSSCT00000013587	68882475	69045188	ZDHHC15	protein_coding	-1	gain
CNVR163	67528213	75703473	X	ENSSSCG00000012430	ENSSSCT00000013591	69272221	69273417		protein_coding	-1	gain
CNVR163	67528213	75703473	X	ENSSSCG00000030577	ENSSSCT00000031316	69304924	69317294	PBDC1	protein_coding	-1	gain
CNVR163	67528213	75703473	X	ENSSSCG00000021054	ENSSSCT00000027012	70165759	70173292		protein_coding	1	gain
CNVR163	67528213	75703473	X	ENSSSCG00000029017	ENSSSCT00000031834	70196287	70204685		protein_coding	-1	gain
CNVR163	67528213	75703473	X	ENSSSCG00000022833	ENSSSCT00000030963	70359020	70368401	FGF16	protein_coding	1	gain
CNVR163	67528213	75703473	X	ENSSSCG00000012434	ENSSSCT00000013595	70390623	70790550		protein_coding	-1	gain
CNVR163	67528213	75703473	X	ENSSSCG00000012433	ENSSSCT00000013594	70617251	70625651		protein_coding	1	gain
CNVR163	67528213	75703473	X	ENSSSCG00000012435	ENSSSCT00000013598	70812442	70877254	MAGT1	protein_coding	-1	gain
CNVR163	67528213	75703473	X	ENSSSCG00000030970	ENSSSCT00000035991	70881166	70887766	COX7B	protein_coding	1	gain
CNVR163	67528213	75703473	X	ENSSSCG00000012437	ENSSSCT00000013601	70943081	71025990	ATP7A	protein_coding	1	gain
CNVR163	67528213	75703473	X	ENSSSCG00000012439	ENSSSCT00000013603	71117451	71117970		protein_coding	1	gain
CNVR163	67528213	75703473	X	ENSSSCG00000026714	ENSSSCT00000023290	71321308	71342676	TAF9B	protein_coding	1	gain
CNVR163	67528213	75703473	X	ENSSSCG00000012440	ENSSSCT00000013604	71339754	71352751	PGK1	protein_coding	-1	gain
CNVR163	67528213	75703473	X	ENSSSCG00000012443	ENSSSCT00000013608	71481819	71482841	CYSLTR1	protein_coding	-1	gain
CNVR163	67528213	75703473	X	ENSSSCG00000012445	ENSSSCT00000013611	71950225	71962479	LPAR4	protein_coding	1	gain
CNVR163	67528213	75703473	X	ENSSSCG00000012446	ENSSSCT00000033817	72343324	72359036	P2Y10	protein_coding	1	gain
CNVR163	67528213	75703473	X	ENSSSCG00000030020	ENSSSCT00000031915	72545720	72546721		protein_coding	1	gain
CNVR163	67528213	75703473	X	ENSSSCG00000021734	ENSSSCT00000023362	72635874	72638570	GPR174	protein_coding	-1	gain
CNVR163	67528213	75703473	X	ENSSSCG00000012448	ENSSSCT00000013614	72699045	72706320	ITM2A	protein_coding	-1	gain
CNVR163	67528213	75703473	X	ENSSSCG00000029458	ENSSSCT00000030528	67805548	67819648		protein_coding	1	gain
CNVR163	67528213	75703473	X	ENSSSCG00000012419	ENSSSCT00000013579	67853611	67878794		protein_coding	-1	gain
CNVR163	67528213	75703473	X	ENSSSCG00000020747	ENSSSCT00000024196	68034926	68049020		protein_coding	1	gain
CNVR163	67528213	75703473	X	ENSSSCG00000028538	ENSSSCT00000030994	68080063	68108403		protein_coding	-1	gain
CNVR163	67528213	75703473	X	ENSSSCG00000021754	ENSSSCT00000030966	68161941	68168038		protein_coding	-1	gain
CNVR163	67528213	75703473	X	ENSSSCG00000025929	ENSSSCT00000013584	68180431	68186528		protein_coding	-1	gain
CNVR163	67528213	75703473	X	ENSSSCG00000012424	ENSSSCT00000032985	68396333	68522004	ABCB7	protein_coding	-1	gain
CNVR163	67528213	75703473	X	ENSSSCG00000021589	ENSSSCT00000023227	75425132	75425389	7SK	misc_RNA	-1	gain
CNVR163	67528213	75703473	X	ENSSSCG00000026464	ENSSSCT00000019985	69436727	69436820	ssc-mir-325	miRNA	1	gain
CNVR163	67528213	75703473	X	ENSSSCG00000026245	ENSSSCT00000020781	69673008	69673101	ssc-mir-325	miRNA	-1	gain
CNVR163	67528213	75703473	X	ENSSSCG00000024178	ENSSSCT00000025822	73458415	73458521	U6	snRNA	-1	gain
CNVR163	67528213	75703473	X	ENSSSCG00000022100	ENSSSCT00000023716	74030029	74030135	U6	snRNA	-1	gain
CNVR163	67528213	75703473	X	ENSSSCG00000018719	ENSSSCT00000020314	67530361	67530440	ssc-mir-374a	miRNA	-1	gain
CNVR163	67528213	75703473	X	ENSSSCG00000025552	ENSSSCT00000027253	73248297	73248403	U6	snRNA	1	gain
CNVR163	67528213	75703473	X	ENSSSCG00000030499	ENSSSCT00000032371	68294301	68294390		miRNA	1	gain
CNVR163	67528213	75703473	X	ENSSSCG00000018346	ENSSSCT00000019941	69515826	69515913		miRNA	1	gain
CNVR163	67528213	75703473	X	ENSSSCG00000019673	ENSSSCT00000021268	67530183	67530288	ssc-mir-545	miRNA	-1	gain
CNVR164	78000797	84984929	X	ENSSSCG00000030962	ENSSSCT00000033706	78698220	78698679	CH242-250A21.1	pseudogene	-1	gain
CNVR164	78000797	84984929	X	ENSSSCG00000031015	ENSSSCT00000034485	78754236	78756373	CH242-33O21.2	lincRNA	-1	gain
CNVR164	78000797	84984929	X	ENSSSCG00000030794	ENSSSCT00000034187	79961475	79963380	CH242-91O1.2	pseudogene	1	gain
CNVR164	78000797	84984929	X	ENSSSCG00000030807	ENSSSCT00000032719	80786415	80787258	CH242-289H11.1	pseudogene	1	gain
CNVR164	78000797	84984929	X	ENSSSCG00000030895	ENSSSCT00000035828	81222066	81223908	CH242-157F23.1	pseudogene	-1	gain
CNVR164	78000797	84984929	X	ENSSSCG00000030734	ENSSSCT00000033342	81465744	81466835	CH242-151C9.2	pseudogene	-1	gain
CNVR164	78000797	84984929	X	ENSSSCG00000031043	ENSSSCT00000034546	81868745	81869741	CH242-208M4.1	pseudogene	1	gain
CNVR164	78000797	84984929	X	ENSSSCG00000012470	ENSSSCT00000013637	82616706	82617024	CH242-247N16.2	pseudogene	1	gain
CNVR164	78000797	84984929	X	ENSSSCG00000031016	ENSSSCT00000036067	82673797	82674052	CH242-247N16.1	pseudogene	-1	gain
CNVR164	78000797	84984929	X	ENSSSCG00000030946	ENSSSCT00000034231	83124849	83126058	CH242-112O1.1	pseudogene	1	gain
CNVR164	78000797	84984929	X	ENSSSCG00000027260	ENSSSCT00000026737	83277438	83279004		pseudogene	1	gain
CNVR164	78000797	84984929	X	ENSSSCG00000029112	ENSSSCT00000027829	83502960	83504526		pseudogene	1	gain
CNVR164	78000797	84984929	X	ENSSSCG00000030980	ENSSSCT00000036166	83543676	83544153	CH242-184K14.2	pseudogene	-1	gain
CNVR164	78000797	84984929	X	ENSSSCG00000030891	ENSSSCT00000032702	84298975	84299941	CH242-132M16.1	pseudogene	1	gain
CNVR164	78000797	84984929	X	ENSSSCG00000012473	ENSSSCT00000013640	84451270	84452448	CH242-320P11.1	pseudogene	1	gain
CNVR164	78000797	84984929	X	ENSSSCG00000012459	ENSSSCT00000013625	78031562	78104740	APOOL	protein_coding	1	gain
CNVR164	78000797	84984929	X	ENSSSCG00000023546	ENSSSCT00000029661	78195596	78244129		protein_coding	1	gain
CNVR164	78000797	84984929	X	ENSSSCG00000024291	ENSSSCT00000025018	78284663	78301669	APOOL	protein_coding	1	gain
CNVR164	78000797	84984929	X	ENSSSCG00000021601	ENSSSCT00000025975	78308051	78323748	ZNF711	protein_coding	1	gain
CNVR164	78000797	84984929	X	ENSSSCG00000012462	ENSSSCT00000013628	78329158	78402682	POF1B	protein_coding	-1	gain
CNVR164	78000797	84984929	X	ENSSSCG00000012463	ENSSSCT00000013630	78754167	79243045	CHM	protein_coding	-1	gain
CNVR164	78000797	84984929	X	ENSSSCG00000021256	ENSSSCT00000013632	80592289	80592691		protein_coding	1	gain
CNVR164	78000797	84984929	X	ENSSSCG00000029941	ENSSSCT00000017102	80723794	80724196		protein_coding	-1	gain
CNVR164	78000797	84984929	X	ENSSSCG00000012467	ENSSSCT00000013634	80884837	81001424	KLHL4	protein_coding	1	gain
CNVR164	78000797	84984929	X	ENSSSCG00000012469	ENSSSCT00000013636	81530173	81530616		protein_coding	1	gain
CNVR164	78000797	84984929	X	ENSSSCG00000012471	ENSSSCT00000013638	83504659	83504931		protein_coding	1	gain
CNVR164	78000797	84984929	X	ENSSSCG00000019895	ENSSSCT00000021490	78804780	78804859	ssc-mir-361	miRNA	-1	gain
CNVR164	78000797	84984929	X	ENSSSCG00000021788	ENSSSCT00000023413	84969193	84969299	U6	snRNA	1	gain
CNVR164	78000797	84984929	X	ENSSSCG00000020102	ENSSSCT00000021697	79781400	79781507	U6	snRNA	-1	gain
CNVR165	86201492	86419002	X	ENSSSCG00000030869	ENSSSCT00000035686	86397408	86397744	CH242-210O13.1	pseudogene	1	gain
CNVR165	86201492	86419002	X	ENSSSCG00000012474	ENSSSCT00000013641	85891071	86317742	DIAPH2	protein_coding	1	gain
CNVR165	86201492	86419002	X	ENSSSCG00000027552	ENSSSCT00000028335	86412496	86693109		protein_coding	1	gain
CNVR166	87901203	92882230	X	ENSSSCG00000012487	ENSSSCT00000013654	90542798	90558711	XKRX	protein_coding	-1	gain
CNVR166	87901203	92882230	X	ENSSSCG00000012488	ENSSSCT00000013655	90597958	90612592	ARL13A	protein_coding	1	gain
CNVR166	87901203	92882230	X	ENSSSCG00000024086	ENSSSCT00000013642	88388486	88389114	CH242-156E5.1	pseudogene	1	gain
CNVR166	87901203	92882230	X	ENSSSCG00000030787	ENSSSCT00000033689	89250732	89252461	CH242-51E15.1	pseudogene	-1	gain
CNVR166	87901203	92882230	X	ENSSSCG00000030746	ENSSSCT00000036548	90370984	90377689	CH242-34M18.2	pseudogene	-1	gain
CNVR166	87901203	92882230	X	ENSSSCG00000012507	ENSSSCT00000013675	91616774	91618858	CH242-102I9.1	pseudogene	1	gain
CNVR166	87901203	92882230	X	ENSSSCG00000012491	ENSSSCT00000013658	90692348	90742570	CENPI	protein_coding	-1	gain
CNVR166	87901203	92882230	X	ENSSSCG00000030628	ENSSSCT00000013674	92278454	92278840	CH242-203F13.1	pseudogene	1	gain
CNVR166	87901203	92882230	X	ENSSSCG00000012490	ENSSSCT00000013657	90744039	90757439	TMEM35	protein_coding	-1	gain
CNVR166	87901203	92882230	X	ENSSSCG00000012489	ENSSSCT00000013656	90777338	90808523	TRMT2B	protein_coding	1	gain
CNVR166	87901203	92882230	X	ENSSSCG00000012492	ENSSSCT00000013659	90904330	90958270	DRP2	protein_coding	1	gain
CNVR166	87901203	92882230	X	ENSSSCG00000012493	ENSSSCT00000032946	90962646	90983450	TAF7L	protein_coding	-1	gain
CNVR166	87901203	92882230	X	ENSSSCG00000012494	ENSSSCT00000034770	91010563	91013453	TIMM8A	protein_coding	-1	gain
CNVR166	87901203	92882230	X	ENSSSCG00000012495	ENSSSCT00000033373	91014292	91037097	BTK	protein_coding	-1	gain
CNVR166	87901203	92882230	X	ENSSSCG00000027066	ENSSSCT00000013644	88797364	88797627		protein_coding	1	gain
CNVR166	87901203	92882230	X	ENSSSCG00000012479	ENSSSCT00000013646	89912424	89992762	PCDH19	protein_coding	-1	gain
CNVR166	87901203	92882230	X	ENSSSCG00000012480	ENSSSCT00000013647	90109086	90132703	TNMD	protein_coding	1	gain
CNVR166	87901203	92882230	X	ENSSSCG00000012481	ENSSSCT00000035122	90165031	90174389	TSPAN6	protein_coding	-1	gain
CNVR166	87901203	92882230	X	ENSSSCG00000031033	ENSSSCT00000032831	92719586	92751194	FAM133A	protein_coding	-1	gain
CNVR166	87901203	92882230	X	ENSSSCG00000012482	ENSSSCT00000033221	90178155	90205276	SRPX2	protein_coding	1	gain
CNVR166	87901203	92882230	X	ENSSSCG00000012483	ENSSSCT00000013650	90210464	90310136		protein_coding	-1	gain
CNVR166	87901203	92882230	X	ENSSSCG00000012484	ENSSSCT00000013651	90213527	90245931		protein_coding	1	gain
CNVR166	87901203	92882230	X	ENSSSCG00000012486	ENSSSCT00000034276	90379855	90409930	CSTF2	protein_coding	1	gain
CNVR166	87901203	92882230	X	ENSSSCG00000012504	ENSSSCT00000013672	92751743	92754360	NAP1L3	protein_coding	1	gain
CNVR166	87901203	92882230	X	ENSSSCG00000012485	ENSSSCT00000013652	90411584	90496843	NOX1	protein_coding	-1	gain
CNVR166	87901203	92882230	X	ENSSSCG00000025009	ENSSSCT00000026715	92505231	92505337	U6	snRNA	1	gain
CNVR166	87901203	92882230	X	ENSSSCG00000028625	ENSSSCT00000030427	90196205	90196311	U6	snRNA	1	gain
CNVR166	87901203	92882230	X	ENSSSCG00000020516	ENSSSCT00000022111	88060637	88060707		miRNA	1	gain
CNVR167	108647614	109121920	X	ENSSSCG00000012595	ENSSSCT00000028402	109048854	109122133	LRCH2	protein_coding	-1	gain
CNVR167	108647614	109121920	X	ENSSSCG00000012593	ENSSSCT00000013772	108566657	108871722	HTR2C	protein_coding	1	gain
CNVR167	108647614	109121920	X	ENSSSCG00000012594	ENSSSCT00000013773	108965153	109001627	IL13RA2	protein_coding	-1	gain
CNVR167	108647614	109121920	X	ENSSSCG00000018716	ENSSSCT00000020311	109065243	109065372	SNORA35	snoRNA	-1	gain
CNVR167	108647614	109121920	X	ENSSSCG00000018127	ENSSSCT00000019722	108710169	108710248		miRNA	1	gain
CNVR167	108647614	109121920	X	ENSSSCG00000023815	ENSSSCT00000025448	108648718	108648824	U6	snRNA	1	gain
CNVR167	108647614	109121920	X	ENSSSCG00000019551	ENSSSCT00000021146	108806659	108806769		miRNA	1	gain
CNVR167	108647614	109121920	X	ENSSSCG00000018193	ENSSSCT00000019788	108691599	108691709		miRNA	1	gain
CNVR168	110165834	110208364	X	ENSSSCG00000027730	ENSSSCT00000029504	110181771	110181877	U6	snRNA	1	loss
CNVR169	117574951	118990898	X	ENSSSCG00000030723	ENSSSCT00000034702	117647425	117647578	CH242-229D21.1	pseudogene	1	gain
CNVR169	117574951	118990898	X	ENSSSCG00000030841	ENSSSCT00000034036	118951380	118951838	CH242-520N23.1	pseudogene	-1	gain
CNVR169	117574951	118990898	X	ENSSSCG00000012645	ENSSSCT00000013826	118321510	118323181	DCAF12L2	protein_coding	-1	gain
CNVR169	117574951	118990898	X	ENSSSCG00000012647	ENSSSCT00000013828	118823787	118825784	PRR32	protein_coding	1	gain
CNVR169	117574951	118990898	X	ENSSSCG00000020431	ENSSSCT00000022026	117608200	117608279	ssc-mir-2483	miRNA	-1	gain
CNVR169	117574951	118990898	X	ENSSSCG00000027661	ENSSSCT00000029424	118352120	118352206		miRNA	-1	gain
CNVR169	117574951	118990898	X	ENSSSCG00000020408	ENSSSCT00000022003	117837872	117837956		miRNA	-1	gain
CNVR170	119762138	121399063	X	ENSSSCG00000001541	ENSSSCT00000001717	119935171	119937924	CH242-3L20.1	pseudogene	1	gain
CNVR170	119762138	121399063	X	ENSSSCG00000030779	ENSSSCT00000035700	120308031	120308964	CH242-196N11.2	pseudogene	-1	gain
CNVR170	119762138	121399063	X	ENSSSCG00000012648	ENSSSCT00000013829	120283685	120285088	ACTRT1	protein_coding	-1	gain
CNVR172	141433236	142000976	X	ENSSSCG00000012759	ENSSSCT00000013949	141414894	141458759		protein_coding	1	gain
CNVR172	141433236	142000976	X	ENSSSCG00000012761	ENSSSCT00000013951	141485376	141495524		protein_coding	1	gain
CNVR172	141433236	142000976	X	ENSSSCG00000012762	ENSSSCT00000013952	141515518	141516801		protein_coding	1	gain
CNVR172	141433236	142000976	X	ENSSSCG00000026657	ENSSSCT00000027243	141526031	141536696		protein_coding	-1	gain
CNVR172	141433236	142000976	X	ENSSSCG00000030075	ENSSSCT00000022521	141587591	141589396		protein_coding	1	gain
CNVR172	141433236	142000976	X	ENSSSCG00000021789	ENSSSCT00000023721	141624353	141625836	ZNF275	protein_coding	-1	gain
CNVR172	141433236	142000976	X	ENSSSCG00000012768	ENSSSCT00000013958	141779330	141787155	ZFP92	protein_coding	1	gain
CNVR172	141433236	142000976	X	ENSSSCG00000022182	ENSSSCT00000029755	141798113	141799723	TREX2	protein_coding	-1	gain
CNVR172	141433236	142000976	X	ENSSSCG00000012767	ENSSSCT00000013957	141801422	141821573	HAUS7	protein_coding	-1	gain
CNVR172	141433236	142000976	X	ENSSSCG00000012766	ENSSSCT00000013956	141845599	141858874	BGN	protein_coding	1	gain
CNVR172	141433236	142000976	X	ENSSSCG00000012769	ENSSSCT00000013959	141883400	141921127	ATP2B3	protein_coding	1	gain
CNVR172	141433236	142000976	X	ENSSSCG00000012774	ENSSSCT00000013966	141968377	141977757	DUSP9	processed_transcript	1	gain
CNVR172	141433236	142000976	X	ENSSSCG00000012770	ENSSSCT00000034383	141924441	141933321	FAM58A	protein_coding	-1	gain
CNVR172	141433236	142000976	X	ENSSSCG00000012773	ENSSSCT00000013965	141989366	141993498	PNCK	protein_coding	-1	gain

## Sheet: Table C
Table C. Gene ontology (GO) analysis of genes in identified CNVRs
Category	Term	Count	PValue	Benjamini	Genes	Fold Enrichment
GOTERM_BP_FAT	GO:0007608~sensory perception of smell	52	9.55e-34	1.39e-30	ENSG00000181927, ENSG00000181371, ENSG00000205029, ENSG00000181767, ENSG00000197233, ENSG00000112462, ENSG00000136839, ENSG00000175398, ENSG00000206536, ENSG00000174957, ENSG00000188324, ENSG00000186119, ENSG00000172199, ENSG00000186117, ENSG00000155249, ENSG00000184478, ENSG00000184166, ENSG00000176281, ENSG00000181761, ENSG00000172457, ENSG00000167822, ENSG00000172487, ENSG00000198877, ENSG0000…	8.70798
GOTERM_BP_FAT	GO:0007606~sensory perception of chemical stimulus	52	7.23e-32	5.28e-29	ENSG00000181927, ENSG00000181371, ENSG00000205029, ENSG00000181767, ENSG00000197233, ENSG00000112462, ENSG00000136839, ENSG00000175398, ENSG00000206536, ENSG00000174957, ENSG00000188324, ENSG00000186119, ENSG00000172199, ENSG00000186117, ENSG00000155249, ENSG00000184478, ENSG00000184166, ENSG00000176281, ENSG00000181761, ENSG00000172457, ENSG00000167822, ENSG00000172487, ENSG00000198877, ENSG0000…	7.99601
GOTERM_BP_FAT	GO:0050890~cognition	60	1.44e-22	7.03e-20	ENSG00000188419, ENSG00000181927, ENSG00000181371, ENSG00000181767, ENSG00000205029, ENSG00000197233, ENSG00000112462, ENSG00000136839, ENSG00000196338, ENSG00000175398, ENSG00000206536, ENSG00000174957, ENSG00000188324, ENSG00000186119, ENSG00000172199, ENSG00000186117, ENSG00000155249, ENSG00000184478, ENSG00000184166, ENSG00000176281, ENSG00000181761, ENSG00000172457, ENSG00000167822, ENSG0000…	4.34012
GOTERM_BP_FAT	GO:0007600~sensory perception	56	1.85e-22	6.76e-20	ENSG00000188419, ENSG00000181927, ENSG00000181371, ENSG00000205029, ENSG00000181767, ENSG00000197233, ENSG00000112462, ENSG00000136839, ENSG00000175398, ENSG00000206536, ENSG00000174957, ENSG00000188324, ENSG00000186119, ENSG00000172199, ENSG00000186117, ENSG00000155249, ENSG00000184478, ENSG00000184166, ENSG00000176281, ENSG00000181761, ENSG00000172457, ENSG00000167822, ENSG00000172487, ENSG0000…	4.66495
GOTERM_BP_FAT	GO:0007186~G-protein coupled receptor protein signaling pathway	64	4.81e-21	1.41e-18	ENSG00000168243, ENSG00000181927, ENSG00000181371, ENSG00000181767, ENSG00000205029, ENSG00000197233, ENSG00000112462, ENSG00000136839, ENSG00000175398, ENSG00000102384, ENSG00000206536, ENSG00000147145, ENSG00000174957, ENSG00000188324, ENSG00000186119, ENSG00000172199, ENSG00000186117, ENSG00000155249, ENSG00000184478, ENSG00000173198, ENSG00000184166, ENSG00000176281, ENSG00000078589, ENSG0000…	3.78876
GOTERM_BP_FAT	GO:0050877~neurological system process	66	2.06e-19	5.02e-17	ENSG00000188419, ENSG00000181927, ENSG00000181371, ENSG00000181767, ENSG00000205029, ENSG00000197233, ENSG00000112462, ENSG00000136839, ENSG00000196338, ENSG00000175398, ENSG00000206536, ENSG00000174957, ENSG00000188324, ENSG00000186119, ENSG00000172199, ENSG00000186117, ENSG00000155249, ENSG00000184478, ENSG00000184166, ENSG00000176281, ENSG00000181761, ENSG00000172457, ENSG00000147246, ENSG0000…	3.42239
GOTERM_BP_FAT	GO:0007166~cell surface receptor linked signal transduction	73	1.76e-13	3.67e-11	ENSG00000168243, ENSG00000196468, ENSG00000181927, ENSG00000184481, ENSG00000181371, ENSG00000181767, ENSG00000205029, ENSG00000197233, ENSG00000112462, ENSG00000136839, ENSG00000175398, ENSG00000102384, ENSG00000206536, ENSG00000147145, ENSG00000188324, ENSG00000174957, ENSG00000186119, ENSG00000172199, ENSG00000186117, ENSG00000155249, ENSG00000184478, ENSG00000156886, ENSG00000173198, ENSG0000…	2.43659
GOTERM_BP_FAT	GO:0048488~synaptic vesicle endocytosis	3	0.0238141	0.987743	ENSG00000159082, ENSG00000102003, ENSG00000102383	12.2247
GOTERM_BP_FAT	GO:0021700~developmental maturation	6	0.0350081	0.996926	ENSG00000087245, ENSG00000142192, ENSG00000102003, ENSG00000102383, ENSG00000010671, ENSG00000180509	3.29654
GOTERM_BP_FAT	GO:0008406~gonad development	6	0.0478185	0.999222	ENSG00000180530, ENSG00000142168, ENSG00000169083, ENSG00000102384, ENSG00000169297, ENSG00000154734	3.02466
GOTERM_BP_FAT	GO:0009152~purine ribonucleotide biosynthetic process	6	0.0478185	0.999222	ENSG00000154723, ENSG00000165240, ENSG00000187527, ENSG00000127249, ENSG00000159131, ENSG00000067842	3.02466
GOTERM_BP_FAT	GO:0016338~calcium-independent cell-cell adhesion	3	0.0509824	0.999041	ENSG00000156284, ENSG00000156282, ENSG00000159261	8.14978
GOTERM_BP_FAT	GO:0031346~positive regulation of cell projection organization	4	0.0534948	0.998761	ENSG00000169855, ENSG00000157404, ENSG00000185008, ENSG00000156299	4.65702
GOTERM_BP_FAT	GO:0009260~ribonucleotide biosynthetic process	6	0.0610314	0.999156	ENSG00000154723, ENSG00000165240, ENSG00000187527, ENSG00000127249, ENSG00000159131, ENSG00000067842	2.82108
GOTERM_BP_FAT	GO:0060078~regulation of postsynaptic membrane potential	3	0.0616657	0.998696	ENSG00000163485, ENSG00000171189, ENSG00000196338	7.3348
GOTERM_BP_FAT	GO:0006754~ATP biosynthetic process	5	0.0639038	0.998391	ENSG00000154723, ENSG00000165240, ENSG00000187527, ENSG00000127249, ENSG00000067842	3.30396
GOTERM_BP_FAT	GO:0007610~behavior	14	0.0654716	0.997936	ENSG00000169855, ENSG00000171587, ENSG00000169306, ENSG00000142168, ENSG00000173198, ENSG00000185008, ENSG00000102007, ENSG00000116957, ENSG00000142192, ENSG00000165240, ENSG00000171189, ENSG00000196338, ENSG00000157404, ENSG00000147246	1.71145
GOTERM_BP_FAT	GO:0006497~protein amino acid lipidation	4	0.0702596	0.99809	ENSG00000165029, ENSG00000188419, ENSG00000185808, ENSG00000102383	4.16159
GOTERM_BP_FAT	GO:0050772~positive regulation of axonogenesis	3	0.0730303	0.997878	ENSG00000169855, ENSG00000185008, ENSG00000156299	6.668
GOTERM_BP_FAT	GO:0045137~development of primary sexual characteristics	6	0.0738469	0.997258	ENSG00000180530, ENSG00000142168, ENSG00000169083, ENSG00000102384, ENSG00000169297, ENSG00000154734	2.6672
GOTERM_BP_FAT	GO:0048608~reproductive structure development	6	0.0738469	0.997258	ENSG00000180530, ENSG00000142168, ENSG00000169083, ENSG00000102384, ENSG00000169297, ENSG00000154734	2.6672
GOTERM_BP_FAT	GO:0006801~superoxide metabolic process	3	0.0789456	0.997539	ENSG00000007952, ENSG00000165240, ENSG00000142168	6.37809
GOTERM_BP_FAT	GO:0051151~negative regulation of smooth muscle cell differentiation	2	0.0789981	0.996737	ENSG00000159200, ENSG00000184481	24.4493
GOTERM_BP_FAT	GO:0007095~mitotic cell cycle G2/M transition DNA damage checkpoint	2	0.0789981	0.996737	ENSG00000170312, ENSG00000184481	24.4493
GOTERM_BP_FAT	GO:0009206~purine ribonucleoside triphosphate biosynthetic process	5	0.0801293	0.996099	ENSG00000154723, ENSG00000165240, ENSG00000187527, ENSG00000127249, ENSG00000067842	3.05617
GOTERM_BP_FAT	GO:0009145~purine nucleoside triphosphate biosynthetic process	5	0.0830151	0.995934	ENSG00000154723, ENSG00000165240, ENSG00000187527, ENSG00000127249, ENSG00000067842	3.01844
GOTERM_BP_FAT	GO:0009201~ribonucleoside triphosphate biosynthetic process	5	0.0830151	0.995934	ENSG00000154723, ENSG00000165240, ENSG00000187527, ENSG00000127249, ENSG00000067842	3.01844
GOTERM_BP_FAT	GO:0050769~positive regulation of neurogenesis	4	0.0851611	0.995565	ENSG00000169855, ENSG00000157404, ENSG00000185008, ENSG00000156299	3.83519
GOTERM_BP_FAT	GO:0009150~purine ribonucleotide metabolic process	6	0.0855615	0.994631	ENSG00000154723, ENSG00000165240, ENSG00000187527, ENSG00000127249, ENSG00000159131, ENSG00000067842	2.55124
GOTERM_BP_FAT	GO:0032990~cell part morphogenesis	9	0.088737	0.994601	ENSG00000116957, ENSG00000169855, ENSG00000171587, ENSG00000142192, ENSG00000165240, ENSG00000046651, ENSG00000198836, ENSG00000079482, ENSG00000185008	1.95595
GOTERM_BP_FAT	GO:0009142~nucleoside triphosphate biosynthetic process	5	0.0889379	0.993527	ENSG00000154723, ENSG00000165240, ENSG00000187527, ENSG00000127249, ENSG00000067842	2.9457
GOTERM_BP_FAT	GO:0042158~lipoprotein biosynthetic process	4	0.0890809	0.992314	ENSG00000165029, ENSG00000188419, ENSG00000185808, ENSG00000102383	3.76144
GOTERM_BP_FAT	GO:0008542~visual learning	3	0.0911993	0.991915	ENSG00000142192, ENSG00000196338, ENSG00000157404	5.86784
GOTERM_BP_FAT	GO:0050804~regulation of synaptic transmission	6	0.0955952	0.992503	ENSG00000163485, ENSG00000171189, ENSG00000196338, ENSG00000157404, ENSG00000102003, ENSG00000147246	2.46548
GOTERM_BP_FAT	GO:0016188~synaptic vesicle maturation	2	0.0977568	0.992158	ENSG00000102003, ENSG00000102383	19.5595
GOTERM_BP_FAT	GO:0032703~negative regulation of interleukin-2 production	2	0.0977568	0.992158	ENSG00000155659, ENSG00000049768	19.5595
GOTERM_BP_FAT	GO:0007626~locomotory behavior	9	0.0989669	0.991417	ENSG00000116957, ENSG00000169855, ENSG00000171587, ENSG00000142192, ENSG00000165240, ENSG00000142168, ENSG00000173198, ENSG00000185008, ENSG00000102007	1.91343
GOTERM_CC_FAT	GO:0005886~plasma membrane	109	3.05e-08	7.85e-06	ENSG00000177398, ENSG00000102385, ENSG00000181927, ENSG00000205029, ENSG00000112462, ENSG00000175398, ENSG00000159261, ENSG00000147145, ENSG00000169855, ENSG00000188324, ENSG00000174957, ENSG00000172199, ENSG00000165194, ENSG00000155249, ENSG00000156886, ENSG00000173198, ENSG00000185008, ENSG00000102003, ENSG00000184166, ENSG00000102007, ENSG00000155659, ENSG00000102302, ENSG00000125257, ENSG0000…	1.57645
GOTERM_CC_FAT	GO:0016021~integral to membrane	131	1.14e-06	0.000146	ENSG00000177398, ENSG00000198856, ENSG00000155052, ENSG00000181927, ENSG00000205029, ENSG00000000003, ENSG00000112462, ENSG00000187527, ENSG00000127249, ENSG00000196338, ENSG00000175398, ENSG00000102383, ENSG00000000005, ENSG00000159261, ENSG00000131174, ENSG00000166979, ENSG00000152910, ENSG00000147145, ENSG00000169855, ENSG00000174957, ENSG00000188324, ENSG00000172199, ENSG00000165194, ENSG0000…	1.38442
GOTERM_CC_FAT	GO:0031224~intrinsic to membrane	131	9.84e-06	0.000843	ENSG00000177398, ENSG00000198856, ENSG00000155052, ENSG00000181927, ENSG00000205029, ENSG00000000003, ENSG00000112462, ENSG00000187527, ENSG00000127249, ENSG00000196338, ENSG00000175398, ENSG00000102383, ENSG00000000005, ENSG00000159261, ENSG00000131174, ENSG00000166979, ENSG00000152910, ENSG00000147145, ENSG00000169855, ENSG00000174957, ENSG00000188324, ENSG00000172199, ENSG00000165194, ENSG0000…	1.33676
GOTERM_CC_FAT	GO:0030673~axolemma	3	0.00687982	0.358249	ENSG00000169855, ENSG00000163485, ENSG00000185008	22.5259
GOTERM_CC_FAT	GO:0032589~neuron projection membrane	3	0.0124728	0.475408	ENSG00000169855, ENSG00000163485, ENSG00000185008	16.8944
GOTERM_CC_FAT	GO:0005743~mitochondrial inner membrane	12	0.0320534	0.752276	ENSG00000164919, ENSG00000169188, ENSG00000154723, ENSG00000170516, ENSG00000156885, ENSG00000155008, ENSG00000126953, ENSG00000131269, ENSG00000198836, ENSG00000158578, ENSG00000131174, ENSG00000160194	2.05559
GOTERM_CC_FAT	GO:0019866~organelle inner membrane	12	0.049402	0.844342	ENSG00000164919, ENSG00000169188, ENSG00000154723, ENSG00000170516, ENSG00000156885, ENSG00000155008, ENSG00000126953, ENSG00000131269, ENSG00000198836, ENSG00000158578, ENSG00000131174, ENSG00000160194	1.91032
GOTERM_CC_FAT	GO:0043005~neuron projection	12	0.0706936	0.905135	ENSG00000169855, ENSG00000163485, ENSG00000142192, ENSG00000102385, ENSG00000165240, ENSG00000171189, ENSG00000142168, ENSG00000169083, ENSG00000198836, ENSG00000079482, ENSG00000185008, ENSG00000136928	1.79608
GOTERM_CC_FAT	GO:0031256~leading edge membrane	3	0.0775821	0.900347	ENSG00000169855, ENSG00000163485, ENSG00000185008	6.43596
GOTERM_CC_FAT	GO:0044455~mitochondrial membrane part	6	0.0882245	0.906864	ENSG00000154723, ENSG00000170516, ENSG00000156885, ENSG00000198836, ENSG00000131174, ENSG00000160194	2.52626
GOTERM_CC_FAT	GO:0030425~dendrite	7	0.0900358	0.889679	ENSG00000163485, ENSG00000102385, ENSG00000171189, ENSG00000142168, ENSG00000169083, ENSG00000198836, ENSG00000079482	2.25259
GOTERM_MF_FAT	GO:0004984~olfactory receptor activity	52	7.09e-34	2.99e-31	ENSG00000181927, ENSG00000181371, ENSG00000205029, ENSG00000181767, ENSG00000197233, ENSG00000112462, ENSG00000136839, ENSG00000175398, ENSG00000206536, ENSG00000174957, ENSG00000188324, ENSG00000186119, ENSG00000172199, ENSG00000186117, ENSG00000155249, ENSG00000184478, ENSG00000184166, ENSG00000176281, ENSG00000181761, ENSG00000172457, ENSG00000167822, ENSG00000172487, ENSG00000198877, ENSG0000…	8.73317
GOTERM_MF_FAT	GO:0016820~hydrolase activity, acting on acid anhydrides, catalyzing transmembrane movement of substances	8	0.00482398	0.639521	ENSG00000154723, ENSG00000165240, ENSG00000151418, ENSG00000187527, ENSG00000127249, ENSG00000131269, ENSG00000125257, ENSG00000067842	3.82076
GOTERM_MF_FAT	GO:0001608~nucleotide receptor activity, G-protein coupled	4	0.0129913	0.841091	ENSG00000147145, ENSG00000163485, ENSG00000147138, ENSG00000078589	7.97376
GOTERM_MF_FAT	GO:0016676~oxidoreductase activity, acting on heme group of donors, oxygen as acceptor	4	0.0129913	0.841091	ENSG00000164919, ENSG00000170516, ENSG00000156885, ENSG00000131174	7.97376
GOTERM_MF_FAT	GO:0004129~cytochrome-c oxidase activity	4	0.0129913	0.841091	ENSG00000164919, ENSG00000170516, ENSG00000156885, ENSG00000131174	7.97376
GOTERM_MF_FAT	GO:0045028~purinergic nucleotide receptor activity, G-protein coupled	4	0.0129913	0.841091	ENSG00000147145, ENSG00000163485, ENSG00000147138, ENSG00000078589	7.97376
GOTERM_MF_FAT	GO:0015002~heme-copper terminal oxidase activity	4	0.0129913	0.841091	ENSG00000164919, ENSG00000170516, ENSG00000156885, ENSG00000131174	7.97376
GOTERM_MF_FAT	GO:0016675~oxidoreductase activity, acting on heme group of donors	4	0.0129913	0.841091	ENSG00000164919, ENSG00000170516, ENSG00000156885, ENSG00000131174	7.97376
GOTERM_MF_FAT	GO:0042626~ATPase activity, coupled to transmembrane movement of substances	7	0.0163946	0.825175	ENSG00000154723, ENSG00000165240, ENSG00000187527, ENSG00000127249, ENSG00000131269, ENSG00000125257, ENSG00000067842	3.4143
GOTERM_MF_FAT	GO:0043492~ATPase activity, coupled to movement of substances	7	0.0171929	0.768621	ENSG00000154723, ENSG00000165240, ENSG00000187527, ENSG00000127249, ENSG00000131269, ENSG00000125257, ENSG00000067842	3.37836
GOTERM_MF_FAT	GO:0015405~P-P-bond-hydrolysis-driven transmembrane transporter activity	7	0.0256066	0.838695	ENSG00000154723, ENSG00000165240, ENSG00000187527, ENSG00000127249, ENSG00000131269, ENSG00000125257, ENSG00000067842	3.086
GOTERM_MF_FAT	GO:0015399~primary active transmembrane transporter activity	7	0.0256066	0.838695	ENSG00000154723, ENSG00000165240, ENSG00000187527, ENSG00000127249, ENSG00000131269, ENSG00000125257, ENSG00000067842	3.086
GOTERM_MF_FAT	GO:0001614~purinergic nucleotide receptor activity	4	0.026662	0.803904	ENSG00000147145, ENSG00000163485, ENSG00000147138, ENSG00000078589	6.11322
GOTERM_MF_FAT	GO:0016502~nucleotide receptor activity	4	0.026662	0.803904	ENSG00000147145, ENSG00000163485, ENSG00000147138, ENSG00000078589	6.11322
GOTERM_MF_FAT	GO:0031267~small GTPase binding	6	0.0441651	0.907701	ENSG00000007952, ENSG00000165029, ENSG00000188419, ENSG00000147202, ENSG00000102302, ENSG00000102362	3.09095
GOTERM_MF_FAT	GO:0042625~ATPase activity, coupled to transmembrane movement of ions	5	0.0477277	0.899043	ENSG00000154723, ENSG00000165240, ENSG00000187527, ENSG00000127249, ENSG00000067842	3.63882
GOTERM_MF_FAT	GO:0051020~GTPase binding	6	0.057725	0.918661	ENSG00000007952, ENSG00000165029, ENSG00000188419, ENSG00000147202, ENSG00000102302, ENSG00000102362	2.86557
GOTERM_MF_FAT	GO:0004090~carbonyl reductase (NADPH) activity	2	0.0637512	0.920115	ENSG00000159231, ENSG00000159228	30.5661
GOTERM_MF_FAT	GO:0022890~inorganic cation transmembrane transporter activity	7	0.0716926	0.926915	ENSG00000164919, ENSG00000154723, ENSG00000165240, ENSG00000170516, ENSG00000156885, ENSG00000131174, ENSG00000067842	2.3951
GOTERM_MF_FAT	GO:0004843~ubiquitin-specific protease activity	3	0.081641	0.937002	ENSG00000102226, ENSG00000156256, ENSG00000155313	6.25216
GOTERM_MF_FAT	GO:0015662~ATPase activity, coupled to transmembrane movement of ions, phosphorylative mechanism	4	0.0816954	0.923385	ENSG00000165240, ENSG00000187527, ENSG00000127249, ENSG00000067842	3.90205
GOTERM_MF_FAT	GO:0004965~GABA-B receptor activity	2	0.0840891	0.91551	ENSG00000136928, ENSG00000204681	22.9246
GOTERM_MF_FAT	GO:0015078~hydrogen ion transmembrane transporter activity	5	0.0862142	0.907259	ENSG00000164919, ENSG00000154723, ENSG00000170516, ENSG00000156885, ENSG00000131174	2.97722
GOTERM_MF_FAT	GO:0019783~small conjugating protein-specific protease activity	3	0.088179	0.898885	ENSG00000102226, ENSG00000156256, ENSG00000155313	5.98032

## Sheet: Table D
Table D. Pathway analysis of genes in identified CNVRs
Category	Term	Count	PValue	Benjamini	Genes	Fold Enrichment
KEGG_PATHWAY	hsa04740:Olfactory transduction	49	3.14711e-28	1.88827e-26	ENSG00000167822, ENSG00000172487, ENSG00000167825, ENSG00000198877, ENSG00000181927, ENSG00000172154, ENSG00000181371, ENSG00000181767, ENSG00000205029, ENSG00000197233, ENSG00000172208, ENSG00000112462, ENSG00000204701, ENSG00000204700, ENSG00000204688, ENSG00000168787, ENSG00000204703, ENSG00000181752, ENSG00000174970, ENSG00000136839, ENSG00000149133, ENSG00000175398, ENSG00000182652, ENSG0000…	6.49129
KEGG_PATHWAY	hsa00190:Oxidative phosphorylation	7	0.0743617	0.901545	ENSG00000164919, ENSG00000154723, ENSG00000170516, ENSG00000151418, ENSG00000156885, ENSG00000131174, ENSG00000160194	2.34704
KEGG_PATHWAY	hsa02010:ABC transporters	4	0.0857641	0.833595	ENSG00000165029, ENSG00000131269, ENSG00000125257, ENSG00000179869	3.78879

## Sheet: Table E
Table E. Previously reported QTLs overlapping with identified CNVRs
CNVR ID	Chr.	CNVR Start	CNVR End	QTL ID	QTL Start	QTL End	QTL Name	Abbrev	P-value
1	chr1	8288718	8397202	3109	7964370	16114132	Palmitoleic acid percentage	Abbrev=FA-C16:1
1	chr1	8288718	8397202	8531	5506017	13935497	Drip loss	Abbrev=DRIPL	P-value=0.009716
1	chr1	8288718	8397202	3848	7964370	22514169	Water holding capacity	Abbrev=WHC
1	chr1	8288718	8397202	3111	7964370	16114132	Stearic acid percentage	Abbrev=FA-C18:0
1	chr1	28640879	28753934	5671	7964370	252283830	Name="Shoulder subcutaneous fat thickness"	Abbrev=SHOUFATD	;P-value=<0.01
1	chr1	28640879	28753934	5670	7964370	257944209	Name="Average backfat thickness"	Abbrev=BFT	;P-value=<0.01
1	chr1	28640879	28753934	5680	7964370	292955427	Name="Average daily gain (10 weeks-slaughter)"	Abbrev=ADG	P-value=<0.01
1	chr1	28640879	28753934	21209	8025530	292730648	Name="Shoulder subcutaneous fat thickness"	Abbrev=SHOUFATD	P-value=<0.05
1	chr1	28640879	28753934	21208	10067182	292041505	Name="backfat at last rib"	Abbrev=LRIBF	P-value=<0.01
1	chr1	28640879	28753934	8012	11871848	116126341	Name="Drip loss"	Abbrev=DRIPL	P-value=0.003055
1	chr1	28640879	28753934	8043	11871848	116126341	Name="Drip loss"	Abbrev=DRIPL	P-value=0.003442
1	chr1	28640879	28753934	8110	11871848	116126341	Name="Drip loss"	Abbrev=DRIPL	P-value=0.004154
1	chr1	28640879	28753934	8154	11871848	116126341	Name="Drip loss"	Abbrev=DRIP	P-value=0.004644
1	chr1	28640879	28753934	8349	11871848	116126341	Name="Drip loss"	Abbrev=DRIPL	P-value=0.007033
1	chr1	28640879	28753934	8411	11871848	116126341	Name="Drip loss"	Abbrev=DRIPL	P-value=0.008085
1	chr1	28640879	28753934	8562	11871848	116126341	Name="Drip loss"	Abbrev=DRIPL	P-value=0.010152
1	chr1	28640879	28753934	7751	11871848	116126341	Name="Drip loss"	Abbrev=DRIPL	P-value=0.000141
1	chr1	28640879	28753934	7763	11871848	116126341	Name="Drip loss"	Abbrev=DRIPL	P-value=0.000224
1	chr1	28640879	28753934	7776	11871848	116126341	Name="Drip loss"	Abbrev=DRIPL	P-value=0.000435
1	chr1	28640879	28753934	7815	11871848	116126341	Name="Drip loss"	Abbrev=DRIPL	P-value=0.000918
1	chr1	28640879	28753934	7567	15380966	242497921	Name="Melanoma susceptibility"	Abbrev=MELAN	P-value=<0.05
1	chr1	28640879	28753934	3863	15454564	69718238	Name="Leaf fat weight"	Abbrev=LFW	P-value=<0.05
1	chr1	28640879	28753934	5232	16114132	289571736	Name="Body weight (birth)"	Abbrev=BW	P-value=<0.05
1	chr1	28640879	28753934	7015	16114132	62261447	Name="Percentage type IIa fibers"	Abbrev=FIB2AP	P-value=0.0050
1	chr1	28640879	28753934	2787	16114132	36144885	Name="pH for Longissmus Dorsi"	Abbrev=pH
1	chr1	28640879	28753934	16844	16114132	52874641	Name="average daily gain"	Abbrev=ADG	P-value=0.0001
1	chr1	28640879	28753934	868	16114132	52874641	Name="Ham weight"	Abbrev=HAMWT
1	chr1	28640879	28753934	5679	16114132	252283830	Name="Belly meat content"	Abbrev=BYLEAN	P-value=<0.01
1	chr1	28640879	28753934	5674	16114132	252283830	Name="backfat at last rib"	Abbrev=LRIBF	P-value=<0.01
1	chr1	28640879	28753934	5678	16114132	252283830	Name="Estimated carcass lean content"	Abbrev=ECLC	P-value=<0.01
1	chr1	28640879	28753934	5677	16114132	252283830	Name="Fat to meat ratio"	Abbrev=FMR	P-value=<0.01
1	chr1	28640879	28753934	5217	16114132	292187438	Name="Shoulder subcutaneous fat thickness"	Abbrev=SHOUFATD	P-value=<0.01
1	chr1	28640879	28753934	5237	16114132	292845492	Name="backfat above muscle dorsi"	Abbrev=SCF	P-value=<0.05
1	chr1	28640879	28753934	7592	18004420	242497921	Name="Melanoma susceptibility"	Abbrev=MELAN	P-value=<0.05
1	chr1	28640879	28753934	29689	20064508	210644363	Name="Body weight (20 weeks)"	Abbrev=Wt	P-value=<0.05
1	chr1	28640879	28753934	3980	20064508	52874641	Name="CIE-a*"	Abbrev=CIEa	P-value=0.48
1	chr1	28640879	28753934	338	20064508	36144885	Name="Average daily gain (entire life)"	Abbrev=ADG
1	chr1	28640879	28753934	15047	20064508	274130998	Name="White blood cell counts"	Abbrev=WBC
1	chr1	28640879	28753934	43	22514169	52874641	Name="Backfat at tenth rib"	Abbrev=10RIBBFT
1	chr1	28640879	28753934	3838	22514169	52874641	Name="muscle protein percentage"	Abbrev=MPROT	P-value=<0.05
1	chr1	28640879	28753934	28055	24391349	29002222	Name="Residual feed intake"	Abbrev=RFI	P-value=<0.05
1	chr1	28640879	28753934	28056	24391349	29002222	Name="Residual feed intake"	Abbrev=RFI	P-value=<0.05
1	chr1	28640879	28753934	28057	24391349	29002222	Name="Residual feed intake"	Abbrev=RFI	P-value=<0.05
1	chr1	28640879	28753934	28069	24391349	29002222	Name="Residual feed intake"	Abbrev=RFI	P-value=<0.05
1	chr1	28640879	28753934	28058	24391349	29002222	Name="Residual feed intake"	Abbrev=RFI	P-value=<0.05
1	chr1	28640879	28753934	28070	24391349	29002222	Name="Residual feed intake"	Abbrev=RFI	P-value=<0.05
1	chr1	28640879	28753934	28059	24391349	29002222	Name="Residual feed intake"	Abbrev=RFI	P-value=<0.05
1	chr1	28640879	28753934	28071	24391349	29002222	Name="Residual feed intake"	Abbrev=RFI	P-value=<0.05
1	chr1	28640879	28753934	28060	24391349	29002222	Name="Residual feed intake"	Abbrev=RFI	P-value=<0.05
1	chr1	28640879	28753934	28072	24391349	29002222	Name="Residual feed intake"	Abbrev=RFI	P-value=<0.05
1	chr1	28640879	28753934	28061	24391349	29002222	Name="Residual feed intake"	Abbrev=RFI	P-value=<0.05
1	chr1	28640879	28753934	28073	24391349	29002222	Name="Residual feed intake"	Abbrev=RFI	P-value=<0.05
1	chr1	28640879	28753934	28062	24391349	29002222	Name="Residual feed intake"	Abbrev=RFI	P-value=<0.05
1	chr1	28640879	28753934	28063	24391349	29002222	Name="Residual feed intake"	Abbrev=RFI	P-value=<0.05
1	chr1	28640879	28753934	28080	24391349	29002222	Name="Daily feed intake"	Abbrev=FEEDIN	P-value=<0.05
1	chr1	28640879	28753934	16885	24647055	52874641	Name="average daily gain"	Abbrev=ADG	P-value=<0.05
1	chr1	28640879	28753934	16896	24647055	52874641	Name="Carcass weight (hot)"	Abbrev=HCWT	P-value=<0.05
1	chr1	28640879	28753934	42	24647055	52874641	Name="Average backfat thickness"	Abbrev=BFT
1	chr1	28640879	28753934	46	24647055	52874641	Name="Loin muscle area"	Abbrev=LMA
1	chr1	28640879	28753934	5676	24647055	257944209	Name="Fat area"	Abbrev=FATAREA	P-value=<0.01
1	chr1	28640879	28753934	16901	24647055	119841750	Name="Carcass weight (hot)"	Abbrev=HCWT	P-value=<0.05
1	chr1	28640879	28753934	5262	24673417	292845492	Name="Body weight (weaning)"	Abbrev=WWT	P-value=<0.05
1	chr1	28640879	28753934	3866	26587370	50856261	Name="Loin muscle area"	Abbrev=LMA	P-value=<0.05
1	chr1	28640879	28753934	29553	28050709	28899322	Name="Feed conversion ratio"	Abbrev=FEEDCON	P-value=<0.10
1	chr1	28640879	28753934	8308	28711653	28818087	Name="Drip loss"	Abbrev=DRIPL	P-value=0.006016
1	chr1	28640879	28753934	8501	28711653	28818087	Name="Drip loss"	Abbrev=DRIPL	P-value=0.009299
1	chr1	28640879	28753934	8545	28711653	28818087	Name="Drip loss"	Abbrev=DRIPL	P-value=0.009976
1	chr1	28640879	28753934	7873	28711653	28818087	Name="Drip loss"	Abbrev=DRIPL	P-value=0.001889
1	chr1	49439200	49492820	5671	7964370	252283830	Name="Shoulder subcutaneous fat thickness"	Abbrev=SHOUFATD	;P-value=<0.01
1	chr1	49439200	49492820	5670	7964370	257944209	Name="Average backfat thickness"	Abbrev=BFT	;P-value=<0.01
1	chr1	49439200	49492820	5680	7964370	292955427	Name="Average daily gain (10 weeks-slaughter)"	Abbrev=ADG	P-value=<0.01
1	chr1	49439200	49492820	21209	8025530	292730648	Name="Shoulder subcutaneous fat thickness"	Abbrev=SHOUFATD	P-value=<0.05
1	chr1	49439200	49492820	21208	10067182	292041505	Name="backfat at last rib"	Abbrev=LRIBF	P-value=<0.01
1	chr1	49439200	49492820	8012	11871848	116126341	Name="Drip loss"	Abbrev=DRIPL	P-value=0.003055
1	chr1	49439200	49492820	8043	11871848	116126341	Name="Drip loss"	Abbrev=DRIPL	P-value=0.003442
1	chr1	49439200	49492820	8110	11871848	116126341	Name="Drip loss"	Abbrev=DRIPL	P-value=0.004154
1	chr1	49439200	49492820	8154	11871848	116126341	Name="Drip loss"	Abbrev=DRIP	P-value=0.004644
1	chr1	49439200	49492820	8349	11871848	116126341	Name="Drip loss"	Abbrev=DRIPL	P-value=0.007033
1	chr1	49439200	49492820	8411	11871848	116126341	Name="Drip loss"	Abbrev=DRIPL	P-value=0.008085
1	chr1	49439200	49492820	8562	11871848	116126341	Name="Drip loss"	Abbrev=DRIPL	P-value=0.010152
1	chr1	49439200	49492820	7751	11871848	116126341	Name="Drip loss"	Abbrev=DRIPL	P-value=0.000141
1	chr1	49439200	49492820	7763	11871848	116126341	Name="Drip loss"	Abbrev=DRIPL	P-value=0.000224
1	chr1	49439200	49492820	7776	11871848	116126341	Name="Drip loss"	Abbrev=DRIPL	P-value=0.000435
1	chr1	49439200	49492820	7815	11871848	116126341	Name="Drip loss"	Abbrev=DRIPL	P-value=0.000918
1	chr1	49439200	49492820	7567	15380966	242497921	Name="Melanoma susceptibility"	Abbrev=MELAN	P-value=<0.05
1	chr1	49439200	49492820	3863	15454564	69718238	Name="Leaf fat weight"	Abbrev=LFW	P-value=<0.05
1	chr1	49439200	49492820	16844	16114132	52874641	Name="average daily gain"	Abbrev=ADG	P-value=0.0001
1	chr1	49439200	49492820	868	16114132	52874641	Name="Ham weight"	Abbrev=HAMWT
1	chr1	49439200	49492820	5679	16114132	252283830	Name="Belly meat content"	Abbrev=BYLEAN	P-value=<0.01
1	chr1	49439200	49492820	5674	16114132	252283830	Name="backfat at last rib"	Abbrev=LRIBF	P-value=<0.01
1	chr1	49439200	49492820	5678	16114132	252283830	Name="Estimated carcass lean content"	Abbrev=ECLC	P-value=<0.01
1	chr1	49439200	49492820	5677	16114132	252283830	Name="Fat to meat ratio"	Abbrev=FMR	P-value=<0.01
1	chr1	49439200	49492820	5217	16114132	292187438	Name="Shoulder subcutaneous fat thickness"	Abbrev=SHOUFATD	P-value=<0.01
1	chr1	49439200	49492820	5237	16114132	292845492	Name="backfat above muscle dorsi"	Abbrev=SCF	P-value=<0.05
1	chr1	49439200	49492820	7592	18004420	242497921	Name="Melanoma susceptibility"	Abbrev=MELAN	P-value=<0.05
1	chr1	49439200	49492820	29689	20064508	210644363	Name="Body weight (20 weeks)"	Abbrev=Wt	P-value=<0.05
1	chr1	49439200	49492820	3980	20064508	52874641	Name="CIE-a*"	Abbrev=CIEa	P-value=0.48
1	chr1	49439200	49492820	15047	20064508	274130998	Name="White blood cell counts"	Abbrev=WBC
1	chr1	49439200	49492820	43	22514169	52874641	Name="Backfat at tenth rib"	Abbrev=10RIBBFT
1	chr1	49439200	49492820	3838	22514169	52874641	Name="muscle protein percentage"	Abbrev=MPROT	P-value=<0.05
1	chr1	49439200	49492820	16885	24647055	52874641	Name="average daily gain"	Abbrev=ADG	P-value=<0.05
1	chr1	49439200	49492820	16896	24647055	52874641	Name="Carcass weight (hot)"	Abbrev=HCWT	P-value=<0.05
1	chr1	49439200	49492820	42	24647055	52874641	Name="Average backfat thickness"	Abbrev=BFT
1	chr1	49439200	49492820	46	24647055	52874641	Name="Loin muscle area"	Abbrev=LMA
1	chr1	49439200	49492820	5676	24647055	257944209	Name="Fat area"	Abbrev=FATAREA	P-value=<0.01
1	chr1	49439200	49492820	16901	24647055	119841750	Name="Carcass weight (hot)"	Abbrev=HCWT	P-value=<0.05
1	chr1	49439200	49492820	5262	24673417	292845492	Name="Body weight (weaning)"	Abbrev=WWT	P-value=<0.05
1	chr1	49439200	49492820	3866	26587370	50856261	Name="Loin muscle area"	Abbrev=LMA	P-value=<0.05
1	chr1	49439200	49492820	17635	32319237	289379107	Name="Front feet conformation"	Abbrev=FRFEETC
1	chr1	49439200	49492820	22971	33880975	50902871	Name="Body weight (birth)"	Abbrev=BW	P-value=0.009
1	chr1	49439200	49492820	4260	35389848	228164160	Name="CD2-positive leukocyte number"	Abbrev=CD2L	P-value=<0.05
1	chr1	49439200	49492820	4261	35389848	228164160	Name="CD4-positive leukocyte number"	Abbrev=CD4L	P-value=<0.1
1	chr1	49439200	49492820	841	35389848	52874641	Name="average daily gain"	Abbrev=ADG
1	chr1	49439200	49492820	836	35389848	52874641	Name="Carcass weight (cold)"	Abbrev=CWT
1	chr1	49439200	49492820	837	35389848	52874641	Name="Ham weight"	Abbrev=HAMWT
1	chr1	49439200	49492820	843	35389848	52874641	Name="Body weight (slaughter)"	Abbrev=ENDWT
1	chr1	49439200	49492820	831	35389848	52874641	Name="Head weight"	Abbrev=HEADWT
1	chr1	49439200	49492820	846	35389848	52874641	Name="Shoulder meat weight"	Abbrev=SMWT
1	chr1	49439200	49492820	12710	35389848	52874641	Name="Carcass weight (cold)"	Abbrev=CWT	P-value=<0.01
1	chr1	49439200	49492820	807	35389848	52874641	Name="Loin and neck meat weight"	Abbrev=LNWT
1	chr1	49439200	49492820	12718	35389848	52874641	Name="External fat on ham"	Abbrev=EFATHAM	P-value=<0.01
1	chr1	49439200	49492820	825	35389848	52874641	Name="Shoulder external fat weight"	Abbrev=EFATSHO
1	chr1	49439200	49492820	792	35389848	52874641	Name="Carcass weight (cold)"	Abbrev=CWT
1	chr1	49439200	49492820	833	35389848	52874641	Name="Loin weight"	Abbrev=LOINWT
1	chr1	49439200	49492820	16831	35389848	120316411	Name="backfat at last rib"	Abbrev=LRIBF	P-value=0.0195
1	chr1	49439200	49492820	3222	35389848	169149638	Name="Dressing percentage"	Abbrev=DRESS%
1	chr1	49439200	49492820	79	35389848	230570794	Name="Muscle fat content"	Abbrev=MFCON
1	chr1	49439200	49492820	32103	35935609	141252903	Name="Linoleic acid content"	Abbrev=FA-C18:2	P-value=<0.05
1	chr1	49439200	49492820	5672	36144885	154329026	Name="Backfat at tenth rib"	Abbrev=10RIBBFT	P-value=<0.05
1	chr1	49439200	49492820	5675	36144885	154329026	Name="Side fat thickness"	Abbrev=BFS	P-value=<0.05
1	chr1	49439200	49492820	5960	36144885	105086765	Name="Estimated carcass lean content"	Abbrev=ECLC	P-value=<0.05
1	chr1	49439200	49492820	9658	36144885	204653903	Name="PRRSV antibody titer"	Abbrev=PRRSVAB	P-value=<0.01
1	chr1	49439200	49492820	31809	42824511	293329173	Name="Skin thickness"	Abbrev=SKINT	P-value=<0.05
1	chr1	49439200	49492820	4013	43375367	65079451	Name="Loin muscle area"	Abbrev=LMA	P-value=<0.01
1	chr1	49439200	49492820	4014	43375367	60090096	Name="Backfat at tenth rib"	Abbrev=10RIBBFT	P-value=<0.01
1	chr1	49439200	49492820	21206	44131186	289788010	Name="Backfat at rump"	Abbrev=BFTR	P-value=<0.01
1	chr1	49439200	49492820	21207	45762028	290786847	Name="Leaf fat weight"	Abbrev=LFW	P-value=<0.01
1	chr1	49439200	49492820	5223	45939845	292033322	Name="Teat number"	Abbrev=TNUM	P-value=<0.01
1	chr1	49439200	49492820	12708	47474632	52874641	Name="Carcass weight (cold)"	Abbrev=CWT	P-value=<0.05
1	chr1	49439200	49492820	4019	48054350	117332062	Name="Marbling"	Abbrev=MARB	P-value=<0.05
1	chr1	54752505	54824153	5671	7964370	252283830	Name="Shoulder subcutaneous fat thickness"	Abbrev=SHOUFATD	;P-value=<0.01
1	chr1	54752505	54824153	5670	7964370	257944209	Name="Average backfat thickness"	Abbrev=BFT	;P-value=<0.01
1	chr1	54752505	54824153	5680	7964370	292955427	Name="Average daily gain (10 weeks-slaughter)"	Abbrev=ADG	P-value=<0.01
1	chr1	54752505	54824153	21209	8025530	292730648	Name="Shoulder subcutaneous fat thickness"	Abbrev=SHOUFATD	P-value=<0.05
1	chr1	54752505	54824153	21208	10067182	292041505	Name="backfat at last rib"	Abbrev=LRIBF	P-value=<0.01
1	chr1	54752505	54824153	8012	11871848	116126341	Name="Drip loss"	Abbrev=DRIPL	P-value=0.003055
1	chr1	54752505	54824153	8043	11871848	116126341	Name="Drip loss"	Abbrev=DRIPL	P-value=0.003442
1	chr1	54752505	54824153	8110	11871848	116126341	Name="Drip loss"	Abbrev=DRIPL	P-value=0.004154
1	chr1	54752505	54824153	8154	11871848	116126341	Name="Drip loss"	Abbrev=DRIP	P-value=0.004644
1	chr1	54752505	54824153	8349	11871848	116126341	Name="Drip loss"	Abbrev=DRIPL	P-value=0.007033
1	chr1	54752505	54824153	8411	11871848	116126341	Name="Drip loss"	Abbrev=DRIPL	P-value=0.008085
1	chr1	54752505	54824153	8562	11871848	116126341	Name="Drip loss"	Abbrev=DRIPL	P-value=0.010152
1	chr1	54752505	54824153	7751	11871848	116126341	Name="Drip loss"	Abbrev=DRIPL	P-value=0.000141
1	chr1	54752505	54824153	7763	11871848	116126341	Name="Drip loss"	Abbrev=DRIPL	P-value=0.000224
1	chr1	54752505	54824153	7776	11871848	116126341	Name="Drip loss"	Abbrev=DRIPL	P-value=0.000435
1	chr1	54752505	54824153	7815	11871848	116126341	Name="Drip loss"	Abbrev=DRIPL	P-value=0.000918
1	chr1	54752505	54824153	7567	15380966	242497921	Name="Melanoma susceptibility"	Abbrev=MELAN	P-value=<0.05
1	chr1	54752505	54824153	3863	15454564	69718238	Name="Leaf fat weight"	Abbrev=LFW	P-value=<0.05
1	chr1	54752505	54824153	5232	16114132	289571736	Name="Body weight (birth)"	Abbrev=BW	P-value=<0.05
1	chr1	54752505	54824153	7015	16114132	62261447	Name="Percentage type IIa fibers"	Abbrev=FIB2AP	P-value=0.0050
1	chr1	54752505	54824153	5679	16114132	252283830	Name="Belly meat content"	Abbrev=BYLEAN	P-value=<0.01
1	chr1	54752505	54824153	5674	16114132	252283830	Name="backfat at last rib"	Abbrev=LRIBF	P-value=<0.01
1	chr1	54752505	54824153	5678	16114132	252283830	Name="Estimated carcass lean content"	Abbrev=ECLC	P-value=<0.01
1	chr1	54752505	54824153	5677	16114132	252283830	Name="Fat to meat ratio"	Abbrev=FMR	P-value=<0.01
1	chr1	54752505	54824153	5217	16114132	292187438	Name="Shoulder subcutaneous fat thickness"	Abbrev=SHOUFATD	P-value=<0.01
1	chr1	54752505	54824153	5237	16114132	292845492	Name="backfat above muscle dorsi"	Abbrev=SCF	P-value=<0.05
1	chr1	54752505	54824153	7592	18004420	242497921	Name="Melanoma susceptibility"	Abbrev=MELAN	P-value=<0.05
1	chr1	54752505	54824153	29689	20064508	210644363	Name="Body weight (20 weeks)"	Abbrev=Wt	P-value=<0.05
1	chr1	54752505	54824153	15047	20064508	274130998	Name="White blood cell counts"	Abbrev=WBC
1	chr1	54752505	54824153	5676	24647055	257944209	Name="Fat area"	Abbrev=FATAREA	P-value=<0.01
1	chr1	54752505	54824153	16901	24647055	119841750	Name="Carcass weight (hot)"	Abbrev=HCWT	P-value=<0.05
1	chr1	54752505	54824153	5262	24673417	292845492	Name="Body weight (weaning)"	Abbrev=WWT	P-value=<0.05
1	chr1	54752505	54824153	3866	26587370	50856261	Name="Loin muscle area"	Abbrev=LMA	P-value=<0.05
1	chr1	54752505	54824153	17635	32319237	289379107	Name="Front feet conformation"	Abbrev=FRFEETC
1	chr1	54752505	54824153	22971	33880975	50902871	Name="Body weight (birth)"	Abbrev=BW	P-value=0.009
1	chr1	54752505	54824153	4260	35389848	228164160	Name="CD2-positive leukocyte number"	Abbrev=CD2L	P-value=<0.05
1	chr1	54752505	54824153	4261	35389848	228164160	Name="CD4-positive leukocyte number"	Abbrev=CD4L	P-value=<0.1
1	chr1	54752505	54824153	16831	35389848	120316411	Name="backfat at last rib"	Abbrev=LRIBF	P-value=0.0195
1	chr1	54752505	54824153	3222	35389848	169149638	Name="Dressing percentage"	Abbrev=DRESS%
1	chr1	54752505	54824153	79	35389848	230570794	Name="Muscle fat content"	Abbrev=MFCON
1	chr1	54752505	54824153	32103	35935609	141252903	Name="Linoleic acid content"	Abbrev=FA-C18:2	P-value=<0.05
1	chr1	54752505	54824153	5672	36144885	154329026	Name="Backfat at tenth rib"	Abbrev=10RIBBFT	P-value=<0.05
1	chr1	54752505	54824153	5675	36144885	154329026	Name="Side fat thickness"	Abbrev=BFS	P-value=<0.05
1	chr1	54752505	54824153	5960	36144885	105086765	Name="Estimated carcass lean content"	Abbrev=ECLC	P-value=<0.05
1	chr1	54752505	54824153	9658	36144885	204653903	Name="PRRSV antibody titer"	Abbrev=PRRSVAB	P-value=<0.01
1	chr1	54752505	54824153	31809	42824511	293329173	Name="Skin thickness"	Abbrev=SKINT	P-value=<0.05
1	chr1	54752505	54824153	4013	43375367	65079451	Name="Loin muscle area"	Abbrev=LMA	P-value=<0.01
1	chr1	54752505	54824153	4014	43375367	60090096	Name="Backfat at tenth rib"	Abbrev=10RIBBFT	P-value=<0.01
1	chr1	54752505	54824153	21206	44131186	289788010	Name="Backfat at rump"	Abbrev=BFTR	P-value=<0.01
1	chr1	54752505	54824153	21207	45762028	290786847	Name="Leaf fat weight"	Abbrev=LFW	P-value=<0.01
1	chr1	54752505	54824153	5223	45939845	292033322	Name="Teat number"	Abbrev=TNUM	P-value=<0.01
1	chr1	54752505	54824153	12708	47474632	52874641	Name="Carcass weight (cold)"	Abbrev=CWT	P-value=<0.05
1	chr1	54752505	54824153	4019	48054350	117332062	Name="Marbling"	Abbrev=MARB	P-value=<0.05
1	chr1	54752505	54824153	32098	52520677	84707623	Name="Palmitic acid content"	Abbrev=FA-C16:0	P-value=<0.05
1	chr1	54752505	54824153	872	52874641	169149638	Name="Liver weight"	Abbrev=LIVWT
1	chr1	54752505	54824153	12715	52874641	233806417	Name="External fat on ham"	Abbrev=EFATHAM	P-value=<0.01
1	chr1	54752505	54824153	16859	52874641	130756529	Name="Carcass weight (hot)"	Abbrev=HCWT	P-value=<0.0001
1	chr1	54752505	54824153	860	52874641	169149638	Name="Head weight"	Abbrev=HEADWT
1	chr1	54752505	54824153	871	52874641	169149638	Name="Feed intake"	Abbrev=FEEDIN
1	chr1	54752505	54824153	16886	52874641	233806417	Name="average daily gain"	Abbrev=ADG	P-value=<0.05
1	chr1	54752505	54824153	12711	52874641	169149638	Name="Carcass weight (cold)"	Abbrev=CWT	P-value=<0.01
1	chr1	54752505	54824153	12725	52874641	169149638	Name="Backfat weight";	Abbrev=BFW	P-value=<0.01
1	chr1	54752505	54824153	12719	52874641	169149638	Name="External fat on ham";	Abbrev=EFATHAM	P-value=<0.01
1	chr1	67370311	67458584	5671	7964370	252283830	Name="Shoulder subcutaneous fat thickness"	Abbrev=SHOUFATD	P-value=<0.01
1	chr1	67370311	67458584	5670	7964370	257944209	Name="Average backfat thickness"	Abbrev=BFT	P-value=<0.01
1	chr1	67370311	67458584	5680	7964370	292955427	Name="Average daily gain (10 weeks-slaughter)"	Abbrev=ADG	P-value=<0.01
1	chr1	67370311	67458584	21209	8025530	292730648	Name="Shoulder subcutaneous fat thickness"	Abbrev=SHOUFATD	P-value=<0.05
1	chr1	67370311	67458584	21208	10067182	292041505	Name="backfat at last rib"	Abbrev=LRIBF	P-value=<0.01
1	chr1	67370311	67458584	8012	11871848	116126341	Name="Drip loss"	Abbrev=DRIPL	P-value=0.003055
1	chr1	67370311	67458584	8043	11871848	116126341	Name="Drip loss"	Abbrev=DRIPL	P-value=0.003442
1	chr1	67370311	67458584	8110	11871848	116126341	Name="Drip loss"	Abbrev=DRIPL	P-value=0.004154
1	chr1	67370311	67458584	8154	11871848	116126341	Name="Drip loss"	Abbrev=DRIP	P-value=0.004644
1	chr1	67370311	67458584	8349	11871848	116126341	Name="Drip loss"	Abbrev=DRIPL	P-value=0.007033
1	chr1	67370311	67458584	8411	11871848	116126341	Name="Drip loss"	Abbrev=DRIPL	P-value=0.008085
1	chr1	67370311	67458584	8562	11871848	116126341	Name="Drip loss"	Abbrev=DRIPL	P-value=0.010152
1	chr1	67370311	67458584	7751	11871848	116126341	Name="Drip loss"	Abbrev=DRIPL	P-value=0.000141
1	chr1	67370311	67458584	7763	11871848	116126341	Name="Drip loss"	Abbrev=DRIPL	P-value=0.000224
1	chr1	67370311	67458584	7776	11871848	116126341	Name="Drip loss"	Abbrev=DRIPL	P-value=0.000435
1	chr1	67370311	67458584	7815	11871848	116126341	Name="Drip loss"	Abbrev=DRIPL	P-value=0.000918
1	chr1	67370311	67458584	7567	15380966	242497921	Name="Melanoma susceptibility"	Abbrev=MELAN	P-value=<0.05
1	chr1	67370311	67458584	3863	15454564	69718238	Name="Leaf fat weight"	Abbrev=LFW	P-value=<0.05
1	chr1	67370311	67458584	5232	16114132	289571736	Name="Body weight (birth)"	Abbrev=BW	P-value=<0.05
1	chr1	67370311	67458584	5679	16114132	252283830	Name="Belly meat content"	Abbrev=BYLEAN	P-value=<0.01
1	chr1	67370311	67458584	5674	16114132	252283830	Name="backfat at last rib"	Abbrev=LRIBF	P-value=<0.01
1	chr1	67370311	67458584	5678	16114132	252283830	Name="Estimated carcass lean content"	Abbrev=ECLC	P-value=<0.01
1	chr1	67370311	67458584	5677	16114132	252283830	Name="Fat to meat ratio"	Abbrev=FMR	P-value=<0.01
1	chr1	67370311	67458584	5217	16114132	292187438	Name="Shoulder subcutaneous fat thickness"	Abbrev=SHOUFATD	P-value=<0.01
1	chr1	67370311	67458584	5237	16114132	292845492	Name="backfat above muscle dorsi"	Abbrev=SCF	P-value=<0.05
1	chr1	67370311	67458584	7592	18004420	242497921	Name="Melanoma susceptibility"	Abbrev=MELAN	P-value=<0.05
1	chr1	67370311	67458584	29689	20064508	210644363	Name="Body weight (20 weeks)"	Abbrev=Wt	P-value=<0.05
1	chr1	67370311	67458584	15047	20064508	274130998	Name="White blood cell counts"	Abbrev=WBC
1	chr1	67370311	67458584	5676	24647055	257944209	Name="Fat area"	Abbrev=FATAREA	P-value=<0.01
1	chr1	67370311	67458584	16901	24647055	119841750	Name="Carcass weight (hot)"	Abbrev=HCWT	P-value=<0.05
1	chr1	67370311	67458584	5262	24673417	292845492	Name="Body weight (weaning)"	Abbrev=WWT	P-value=<0.05
1	chr1	67370311	67458584	17635	32319237	289379107	Name="Front feet conformation"	Abbrev=FRFEETC
1	chr1	67370311	67458584	4260	35389848	228164160	Name="CD2-positive leukocyte number"	Abbrev=CD2L	P-value=<0.05
1	chr1	67370311	67458584	4261	35389848	228164160	Name="CD4-positive leukocyte number"	Abbrev=CD4L	P-value=<0.1
1	chr1	67370311	67458584	16831	35389848	120316411	Name="backfat at last rib"	Abbrev=LRIBF	P-value=0.0195
1	chr1	67370311	67458584	3222	35389848	169149638	Name="Dressing percentage"	Abbrev=DRESS%
1	chr1	67370311	67458584	79	35389848	230570794	Name="Muscle fat content"	Abbrev=MFCON
1	chr1	67370311	67458584	32103	35935609	141252903	Name="Linoleic acid content"	Abbrev=FA-C18:2	P-value=<0.05
1	chr1	67370311	67458584	5672	36144885	154329026	Name="Backfat at tenth rib"	Abbrev=10RIBBFT	P-value=<0.05
1	chr1	67370311	67458584	5675	36144885	154329026	Name="Side fat thickness"	Abbrev=BFS	P-value=<0.05
1	chr1	67370311	67458584	5960	36144885	105086765	Name="Estimated carcass lean content"	Abbrev=ECLC	P-value=<0.05
1	chr1	67370311	67458584	9658	36144885	204653903	Name="PRRSV antibody titer"	Abbrev=PRRSVAB	P-value=<0.01
1	chr1	67370311	67458584	31809	42824511	293329173	Name="Skin thickness"	Abbrev=SKINT	P-value=<0.05
1	chr1	67370311	67458584	21206	44131186	289788010	Name="Backfat at rump"	Abbrev=BFTR	P-value=<0.01
1	chr1	67370311	67458584	21207	45762028	290786847	Name="Leaf fat weight"	Abbrev=LFW	P-value=<0.01
1	chr1	67370311	67458584	5223	45939845	292033322	Name="Teat number"	Abbrev=TNUM	P-value=<0.01
1	chr1	67370311	67458584	4019	48054350	117332062	Name="Marbling"	Abbrev=MARB	P-value=<0.05
1	chr1	67370311	67458584	32098	52520677	84707623	Name="Palmitic acid content"	Abbrev=FA-C16:0	P-value=<0.05
1	chr1	67370311	67458584	872	52874641	169149638	Name="Liver weight"	Abbrev=LIVWT
1	chr1	67370311	67458584	12715	52874641	233806417	Name="External fat on ham"	Abbrev=EFATHAM	P-value=<0.01
1	chr1	67370311	67458584	16859	52874641	130756529	Name="Carcass weight (hot)"	Abbrev=HCWT	P-value=<0.0001
1	chr1	67370311	67458584	860	52874641	169149638	Name="Head weight"	Abbrev=HEADWT
1	chr1	67370311	67458584	871	52874641	169149638	Name="Feed intake"	Abbrev=FEEDIN
1	chr1	67370311	67458584	16886	52874641	233806417	Name="average daily gain"	Abbrev=ADG	P-value=<0.05
1	chr1	67370311	67458584	12711	52874641	169149638	Name="Carcass weight (cold)"	Abbrev=CWT	P-value=<0.01
1	chr1	67370311	67458584	12725	52874641	169149638	Name="Backfat weight";	Abbrev=BFW	P-value=<0.01
1	chr1	67370311	67458584	12719	52874641	169149638	Name="External fat on ham"	Abbrev=EFATHAM	P-value=<0.01
1	chr1	67370311	67458584	3673	62261447	133275468	Name="average daily gain"	Abbrev=ADG	P-value=.05
1	chr1	67370311	67458584	3693	62261447	133275468	Name="pH for Longissmus Dorsi"	Abbrev=pH	P-value=.05
1	chr1	67370311	67458584	3694	62261447	133275468	Name="pH for Longissmus Dorsi"	Abbrev=pH	P-value=.05
1	chr1	67370311	67458584	3695	62261447	133275468	Name="Carcass weight (hot)"	Abbrev=HCWT	P-value=.05
1	chr1	67370311	67458584	4108	62261447	133275468	Name="backfat at P2 position"	Abbrev=BFT	P-value=<0.05
1	chr1	67370311	67458584	4107	62261447	133275468	Name="backfat at P2 position"	Abbrev=BFT	P-value=<0.01
1	chr1	67370311	67458584	4109	62261447	133275468	Name="Lean meat percentage"	Abbrev=LEANP	P-value=<0.05
1	chr1	67370311	67458584	4110	62261447	133275468	Name="pH for Longissmus Dorsi"	Abbrev=pH	P-value=<0.05
1	chr1	67370311	67458584	8908	62261447	233806417	Name="Front feet conformation"	Abbrev=FRFEETC	P-value=<0.05
1	chr1	67370311	67458584	329	62261447	162073157	Name="Average daily gain (25-90 kg)"	Abbrev=ADG
1	chr1	67370311	67458584	8910	62261447	233806417	Name="Hind leg conformation"	Abbrev=HLEGC	P-value=<0.05
1	chr1	67370311	67458584	611	62261447	233806417	QName="White blood cell counts"	Abbrev=WBC	P-value=< 0.05
1	chr1	67370311	67458584	5420	63012552	226764071	Name="hematocrit"	Abbrev=HCT	P-value=<0.05
1	chr1	67370311	67458584	5468	63012552	226764071	Name="Lymphocyte number"	Abbrev=LYMPH	P-value=<0.05
1	chr1	67370311	67458584	6366	63012552	226764071	Name="Creatinine level"	Abbrev=CREAT	P-value=<0.05
1	chr1	67370311	67458584	6380	63012552	226764071	Name="Potassium level"	Abbrev=BPOTASS	P-value=<0.05
1	chr1	67370311	67458584	31524	63012552	73935610	Name="pH 24 hr post mortem (ham)"	Abbrev=pH	P-value=0.0040
1	chr1	67370311	67458584	7737	65621022	67777614	Name="Drip loss"	Abbrev=DRIPL	P-value=0.000002
1	chr1	67370311	67458584	7922	65621022	67777614	Name="Drip loss"	Abbrev=DRIPL	P-value=0.002071
1	chr1	67370311	67458584	7929	65621022	67777614	Name="Drip loss"	Abbrev=DRIPL	P-value=0.002158
1	chr1	67370311	67458584	7956	65621022	67777614	Name="Drip loss"	Abbrev=DRIPL	P-value=0.002431
1	chr1	67370311	67458584	7987	65621022	67777614	Name="Drip loss"	Abbrev=DRIPL	P-value=0.002879
1	chr1	67370311	67458584	8096	65621022	67777614	Name="Drip loss"	Abbrev=DRIPL	P-value=0.003685
1	chr1	67370311	67458584	8201	65621022	67777614	Name="Drip loss"	Abbrev=DRIPL	P-value=0.013345
1	chr1	67370311	67458584	8243	65621022	67777614	Name="Drip loss"	Abbrev=DRIPL	P-value=0.009547
1	chr1	67370311	67458584	8335	65621022	67777614	Name="Drip loss"	Abbrev=DRIPL	P-value=0.006911
1	chr1	67370311	67458584	8346	65621022	67777614	Name="Drip loss"	Abbrev=DRIPL	P-value=0.007033
1	chr1	67370311	67458584	8496	65621022	67777614	Name="Drip loss"	Abbrev=DRIPL	P-value=0.009299
1	chr1	67370311	67458584	8505	65621022	67777614	Name="Drip loss"	Abbrev=DRIPL	P-value=0.009381
1	chr1	67370311	67458584	13265	66826105	78529784	Name="Liver weight"	Abbrev=LIVWT	P-value=<0.05
1	chr1	75540483	75602201	5671	7964370	252283830	Name="Shoulder subcutaneous fat thickness"	Abbrev=SHOUFATD	;P-value=<0.01
1	chr1	75540483	75602201	5670	7964370	257944209	Name="Average backfat thickness"	Abbrev=BFT	;P-value=<0.01
1	chr1	75540483	75602201	5680	7964370	292955427	Name="Average daily gain (10 weeks-slaughter)"	Abbrev=ADG	P-value=<0.01
1	chr1	75540483	75602201	21209	8025530	292730648	Name="Shoulder subcutaneous fat thickness"	Abbrev=SHOUFATD	P-value=<0.05
1	chr1	75540483	75602201	21208	10067182	292041505	Name="backfat at last rib"	Abbrev=LRIBF	P-value=<0.01
1	chr1	75540483	75602201	8012	11871848	116126341	Name="Drip loss"	Abbrev=DRIPL	P-value=0.003055
1	chr1	75540483	75602201	8043	11871848	116126341	Name="Drip loss"	Abbrev=DRIPL	P-value=0.003442
1	chr1	75540483	75602201	8110	11871848	116126341	Name="Drip loss"	Abbrev=DRIPL	P-value=0.004154
1	chr1	75540483	75602201	8154	11871848	116126341	Name="Drip loss"	Abbrev=DRIP	P-value=0.004644
1	chr1	75540483	75602201	8349	11871848	116126341	Name="Drip loss"	Abbrev=DRIPL	P-value=0.007033
1	chr1	75540483	75602201	8411	11871848	116126341	Name="Drip loss"	Abbrev=DRIPL	P-value=0.008085
1	chr1	75540483	75602201	8562	11871848	116126341	Name="Drip loss"	Abbrev=DRIPL	P-value=0.010152
1	chr1	75540483	75602201	7751	11871848	116126341	Name="Drip loss"	Abbrev=DRIPL	P-value=0.000141
1	chr1	75540483	75602201	7763	11871848	116126341	Name="Drip loss"	Abbrev=DRIPL	P-value=0.000224
1	chr1	75540483	75602201	7776	11871848	116126341	Name="Drip loss"	Abbrev=DRIPL	P-value=0.000435
1	chr1	75540483	75602201	7815	11871848	116126341	Name="Drip loss"	Abbrev=DRIPL	P-value=0.000918
1	chr1	75540483	75602201	7567	15380966	242497921	Name="Melanoma susceptibility"	Abbrev=MELAN	P-value=<0.05
1	chr1	75540483	75602201	5232	16114132	289571736	Name="Body weight (birth)"	Abbrev=BW	P-value=<0.05
1	chr1	75540483	75602201	5679	16114132	252283830	Name="Belly meat content"	Abbrev=BYLEAN	P-value=<0.01
1	chr1	75540483	75602201	5674	16114132	252283830	Name="backfat at last rib"	Abbrev=LRIBF	P-value=<0.01
1	chr1	75540483	75602201	5678	16114132	252283830	Name="Estimated carcass lean content"	Abbrev=ECLC	P-value=<0.01
1	chr1	75540483	75602201	5677	16114132	252283830	Name="Fat to meat ratio"	Abbrev=FMR	P-value=<0.01
1	chr1	75540483	75602201	5217	16114132	292187438	Name="Shoulder subcutaneous fat thickness"	Abbrev=SHOUFATD	P-value=<0.01
1	chr1	75540483	75602201	5237	16114132	292845492	Name="backfat above muscle dorsi"	Abbrev=SCF	P-value=<0.05
1	chr1	75540483	75602201	7592	18004420	242497921	Name="Melanoma susceptibility"	Abbrev=MELAN	P-value=<0.05
1	chr1	75540483	75602201	29689	20064508	210644363	Name="Body weight (20 weeks)"	Abbrev=Wt	P-value=<0.05
1	chr1	75540483	75602201	15047	20064508	274130998	Name="White blood cell counts"	Abbrev=WBC
1	chr1	75540483	75602201	5676	24647055	257944209	Name="Fat area"	Abbrev=FATAREA	P-value=<0.01
1	chr1	75540483	75602201	16901	24647055	119841750	Name="Carcass weight (hot)"	Abbrev=HCWT	P-value=<0.05
1	chr1	75540483	75602201	5262	24673417	292845492	Name="Body weight (weaning)"	Abbrev=WWT	P-value=<0.05
1	chr1	75540483	75602201	17635	32319237	289379107	Name="Front feet conformation"	Abbrev=FRFEETC
1	chr1	75540483	75602201	4260	35389848	228164160	Name="CD2-positive leukocyte number"	Abbrev=CD2L	P-value=<0.05
1	chr1	75540483	75602201	4261	35389848	228164160	Name="CD4-positive leukocyte number"	Abbrev=CD4L	P-value=<0.1
1	chr1	75540483	75602201	16831	35389848	120316411	Name="backfat at last rib"	Abbrev=LRIBF	P-value=0.0195
1	chr1	75540483	75602201	3222	35389848	169149638	Name="Dressing percentage"	Abbrev=DRESS%
1	chr1	75540483	75602201	79	35389848	230570794	Name="Muscle fat content"	Abbrev=MFCON
1	chr1	75540483	75602201	32103	35935609	141252903	Name="Linoleic acid content"	Abbrev=FA-C18:2	P-value=<0.05
1	chr1	75540483	75602201	5672	36144885	154329026	Name="Backfat at tenth rib"	Abbrev=10RIBBFT	P-value=<0.05
1	chr1	75540483	75602201	5675	36144885	154329026	Name="Side fat thickness"	Abbrev=BFS	P-value=<0.05
1	chr1	75540483	75602201	5960	36144885	105086765	Name="Estimated carcass lean content"	Abbrev=ECLC	P-value=<0.05
1	chr1	75540483	75602201	9658	36144885	204653903	Name="PRRSV antibody titer"	Abbrev=PRRSVAB	P-value=<0.01
1	chr1	75540483	75602201	31809	42824511	293329173	Name="Skin thickness"	Abbrev=SKINT	P-value=<0.05
1	chr1	75540483	75602201	21206	44131186	289788010	Name="Backfat at rump"	Abbrev=BFTR	P-value=<0.01
1	chr1	75540483	75602201	21207	45762028	290786847	Name="Leaf fat weight"	Abbrev=LFW	P-value=<0.01
1	chr1	75540483	75602201	5223	45939845	292033322	Name="Teat number"	Abbrev=TNUM	P-value=<0.01
1	chr1	75540483	75602201	4019	48054350	117332062	Name="Marbling"	Abbrev=MARB	P-value=<0.05
1	chr1	75540483	75602201	32098	52520677	84707623	Name="Palmitic acid content"	Abbrev=FA-C16:0	P-value=<0.05
1	chr1	75540483	75602201	872	52874641	169149638	Name="Liver weight"	Abbrev=LIVWT
1	chr1	75540483	75602201	12715	52874641	233806417	Name="External fat on ham"	Abbrev=EFATHAM	P-value=<0.01
1	chr1	75540483	75602201	16859	52874641	130756529	Name="Carcass weight (hot)"	Abbrev=HCWT	P-value=<0.0001
1	chr1	75540483	75602201	860	52874641	169149638	Name="Head weight"	Abbrev=HEADWT
1	chr1	75540483	75602201	871	52874641	169149638	Name="Feed intake"	Abbrev=FEEDIN
1	chr1	75540483	75602201	16886	52874641	233806417	Name="average daily gain"	Abbrev=ADG	P-value=<0.05
1	chr1	75540483	75602201	12711	52874641	169149638	Name="Carcass weight (cold)"	Abbrev=CWT	P-value=<0.01
1	chr1	75540483	75602201	12725	52874641	169149638	Name="Backfat weight";	Abbrev=BFW	P-value=<0.01
1	chr1	75540483	75602201	12719	52874641	169149638	Name="External fat on ham"	Abbrev=EFATHAM	P-value=<0.01
1	chr1	75540483	75602201	3673	62261447	133275468	Name="average daily gain"	Abbrev=ADG	P-value=.05
1	chr1	75540483	75602201	3693	62261447	133275468	Name="pH for Longissmus Dorsi"	Abbrev=pH	P-value=.05
1	chr1	75540483	75602201	3694	62261447	133275468	Name="pH for Longissmus Dorsi"	Abbrev=pH	P-value=.05
1	chr1	75540483	75602201	3695	62261447	133275468	Name="Carcass weight (hot)"	Abbrev=HCWT	P-value=.05
1	chr1	75540483	75602201	4108	62261447	133275468	Name="backfat at P2 position"	Abbrev=BFT	P-value=<0.05
1	chr1	75540483	75602201	4107	62261447	133275468	Name="backfat at P2 position"	Abbrev=BFT	P-value=<0.01
1	chr1	75540483	75602201	4109	62261447	133275468	Name="Lean meat percentage"	Abbrev=LEANP	P-value=<0.05
1	chr1	75540483	75602201	4110	62261447	133275468	Name="pH for Longissmus Dorsi"	Abbrev=pH	P-value=<0.05
1	chr1	75540483	75602201	8908	62261447	233806417	Name="Front feet conformation"	Abbrev=FRFEETC	P-value=<0.05
1	chr1	75540483	75602201	329	62261447	162073157	Name="Average daily gain (25-90 kg)"	Abbrev=ADG
1	chr1	75540483	75602201	8910	62261447	233806417	Name="Hind leg conformation"	Abbrev=HLEGC	P-value=<0.05
1	chr1	75540483	75602201	611	62261447	233806417	QName="White blood cell counts"	Abbrev=WBC	P-value=< 0.05
1	chr1	75540483	75602201	5420	63012552	226764071	Name="hematocrit"	Abbrev=HCT	P-value=<0.05
1	chr1	75540483	75602201	5468	63012552	226764071	Name="Lymphocyte number"	Abbrev=LYMPH	P-value=<0.05
1	chr1	75540483	75602201	6366	63012552	226764071	Name="Creatinine level"	Abbrev=CREAT	P-value=<0.05
1	chr1	75540483	75602201	6380	63012552	226764071	Name="Potassium level"	Abbrev=BPOTASS	P-value=<0.05
1	chr1	75540483	75602201	13265	66826105	78529784	Name="Liver weight"	Abbrev=LIVWT	P-value=<0.05
1	chr1	75540483	75602201	5206	70361295	292707685	Name="backfat at mid-back"	;Abbrev=BFM	P-value=<0.01
1	chr1	99692675	100080552	5671	7964370	252283830	Name="Shoulder subcutaneous fat thickness"	Abbrev=SHOUFATD	;P-value=<0.01
1	chr1	99692675	100080552	5670	7964370	257944209	Name="Average backfat thickness"	Abbrev=BFT	;P-value=<0.01
1	chr1	99692675	100080552	5680	7964370	292955427	Name="Average daily gain (10 weeks-slaughter)"	Abbrev=ADG	P-value=<0.01
1	chr1	99692675	100080552	21209	8025530	292730648	Name="Shoulder subcutaneous fat thickness"	Abbrev=SHOUFATD	P-value=<0.05
1	chr1	99692675	100080552	21208	10067182	292041505	Name="backfat at last rib"	Abbrev=LRIBF	P-value=<0.01
1	chr1	99692675	100080552	8012	11871848	116126341	Name="Drip loss"	Abbrev=DRIPL	P-value=0.003055
1	chr1	99692675	100080552	8043	11871848	116126341	Name="Drip loss"	Abbrev=DRIPL	P-value=0.003442
1	chr1	99692675	100080552	8110	11871848	116126341	Name="Drip loss"	Abbrev=DRIPL	P-value=0.004154
1	chr1	99692675	100080552	8154	11871848	116126341	Name="Drip loss"	Abbrev=DRIP	P-value=0.004644
1	chr1	99692675	100080552	8349	11871848	116126341	Name="Drip loss"	Abbrev=DRIPL	P-value=0.007033
1	chr1	99692675	100080552	8411	11871848	116126341	Name="Drip loss"	Abbrev=DRIPL	P-value=0.008085
1	chr1	99692675	100080552	8562	11871848	116126341	Name="Drip loss"	Abbrev=DRIPL	P-value=0.010152
1	chr1	99692675	100080552	7751	11871848	116126341	Name="Drip loss"	Abbrev=DRIPL	P-value=0.000141
1	chr1	99692675	100080552	7763	11871848	116126341	Name="Drip loss"	Abbrev=DRIPL	P-value=0.000224
1	chr1	99692675	100080552	7776	11871848	116126341	Name="Drip loss"	Abbrev=DRIPL	P-value=0.000435
1	chr1	99692675	100080552	7815	11871848	116126341	Name="Drip loss"	Abbrev=DRIPL	P-value=0.000918
1	chr1	99692675	100080552	7567	15380966	242497921	Name="Melanoma susceptibility"	Abbrev=MELAN	P-value=<0.05
1	chr1	99692675	100080552	5232	16114132	289571736	Name="Body weight (birth)"	Abbrev=BW	P-value=<0.05
1	chr1	99692675	100080552	5679	16114132	252283830	Name="Belly meat content"	Abbrev=BYLEAN	P-value=<0.01
1	chr1	99692675	100080552	5674	16114132	252283830	Name="backfat at last rib"	Abbrev=LRIBF	P-value=<0.01
1	chr1	99692675	100080552	5678	16114132	252283830	Name="Estimated carcass lean content"	Abbrev=ECLC	P-value=<0.01
1	chr1	99692675	100080552	5677	16114132	252283830	Name="Fat to meat ratio"	Abbrev=FMR	P-value=<0.01
1	chr1	99692675	100080552	5217	16114132	292187438	Name="Shoulder subcutaneous fat thickness"	Abbrev=SHOUFATD	P-value=<0.01
1	chr1	99692675	100080552	5237	16114132	292845492	Name="backfat above muscle dorsi"	Abbrev=SCF	P-value=<0.05
1	chr1	99692675	100080552	7592	18004420	242497921	Name="Melanoma susceptibility"	Abbrev=MELAN	P-value=<0.05
1	chr1	99692675	100080552	29689	20064508	210644363	Name="Body weight (20 weeks)"	Abbrev=Wt	P-value=<0.05
1	chr1	99692675	100080552	15047	20064508	274130998	Name="White blood cell counts"	Abbrev=WBC
1	chr1	99692675	100080552	5676	24647055	257944209	Name="Fat area"	Abbrev=FATAREA	P-value=<0.01
1	chr1	99692675	100080552	16901	24647055	119841750	Name="Carcass weight (hot)"	Abbrev=HCWT	P-value=<0.05
1	chr1	99692675	100080552	5262	24673417	292845492	Name="Body weight (weaning)"	Abbrev=WWT	P-value=<0.05
1	chr1	99692675	100080552	17635	32319237	289379107	Name="Front feet conformation"	Abbrev=FRFEETC
1	chr1	99692675	100080552	4260	35389848	228164160	Name="CD2-positive leukocyte number"	Abbrev=CD2L	P-value=<0.05
1	chr1	99692675	100080552	4261	35389848	228164160	Name="CD4-positive leukocyte number"	Abbrev=CD4L	P-value=<0.1
1	chr1	99692675	100080552	16831	35389848	120316411	Name="backfat at last rib"	Abbrev=LRIBF	P-value=0.0195
1	chr1	99692675	100080552	3222	35389848	169149638	Name="Dressing percentage"	Abbrev=DRESS%
1	chr1	99692675	100080552	79	35389848	230570794	Name="Muscle fat content"	Abbrev=MFCON
1	chr1	99692675	100080552	32103	35935609	141252903	Name="Linoleic acid content"	Abbrev=FA-C18:2	P-value=<0.05
1	chr1	99692675	100080552	5672	36144885	154329026	Name="Backfat at tenth rib"	Abbrev=10RIBBFT	P-value=<0.05
1	chr1	99692675	100080552	5675	36144885	154329026	Name="Side fat thickness"	Abbrev=BFS	P-value=<0.05
1	chr1	99692675	100080552	5960	36144885	105086765	Name="Estimated carcass lean content"	Abbrev=ECLC	P-value=<0.05
1	chr1	99692675	100080552	9658	36144885	204653903	Name="PRRSV antibody titer"	Abbrev=PRRSVAB	P-value=<0.01
1	chr1	99692675	100080552	31809	42824511	293329173	Name="Skin thickness"	Abbrev=SKINT	P-value=<0.05
1	chr1	99692675	100080552	21206	44131186	289788010	Name="Backfat at rump"	Abbrev=BFTR	P-value=<0.01
1	chr1	99692675	100080552	21207	45762028	290786847	Name="Leaf fat weight"	Abbrev=LFW	P-value=<0.01
1	chr1	99692675	100080552	5223	45939845	292033322	Name="Teat number"	Abbrev=TNUM	P-value=<0.01
1	chr1	99692675	100080552	4019	48054350	117332062	Name="Marbling"	Abbrev=MARB	P-value=<0.05
1	chr1	99692675	100080552	872	52874641	169149638	Name="Liver weight"	Abbrev=LIVWT
1	chr1	99692675	100080552	12715	52874641	233806417	Name="External fat on ham"	Abbrev=EFATHAM	P-value=<0.01
1	chr1	99692675	100080552	16859	52874641	130756529	Name="Carcass weight (hot)"	Abbrev=HCWT	P-value=<0.0001
1	chr1	99692675	100080552	860	52874641	169149638	Name="Head weight"	Abbrev=HEADWT
1	chr1	99692675	100080552	871	52874641	169149638	Name="Feed intake"	Abbrev=FEEDIN
1	chr1	99692675	100080552	16886	52874641	233806417	Name="average daily gain"	Abbrev=ADG	P-value=<0.05
1	chr1	99692675	100080552	12711	52874641	169149638	Name="Carcass weight (cold)"	Abbrev=CWT	P-value=<0.01
1	chr1	99692675	100080552	12725	52874641	169149638	Name="Backfat weight";	Abbrev=BFW	P-value=<0.01
1	chr1	99692675	100080552	12719	52874641	169149638	Name="External fat on ham"	Abbrev=EFATHAM	P-value=<0.01
1	chr1	99692675	100080552	3673	62261447	133275468	Name="average daily gain"	Abbrev=ADG	P-value=.05
1	chr1	99692675	100080552	3693	62261447	133275468	Name="pH for Longissmus Dorsi"	Abbrev=pH	P-value=.05
1	chr1	99692675	100080552	3694	62261447	133275468	Name="pH for Longissmus Dorsi"	Abbrev=pH	P-value=.05
1	chr1	99692675	100080552	3695	62261447	133275468	Name="Carcass weight (hot)"	Abbrev=HCWT	P-value=.05
1	chr1	99692675	100080552	4108	62261447	133275468	Name="backfat at P2 position"	Abbrev=BFT	P-value=<0.05
1	chr1	99692675	100080552	4107	62261447	133275468	Name="backfat at P2 position"	Abbrev=BFT	P-value=<0.01
1	chr1	99692675	100080552	4109	62261447	133275468	Name="Lean meat percentage"	Abbrev=LEANP	P-value=<0.05
1	chr1	99692675	100080552	4110	62261447	133275468	Name="pH for Longissmus Dorsi"	Abbrev=pH	P-value=<0.05
1	chr1	99692675	100080552	8908	62261447	233806417	Name="Front feet conformation"	Abbrev=FRFEETC	P-value=<0.05
1	chr1	99692675	100080552	329	62261447	162073157	Name="Average daily gain (25-90 kg)"	Abbrev=ADG
1	chr1	99692675	100080552	8910	62261447	233806417	Name="Hind leg conformation"	Abbrev=HLEGC	P-value=<0.05
1	chr1	99692675	100080552	611	62261447	233806417	QName="White blood cell counts"	Abbrev=WBC	P-value=< 0.05
1	chr1	99692675	100080552	5420	63012552	226764071	Name="hematocrit"	Abbrev=HCT	P-value=<0.05
1	chr1	99692675	100080552	5468	63012552	226764071	Name="Lymphocyte number"	Abbrev=LYMPH	P-value=<0.05
1	chr1	99692675	100080552	6366	63012552	226764071	Name="Creatinine level"	Abbrev=CREAT	P-value=<0.05
1	chr1	99692675	100080552	6380	63012552	226764071	Name="Potassium level"	Abbrev=BPOTASS	P-value=<0.05
1	chr1	99692675	100080552	5206	70361295	292707685	Name="backfat at mid-back"	Abbrev=BFM	P-value=<0.01
1	chr1	99692675	100080552	8853	85842604	162073157	Name="Ear weight"	Abbrev=EARWT	P-value=<0.01
1	chr1	99692675	100080552	8886	85842604	162073157	Name="Ear area"	Abbrev=EAREA	P-value=<0.01
1	chr1	99692675	100080552	8885	85842604	162073157	QName="Ear area"	Abbrev=EAREA	P-value=<0.01
1	chr1	99692675	100080552	8854	85842604	162073157	Name="Ear weight"	Abbrev=EARWT	P-value=<0.01
1	chr1	99692675	100080552	6481	85842604	162073157	Name="Teat number"	Abbrev=TNUM	P-value=<0.05
1	chr1	99692675	100080552	651	85842604	257944209	Name="Backfat at rump"	Abbrev=BFTR
1	chr1	99692675	100080552	8208	96293184	103886375	Name="Drip loss"	Abbrev=DRIPL	P-value=0.005061
1	chr1	99692675	100080552	8266	96293184	103886375	Name="Drip loss"	Abbrev=DRIPL	P-value=0.006016
1	chr1	99692675	100080552	8272	96293184	103886375	Name="Drip loss"	Abbrev=DRIPL	P-value=0.006121
1	chr1	99692675	100080552	8286	96293184	103886375	Name="Drip loss"	Abbrev=DRIPL	P-value=0.006282
1	chr1	99692675	100080552	8321	96293184	103886375	Name="Drip loss"	Abbrev=DRIPL	P-value=0.006734
1	chr1	99692675	100080552	8325	96293184	103886375	Name="Drip loss"	Abbrev=DRIPL	P-value=0.006852
1	chr1	99692675	100080552	8402	96293184	103886375	Name="Drip loss"	Abbrev=DRIPL	P-value=0.007945
1	chr1	99692675	100080552	8403	96293184	103886375	Name="Drip loss"	Abbrev=DRIPL	P-value=0.007945
1	chr1	99692675	100080552	8450	96293184	103886375	Name="Drip loss"	Abbrev=DRIPL	P-value=0.005194
1	chr1	99692675	100080552	8467	96293184	103886375	Name="Drip loss"	Abbrev=DRIPL	P-value=0.008746
1	chr1	99692675	100080552	8469	96293184	103886375	Name="Drip loss"	Abbrev=DRIPL	P-value=0.008823
1	chr1	99692675	100080552	8495	96293184	103886375	Name="Drip loss"	Abbrev=DRIPL	P-value=0.009299
1	chr1	99692675	100080552	8502	96293184	103886375	Name="Drip loss"	Abbrev=DRIPL	P-value=0.008746
1	chr1	99692675	100080552	7766	96293184	103886375	Name="Drip loss"	Abbrev=DRIPL	P-value=0.008446
1	chr1	99692675	100080552	7845	96293184	103886375	Name="Drip loss"	Abbrev=DRIPL	P-value=0.001410
1	chr1	99692675	100080552	4326	96293184	142302138	Name="CIE-L*"	Abbrev=CIEL	P-value=0.000015
1	chr1	99692675	100080552	2845	96293184	247820666	Name="Belly weight"	Abbrev=BELLYWT
1	chr1	102858476	102917151	5671	7964370	252283830	Name="Shoulder subcutaneous fat thickness"	Abbrev=SHOUFATD	;P-value=<0.01
1	chr1	102858476	102917151	5670	7964370	257944209	Name="Average backfat thickness"	Abbrev=BFT	;P-value=<0.01
1	chr1	102858476	102917151	5680	7964370	292955427	Name="Average daily gain (10 weeks-slaughter)"	Abbrev=ADG	P-value=<0.01
1	chr1	102858476	102917151	21209	8025530	292730648	Name="Shoulder subcutaneous fat thickness"	Abbrev=SHOUFATD	P-value=<0.05
1	chr1	102858476	102917151	21208	10067182	292041505	Name="backfat at last rib"	Abbrev=LRIBF	P-value=<0.01
1	chr1	102858476	102917151	8012	11871848	116126341	Name="Drip loss"	Abbrev=DRIPL	P-value=0.003055
1	chr1	102858476	102917151	8043	11871848	116126341	Name="Drip loss"	Abbrev=DRIPL	P-value=0.003442
1	chr1	102858476	102917151	8110	11871848	116126341	Name="Drip loss"	Abbrev=DRIPL	P-value=0.004154
1	chr1	102858476	102917151	8154	11871848	116126341	Name="Drip loss"	Abbrev=DRIP	P-value=0.004644
1	chr1	102858476	102917151	8349	11871848	116126341	Name="Drip loss"	Abbrev=DRIPL	P-value=0.007033
1	chr1	102858476	102917151	8411	11871848	116126341	Name="Drip loss"	Abbrev=DRIPL	P-value=0.008085
1	chr1	102858476	102917151	8562	11871848	116126341	Name="Drip loss"	Abbrev=DRIPL	P-value=0.010152
1	chr1	102858476	102917151	7751	11871848	116126341	Name="Drip loss"	Abbrev=DRIPL	P-value=0.000141
1	chr1	102858476	102917151	7763	11871848	116126341	Name="Drip loss"	Abbrev=DRIPL	P-value=0.000224
1	chr1	102858476	102917151	7776	11871848	116126341	Name="Drip loss"	Abbrev=DRIPL	P-value=0.000435
1	chr1	102858476	102917151	7815	11871848	116126341	Name="Drip loss"	Abbrev=DRIPL	P-value=0.000918
1	chr1	102858476	102917151	7567	15380966	242497921	Name="Melanoma susceptibility"	Abbrev=MELAN	P-value=<0.05
1	chr1	102858476	102917151	5232	16114132	289571736	Name="Body weight (birth)"	Abbrev=BW	P-value=<0.05
1	chr1	102858476	102917151	5679	16114132	252283830	Name="Belly meat content"	Abbrev=BYLEAN	P-value=<0.01
1	chr1	102858476	102917151	5674	16114132	252283830	Name="backfat at last rib"	Abbrev=LRIBF	P-value=<0.01
1	chr1	102858476	102917151	5678	16114132	252283830	Name="Estimated carcass lean content"	Abbrev=ECLC	P-value=<0.01
1	chr1	102858476	102917151	5677	16114132	252283830	Name="Fat to meat ratio"	Abbrev=FMR	P-value=<0.01
1	chr1	102858476	102917151	5217	16114132	292187438	Name="Shoulder subcutaneous fat thickness"	Abbrev=SHOUFATD	P-value=<0.01
1	chr1	102858476	102917151	5237	16114132	292845492	Name="backfat above muscle dorsi"	Abbrev=SCF	P-value=<0.05
1	chr1	102858476	102917151	7592	18004420	242497921	Name="Melanoma susceptibility"	Abbrev=MELAN	P-value=<0.05
1	chr1	102858476	102917151	29689	20064508	210644363	Name="Body weight (20 weeks)"	Abbrev=Wt	P-value=<0.05
1	chr1	102858476	102917151	15047	20064508	274130998	Name="White blood cell counts"	Abbrev=WBC
1	chr1	102858476	102917151	5676	24647055	257944209	Name="Fat area"	Abbrev=FATAREA	P-value=<0.01
1	chr1	102858476	102917151	16901	24647055	119841750	Name="Carcass weight (hot)"	Abbrev=HCWT	P-value=<0.05
1	chr1	102858476	102917151	5262	24673417	292845492	Name="Body weight (weaning)"	Abbrev=WWT	P-value=<0.05
1	chr1	102858476	102917151	17635	32319237	289379107	Name="Front feet conformation"	Abbrev=FRFEETC
1	chr1	102858476	102917151	4260	35389848	228164160	Name="CD2-positive leukocyte number"	Abbrev=CD2L	P-value=<0.05
1	chr1	102858476	102917151	4261	35389848	228164160	Name="CD4-positive leukocyte number"	Abbrev=CD4L	P-value=<0.1
1	chr1	102858476	102917151	16831	35389848	120316411	Name="backfat at last rib"	Abbrev=LRIBF	P-value=0.0195
1	chr1	102858476	102917151	3222	35389848	169149638	Name="Dressing percentage"	Abbrev=DRESS%
1	chr1	102858476	102917151	79	35389848	230570794	Name="Muscle fat content"	Abbrev=MFCON
1	chr1	102858476	102917151	32103	35935609	141252903	Name="Linoleic acid content"	Abbrev=FA-C18:2	P-value=<0.05
1	chr1	102858476	102917151	5672	36144885	154329026	Name="Backfat at tenth rib"	Abbrev=10RIBBFT	P-value=<0.05
1	chr1	102858476	102917151	5675	36144885	154329026	Name="Side fat thickness"	Abbrev=BFS	P-value=<0.05
1	chr1	102858476	102917151	5960	36144885	105086765	Name="Estimated carcass lean content"	Abbrev=ECLC	P-value=<0.05
1	chr1	102858476	102917151	9658	36144885	204653903	Name="PRRSV antibody titer"	Abbrev=PRRSVAB	P-value=<0.01
1	chr1	102858476	102917151	31809	42824511	293329173	Name="Skin thickness"	Abbrev=SKINT	P-value=<0.05
1	chr1	102858476	102917151	21206	44131186	289788010	Name="Backfat at rump"	Abbrev=BFTR	P-value=<0.01
1	chr1	102858476	102917151	21207	45762028	290786847	Name="Leaf fat weight"	Abbrev=LFW	P-value=<0.01
1	chr1	102858476	102917151	5223	45939845	292033322	Name="Teat number"	Abbrev=TNUM	P-value=<0.01
1	chr1	102858476	102917151	4019	48054350	117332062	Name="Marbling"	Abbrev=MARB	P-value=<0.05
1	chr1	102858476	102917151	872	52874641	169149638	Name="Liver weight"	Abbrev=LIVWT
1	chr1	102858476	102917151	12715	52874641	233806417	Name="External fat on ham"	Abbrev=EFATHAM	P-value=<0.01
1	chr1	102858476	102917151	16859	52874641	130756529	Name="Carcass weight (hot)"	Abbrev=HCWT	P-value=<0.0001
1	chr1	102858476	102917151	860	52874641	169149638	Name="Head weight"	Abbrev=HEADWT
1	chr1	102858476	102917151	871	52874641	169149638	Name="Feed intake"	Abbrev=FEEDIN
1	chr1	102858476	102917151	16886	52874641	233806417	Name="average daily gain"	Abbrev=ADG	P-value=<0.05
1	chr1	102858476	102917151	12711	52874641	169149638	Name="Carcass weight (cold)"	Abbrev=CWT	P-value=<0.01
1	chr1	102858476	102917151	12725	52874641	169149638	Name="Backfat weight";	Abbrev=BFW	P-value=<0.01
1	chr1	102858476	102917151	12719	52874641	169149638	Name="External fat on ham"	Abbrev=EFATHAM	P-value=<0.01
1	chr1	102858476	102917151	3673	62261447	133275468	Name="average daily gain"	Abbrev=ADG	P-value=.05
1	chr1	102858476	102917151	3693	62261447	133275468	Name="pH for Longissmus Dorsi"	Abbrev=pH	P-value=.05
1	chr1	102858476	102917151	3694	62261447	133275468	Name="pH for Longissmus Dorsi"	Abbrev=pH	P-value=.05
1	chr1	102858476	102917151	3695	62261447	133275468	Name="Carcass weight (hot)"	Abbrev=HCWT	P-value=.05
1	chr1	102858476	102917151	4108	62261447	133275468	Name="backfat at P2 position"	Abbrev=BFT	P-value=<0.05
1	chr1	102858476	102917151	4107	62261447	133275468	Name="backfat at P2 position"	Abbrev=BFT	P-value=<0.01
1	chr1	102858476	102917151	4109	62261447	133275468	Name="Lean meat percentage"	Abbrev=LEANP	P-value=<0.05
1	chr1	102858476	102917151	4110	62261447	133275468	Name="pH for Longissmus Dorsi"	Abbrev=pH	P-value=<0.05
1	chr1	102858476	102917151	8908	62261447	233806417	Name="Front feet conformation"	Abbrev=FRFEETC	P-value=<0.05
1	chr1	102858476	102917151	329	62261447	162073157	Name="Average daily gain (25-90 kg)"	Abbrev=ADG
1	chr1	102858476	102917151	8910	62261447	233806417	Name="Hind leg conformation"	Abbrev=HLEGC	P-value=<0.05
1	chr1	102858476	102917151	611	62261447	233806417	QName="White blood cell counts"	Abbrev=WBC	P-value=< 0.05
1	chr1	102858476	102917151	5420	63012552	226764071	Name="hematocrit"	Abbrev=HCT	P-value=<0.05
1	chr1	102858476	102917151	5468	63012552	226764071	Name="Lymphocyte number"	Abbrev=LYMPH	P-value=<0.05
1	chr1	102858476	102917151	6366	63012552	226764071	Name="Creatinine level"	Abbrev=CREAT	P-value=<0.05
1	chr1	102858476	102917151	6380	63012552	226764071	Name="Potassium level"	Abbrev=BPOTASS	P-value=<0.05
1	chr1	102858476	102917151	5206	70361295	292707685	Name="backfat at mid-back"	Abbrev=BFM	P-value=<0.01
1	chr1	102858476	102917151	8853	85842604	162073157	Name="Ear weight"	Abbrev=EARWT	P-value=<0.01
1	chr1	102858476	102917151	8886	85842604	162073157	Name="Ear area"	Abbrev=EAREA	P-value=<0.01
1	chr1	102858476	102917151	8885	85842604	162073157	QName="Ear area"	Abbrev=EAREA	P-value=<0.01
1	chr1	102858476	102917151	8854	85842604	162073157	Name="Ear weight"	Abbrev=EARWT	P-value=<0.01
1	chr1	102858476	102917151	6481	85842604	162073157	Name="Teat number"	Abbrev=TNUM	P-value=<0.05
1	chr1	102858476	102917151	651	85842604	257944209	Name="Backfat at rump"	Abbrev=BFTR
1	chr1	102858476	102917151	8208	96293184	103886375	Name="Drip loss"	Abbrev=DRIPL	P-value=0.005061
1	chr1	102858476	102917151	8266	96293184	103886375	Name="Drip loss"	Abbrev=DRIPL	P-value=0.006016
1	chr1	102858476	102917151	8272	96293184	103886375	Name="Drip loss"	Abbrev=DRIPL	P-value=0.006121
1	chr1	102858476	102917151	8286	96293184	103886375	Name="Drip loss"	Abbrev=DRIPL	P-value=0.006282
1	chr1	102858476	102917151	8321	96293184	103886375	Name="Drip loss"	Abbrev=DRIPL	P-value=0.006734
1	chr1	102858476	102917151	8325	96293184	103886375	Name="Drip loss"	Abbrev=DRIPL	P-value=0.006852
1	chr1	102858476	102917151	8402	96293184	103886375	Name="Drip loss"	Abbrev=DRIPL	P-value=0.007945
1	chr1	102858476	102917151	8403	96293184	103886375	Name="Drip loss"	Abbrev=DRIPL	P-value=0.007945
1	chr1	102858476	102917151	8450	96293184	103886375	Name="Drip loss"	Abbrev=DRIPL	P-value=0.005194
1	chr1	102858476	102917151	8467	96293184	103886375	Name="Drip loss"	Abbrev=DRIPL	P-value=0.008746
1	chr1	102858476	102917151	8469	96293184	103886375	Name="Drip loss"	Abbrev=DRIPL	P-value=0.008823
1	chr1	102858476	102917151	8495	96293184	103886375	Name="Drip loss"	Abbrev=DRIPL	P-value=0.009299
1	chr1	102858476	102917151	8502	96293184	103886375	Name="Drip loss"	Abbrev=DRIPL	P-value=0.008746
1	chr1	102858476	102917151	7766	96293184	103886375	Name="Drip loss"	Abbrev=DRIPL	P-value=0.008446
1	chr1	102858476	102917151	7845	96293184	103886375	Name="Drip loss"	Abbrev=DRIPL	P-value=0.001410
1	chr1	102858476	102917151	4326	96293184	142302138	Name="CIE-L*"	Abbrev=CIEL	P-value=0.000015
1	chr1	102858476	102917151	2845	96293184	247820666	Name="Belly weight"	Abbrev=BELLYWT
1	chr1	102858476	102917151	32099	102645300	103047851	Name="Palmitic acid content"	Abbrev=FA-C16	P-value=<0.05
1	chr1	192734647	192978414	5671	7964370	252283830	Name="Shoulder subcutaneous fat thickness"	Abbrev=SHOUFATD	;P-value=<0.01
1	chr1	192734647	192978414	5670	7964370	257944209	Name="Average backfat thickness"	Abbrev=BFT	;P-value=<0.01
1	chr1	192734647	192978414	5680	7964370	292955427	Name="Average daily gain (10 weeks-slaughter)"	Abbrev=ADG	P-value=<0.01
1	chr1	192734647	192978414	21209	8025530	292730648	Name="Shoulder subcutaneous fat thickness"	Abbrev=SHOUFATD	P-value=<0.05
1	chr1	192734647	192978414	21208	10067182	292041505	Name="backfat at last rib"	Abbrev=LRIBF	P-value=<0.01
1	chr1	192734647	192978414	7567	15380966	242497921	Name="Melanoma susceptibility"	Abbrev=MELAN	P-value=<0.05
1	chr1	192734647	192978414	5232	16114132	289571736	Name="Body weight (birth)"	Abbrev=BW	P-value=<0.05
1	chr1	192734647	192978414	5679	16114132	252283830	Name="Belly meat content"	Abbrev=BYLEAN	P-value=<0.01
1	chr1	192734647	192978414	5674	16114132	252283830	Name="backfat at last rib"	Abbrev=LRIBF	P-value=<0.01
1	chr1	192734647	192978414	5678	16114132	252283830	Name="Estimated carcass lean content"	Abbrev=ECLC	P-value=<0.01
1	chr1	192734647	192978414	5677	16114132	252283830	Name="Fat to meat ratio"	Abbrev=FMR	P-value=<0.01
1	chr1	192734647	192978414	5217	16114132	292187438	Name="Shoulder subcutaneous fat thickness"	Abbrev=SHOUFATD	P-value=<0.01
1	chr1	192734647	192978414	5237	16114132	292845492	Name="backfat above muscle dorsi"	Abbrev=SCF	P-value=<0.05
1	chr1	192734647	192978414	7592	18004420	242497921	Name="Melanoma susceptibility"	Abbrev=MELAN	P-value=<0.05
1	chr1	192734647	192978414	29689	20064508	210644363	Name="Body weight (20 weeks)"	Abbrev=Wt	P-value=<0.05
1	chr1	192734647	192978414	15047	20064508	274130998	Name="White blood cell counts"	Abbrev=WBC
1	chr1	192734647	192978414	5676	24647055	257944209	Name="Fat area"	Abbrev=FATAREA	P-value=<0.01
1	chr1	192734647	192978414	5262	24673417	292845492	Name="Body weight (weaning)"	Abbrev=WWT	P-value=<0.05
1	chr1	192734647	192978414	17635	32319237	289379107	Name="Front feet conformation"	Abbrev=FRFEETC
1	chr1	192734647	192978414	4260	35389848	228164160	Name="CD2-positive leukocyte number"	Abbrev=CD2L	P-value=<0.05
1	chr1	192734647	192978414	4261	35389848	228164160	Name="CD4-positive leukocyte number"	Abbrev=CD4L	P-value=<0.1
1	chr1	192734647	192978414	79	35389848	230570794	Name="Muscle fat content"	Abbrev=MFCON
1	chr1	192734647	192978414	9658	36144885	204653903	Name="PRRSV antibody titer"	Abbrev=PRRSVAB	P-value=<0.01
1	chr1	192734647	192978414	31809	42824511	293329173	Name="Skin thickness"	Abbrev=SKINT	P-value=<0.05
1	chr1	192734647	192978414	21206	44131186	289788010	Name="Backfat at rump"	Abbrev=BFTR	P-value=<0.01
1	chr1	192734647	192978414	21207	45762028	290786847	Name="Leaf fat weight"	Abbrev=LFW	P-value=<0.01
1	chr1	192734647	192978414	5223	45939845	292033322	Name="Teat number"	Abbrev=TNUM	P-value=<0.01
1	chr1	192734647	192978414	12715	52874641	233806417	Name="External fat on ham"	Abbrev=EFATHAM	P-value=<0.01
1	chr1	192734647	192978414	16886	52874641	233806417	Name="average daily gain"	Abbrev=ADG	P-value=<0.05
1	chr1	192734647	192978414	8908	62261447	233806417	Name="Front feet conformation"	Abbrev=FRFEETC	P-value=<0.05
1	chr1	192734647	192978414	8910	62261447	233806417	Name="Hind leg conformation"	Abbrev=HLEGC	P-value=<0.05
1	chr1	192734647	192978414	611	62261447	233806417	QName="White blood cell counts"	Abbrev=WBC	P-value=< 0.05
1	chr1	192734647	192978414	5420	63012552	226764071	Name="hematocrit"	Abbrev=HCT	P-value=<0.05
1	chr1	192734647	192978414	5468	63012552	226764071	Name="Lymphocyte number"	Abbrev=LYMPH	P-value=<0.05
1	chr1	192734647	192978414	6366	63012552	226764071	Name="Creatinine level"	Abbrev=CREAT	P-value=<0.05
1	chr1	192734647	192978414	6380	63012552	226764071	Name="Potassium level"	Abbrev=BPOTASS	P-value=<0.05
1	chr1	192734647	192978414	5206	70361295	292707685	Name="backfat at mid-back"	Abbrev=BFM	P-value=<0.01
1	chr1	192734647	192978414	651	85842604	257944209	Name="Backfat at rump"	Abbrev=BFTR
1	chr1	192734647	192978414	2845	96293184	247820666	Name="Belly weight"	Abbrev=BELLYWT
1	chr1	192734647	192978414	5664	105086765	210644363	Name="pH for Longissmus Dorsi"	Abbrev=pH	P-value=<0.01
1	chr1	192734647	192978414	5665	105086765	210644363	Name="pH for Semimembranosus"	Abbrev=pH	P-value=<0.01
1	chr1	192734647	192978414	5666	105086765	210644363	Name="pH for Longissmus Dorsi"	Abbrev=pH	P-value=<0.01
1	chr1	192734647	192978414	5667	105086765	252283830	Name="Meat color OPTO"	Abbrev=COLORO	P-value=<0.01
1	chr1	192734647	192978414	5668	105086765	210644363	Name="Conductivity 24 hours postmortem (loin)"	Abbrev=cond	P-value=<0.05
1	chr1	192734647	192978414	5669	105086765	274130998	Name="Conductivity 24 hours postmortem (ham)"	Abbrev=cond	P-value=<0.05
1	chr1	192734647	192978414	3796	105086765	228164160	Name="Loin muscle area"	Abbrev=LMA	P-value=<0.01
1	chr1	192734647	192978414	3794	105086765	274130998	Name="backfat at last rib"	Abbrev=LRIBF	P-value=<0.01
1	chr1	192734647	192978414	3795	105086765	228164160	Name="Backfat at tenth rib"	Abbrev=10RIBBFT	P-value=<0.01
1	chr1	192734647	192978414	3793	105086765	274130998	Name="Average backfat thickness"	Abbrev=BFT	P-value=<0.01
1	chr1	192734647	192978414	5255	105873529	290457491	Name="Teat number"	Abbrev=TNUM	P-value=<0.01
1	chr1	192734647	192978414	7936	106187796	309614845	Name="Drip loss"	Abbrev=DRIPL	P-value=0.002216
1	chr1	192734647	192978414	8063	106187796	309614845	Name="Drip loss"	Abbrev=DRIPL	P-value=0.000005
1	chr1	192734647	192978414	8131	106187796	309614845	Name="Drip loss"	Abbrev=DRIPL	P-value=0.004373
1	chr1	192734647	192978414	8300	106187796	309614845	Name="Drip loss"	Abbrev=DRIPL	P-value=0.006448
1	chr1	192734647	192978414	8323	106187796	309614845	Name="Drip loss"	Abbrev=DRIPL	P-value=0.006792
1	chr1	192734647	192978414	8382	106187796	309614845	Name="Drip loss"	Abbrev=DRIPL	P-value=0.007672
1	chr1	192734647	192978414	8480	106187796	309614845	Name="Drip loss"	Abbrev=DRIPL	P-value=0.009058
1	chr1	192734647	192978414	8564	106187796	309614845	Name="Drip loss"	Abbrev=DRIPL	P-value=0.007606
1	chr1	192734647	192978414	8602	106187796	309614845	Name="Drip loss"	Abbrev=DRIPL	P-value=0.011184
1	chr1	192734647	192978414	5640	106747450	233806417	Name="Ear size"	Abbrev=EARSZ
1	chr1	192734647	192978414	5646	106747450	233806417	Name="Ear erectness"	Abbrev=EARER	P-value=<0.01
1	chr1	192734647	192978414	5651	106747450	233806417	Name="Ear erectness"	Abbrev=EARER	P-value=<0.01
1	chr1	192734647	192978414	3171	108714563	220801047	Name="Backfat weight"	Abbrev=BFW
1	chr1	192734647	192978414	5230	108714563	293277782	Name="Body weight (weaning)"	Abbrev=WWT	P-value=<0.01
1	chr1	192734647	192978414	12312	133275468	242497921	Name="Platelet distribution width"	Abbrev=PLDWID	P-value=1.48E-05
1	chr1	192734647	192978414	45	133275468	220801047	Name="Backfat at last lumbar"	Abbrev=LUMBF
1	chr1	192734647	192978414	4020	140728674	229018949	Name="Marbling"	Abbrev=MARB	P-value=<0.05
1	chr1	192734647	192978414	5958	154329026	210644363	Name="Side fat thickness"	Abbrev=BFS	P-value=<0.05
1	chr1	192734647	192978414	11557	162073157	233806417	Name="Salmonella count in spleen"	Abbrev=SECTSPL	P-value=0.037
1	chr1	192734647	192978414	138	162073157	233806417	Name="Backfat at tenth rib"	Abbrev=10RIBBFT	P-value=< 0.001
1	chr1	192734647	192978414	139	162073157	233806417	Name="Average daily gain (on test)"	Abbrev=ADG	P-value=< 0.001
1	chr1	192734647	192978414	140	162073157	233806417	Name="Average daily gain (on test)"	Abbrev=ADG	P-value=< 0.001
1	chr1	192734647	192978414	141	162073157	233806417	Name="Daily feed intake"	Abbrev=FEEDIN	P-value=< 0.01
1	chr1	192734647	192978414	8898	162073157	257944209	Name="Ear erectness"	Abbrev=EARER	P-value=<0.01
1	chr1	192734647	192978414	8742	162275821	311704372	Name="Umbilical hernia"	Abbrev=UMBHERN	P-value=0.014
1	chr1	192734647	192978414	8102	162857849	233723456	Name="Drip loss"	Abbrev=DRIPL	P-value=0.004411
1	chr1	192734647	192978414	8156	162857849	233723456	Name="Drip loss"	Abbrev=DRIPL	P-value=0.002898
1	chr1	192734647	192978414	8348	162857849	233723456	Name="Drip loss"	Abbrev=DRIPL	P-value=0.007033
1	chr1	192734647	192978414	7784	162857849	233723456	Name="Drip loss"	Abbrev=DRIPL	P-value=0.000523
1	chr1	192734647	192978414	7861	162857849	233723456	Name="Drip loss"	Abbrev=DRIPL	P-value=0.001708
1	chr1	192734647	192978414	432	163919363	234502051	Name="Head weight"	Abbrev=HEADWT	P-value=<0.001
1	chr1	192734647	192978414	7453	165580236	257944209	Name="Nonfunctional nipples"	Abbrev=NNIP	P-value=<0.01
1	chr1	192734647	192978414	13264	167392293	226764071	Name="Liver weight"	Abbrev=LIVWT	P-value=<0.05
1	chr1	192734647	192978414	1271	168669767	210644363	Name="Ham fat weight"	Abbrev=HFATW
1	chr1	192734647	192978414	12742	169149638	233806417	Name="Fat to meat ratio"	Abbrev=FMR	P-value=<0.01
1	chr1	192734647	192978414	12714	169149638	233806417	Name="Abdominal fat weight"	Abbrev=ABDF	P-value=<0.05
1	chr1	192734647	192978414	12731	169149638	233806417	Name="backfat above muscle dorsi"	Abbrev=SCF	P-value=<0.01
1	chr1	192734647	192978414	12722	169149638	233806417	Name="Shoulder external fat weight"	Abbrev=EFATSHO	P-value=<0.01
1	chr1	192734647	192978414	12736	169149638	233806417	Name="Fat area"	Abbrev=FATAREA	P-value=<0.01
1	chr1	192734647	192978414	18028	169149638	226764071	Name="Adipocyte diameter"	Abbrev=ADIPDI
1	chr1	192734647	192978414	12724	169149638	233806417	Name="Backfat weight"	Abbrev=BFW	P-value=<0.01
1	chr1	192734647	192978414	3640	169149638	228164160	Name="Loin muscle area"	Abbrev=LMA
1	chr1	192734647	192978414	12709	169149638	233806417	Name="Carcass weight (cold)"	Abbrev=CWT	P-value=<0.01
1	chr1	192734647	192978414	12717	169149638	233806417	Name="External fat on ham"	Abbrev=EFATHAM	P-value=<0.01
1	chr1	192734647	192978414	12733	169149638	233806417	Name="Backfat at tenth rib"	Abbrev=10RIBBFT	P-value=<0.01
1	chr1	192734647	192978414	866	169149638	226764071	Name="Feed intake"	Abbrev=FEEDIN
1	chr1	192734647	192978414	44	169149638	257763699	Name="backfat at last rib"	Abbrev=LRIBF
1	chr1	192734647	192978414	2742	169149638	228164160	Name="Loin eye area (13 weeks of age)"	Abbrev=LEA13W
1	chr1	192734647	192978414	3914	169149638	292955427	QName="average daily gain"	Abbrev=ADG	P-value=<0.001
1	chr1	192734647	192978414	17996	169149638	265323610	Name="Average backfat thickness"	Abbrev=BFT
1	chr1	192734647	192978414	16897	169149638	265323610	Name="Carcass weight (hot)"	Abbrev=HCWT	P-value=<0.05
1	chr1	192734647	192978414	3917	169149638	292955427	Name="average daily gain"	Abbrev=ADG	P-value=0.017
1	chr1	192734647	192978414	1269	174394489	230570794	Name="Average backfat thickness"	Abbrev=BFT
1	chr1	192734647	192978414	4016	175004689	199579088	Name="Average backfat thickness"	Abbrev=BFT	P-value=<0.05
1	chr1	192734647	192978414	12663	176184627	230570794	Name="CIE-a*"	Abbrev=CIEa	P-value=<0.05
1	chr1	192734647	192978414	4021	181255237	212599407	;Name="Percentage type I fibers"	Abbrev=FIB1P	P-value=<0.05
1	chr1	192734647	192978414	12732	191760929	192920254	Name="Backfat at tenth rib"	Abbrev=10RIBBFT	P-value=<0.01
1	chr1	193873995	194258004	5671	7964370	252283830	Name="Shoulder subcutaneous fat thickness"	Abbrev=SHOUFATD	;P-value=<0.01
1	chr1	193873995	194258004	5670	7964370	257944209	Name="Average backfat thickness"	Abbrev=BFT	;P-value=<0.01
1	chr1	193873995	194258004	5680	7964370	292955427	Name="Average daily gain (10 weeks-slaughter)"	Abbrev=ADG	P-value=<0.01
1	chr1	193873995	194258004	21209	8025530	292730648	Name="Shoulder subcutaneous fat thickness"	Abbrev=SHOUFATD	P-value=<0.05
1	chr1	193873995	194258004	21208	10067182	292041505	Name="backfat at last rib"	Abbrev=LRIBF	P-value=<0.01
1	chr1	193873995	194258004	7567	15380966	242497921	Name="Melanoma susceptibility"	Abbrev=MELAN	P-value=<0.05
1	chr1	193873995	194258004	5232	16114132	289571736	Name="Body weight (birth)"	Abbrev=BW	P-value=<0.05
1	chr1	193873995	194258004	5679	16114132	252283830	Name="Belly meat content"	Abbrev=BYLEAN	P-value=<0.01
1	chr1	193873995	194258004	5674	16114132	252283830	Name="backfat at last rib"	Abbrev=LRIBF	P-value=<0.01
1	chr1	193873995	194258004	5678	16114132	252283830	Name="Estimated carcass lean content"	Abbrev=ECLC	P-value=<0.01
1	chr1	193873995	194258004	5677	16114132	252283830	Name="Fat to meat ratio"	Abbrev=FMR	P-value=<0.01
1	chr1	193873995	194258004	5217	16114132	292187438	Name="Shoulder subcutaneous fat thickness"	Abbrev=SHOUFATD	P-value=<0.01
1	chr1	193873995	194258004	5237	16114132	292845492	Name="backfat above muscle dorsi"	Abbrev=SCF	P-value=<0.05
1	chr1	193873995	194258004	7592	18004420	242497921	Name="Melanoma susceptibility"	Abbrev=MELAN	P-value=<0.05
1	chr1	193873995	194258004	29689	20064508	210644363	Name="Body weight (20 weeks)"	Abbrev=Wt	P-value=<0.05
1	chr1	193873995	194258004	15047	20064508	274130998	Name="White blood cell counts"	Abbrev=WBC
1	chr1	193873995	194258004	5676	24647055	257944209	Name="Fat area"	Abbrev=FATAREA	P-value=<0.01
1	chr1	193873995	194258004	5262	24673417	292845492	Name="Body weight (weaning)"	Abbrev=WWT	P-value=<0.05
1	chr1	193873995	194258004	17635	32319237	289379107	Name="Front feet conformation"	Abbrev=FRFEETC
1	chr1	193873995	194258004	4260	35389848	228164160	Name="CD2-positive leukocyte number"	Abbrev=CD2L	P-value=<0.05
1	chr1	193873995	194258004	4261	35389848	228164160	Name="CD4-positive leukocyte number"	Abbrev=CD4L	P-value=<0.1
1	chr1	193873995	194258004	79	35389848	230570794	Name="Muscle fat content"	Abbrev=MFCON
1	chr1	193873995	194258004	9658	36144885	204653903	Name="PRRSV antibody titer"	Abbrev=PRRSVAB	P-value=<0.01
1	chr1	193873995	194258004	31809	42824511	293329173	Name="Skin thickness"	Abbrev=SKINT	P-value=<0.05
1	chr1	193873995	194258004	21206	44131186	289788010	Name="Backfat at rump"	Abbrev=BFTR	P-value=<0.01
1	chr1	193873995	194258004	21207	45762028	290786847	Name="Leaf fat weight"	Abbrev=LFW	P-value=<0.01
1	chr1	193873995	194258004	5223	45939845	292033322	Name="Teat number"	Abbrev=TNUM	P-value=<0.01
1	chr1	193873995	194258004	12715	52874641	233806417	Name="External fat on ham"	Abbrev=EFATHAM	P-value=<0.01
1	chr1	193873995	194258004	16886	52874641	233806417	Name="average daily gain"	Abbrev=ADG	P-value=<0.05
1	chr1	193873995	194258004	8908	62261447	233806417	Name="Front feet conformation"	Abbrev=FRFEETC	P-value=<0.05
1	chr1	193873995	194258004	8910	62261447	233806417	Name="Hind leg conformation"	Abbrev=HLEGC	P-value=<0.05
1	chr1	193873995	194258004	611	62261447	233806417	QName="White blood cell counts"	Abbrev=WBC	P-value=< 0.05
1	chr1	193873995	194258004	5420	63012552	226764071	Name="hematocrit"	Abbrev=HCT	P-value=<0.05
1	chr1	193873995	194258004	5468	63012552	226764071	Name="Lymphocyte number"	Abbrev=LYMPH	P-value=<0.05
1	chr1	193873995	194258004	6366	63012552	226764071	Name="Creatinine level"	Abbrev=CREAT	P-value=<0.05
1	chr1	193873995	194258004	6380	63012552	226764071	Name="Potassium level"	Abbrev=BPOTASS	P-value=<0.05
1	chr1	193873995	194258004	5206	70361295	292707685	Name="backfat at mid-back"	Abbrev=BFM	P-value=<0.01
1	chr1	193873995	194258004	651	85842604	257944209	Name="Backfat at rump"	Abbrev=BFTR
1	chr1	193873995	194258004	2845	96293184	247820666	Name="Belly weight"	Abbrev=BELLYWT
1	chr1	193873995	194258004	5664	105086765	210644363	Name="pH for Longissmus Dorsi"	Abbrev=pH	P-value=<0.01
1	chr1	193873995	194258004	5665	105086765	210644363	Name="pH for Semimembranosus"	Abbrev=pH	P-value=<0.01
1	chr1	193873995	194258004	5666	105086765	210644363	Name="pH for Longissmus Dorsi"	Abbrev=pH	P-value=<0.01
1	chr1	193873995	194258004	5667	105086765	252283830	Name="Meat color OPTO"	Abbrev=COLORO	P-value=<0.01
1	chr1	193873995	194258004	5668	105086765	210644363	Name="Conductivity 24 hours postmortem (loin)"	Abbrev=cond	P-value=<0.05
1	chr1	193873995	194258004	5669	105086765	274130998	Name="Conductivity 24 hours postmortem (ham)"	Abbrev=cond	P-value=<0.05
1	chr1	193873995	194258004	3796	105086765	228164160	Name="Loin muscle area"	Abbrev=LMA	P-value=<0.01
1	chr1	193873995	194258004	3794	105086765	274130998	Name="backfat at last rib"	Abbrev=LRIBF	P-value=<0.01
1	chr1	193873995	194258004	3795	105086765	228164160	Name="Backfat at tenth rib"	Abbrev=10RIBBFT	P-value=<0.01
1	chr1	193873995	194258004	3793	105086765	274130998	Name="Average backfat thickness"	Abbrev=BFT	P-value=<0.01
1	chr1	193873995	194258004	5255	105873529	290457491	Name="Teat number"	Abbrev=TNUM	P-value=<0.01
1	chr1	193873995	194258004	7936	106187796	309614845	Name="Drip loss"	Abbrev=DRIPL	P-value=0.002216
1	chr1	193873995	194258004	8063	106187796	309614845	Name="Drip loss"	Abbrev=DRIPL	P-value=0.000005
1	chr1	193873995	194258004	8131	106187796	309614845	Name="Drip loss"	Abbrev=DRIPL	P-value=0.004373
1	chr1	193873995	194258004	8300	106187796	309614845	Name="Drip loss"	Abbrev=DRIPL	P-value=0.006448
1	chr1	193873995	194258004	8323	106187796	309614845	Name="Drip loss"	Abbrev=DRIPL	P-value=0.006792
1	chr1	193873995	194258004	8382	106187796	309614845	Name="Drip loss"	Abbrev=DRIPL	P-value=0.007672
1	chr1	193873995	194258004	8480	106187796	309614845	Name="Drip loss"	Abbrev=DRIPL	P-value=0.009058
1	chr1	193873995	194258004	8564	106187796	309614845	Name="Drip loss"	Abbrev=DRIPL	P-value=0.007606
1	chr1	193873995	194258004	8602	106187796	309614845	Name="Drip loss"	Abbrev=DRIPL	P-value=0.011184
1	chr1	193873995	194258004	5640	106747450	233806417	Name="Ear size"	Abbrev=EARSZ
1	chr1	193873995	194258004	5646	106747450	233806417	Name="Ear erectness"	Abbrev=EARER	P-value=<0.01
1	chr1	193873995	194258004	5651	106747450	233806417	Name="Ear erectness"	Abbrev=EARER	P-value=<0.01
1	chr1	193873995	194258004	3171	108714563	220801047	Name="Backfat weight"	Abbrev=BFW
1	chr1	193873995	194258004	5230	108714563	293277782	Name="Body weight (weaning)"	Abbrev=WWT	P-value=<0.01
1	chr1	193873995	194258004	12312	133275468	242497921	Name="Platelet distribution width"	Abbrev=PLDWID	P-value=1.48E-05
1	chr1	193873995	194258004	45	133275468	220801047	Name="Backfat at last lumbar"	Abbrev=LUMBF
1	chr1	193873995	194258004	4020	140728674	229018949	Name="Marbling"	Abbrev=MARB	P-value=<0.05
1	chr1	193873995	194258004	5958	154329026	210644363	Name="Side fat thickness"	Abbrev=BFS	P-value=<0.05
1	chr1	193873995	194258004	11557	162073157	233806417	Name="Salmonella count in spleen"	Abbrev=SECTSPL	P-value=0.037
1	chr1	193873995	194258004	138	162073157	233806417	Name="Backfat at tenth rib"	Abbrev=10RIBBFT	P-value=< 0.001
1	chr1	193873995	194258004	139	162073157	233806417	Name="Average daily gain (on test)"	Abbrev=ADG	P-value=< 0.001
1	chr1	193873995	194258004	140	162073157	233806417	Name="Average daily gain (on test)"	Abbrev=ADG	P-value=< 0.001
1	chr1	193873995	194258004	141	162073157	233806417	Name="Daily feed intake"	Abbrev=FEEDIN	P-value=< 0.01
1	chr1	193873995	194258004	8898	162073157	257944209	Name="Ear erectness"	Abbrev=EARER	P-value=<0.01
1	chr1	193873995	194258004	8742	162275821	311704372	Name="Umbilical hernia"	Abbrev=UMBHERN	P-value=0.014
1	chr1	193873995	194258004	8102	162857849	233723456	Name="Drip loss"	Abbrev=DRIPL	P-value=0.004411
1	chr1	193873995	194258004	8156	162857849	233723456	Name="Drip loss"	Abbrev=DRIPL	P-value=0.002898
1	chr1	193873995	194258004	8348	162857849	233723456	Name="Drip loss"	Abbrev=DRIPL	P-value=0.007033
1	chr1	193873995	194258004	7784	162857849	233723456	Name="Drip loss"	Abbrev=DRIPL	P-value=0.000523
1	chr1	193873995	194258004	7861	162857849	233723456	Name="Drip loss"	Abbrev=DRIPL	P-value=0.001708
1	chr1	193873995	194258004	432	163919363	234502051	Name="Head weight"	Abbrev=HEADWT	P-value=<0.001
1	chr1	193873995	194258004	7453	165580236	257944209	Name="Nonfunctional nipples"	Abbrev=NNIP	P-value=<0.01
1	chr1	193873995	194258004	13264	167392293	226764071	Name="Liver weight"	Abbrev=LIVWT	P-value=<0.05
1	chr1	193873995	194258004	1271	168669767	210644363	Name="Ham fat weight"	Abbrev=HFATW
1	chr1	193873995	194258004	12742	169149638	233806417	Name="Fat to meat ratio"	Abbrev=FMR	P-value=<0.01
1	chr1	193873995	194258004	12714	169149638	233806417	Name="Abdominal fat weight"	Abbrev=ABDF	P-value=<0.05
1	chr1	193873995	194258004	12731	169149638	233806417	Name="backfat above muscle dorsi"	Abbrev=SCF	P-value=<0.01
1	chr1	193873995	194258004	12722	169149638	233806417	Name="Shoulder external fat weight"	Abbrev=EFATSHO	P-value=<0.01
1	chr1	193873995	194258004	12736	169149638	233806417	Name="Fat area"	Abbrev=FATAREA	P-value=<0.01
1	chr1	193873995	194258004	18028	169149638	226764071	Name="Adipocyte diameter"	Abbrev=ADIPDI
1	chr1	193873995	194258004	12724	169149638	233806417	Name="Backfat weight"	Abbrev=BFW	P-value=<0.01
1	chr1	193873995	194258004	3640	169149638	228164160	Name="Loin muscle area"	Abbrev=LMA
1	chr1	193873995	194258004	12709	169149638	233806417	Name="Carcass weight (cold)"	Abbrev=CWT	P-value=<0.01
1	chr1	193873995	194258004	12717	169149638	233806417	Name="External fat on ham"	Abbrev=EFATHAM	P-value=<0.01
1	chr1	193873995	194258004	12733	169149638	233806417	Name="Backfat at tenth rib"	Abbrev=10RIBBFT	P-value=<0.01
1	chr1	193873995	194258004	866	169149638	226764071	Name="Feed intake"	Abbrev=FEEDIN
1	chr1	193873995	194258004	44	169149638	257763699	Name="backfat at last rib"	Abbrev=LRIBF
1	chr1	193873995	194258004	2742	169149638	228164160	Name="Loin eye area (13 weeks of age)"	Abbrev=LEA13W
1	chr1	193873995	194258004	3914	169149638	292955427	QName="average daily gain"	Abbrev=ADG	P-value=<0.001
1	chr1	193873995	194258004	17996	169149638	265323610	Name="Average backfat thickness"	Abbrev=BFT
1	chr1	193873995	194258004	16897	169149638	265323610	Name="Carcass weight (hot)"	Abbrev=HCWT	P-value=<0.05
1	chr1	193873995	194258004	3917	169149638	292955427	Name="average daily gain"	Abbrev=ADG	P-value=0.017
1	chr1	193873995	194258004	1269	174394489	230570794	Name="Average backfat thickness"	Abbrev=BFT
1	chr1	193873995	194258004	4016	175004689	199579088	Name="Average backfat thickness"	Abbrev=BFT	P-value=<0.05
1	chr1	193873995	194258004	12663	176184627	230570794	Name="CIE-a*"	Abbrev=CIEa	P-value=<0.05
1	chr1	193873995	194258004	4021	181255237	212599407	;Name="Percentage type I fibers"	Abbrev=FIB1P	P-value=<0.05
1	chr1	193873995	194258004	8971	194055592	195653836	Name="Liver weight"	Abbrev=LIVWT	P-value=<0.01
1	chr1	193873995	194258004	22924	194134592	194258004	Name="Total number born alive"	Abbrev=NBA	P-value=<0.001
1	chr1	268547138	268597486	5680	7964370	292955427	Name="Average daily gain (10 weeks-slaughter)"	Abbrev=ADG	P-value=<0.01
1	chr1	268547138	268597486	21209	8025530	292730648	Name="Shoulder subcutaneous fat thickness"	Abbrev=SHOUFATD	P-value=<0.05
1	chr1	268547138	268597486	21208	10067182	292041505	Name="backfat at last rib"	Abbrev=LRIBF	P-value=<0.01
1	chr1	268547138	268597486	5232	16114132	289571736	Name="Body weight (birth)"	Abbrev=BW	P-value=<0.05
1	chr1	268547138	268597486	5217	16114132	292187438	Name="Shoulder subcutaneous fat thickness"	Abbrev=SHOUFATD	P-value=<0.01
1	chr1	268547138	268597486	5237	16114132	292845492	Name="backfat above muscle dorsi"	Abbrev=SCF	P-value=<0.05
1	chr1	268547138	268597486	15047	20064508	274130998	Name="White blood cell counts"	Abbrev=WBC
1	chr1	268547138	268597486	5262	24673417	292845492	Name="Body weight (weaning)"	Abbrev=WWT	P-value=<0.05
1	chr1	268547138	268597486	17635	32319237	289379107	Name="Front feet conformation"	Abbrev=FRFEETC
1	chr1	268547138	268597486	31809	42824511	293329173	Name="Skin thickness"	Abbrev=SKINT	P-value=<0.05
1	chr1	268547138	268597486	21206	44131186	289788010	Name="Backfat at rump"	Abbrev=BFTR	P-value=<0.01
1	chr1	268547138	268597486	21207	45762028	290786847	Name="Leaf fat weight"	Abbrev=LFW	P-value=<0.01
1	chr1	268547138	268597486	5223	45939845	292033322	Name="Teat number"	Abbrev=TNUM	P-value=<0.01
1	chr1	268547138	268597486	5206	70361295	292707685	Name="backfat at mid-back"	Abbrev=BFM	P-value=<0.01
1	chr1	268547138	268597486	5669	105086765	274130998	Name="Conductivity 24 hours postmortem (ham)"	Abbrev=cond	P-value=<0.05
1	chr1	268547138	268597486	3794	105086765	274130998	Name="backfat at last rib"	Abbrev=LRIBF	P-value=<0.01
1	chr1	268547138	268597486	3793	105086765	274130998	Name="Average backfat thickness"	Abbrev=BFT	P-value=<0.01
1	chr1	268547138	268597486	5255	105873529	290457491	Name="Teat number"	Abbrev=TNUM	P-value=<0.01
1	chr1	268547138	268597486	7936	106187796	309614845	Name="Drip loss"	Abbrev=DRIPL	P-value=0.002216
1	chr1	268547138	268597486	8063	106187796	309614845	Name="Drip loss"	Abbrev=DRIPL	P-value=0.000005
1	chr1	268547138	268597486	8131	106187796	309614845	Name="Drip loss"	Abbrev=DRIPL	P-value=0.004373
1	chr1	268547138	268597486	8300	106187796	309614845	Name="Drip loss"	Abbrev=DRIPL	P-value=0.006448
1	chr1	268547138	268597486	8323	106187796	309614845	Name="Drip loss"	Abbrev=DRIPL	P-value=0.006792
1	chr1	268547138	268597486	8382	106187796	309614845	Name="Drip loss"	Abbrev=DRIPL	P-value=0.007672
1	chr1	268547138	268597486	8480	106187796	309614845	Name="Drip loss"	Abbrev=DRIPL	P-value=0.009058
1	chr1	268547138	268597486	8564	106187796	309614845	Name="Drip loss"	Abbrev=DRIPL	P-value=0.007606
1	chr1	268547138	268597486	8602	106187796	309614845	Name="Drip loss"	Abbrev=DRIPL	P-value=0.011184
1	chr1	268547138	268597486	5230	108714563	293277782	Name="Body weight (weaning)"	Abbrev=WWT	P-value=<0.01
1	chr1	268547138	268597486	8742	162275821	311704372	Name="Umbilical hernia"	Abbrev=UMBHERN	P-value=0.014
1	chr1	268547138	268597486	3914	169149638	292955427	QName="average daily gain"	Abbrev=ADG	P-value=<0.001
1	chr1	268547138	268597486	3917	169149638	292955427	Name="average daily gain"	Abbrev=ADG	P-value=0.017
1	chr1	268547138	268597486	798	204653903	279476353	Name="Backfat weight"	Abbrev=BFW
1	chr1	268547138	268597486	5681	210644363	292955427	Name="Average daily gain (entire life)"	Abbrev=ADG	P-value=<0.01
1	chr1	268547138	268597486	18019	216112266	294659146	Name="Adipocyte diameter"	Abbrev=ADIPDI
1	chr1	268547138	268597486	16833	216112266	294659146	Name="backfat at last rib"	Abbrev=LRIBF	P-value=0.0101
1	chr1	268547138	268597486	2842	220801047	271800234	Name="Jowl weight"	Abbrev=JOWLWT
1	chr1	268547138	268597486	2846	220801047	271800234	Name="average daily gain"	Abbrev=ADG
1	chr1	268547138	268597486	274	220801047	286501984	Name="Vertebra number"	Abbrev=VNUM	P-value=< 0.01
1	chr1	268547138	268597486	2849	220801047	271800234	Name="Protein accretion rate"	Abbrev=PAR
1	chr1	268547138	268597486	2847	220801047	271800234	Name="average daily gain"	Abbrev=ADG
1	chr1	268547138	268597486	10617	226764071	274130998	Name="Gestation length"	Abbrev=GEST	P-value=0.00690
1	chr1	268547138	268597486	18634	228164160	306268161	Name="Fat area percentage in carcass"	Abbrev=FAPC
1	chr1	268547138	268597486	278	228164160	274130998	Name="Body weight (birth)"	Abbrev=BW	P-value=< 0.01
1	chr1	268547138	268597486	3772	228164160	274130998	Name="pH 48 hr post-mortem (loin)"	Abbrev=pH	P-value=<0.05
1	chr1	268547138	268597486	3773	228164160	292955427	Name="Meat color score"	Abbrev=mcolor	P-value=<0.05
1	chr1	268547138	268597486	21353	228164160	286501984	Name="Spareribs weight"	Abbrev=SPARERIB	P-value=4.37E-6
1	chr1	268547138	268597486	3223	228164160	286501984	Name="Spareribs weight"	Abbrev=SPARERIB
1	chr1	268547138	268597486	2794	242497921	292955427	Name="Percentage type I fibers"	Abbrev=FIB1P
1	chr1	268547138	268597486	2795	242497921	292955427	Name="Diameter of type IIb muscle fibers"	Abbrev=FIB2BDIAM
1	chr1	268547138	268597486	582	256785161	270836919	Name="Teat number"	Abbrev=TNUM
1	chr1	268547138	268597486	1275	257763699	271800234	Name="Musculus biceps femoris and dissected ham ratio"	Abbrev=MBF2DH
1	chr1	268547138	268597486	8915	257944209	271800234	Name="Gait score (hind)"	Abbrev=GAITH	P-value=<0.05
1	chr1	268547138	268597486	8907	257944209	271800234	Name="Front leg conformation"	Abbrev=FRLEGC	P-value=<0.05
1	chr1	268547138	268597486	8916	257944209	271800234	Name="Physis score"	Abbrev=PHYSC	P-value=<0.05
1	chr1	268547138	268597486	80	257944209	307576631	Name="Drip loss"	Abbrev=DRIPL
1	chr1	268547138	268597486	5655	257944209	292955427	Name="Ear erectness"	Abbrev=EARER
1	chr1	268547138	268597486	9611	257944209	292955427	Name="C3c concentration"	Abbrev=C3C	P-value=<0.05
1	chr1	268547138	268597486	5456	265323610	279095904	Name="White blood cell counts"	Abbrev=WBC	P-value=<0.05
1	chr1	268547138	268597486	5461	265323610	279095904	Name="White blood cell counts"	Abbrev=WBC	P-value=<0.05
1	chr1	268547138	268597486	6352	265323610	279095904	Name="Alkaline phosphatase activity"	Abbrev=ALPA	P-value=<0.05
1	chr1	268547138	268597486	6355	265323610	279095904	Name="Alkaline phosphatase activity"	Abbrev=ALPA	P-value=<0.05
1	chr1	268547138	268597486	858	265323610	279095904	Name="Shoulder external fat weight"	Abbrev=EFATSHO
1	chr1	268547138	268597486	856	265323610	279095904	Name="Ham weight"	Abbrev=HAMWT
1	chr1	268547138	268597486	861	265323610	279095904	Name="External fat on ham"	Abbrev=EFATHAM
1	chr1	268547138	268597486	873	265323610	279095904	Name="Ham weight"	Abbrev=HAMWT
1	chr1	268547138	268597486	862	265323610	279095904	Name="Body weight (slaughter)"	Abbrev=ENDWT
1	chr1	268547138	268597486	1250	265323610	279095904	Name="Teat number"	Abbrev=TNUM
1	chr1	268547138	268597486	854	265323610	279095904	Name="Backfat weight"	Abbrev=BFW
1	chr1	268547138	268597486	857	265323610	279095904	Name="Carcass length"	Abbrev=CRCL
1	chr1	268547138	268597486	865	265323610	279095904	QName="Loin muscle area"	Abbrev=LMA
1	chr1	268547138	268597486	12726	265323610	279095904	Name="Backfat weight"	Abbrev=BFW	P-value=<0.01
1	chr1	268547138	268597486	859	265323610	279095904	Name="Loin and neck meat weight"	Abbrev=LNWT
1	chr1	268547138	268597486	823	265323610	279095904	Name="Fat-cuts percentage"	Abbrev=FATCP
1	chr1	268547138	268597486	12803	265323610	279095904	Name="Adipocyte diameter"	Abbrev=ADIPDI	P-value=<0.05
1	chr1	268547138	268597486	822	265323610	279095904	Name="Teat number"	Abbrev=TNUM
1	chr1	268547138	268597486	845	265323610	279095904	Name="Teat number"	Abbrev=TNUM
1	chr1	268547138	268597486	853	265323610	279095904	Name="Lean meat percentage"	Abbrev=LEANP
1	chr1	268547138	268597486	808	265323610	279095904	Name="Lean cuts percentage"	Abbrev=LEANCUTP
1	chr1	268547138	268597486	796	265323610	279095904	Name="Fat weight (total)"	Abbrev=FATWT
1	chr1	268547138	268597486	851	265323610	279095904	Name="Carcass length"	Abbrev=CRCL
1	chr1	268547138	268597486	852	265323610	279095904	Name="Dressing percentage"	Abbrev=DRESS%
1	chr1	268547138	268597486	1251	265323610	279095904	Name="Fat-cuts percentage"	Abbrev=FATCP
1	chr1	268547138	268597486	827	265323610	279095904	Name="Fat percentage in carcass"	Abbrev=FPIC
1	chr1	268547138	268597486	828	265323610	279095904	Name="Carcass length"	Abbrev=CRCL
1	chr1	268547138	268597486	829	265323610	279095904	Name="Fat percentage in carcass"	Abbrev=FPIC
1	chr1	268547138	268597486	863	265323610	294659146	Name="Fat-cuts percentage"	Abbrev=FATCP
1	chr1	268547138	268597486	310	266165650	277108096	Name="Average backfat thickness"	Abbrev=BFT
1	chr1	268547138	268597486	21302	266307014	287364389	Name="Thoracic vertebra number"	Abbrev=TVNUM	P-value=<0.001
1	chr1	268547138	268597486	8001	268261554	268775759	Name="Drip loss"	Abbrev=DRIPL	P-value=0.002978
1	chr1	268547138	268597486	8422	268261554	268775759	Name="Drip loss"	Abbrev=DRIPL	P-value=0.008156
1	chr1	268547138	268597486	8546	268261554	268775759	Name="Drip loss"	Abbrev=DRIPL	P-value=0.009976
1	chr1	268547138	268597486	18061	268442259	268650692	Name="Total number born alive"	Abbrev=NBA	P-value=0.01
1	chr1	275605644	275747658	5680	7964370	292955427	Name="Average daily gain (10 weeks-slaughter)"	Abbrev=ADG	P-value=<0.01
1	chr1	275605644	275747658	21209	8025530	292730648	Name="Shoulder subcutaneous fat thickness"	Abbrev=SHOUFATD	P-value=<0.05
1	chr1	275605644	275747658	21208	10067182	292041505	Name="backfat at last rib"	Abbrev=LRIBF	P-value=<0.01
1	chr1	275605644	275747658	5232	16114132	289571736	Name="Body weight (birth)"	Abbrev=BW	P-value=<0.05
1	chr1	275605644	275747658	5217	16114132	292187438	Name="Shoulder subcutaneous fat thickness"	Abbrev=SHOUFATD	P-value=<0.01
1	chr1	275605644	275747658	5237	16114132	292845492	Name="backfat above muscle dorsi"	Abbrev=SCF	P-value=<0.05
1	chr1	275605644	275747658	5262	24673417	292845492	Name="Body weight (weaning)"	Abbrev=WWT	P-value=<0.05
1	chr1	275605644	275747658	17635	32319237	289379107	Name="Front feet conformation"	Abbrev=FRFEETC
1	chr1	275605644	275747658	31809	42824511	293329173	Name="Skin thickness"	Abbrev=SKINT	P-value=<0.05
1	chr1	275605644	275747658	21206	44131186	289788010	Name="Backfat at rump"	Abbrev=BFTR	P-value=<0.01
1	chr1	275605644	275747658	21207	45762028	290786847	Name="Leaf fat weight"	Abbrev=LFW	P-value=<0.01
1	chr1	275605644	275747658	5223	45939845	292033322	Name="Teat number"	Abbrev=TNUM	P-value=<0.01
1	chr1	275605644	275747658	5206	70361295	292707685	Name="backfat at mid-back"	Abbrev=BFM	P-value=<0.01
1	chr1	275605644	275747658	5255	105873529	290457491	Name="Teat number"	Abbrev=TNUM	P-value=<0.01
1	chr1	275605644	275747658	7936	106187796	309614845	Name="Drip loss"	Abbrev=DRIPL	P-value=0.002216
1	chr1	275605644	275747658	8063	106187796	309614845	Name="Drip loss"	Abbrev=DRIPL	P-value=0.000005
1	chr1	275605644	275747658	8131	106187796	309614845	Name="Drip loss"	Abbrev=DRIPL	P-value=0.004373
1	chr1	275605644	275747658	8300	106187796	309614845	Name="Drip loss"	Abbrev=DRIPL	P-value=0.006448
1	chr1	275605644	275747658	8323	106187796	309614845	Name="Drip loss"	Abbrev=DRIPL	P-value=0.006792
1	chr1	275605644	275747658	8382	106187796	309614845	Name="Drip loss"	Abbrev=DRIPL	P-value=0.007672
1	chr1	275605644	275747658	8480	106187796	309614845	Name="Drip loss"	Abbrev=DRIPL	P-value=0.009058
1	chr1	275605644	275747658	8564	106187796	309614845	Name="Drip loss"	Abbrev=DRIPL	P-value=0.007606
1	chr1	275605644	275747658	8602	106187796	309614845	Name="Drip loss"	Abbrev=DRIPL	P-value=0.011184
1	chr1	275605644	275747658	5230	108714563	293277782	Name="Body weight (weaning)"	Abbrev=WWT	P-value=<0.01
1	chr1	275605644	275747658	8742	162275821	311704372	Name="Umbilical hernia"	Abbrev=UMBHERN	P-value=0.014
1	chr1	275605644	275747658	3914	169149638	292955427	QName="average daily gain"	Abbrev=ADG	P-value=<0.001
1	chr1	275605644	275747658	3917	169149638	292955427	Name="average daily gain"	Abbrev=ADG	P-value=0.017
1	chr1	275605644	275747658	798	204653903	279476353	Name="Backfat weight"	Abbrev=BFW
1	chr1	275605644	275747658	5681	210644363	292955427	Name="Average daily gain (entire life)"	Abbrev=ADG	P-value=<0.01
1	chr1	275605644	275747658	18019	216112266	294659146	Name="Adipocyte diameter"	Abbrev=ADIPDI
1	chr1	275605644	275747658	16833	216112266	294659146	Name="backfat at last rib"	Abbrev=LRIBF	P-value=0.0101
1	chr1	275605644	275747658	274	220801047	286501984	Name="Vertebra number"	Abbrev=VNUM	P-value=< 0.01
1	chr1	275605644	275747658	18634	228164160	306268161	Name="Fat area percentage in carcass"	Abbrev=FAPC
1	chr1	275605644	275747658	3773	228164160	292955427	Name="Meat color score"	Abbrev=mcolor	P-value=<0.05
1	chr1	275605644	275747658	21353	228164160	286501984	Name="Spareribs weight"	Abbrev=SPARERIB	P-value=4.37E-6
1	chr1	275605644	275747658	3223	228164160	286501984	Name="Spareribs weight"	Abbrev=SPARERIB
1	chr1	275605644	275747658	2794	242497921	292955427	Name="Percentage type I fibers"	Abbrev=FIB1P
1	chr1	275605644	275747658	2795	242497921	292955427	Name="Diameter of type IIb muscle fibers"	Abbrev=FIB2BDIAM
1	chr1	275605644	275747658	80	257944209	307576631	Name="Drip loss"	Abbrev=DRIPL
1	chr1	275605644	275747658	5655	257944209	292955427	Name="Ear erectness"	Abbrev=EARER
1	chr1	275605644	275747658	9611	257944209	292955427	Name="C3c concentration"	Abbrev=C3C	P-value=<0.05
1	chr1	275605644	275747658	5456	265323610	279095904	Name="White blood cell counts"	Abbrev=WBC	P-value=<0.05
1	chr1	275605644	275747658	5461	265323610	279095904	Name="White blood cell counts"	Abbrev=WBC	P-value=<0.05
1	chr1	275605644	275747658	6352	265323610	279095904	Name="Alkaline phosphatase activity"	Abbrev=ALPA	P-value=<0.05
1	chr1	275605644	275747658	6355	265323610	279095904	Name="Alkaline phosphatase activity"	Abbrev=ALPA	P-value=<0.05
1	chr1	275605644	275747658	858	265323610	279095904	Name="Shoulder external fat weight"	Abbrev=EFATSHO
1	chr1	275605644	275747658	856	265323610	279095904	Name="Ham weight"	Abbrev=HAMWT
1	chr1	275605644	275747658	861	265323610	279095904	Name="External fat on ham"	Abbrev=EFATHAM
1	chr1	275605644	275747658	873	265323610	279095904	Name="Ham weight"	Abbrev=HAMWT
1	chr1	275605644	275747658	862	265323610	279095904	Name="Body weight (slaughter)"	Abbrev=ENDWT
1	chr1	275605644	275747658	1250	265323610	279095904	Name="Teat number"	Abbrev=TNUM
1	chr1	275605644	275747658	854	265323610	279095904	Name="Backfat weight"	Abbrev=BFW
1	chr1	275605644	275747658	857	265323610	279095904	Name="Carcass length"	Abbrev=CRCL
1	chr1	275605644	275747658	865	265323610	279095904	QName="Loin muscle area"	Abbrev=LMA
1	chr1	275605644	275747658	12726	265323610	279095904	Name="Backfat weight"	Abbrev=BFW	P-value=<0.01
1	chr1	275605644	275747658	859	265323610	279095904	Name="Loin and neck meat weight"	Abbrev=LNWT
1	chr1	275605644	275747658	823	265323610	279095904	Name="Fat-cuts percentage"	Abbrev=FATCP
1	chr1	275605644	275747658	12803	265323610	279095904	Name="Adipocyte diameter"	Abbrev=ADIPDI	P-value=<0.05
1	chr1	275605644	275747658	822	265323610	279095904	Name="Teat number"	Abbrev=TNUM
1	chr1	275605644	275747658	845	265323610	279095904	Name="Teat number"	Abbrev=TNUM
1	chr1	275605644	275747658	853	265323610	279095904	Name="Lean meat percentage"	Abbrev=LEANP
1	chr1	275605644	275747658	808	265323610	279095904	Name="Lean cuts percentage"	Abbrev=LEANCUTP
1	chr1	275605644	275747658	796	265323610	279095904	Name="Fat weight (total)"	Abbrev=FATWT
1	chr1	275605644	275747658	851	265323610	279095904	Name="Carcass length"	Abbrev=CRCL
1	chr1	275605644	275747658	852	265323610	279095904	Name="Dressing percentage"	Abbrev=DRESS%
1	chr1	275605644	275747658	1251	265323610	279095904	Name="Fat-cuts percentage"	Abbrev=FATCP
1	chr1	275605644	275747658	827	265323610	279095904	Name="Fat percentage in carcass"	Abbrev=FPIC
1	chr1	275605644	275747658	828	265323610	279095904	Name="Carcass length"	Abbrev=CRCL
1	chr1	275605644	275747658	829	265323610	279095904	Name="Fat percentage in carcass"	Abbrev=FPIC
1	chr1	275605644	275747658	863	265323610	294659146	Name="Fat-cuts percentage"	Abbrev=FATCP
1	chr1	275605644	275747658	310	266165650	277108096	Name="Average backfat thickness"	Abbrev=BFT
1	chr1	275605644	275747658	21302	266307014	287364389	Name="Thoracic vertebra number"	Abbrev=TVNUM	P-value=<0.001
1	chr1	275605644	275747658	21204	268926929	290883097	Name="Average backfat thickness"	Abbrev=BFT	P-value=<0.01
1	chr1	275605644	275747658	5216	271512220	292845492	Name="Shoulder subcutaneous fat thickness"	Abbrev=SHOUFATD	P-value=<0.01
1	chr1	275605644	275747658	2840	271800234	292955427	Name="Loin weight"	Abbrev=LOINWT
1	chr1	275605644	275747658	21210	271800234	291609299	Name="intestinal fat weight"	Abbrev=CFW	P-value=<0.01
1	chr1	275605644	275747658	16	271800234	306268161	Name="Trimmed wholesale product / carcass weight"	Abbrev=TWPCWT
1	chr1	275605644	275747658	35	271800234	306268161	Name="Average backfat thickness"	Abbrev=BFT
1	chr1	275605644	275747658	3169	271800234	306268161	Name="pH for Longissmus Dorsi"	Abbrev=pH	P-value=0.05
1	chr1	275605644	275747658	3170	271800234	306268161	Name="pH for Biceps Femoris"	Abbrev=pH	P-value=0.00005
1	chr1	275605644	275747658	3168	271800234	306268161	Name="pH for Semispinalis Dorsi"	Abbrev=pH	P-value=0.05
1	chr1	275605644	275747658	8815	271800234	292955427	Name="Age at puberty"	Abbrev=AGEP	P-value=<0.05
1	chr1	275605644	275747658	3147	271800234	306268161	Name="Loin weight"	Abbrev=LOINWT	P-value=0.00005
1	chr1	275605644	275747658	659	271800234	307576631	Name="average daily gain (3-10 weeks)"	Abbrev=ADG
1	chr1	275605644	275747658	660	271800234	307576631	Name="body weight (10 weeks)"	Abbrev=Wt
1	chr1	275605644	275747658	661	271800234	307576631	Name="body weight (13 weeks)"	Abbrev=Wt
1	chr1	275605644	275747658	662	271800234	307576631	Name="body weight (17 weeks)"	Abbrev=Wt
1	chr1	275605644	275747658	3132	271800234	306268161	Name="Trimmed wholesale product / live weight"	Abbrev=TWPLWT	P-value=0.00005
1	chr1	275605644	275747658	3133	271800234	306268161	Name="average daily gain"	Abbrev=ADG	P-value=0.0005
1	chr1	275605644	275747658	3145	271800234	306268161	Name="Backfat (average) thickness - ultrasound"	Abbrev=BFT	P-value=0.00005
1	chr1	275605644	275747658	3148	271800234	306268161	Name="Ham weight"	Abbrev=HAMWT	P-value=0.0005
1	chr1	275605644	275747658	3149	271800234	306268161	Name="Backfat weight"	Abbrev=BFW	P-value=0.05
1	chr1	275605644	275747658	3150	271800234	306268161	Name="Lean meat percentage"	Abbrev=LEANP	P-value=0.00005
1	chr1	275605644	275747658	5930	274130998	292955427	Name="Average daily gain (entire life)"	Abbrev=ADG	P-value=<0.01
1	chr1	275605644	275747658	2931	274130998	292955427	Name="Marbling"	Abbrev=MARB	P-value=0.003
1	chr1	275605644	275747658	446	274130998	292955427	Name="average daily gain (weaning-55 kg)"	Abbrev=ADG	P-value=0.0000
1	chr1	275605644	275747658	447	274130998	292955427	Name="average daily gain (birth-end of test)"	Abbrev=ADG	P-value=0.0002
1	chr1	275605644	275747658	448	274130998	292955427	Name="average daily gain (35-55 kg)"	Abbrev=ADG	P-value=0.0008
1	chr1	284443528	284486575	5680	7964370	292955427	Name="Average daily gain (10 weeks-slaughter)"	Abbrev=ADG	P-value=<0.01
1	chr1	284443528	284486575	21209	8025530	292730648	Name="Shoulder subcutaneous fat thickness"	Abbrev=SHOUFATD	P-value=<0.05
1	chr1	284443528	284486575	21208	10067182	292041505	Name="backfat at last rib"	Abbrev=LRIBF	P-value=<0.01
1	chr1	284443528	284486575	5232	16114132	289571736	Name="Body weight (birth)"	Abbrev=BW	P-value=<0.05
1	chr1	284443528	284486575	5217	16114132	292187438	Name="Shoulder subcutaneous fat thickness"	Abbrev=SHOUFATD	P-value=<0.01
1	chr1	284443528	284486575	5237	16114132	292845492	Name="backfat above muscle dorsi"	Abbrev=SCF	P-value=<0.05
1	chr1	284443528	284486575	5262	24673417	292845492	Name="Body weight (weaning)"	Abbrev=WWT	P-value=<0.05
1	chr1	284443528	284486575	17635	32319237	289379107	Name="Front feet conformation"	Abbrev=FRFEETC
1	chr1	284443528	284486575	31809	42824511	293329173	Name="Skin thickness"	Abbrev=SKINT	P-value=<0.05
1	chr1	284443528	284486575	21206	44131186	289788010	Name="Backfat at rump"	Abbrev=BFTR	P-value=<0.01
1	chr1	284443528	284486575	21207	45762028	290786847	Name="Leaf fat weight"	Abbrev=LFW	P-value=<0.01
1	chr1	284443528	284486575	5223	45939845	292033322	Name="Teat number"	Abbrev=TNUM	P-value=<0.01
1	chr1	284443528	284486575	5206	70361295	292707685	Name="backfat at mid-back"	Abbrev=BFM	P-value=<0.01
1	chr1	284443528	284486575	5255	105873529	290457491	Name="Teat number"	Abbrev=TNUM	P-value=<0.01
1	chr1	284443528	284486575	7936	106187796	309614845	Name="Drip loss"	Abbrev=DRIPL	P-value=0.002216
1	chr1	284443528	284486575	8063	106187796	309614845	Name="Drip loss"	Abbrev=DRIPL	P-value=0.000005
1	chr1	284443528	284486575	8131	106187796	309614845	Name="Drip loss"	Abbrev=DRIPL	P-value=0.004373
1	chr1	284443528	284486575	8300	106187796	309614845	Name="Drip loss"	Abbrev=DRIPL	P-value=0.006448
1	chr1	284443528	284486575	8323	106187796	309614845	Name="Drip loss"	Abbrev=DRIPL	P-value=0.006792
1	chr1	284443528	284486575	8382	106187796	309614845	Name="Drip loss"	Abbrev=DRIPL	P-value=0.007672
1	chr1	284443528	284486575	8480	106187796	309614845	Name="Drip loss"	Abbrev=DRIPL	P-value=0.009058
1	chr1	284443528	284486575	8564	106187796	309614845	Name="Drip loss"	Abbrev=DRIPL	P-value=0.007606
1	chr1	284443528	284486575	8602	106187796	309614845	Name="Drip loss"	Abbrev=DRIPL	P-value=0.011184
1	chr1	284443528	284486575	5230	108714563	293277782	Name="Body weight (weaning)"	Abbrev=WWT	P-value=<0.01
1	chr1	284443528	284486575	8742	162275821	311704372	Name="Umbilical hernia"	Abbrev=UMBHERN	P-value=0.014
1	chr1	284443528	284486575	3914	169149638	292955427	QName="average daily gain"	Abbrev=ADG	P-value=<0.001
1	chr1	284443528	284486575	3917	169149638	292955427	Name="average daily gain"	Abbrev=ADG	P-value=0.017
1	chr1	284443528	284486575	5681	210644363	292955427	Name="Average daily gain (entire life)"	Abbrev=ADG	P-value=<0.01
1	chr1	284443528	284486575	18019	216112266	294659146	Name="Adipocyte diameter"	Abbrev=ADIPDI
1	chr1	284443528	284486575	16833	216112266	294659146	Name="backfat at last rib"	Abbrev=LRIBF	P-value=0.0101
1	chr1	284443528	284486575	274	220801047	286501984	Name="Vertebra number"	Abbrev=VNUM	P-value=< 0.01
1	chr1	284443528	284486575	18634	228164160	306268161	Name="Fat area percentage in carcass"	Abbrev=FAPC
1	chr1	284443528	284486575	3773	228164160	292955427	Name="Meat color score"	Abbrev=mcolor	P-value=<0.05
1	chr1	284443528	284486575	21353	228164160	286501984	Name="Spareribs weight"	Abbrev=SPARERIB	P-value=4.37E-6
1	chr1	284443528	284486575	3223	228164160	286501984	Name="Spareribs weight"	Abbrev=SPARERIB
1	chr1	284443528	284486575	2794	242497921	292955427	Name="Percentage type I fibers"	Abbrev=FIB1P
1	chr1	284443528	284486575	2795	242497921	292955427	Name="Diameter of type IIb muscle fibers"	Abbrev=FIB2BDIAM
1	chr1	284443528	284486575	80	257944209	307576631	Name="Drip loss"	Abbrev=DRIPL
1	chr1	284443528	284486575	5655	257944209	292955427	Name="Ear erectness"	Abbrev=EARER
1	chr1	284443528	284486575	9611	257944209	292955427	Name="C3c concentration"	Abbrev=C3C	P-value=<0.05
1	chr1	284443528	284486575	863	265323610	294659146	Name="Fat-cuts percentage"	Abbrev=FATCP
1	chr1	284443528	284486575	21302	266307014	287364389	Name="Thoracic vertebra number"	Abbrev=TVNUM	P-value=<0.001
1	chr1	284443528	284486575	21204	268926929	290883097	Name="Average backfat thickness"	Abbrev=BFT	P-value=<0.01
1	chr1	284443528	284486575	5216	271512220	292845492	Name="Shoulder subcutaneous fat thickness"	Abbrev=SHOUFATD	P-value=<0.01
1	chr1	284443528	284486575	2840	271800234	292955427	Name="Loin weight"	Abbrev=LOINWT
1	chr1	284443528	284486575	21210	271800234	291609299	Name="intestinal fat weight"	Abbrev=CFW	P-value=<0.01
1	chr1	284443528	284486575	16	271800234	306268161	Name="Trimmed wholesale product / carcass weight"	Abbrev=TWPCWT
1	chr1	284443528	284486575	35	271800234	306268161	Name="Average backfat thickness"	Abbrev=BFT
1	chr1	284443528	284486575	3169	271800234	306268161	Name="pH for Longissmus Dorsi"	Abbrev=pH	P-value=0.05
1	chr1	284443528	284486575	3170	271800234	306268161	Name="pH for Biceps Femoris"	Abbrev=pH	P-value=0.00005
1	chr1	284443528	284486575	3168	271800234	306268161	Name="pH for Semispinalis Dorsi"	Abbrev=pH	P-value=0.05
1	chr1	284443528	284486575	8815	271800234	292955427	Name="Age at puberty"	Abbrev=AGEP	P-value=<0.05
1	chr1	284443528	284486575	3147	271800234	306268161	Name="Loin weight"	Abbrev=LOINWT	P-value=0.00005
1	chr1	284443528	284486575	659	271800234	307576631	Name="average daily gain (3-10 weeks)"	Abbrev=ADG
1	chr1	284443528	284486575	660	271800234	307576631	Name="body weight (10 weeks)"	Abbrev=Wt
1	chr1	284443528	284486575	661	271800234	307576631	Name="body weight (13 weeks)"	Abbrev=Wt
1	chr1	284443528	284486575	662	271800234	307576631	Name="body weight (17 weeks)"	Abbrev=Wt
1	chr1	284443528	284486575	3132	271800234	306268161	Name="Trimmed wholesale product / live weight"	Abbrev=TWPLWT	P-value=0.00005
1	chr1	284443528	284486575	3133	271800234	306268161	Name="average daily gain"	Abbrev=ADG	P-value=0.0005
1	chr1	284443528	284486575	3145	271800234	306268161	Name="Backfat (average) thickness - ultrasound"	Abbrev=BFT	P-value=0.00005
1	chr1	284443528	284486575	3148	271800234	306268161	Name="Ham weight"	Abbrev=HAMWT	P-value=0.0005
1	chr1	284443528	284486575	3149	271800234	306268161	Name="Backfat weight"	Abbrev=BFW	P-value=0.05
1	chr1	284443528	284486575	3150	271800234	306268161	Name="Lean meat percentage"	Abbrev=LEANP	P-value=0.00005
1	chr1	284443528	284486575	5930	274130998	292955427	Name="Average daily gain (entire life)"	Abbrev=ADG	P-value=<0.01
1	chr1	284443528	284486575	2931	274130998	292955427	Name="Marbling"	Abbrev=MARB	P-value=0.003
1	chr1	284443528	284486575	446	274130998	292955427	Name="average daily gain (weaning-55 kg)"	Abbrev=ADG	P-value=0.0000
1	chr1	284443528	284486575	447	274130998	292955427	Name="average daily gain (birth-end of test)"	Abbrev=ADG	P-value=0.0002
1	chr1	284443528	284486575	448	274130998	292955427	Name="average daily gain (35-55 kg)"	Abbrev=ADG	P-value=0.0008
1	chr1	284443528	284486575	4	277108096	306268161	Name="Loin muscle area"	Abbrev=LMA
1	chr1	284443528	284486575	7232	277440504	280195684	Name="Vertebra number"	Abbrev=VNUM
1	chr1	284443528	284486575	21205	277978209	291709412	Name="Backfat at first rib"	Abbrev=1RIBBFT	P-value=<0.01
1	chr1	284443528	284486575	12739	279095904	294659146	Name="Fat to meat ratio"	Abbrev=FMR	P-value=<0.01
1	chr1	284443528	284486575	30	279095904	306268161	Name="Backfat at last lumbar"	Abbrev=LUMBF
1	chr1	284443528	284486575	847	279095904	294659146	Name="Conductivity 24 hours post-mortem"	Abbrev=COND
1	chr1	284443528	284486575	12727	279095904	294659146	Name="Fat-cuts percentage"	Abbrev=FATCP	P-value=<0.05
1	chr1	284443528	284486575	27	279095904	306268161	Name="backfat at last rib"	Abbrev=LRIBF
1	chr1	284443528	284486575	824	279095904	294659146	Name="Lean meat percentage"	Abbrev=LEANP
1	chr1	284443528	284486575	5250	279476353	292955427	Name="Shoulder subcutaneous fat thickness"	Abbrev=SHOUFATD	P-value=<0.01
1	chr1	284443528	284486575	13	280547030	306268161	Name="Trimmed wholesale product / live weight"	Abbrev=TWPLWT
1	chr1	284443528	284486575	23	280547030	303972175	Name="Backfat at tenth rib"	Abbrev=10RIBBFT
1	chr1	284443528	284486575	6463	280924929	284793582	Name="Left teat number"	Abbrev=LTNUM	P-value=<0.01
1	chr1	284443528	284486575	6480	280924929	284793582	Name="Teat number"	Abbrev=TNUM	P-value=<0.01
1	chr1	294821198	294867674	7936	106187796	309614845	Name="Drip loss"	Abbrev=DRIPL	P-value=0.002216
1	chr1	294821198	294867674	8063	106187796	309614845	Name="Drip loss"	Abbrev=DRIPL	P-value=0.000005
1	chr1	294821198	294867674	8131	106187796	309614845	Name="Drip loss"	Abbrev=DRIPL	P-value=0.004373
1	chr1	294821198	294867674	8300	106187796	309614845	Name="Drip loss"	Abbrev=DRIPL	P-value=0.006448
1	chr1	294821198	294867674	8323	106187796	309614845	Name="Drip loss"	Abbrev=DRIPL	P-value=0.006792
1	chr1	294821198	294867674	8382	106187796	309614845	Name="Drip loss"	Abbrev=DRIPL	P-value=0.007672
1	chr1	294821198	294867674	8480	106187796	309614845	Name="Drip loss"	Abbrev=DRIPL	P-value=0.009058
1	chr1	294821198	294867674	8564	106187796	309614845	Name="Drip loss"	Abbrev=DRIPL	P-value=0.007606
1	chr1	294821198	294867674	8602	106187796	309614845	Name="Drip loss"	Abbrev=DRIPL	P-value=0.011184
1	chr1	294821198	294867674	8742	162275821	311704372	Name="Umbilical hernia"	Abbrev=UMBHERN	P-value=0.014
1	chr1	294821198	294867674	18634	228164160	306268161	Name="Fat area percentage in carcass"	Abbrev=FAPC
1	chr1	294821198	294867674	80	257944209	307576631	Name="Drip loss"	Abbrev=DRIPL
1	chr1	294821198	294867674	16	271800234	306268161	Name="Trimmed wholesale product / carcass weight"	Abbrev=TWPCWT
1	chr1	294821198	294867674	35	271800234	306268161	Name="Average backfat thickness"	Abbrev=BFT
1	chr1	294821198	294867674	3169	271800234	306268161	Name="pH for Longissmus Dorsi"	Abbrev=pH	P-value=0.05
1	chr1	294821198	294867674	3170	271800234	306268161	Name="pH for Biceps Femoris"	Abbrev=pH	P-value=0.00005
1	chr1	294821198	294867674	3168	271800234	306268161	Name="pH for Semispinalis Dorsi"	Abbrev=pH	P-value=0.05
1	chr1	294821198	294867674	3147	271800234	306268161	Name="Loin weight"	Abbrev=LOINWT	P-value=0.00005
1	chr1	294821198	294867674	659	271800234	307576631	Name="average daily gain (3-10 weeks)"	Abbrev=ADG
1	chr1	294821198	294867674	660	271800234	307576631	Name="body weight (10 weeks)"	Abbrev=Wt
1	chr1	294821198	294867674	661	271800234	307576631	Name="body weight (13 weeks)"	Abbrev=Wt
1	chr1	294821198	294867674	662	271800234	307576631	Name="body weight (17 weeks)"	Abbrev=Wt
1	chr1	294821198	294867674	3132	271800234	306268161	Name="Trimmed wholesale product / live weight"	Abbrev=TWPLWT	P-value=0.00005
1	chr1	294821198	294867674	3133	271800234	306268161	Name="average daily gain"	Abbrev=ADG	P-value=0.0005
1	chr1	294821198	294867674	3145	271800234	306268161	Name="Backfat (average) thickness - ultrasound"	Abbrev=BFT	P-value=0.00005
1	chr1	294821198	294867674	3148	271800234	306268161	Name="Ham weight"	Abbrev=HAMWT	P-value=0.0005
1	chr1	294821198	294867674	3149	271800234	306268161	Name="Backfat weight"	Abbrev=BFW	P-value=0.05
1	chr1	294821198	294867674	3150	271800234	306268161	Name="Lean meat percentage"	Abbrev=LEANP	P-value=0.00005
1	chr1	294821198	294867674	4	277108096	306268161	Name="Loin muscle area"	Abbrev=LMA
1	chr1	294821198	294867674	30	279095904	306268161	Name="Backfat at last lumbar"	Abbrev=LUMBF
1	chr1	294821198	294867674	27	279095904	306268161	Name="backfat at last rib"	Abbrev=LRIBF
1	chr1	294821198	294867674	13	280547030	306268161	Name="Trimmed wholesale product / live weight"	Abbrev=TWPLWT
1	chr1	294821198	294867674	23	280547030	303972175	Name="Backfat at tenth rib"	Abbrev=10RIBBFT
1	chr1	294821198	294867674	169	290462910	301130831	Name="body weight (13 weeks)"	Abbrev=Wt
1	chr1	294821198	294867674	401	292695065	307576631	Name="Backfat weight"	Abbrev=BFW
1	chr1	294821198	294867674	376	293329173	311724687	Name="Ham weight"	Abbrev=HAMWT	P-value=<0.0
1	chr1	294821198	294867674	375	294756973	311724687	Name="Loin weight"	Abbrev=LOINWT	P-value=<0.001
1	chr1	294821198	294867674	402	294756973	311724687	Name="Leaf fat weight"	Abbrev=LFW	P-value=<0.05
1	chr1	295241692	295462741	7936	106187796	309614845	Name="Drip loss"	Abbrev=DRIPL	P-value=0.002216
1	chr1	295241692	295462741	8063	106187796	309614845	Name="Drip loss"	Abbrev=DRIPL	P-value=0.000005
1	chr1	295241692	295462741	8131	106187796	309614845	Name="Drip loss"	Abbrev=DRIPL	P-value=0.004373
1	chr1	295241692	295462741	8300	106187796	309614845	Name="Drip loss"	Abbrev=DRIPL	P-value=0.006448
1	chr1	295241692	295462741	8323	106187796	309614845	Name="Drip loss"	Abbrev=DRIPL	P-value=0.006792
1	chr1	295241692	295462741	8382	106187796	309614845	Name="Drip loss"	Abbrev=DRIPL	P-value=0.007672
1	chr1	295241692	295462741	8480	106187796	309614845	Name="Drip loss"	Abbrev=DRIPL	P-value=0.009058
1	chr1	295241692	295462741	8564	106187796	309614845	Name="Drip loss"	Abbrev=DRIPL	P-value=0.007606
1	chr1	295241692	295462741	8602	106187796	309614845	Name="Drip loss"	Abbrev=DRIPL	P-value=0.011184
1	chr1	295241692	295462741	8742	162275821	311704372	Name="Umbilical hernia"	Abbrev=UMBHERN	P-value=0.014
1	chr1	295241692	295462741	18634	228164160	306268161	Name="Fat area percentage in carcass"	Abbrev=FAPC
1	chr1	295241692	295462741	80	257944209	307576631	Name="Drip loss"	Abbrev=DRIPL
1	chr1	295241692	295462741	16	271800234	306268161	Name="Trimmed wholesale product / carcass weight"	Abbrev=TWPCWT
1	chr1	295241692	295462741	35	271800234	306268161	Name="Average backfat thickness"	Abbrev=BFT
1	chr1	295241692	295462741	3169	271800234	306268161	Name="pH for Longissmus Dorsi"	Abbrev=pH	P-value=0.05
1	chr1	295241692	295462741	3170	271800234	306268161	Name="pH for Biceps Femoris"	Abbrev=pH	P-value=0.00005
1	chr1	295241692	295462741	3168	271800234	306268161	Name="pH for Semispinalis Dorsi"	Abbrev=pH	P-value=0.05
1	chr1	295241692	295462741	3147	271800234	306268161	Name="Loin weight"	Abbrev=LOINWT	P-value=0.00005
1	chr1	295241692	295462741	659	271800234	307576631	Name="average daily gain (3-10 weeks)"	Abbrev=ADG
1	chr1	295241692	295462741	660	271800234	307576631	Name="body weight (10 weeks)"	Abbrev=Wt
1	chr1	295241692	295462741	661	271800234	307576631	Name="body weight (13 weeks)"	Abbrev=Wt
1	chr1	295241692	295462741	662	271800234	307576631	Name="body weight (17 weeks)"	Abbrev=Wt
1	chr1	295241692	295462741	3132	271800234	306268161	Name="Trimmed wholesale product / live weight"	Abbrev=TWPLWT	P-value=0.00005
1	chr1	295241692	295462741	3133	271800234	306268161	Name="average daily gain"	Abbrev=ADG	P-value=0.0005
1	chr1	295241692	295462741	3145	271800234	306268161	Name="Backfat (average) thickness - ultrasound"	Abbrev=BFT	P-value=0.00005
1	chr1	295241692	295462741	3148	271800234	306268161	Name="Ham weight"	Abbrev=HAMWT	P-value=0.0005
1	chr1	295241692	295462741	3149	271800234	306268161	Name="Backfat weight"	Abbrev=BFW	P-value=0.05
1	chr1	295241692	295462741	3150	271800234	306268161	Name="Lean meat percentage"	Abbrev=LEANP	P-value=0.00005
1	chr1	295241692	295462741	4	277108096	306268161	Name="Loin muscle area"	Abbrev=LMA
1	chr1	295241692	295462741	30	279095904	306268161	Name="Backfat at last lumbar"	Abbrev=LUMBF
1	chr1	295241692	295462741	27	279095904	306268161	Name="backfat at last rib"	Abbrev=LRIBF
1	chr1	295241692	295462741	13	280547030	306268161	Name="Trimmed wholesale product / live weight"	Abbrev=TWPLWT
1	chr1	295241692	295462741	23	280547030	303972175	Name="Backfat at tenth rib"	Abbrev=10RIBBFT
1	chr1	295241692	295462741	169	290462910	301130831	Name="body weight (13 weeks)"	Abbrev=Wt
1	chr1	295241692	295462741	401	292695065	307576631	Name="Backfat weight"	Abbrev=BFW
1	chr1	295241692	295462741	376	293329173	311724687	Name="Ham weight"	Abbrev=HAMWT	P-value=<0.0
1	chr1	295241692	295462741	375	294756973	311724687	Name="Loin weight"	Abbrev=LOINWT	P-value=<0.001
1	chr1	295241692	295462741	402	294756973	311724687	Name="Leaf fat weight"	Abbrev=LFW	P-value=<0.05
1	chr1	296616443	296747604	7936	106187796	309614845	Name="Drip loss"	Abbrev=DRIPL	P-value=0.002216
1	chr1	296616443	296747604	8063	106187796	309614845	Name="Drip loss"	Abbrev=DRIPL	P-value=0.000005
1	chr1	296616443	296747604	8131	106187796	309614845	Name="Drip loss"	Abbrev=DRIPL	P-value=0.004373
1	chr1	296616443	296747604	8300	106187796	309614845	Name="Drip loss"	Abbrev=DRIPL	P-value=0.006448
1	chr1	296616443	296747604	8323	106187796	309614845	Name="Drip loss"	Abbrev=DRIPL	P-value=0.006792
1	chr1	296616443	296747604	8382	106187796	309614845	Name="Drip loss"	Abbrev=DRIPL	P-value=0.007672
1	chr1	296616443	296747604	8480	106187796	309614845	Name="Drip loss"	Abbrev=DRIPL	P-value=0.009058
1	chr1	296616443	296747604	8564	106187796	309614845	Name="Drip loss"	Abbrev=DRIPL	P-value=0.007606
1	chr1	296616443	296747604	8602	106187796	309614845	Name="Drip loss"	Abbrev=DRIPL	P-value=0.011184
1	chr1	296616443	296747604	8742	162275821	311704372	Name="Umbilical hernia"	Abbrev=UMBHERN	P-value=0.014
1	chr1	296616443	296747604	18634	228164160	306268161	Name="Fat area percentage in carcass"	Abbrev=FAPC
1	chr1	296616443	296747604	80	257944209	307576631	Name="Drip loss"	Abbrev=DRIPL
1	chr1	296616443	296747604	16	271800234	306268161	Name="Trimmed wholesale product / carcass weight"	Abbrev=TWPCWT
1	chr1	296616443	296747604	35	271800234	306268161	Name="Average backfat thickness"	Abbrev=BFT
1	chr1	296616443	296747604	3169	271800234	306268161	Name="pH for Longissmus Dorsi"	Abbrev=pH	P-value=0.05
1	chr1	296616443	296747604	3170	271800234	306268161	Name="pH for Biceps Femoris"	Abbrev=pH	P-value=0.00005
1	chr1	296616443	296747604	3168	271800234	306268161	Name="pH for Semispinalis Dorsi"	Abbrev=pH	P-value=0.05
1	chr1	296616443	296747604	3147	271800234	306268161	Name="Loin weight"	Abbrev=LOINWT	P-value=0.00005
1	chr1	296616443	296747604	659	271800234	307576631	Name="average daily gain (3-10 weeks)"	Abbrev=ADG
1	chr1	296616443	296747604	660	271800234	307576631	Name="body weight (10 weeks)"	Abbrev=Wt
1	chr1	296616443	296747604	661	271800234	307576631	Name="body weight (13 weeks)"	Abbrev=Wt
1	chr1	296616443	296747604	662	271800234	307576631	Name="body weight (17 weeks)"	Abbrev=Wt
1	chr1	296616443	296747604	3132	271800234	306268161	Name="Trimmed wholesale product / live weight"	Abbrev=TWPLWT	P-value=0.00005
1	chr1	296616443	296747604	3133	271800234	306268161	Name="average daily gain"	Abbrev=ADG	P-value=0.0005
1	chr1	296616443	296747604	3145	271800234	306268161	Name="Backfat (average) thickness - ultrasound"	Abbrev=BFT	P-value=0.00005
1	chr1	296616443	296747604	3148	271800234	306268161	Name="Ham weight"	Abbrev=HAMWT	P-value=0.0005
1	chr1	296616443	296747604	3149	271800234	306268161	Name="Backfat weight"	Abbrev=BFW	P-value=0.05
1	chr1	296616443	296747604	3150	271800234	306268161	Name="Lean meat percentage"	Abbrev=LEANP	P-value=0.00005
1	chr1	296616443	296747604	4	277108096	306268161	Name="Loin muscle area"	Abbrev=LMA
1	chr1	296616443	296747604	30	279095904	306268161	Name="Backfat at last lumbar"	Abbrev=LUMBF
1	chr1	296616443	296747604	27	279095904	306268161	Name="backfat at last rib"	Abbrev=LRIBF
1	chr1	296616443	296747604	13	280547030	306268161	Name="Trimmed wholesale product / live weight"	Abbrev=TWPLWT
1	chr1	296616443	296747604	23	280547030	303972175	Name="Backfat at tenth rib"	Abbrev=10RIBBFT
1	chr1	296616443	296747604	169	290462910	301130831	Name="body weight (13 weeks)"	Abbrev=Wt
1	chr1	296616443	296747604	401	292695065	307576631	Name="Backfat weight"	Abbrev=BFW
1	chr1	296616443	296747604	376	293329173	311724687	Name="Ham weight"	Abbrev=HAMWT	P-value=<0.0
1	chr1	296616443	296747604	375	294756973	311724687	Name="Loin weight"	Abbrev=LOINWT	P-value=<0.001
1	chr1	296616443	296747604	402	294756973	311724687	Name="Leaf fat weight"	Abbrev=LFW	P-value=<0.05
1	chr1	296787813	296854248	7936	106187796	309614845	Name="Drip loss"	Abbrev=DRIPL	P-value=0.002216
1	chr1	296787813	296854248	8063	106187796	309614845	Name="Drip loss"	Abbrev=DRIPL	P-value=0.000005
1	chr1	296787813	296854248	8131	106187796	309614845	Name="Drip loss"	Abbrev=DRIPL	P-value=0.004373
1	chr1	296787813	296854248	8300	106187796	309614845	Name="Drip loss"	Abbrev=DRIPL	P-value=0.006448
1	chr1	296787813	296854248	8323	106187796	309614845	Name="Drip loss"	Abbrev=DRIPL	P-value=0.006792
1	chr1	296787813	296854248	8382	106187796	309614845	Name="Drip loss"	Abbrev=DRIPL	P-value=0.007672
1	chr1	296787813	296854248	8480	106187796	309614845	Name="Drip loss"	Abbrev=DRIPL	P-value=0.009058
1	chr1	296787813	296854248	8564	106187796	309614845	Name="Drip loss"	Abbrev=DRIPL	P-value=0.007606
1	chr1	296787813	296854248	8602	106187796	309614845	Name="Drip loss"	Abbrev=DRIPL	P-value=0.011184
1	chr1	296787813	296854248	8742	162275821	311704372	Name="Umbilical hernia"	Abbrev=UMBHERN	P-value=0.014
1	chr1	296787813	296854248	18634	228164160	306268161	Name="Fat area percentage in carcass"	Abbrev=FAPC
1	chr1	296787813	296854248	80	257944209	307576631	Name="Drip loss"	Abbrev=DRIPL
1	chr1	296787813	296854248	16	271800234	306268161	Name="Trimmed wholesale product / carcass weight"	Abbrev=TWPCWT
1	chr1	296787813	296854248	35	271800234	306268161	Name="Average backfat thickness"	Abbrev=BFT
1	chr1	296787813	296854248	3169	271800234	306268161	Name="pH for Longissmus Dorsi"	Abbrev=pH	P-value=0.05
1	chr1	296787813	296854248	3170	271800234	306268161	Name="pH for Biceps Femoris"	Abbrev=pH	P-value=0.00005
1	chr1	296787813	296854248	3168	271800234	306268161	Name="pH for Semispinalis Dorsi"	Abbrev=pH	P-value=0.05
1	chr1	296787813	296854248	3147	271800234	306268161	Name="Loin weight"	Abbrev=LOINWT	P-value=0.00005
1	chr1	296787813	296854248	659	271800234	307576631	Name="average daily gain (3-10 weeks)"	Abbrev=ADG
1	chr1	296787813	296854248	660	271800234	307576631	Name="body weight (10 weeks)"	Abbrev=Wt
1	chr1	296787813	296854248	661	271800234	307576631	Name="body weight (13 weeks)"	Abbrev=Wt
1	chr1	296787813	296854248	662	271800234	307576631	Name="body weight (17 weeks)"	Abbrev=Wt
1	chr1	296787813	296854248	3132	271800234	306268161	Name="Trimmed wholesale product / live weight"	Abbrev=TWPLWT	P-value=0.00005
1	chr1	296787813	296854248	3133	271800234	306268161	Name="average daily gain"	Abbrev=ADG	P-value=0.0005
1	chr1	296787813	296854248	3145	271800234	306268161	Name="Backfat (average) thickness - ultrasound"	Abbrev=BFT	P-value=0.00005
1	chr1	296787813	296854248	3148	271800234	306268161	Name="Ham weight"	Abbrev=HAMWT	P-value=0.0005
1	chr1	296787813	296854248	3149	271800234	306268161	Name="Backfat weight"	Abbrev=BFW	P-value=0.05
1	chr1	296787813	296854248	3150	271800234	306268161	Name="Lean meat percentage"	Abbrev=LEANP	P-value=0.00005
1	chr1	296787813	296854248	4	277108096	306268161	Name="Loin muscle area"	Abbrev=LMA
1	chr1	296787813	296854248	30	279095904	306268161	Name="Backfat at last lumbar"	Abbrev=LUMBF
1	chr1	296787813	296854248	27	279095904	306268161	Name="backfat at last rib"	Abbrev=LRIBF
1	chr1	296787813	296854248	13	280547030	306268161	Name="Trimmed wholesale product / live weight"	Abbrev=TWPLWT
1	chr1	296787813	296854248	23	280547030	303972175	Name="Backfat at tenth rib"	Abbrev=10RIBBFT
1	chr1	296787813	296854248	169	290462910	301130831	Name="body weight (13 weeks)"	Abbrev=Wt
1	chr1	296787813	296854248	401	292695065	307576631	Name="Backfat weight"	Abbrev=BFW
1	chr1	296787813	296854248	376	293329173	311724687	Name="Ham weight"	Abbrev=HAMWT	P-value=<0.0
1	chr1	296787813	296854248	375	294756973	311724687	Name="Loin weight"	Abbrev=LOINWT	P-value=<0.001
1	chr1	296787813	296854248	402	294756973	311724687	Name="Leaf fat weight"	Abbrev=LFW	P-value=<0.05
1	chr1	311929352	312829468	403	306172623	315321322	Name="Percentage of backfat and leaf fat in carcass"	Abbrev=BLFATP	P-value=<0.05
1	chr1	313111618	313480723	403	306172623	315321322	Name="Percentage of backfat and leaf fat in carcass"	Abbrev=BLFATP	P-value=<0.05
2	Chr.2	13853695	14043003	5432	609757	157789611	Name="Carcass weight (hot)"	Abbrev=HCWT
2	Chr.2	13853695	14043003	5437	609757	157789611	Name="Ham weight"	Abbrev=HAMWT
2	Chr.2	13853695	14043003	5438	609757	157789611	Name="Shoulder weight"	Abbrev=SHOUWT
2	Chr.2	13853695	14043003	5440	609757	157789611	Name="Shear firmness"	Abbrev=SHFRM
2	Chr.2	13853695	14043003	5496	609757	157789611	Name="Cutlet weight"	Abbrev=CUTL
2	Chr.2	13853695	14043003	15090	609757	101614625	Name="Creatine kinase level"	Abbrev=CK
2	Chr.2	13853695	14043003	197	609757	15823608	Name="backfat (13 weeks of age)"	Abbrev=BF13w
2	Chr.2	13853695	14043003	198	609757	15946890	Name="backfat (40 kg live weight)"	Abbrev=BF40k
2	Chr.2	13853695	14043003	199	609757	15823608	Name="backfat (60 kg live weight)"	Abbrev=BF60k
2	Chr.2	13853695	14043003	406	609757	21763657	Name="Backfat thickness between 3rd and 4th rib"	Abbrev=34RIBBFT
2	Chr.2	13853695	14043003	407	609757	19340056	Name="backfat at last rib"	Abbrev=LRIBF
2	Chr.2	13853695	14043003	3942	609757	48775112	Name="Backfat between 6th and 7th ribs"	Abbrev=67RIBBF	P-value=0.37
2	Chr.2	13853695	14043003	618	609757	15441523	Name="Average backfat thickness"	Abbrev=BFT	P-value=<0.05
2	Chr.2	13853695	14043003	619	609757	15441523	Name="Ham percentage"	Abbrev=HAMP	P-value=<0.05
2	Chr.2	13853695	14043003	620	609757	15441523	Name="Loin percentage"	Abbrev=LOINP	P-value=<0.05
2	Chr.2	13853695	14043003	621	609757	15441523	Name="Lean meat percentage"	Abbrev=LEANP	P-value=<0.05
2	Chr.2	13853695	14043003	622	609757	15441523	Name="Backfat percentage"	Abbrev=BFP	P-value=<0.05
2	Chr.2	13853695	14043003	623	609757	15441523	Name="Fat-cuts percentage"	Abbrev=FATCP	P-value=<0.05
2	Chr.2	13853695	14043003	3890	609757	27552141	Name="Feed intake (35-80 kg)"	Abbrev=feedin
2	Chr.2	13853695	14043003	3941	609757	48775112	Name="Backfat at first rib"	Abbrev=1RIBBFT	P-value=0.45
2	Chr.2	13853695	14043003	17602	609757	21136167	Name="Interleukin-10 level"	Abbrev=IL10	P-value=<0.05
2	Chr.2	13853695	14043003	9591	609757	18209772	Name="Hemolytic complement activity (alternative pathway)"	Abbrev=AH50	P-value=<0.05
2	Chr.2	13853695	14043003	9592	609757	18209772	Name="Hemolytic complement activity (alternative pathway)"	Abbrev=AH50	P-value=<0.05
2	Chr.2	13853695	14043003	5688	609757	133375944	Name="Loin muscle area"	Abbrev=LMA	P-value=<0.05
2	Chr.2	13853695	14043003	9612	609757	162569375	Name="C3c concentration	Abbrev=C3C;	P-value=<0.01
2	Chr.2	13853695	14043003	17618	609757	21136167	Name="Toll-like receptor 9 level"	Abbrev=TLR9	P-value=<0.05
2	Chr.2	13853695	14043003	9613	609757	162569375	Name="C3c concentration"	Abbrev=C3C	P-value=<0.05
2	Chr.2	13853695	14043003	9593	609757	18209772	Name="Hemolytic complement activity (alternative pathway)"	Abbrev=AH50	P-value=<0.05
2	Chr.2	13853695	14043003	9614	609757	162569375	Name="C3c concentration"	Abbrev=C3C	P-value=<0.05
2	Chr.2	13853695	14043003	364	609757	43738502	Name="Average backfat thickness"	Abbrev=BFT
2	Chr.2	13853695	14043003	16875	609757	85009446	Name="backfat at last rib"	Abbrev=LRIBF	P-value=<0.05
2	Chr.2	13853695	14043003	3839	609757	25252518	Name="muscle protein percentage"	Abbrev=MPROT	P-value=<0.05
2	Chr.2	13853695	14043003	5689	609757	154953107	Name="Fat to meat ratio"	Abbrev=FMR	P-value=<0.05
2	Chr.2	13853695	14043003	7576	2387169	133160620	Name="Melanoma susceptibility"	Abbrev=MELAN	P-value=<0.05
2	Chr.2	13853695	14043003	914	2387169	21136167	Name="Ham weight"	Abbrev=HAMWT
2	Chr.2	13853695	14043003	929	2387169	21136167	Name="average daily gain"	Abbrev=ADG
2	Chr.2	13853695	14043003	5690	2387169	154953107	Name="Belly meat content"	Abbrev=BYLEAN	P-value=<0.05
2	Chr.2	13853695	14043003	5691	2387169	154953107	Name="Estimated carcass lean content"	Abbrev=ECLC	P-value=<0.05
2	Chr.2	13853695	14043003	5965	2387169	38367026	Name="Average backfat thickness"	Abbrev=BFT	P-value=<0.05
2	Chr.2	13853695	14043003	21217	2948442	15950969	Name="Backfat at rump"	Abbrev=BFTR	P-value=<0.01
2	Chr.2	13853695	14043003	21214	2948442	138050552	Name="Abdominal fat weight"	Abbrev=ABDF	P-value=<0.01
2	Chr.2	13853695	14043003	21212	2948442	137276970	Name="Average backfat thickness"	Abbrev=BFT	P-value=<0.05
2	Chr.2	13853695	14043003	21216	2948442	44995408	Name="Backfat at first rib"	Abbrev=1RIBBFT	P-value=<0.01
2	Chr.2	13853695	14043003	21213	4798534	131599097	Name="Abdominal fat weight"	Abbrev=ABDF	P-value=<0.01
2	Chr.2	13853695	14043003	5242	5101784	150528181	Name="backfat at mid-back"	Abbrev=BFM	P-value=<0.05
2	Chr.2	13853695	14043003	5134	6636615	17962639	Name="Ham weight"	Abbrev=HAMWT	P-value=<0.05
2	Chr.2	13853695	14043003	5218	6662614	140912872	Name="Shoulder subcutaneous fat thickness"	Abbrev=SHOUFATD	P-value=<0.05
2	Chr.2	13853695	14043003	86	7440323	38367026	Name="Drip loss"	Abbrev=DRIPL
2	Chr.2	13853695	14043003	5208	7804743	150596593	Name="backfat at mid-back"	Abbrev=BFM	P-value=<0.05
2	Chr.2	13853695	14043003	5199	9758855	150135089	Name="Body weight (end of test)"	Abbrev=BW	P-value=<0.05
2	Chr.2	13853695	14043003	5394	10846385	21136167	Name="Hemoglobin"	Abbrev=HGB	P-value=<0.05
2	Chr.2	13853695	14043003	5411	10846385	21136167	Name="Red blood cell count"	Abbrev=RBC	P-value=<0.05
2	Chr.2	13853695	14043003	5422	10846385	21136167	Name="hematocrit"	Abbrev=HCT	P-value=<0.05
2	Chr.2	13853695	14043003	6354	10846385	21136167	Name="Alkaline phosphatase activity"	Abbrev=ALPA	P-value=<0.05
2	Chr.2	13853695	14043003	5760	10846385	18333408	Name="tenderness score"	Abbrev=TEND	P-value=<0.01
2	Chr.2	13853695	14043003	21313	10846385	21136167	Name="Mycoplasmal pneumonia susceptibility"	Abbrev=MPS	P-value=<0.05
2	Chr.2	13853695	14043003	17550	11055674	26478024	Name="Average backfat thickness"	Abbrev=BFT	P-value=<0.01
2	Chr.2	13853695	14043003	17552	11327829	19559392	Name="CIE-a*"	Abbrev=CIEa	P-value=<0.05
2	Chr.2	13853695	14043003	17551	11360950	27277479	Name="Lean meat percentage"	Abbrev=LEANP	P-value=<0.01
2	Chr.2	13853695	14043003	21303	12184677	154346072	Name="Lumbar vertebra number"	Abbrev=LVNUM	P-value=<0.05
2	Chr.2	13853695	14043003	17558	12858082	26561459	Name="Lean meat percentage"	Abbrev=LEANP	P-value=<0.01
2	Chr.2	13853695	14043003	3889	12897996	24656701	Name="Daily feed intake"	Abbrev=FEEDIN
2	Chr.2	13853695	14043003	917	13366532	21136167	Name="Heart weight"	Abbrev=HWT
2	Chr.2	13853695	14043003	2937	13366532	34221548	Name="Drip loss"	Abbrev=DRIPL	P-value=0.030
2	Chr.2	13853695	14043003	925	13366532	21136167	Name="Backfat at tenth rib"	Abbrev=10RIBBFT
2	Chr.2	13853695	14043003	12313	13366532	21136167	Name="Platelet distribution width"	Abbrev=PLDWID	P-value=7.06E-05
2	Chr.2	13853695	14043003	12314	13366532	21136167	Name="Plateletcrit"	Abbrev=PCT
2	Chr.2	13853695	14043003	926	13366532	21136167	Name="Shoulder subcutaneous fat thickness"	Abbrev=SHOUFATD
2	Chr.2	13853695	14043003	902	13366532	44483418	Name="pH 24 hr post-mortem (loin)"	Abbrev=pH
2	Chr.2	13853695	14043003	909	13366532	44483418	Name="Teat number"	Abbrev=TNUM
2	Chr.2	13853695	14043003	2938	13366532	34221548	Name="Off-Flavor Score"	Abbrev=OFFFLAV	P-value=0.016
2	Chr.2	13853695	14043003	3780	13366532	100385940	Name="Drip loss"	Abbrev=DRIPL	P-value=<0.05
2	Chr.2	13853695	14043003	21848	13366532	46840491	Name="Drip loss"	Abbrev=DRIPL	P-value=<0.05
2	Chr.2	13853695	14043003	5685	13366532	154953107	Name="backfat at last rib"	Abbrev=LRIBF	P-value=<0.05
2	Chr.2	13853695	14043003	3810	13366532	100385940	Name="Off-Flavor Score"	Abbrev=OFFFLAV	P-value=<0.01
2	Chr.2	13853695	14043003	3809	13366532	100385940	Name="Firmness"	Abbrev=FIRM	P-value=<0.05
2	Chr.2	13853695	14043003	17998	13366532	75040316	Name="Average backfat thickness"	Abbrev=BFT
2	Chr.2	13853695	14043003	15066	13366532	131656956	Name="Cholesterol level"	Abbrev=CHOLS
2	Chr.2	15202906	15501488	5432	609757	157789611	Name="Carcass weight (hot)"	Abbrev=HCWT
2	Chr.2	15202906	15501488	5437	609757	157789611	Name="Ham weight"	Abbrev=HAMWT
2	Chr.2	15202906	15501488	5438	609757	157789611	Name="Shoulder weight"	Abbrev=SHOUWT
2	Chr.2	15202906	15501488	5440	609757	157789611	Name="Shear firmness"	Abbrev=SHFRM
2	Chr.2	15202906	15501488	5496	609757	157789611	Name="Cutlet weight"	Abbrev=CUTL
2	Chr.2	15202906	15501488	15090	609757	101614625	Name="Creatine kinase level"	Abbrev=CK
2	Chr.2	15202906	15501488	197	609757	15823608	Name="backfat (13 weeks of age)"	Abbrev=BF13w
2	Chr.2	15202906	15501488	198	609757	15946890	Name="backfat (40 kg live weight)"	Abbrev=BF40k
2	Chr.2	15202906	15501488	199	609757	15823608	Name="backfat (60 kg live weight)"	Abbrev=BF60k
2	Chr.2	15202906	15501488	406	609757	21763657	Name="Backfat thickness between 3rd and 4th rib"	Abbrev=34RIBBFT
2	Chr.2	15202906	15501488	407	609757	19340056	Name="backfat at last rib"	Abbrev=LRIBF
2	Chr.2	15202906	15501488	3942	609757	48775112	Name="Backfat between 6th and 7th ribs"	Abbrev=67RIBBF	P-value=0.37
2	Chr.2	15202906	15501488	618	609757	15441523	Name="Average backfat thickness"	Abbrev=BFT	P-value=<0.05
2	Chr.2	15202906	15501488	619	609757	15441523	Name="Ham percentage"	Abbrev=HAMP	P-value=<0.05
2	Chr.2	15202906	15501488	620	609757	15441523	Name="Loin percentage"	Abbrev=LOINP	P-value=<0.05
2	Chr.2	15202906	15501488	621	609757	15441523	Name="Lean meat percentage"	Abbrev=LEANP	P-value=<0.05
2	Chr.2	15202906	15501488	622	609757	15441523	Name="Backfat percentage"	Abbrev=BFP	P-value=<0.05
2	Chr.2	15202906	15501488	623	609757	15441523	Name="Fat-cuts percentage"	Abbrev=FATCP	P-value=<0.05
2	Chr.2	15202906	15501488	3890	609757	27552141	Name="Feed intake (35-80 kg)"	Abbrev=feedin
2	Chr.2	15202906	15501488	3941	609757	48775112	Name="Backfat at first rib"	Abbrev=1RIBBFT	P-value=0.45
2	Chr.2	15202906	15501488	17602	609757	21136167	Name="Interleukin-10 level"	Abbrev=IL10	P-value=<0.05
2	Chr.2	15202906	15501488	9591	609757	18209772	Name="Hemolytic complement activity (alternative pathway)"	Abbrev=AH50	P-value=<0.05
2	Chr.2	15202906	15501488	9592	609757	18209772	Name="Hemolytic complement activity (alternative pathway)"	Abbrev=AH50	P-value=<0.05
2	Chr.2	15202906	15501488	5688	609757	133375944	Name="Loin muscle area"	Abbrev=LMA	P-value=<0.05
2	Chr.2	15202906	15501488	9612	609757	162569375	Name="C3c concentration	Abbrev=C3C;	P-value=<0.01
2	Chr.2	15202906	15501488	17618	609757	21136167	Name="Toll-like receptor 9 level"	Abbrev=TLR9	P-value=<0.05
2	Chr.2	15202906	15501488	9613	609757	162569375	Name="C3c concentration"	Abbrev=C3C	P-value=<0.05
2	Chr.2	15202906	15501488	9593	609757	18209772	Name="Hemolytic complement activity (alternative pathway)"	Abbrev=AH50	P-value=<0.05
2	Chr.2	15202906	15501488	9614	609757	162569375	Name="C3c concentration"	Abbrev=C3C	P-value=<0.05
2	Chr.2	15202906	15501488	364	609757	43738502	Name="Average backfat thickness"	Abbrev=BFT
2	Chr.2	15202906	15501488	16875	609757	85009446	Name="backfat at last rib"	Abbrev=LRIBF	P-value=<0.05
2	Chr.2	15202906	15501488	3839	609757	25252518	Name="muscle protein percentage"	Abbrev=MPROT	P-value=<0.05
2	Chr.2	15202906	15501488	5689	609757	154953107	Name="Fat to meat ratio"	Abbrev=FMR	P-value=<0.05
2	Chr.2	15202906	15501488	7576	2387169	133160620	Name="Melanoma susceptibility"	Abbrev=MELAN	P-value=<0.05
2	Chr.2	15202906	15501488	914	2387169	21136167	Name="Ham weight"	Abbrev=HAMWT
2	Chr.2	15202906	15501488	929	2387169	21136167	Name="average daily gain"	Abbrev=ADG
2	Chr.2	15202906	15501488	5690	2387169	154953107	Name="Belly meat content"	Abbrev=BYLEAN	P-value=<0.05
2	Chr.2	15202906	15501488	5691	2387169	154953107	Name="Estimated carcass lean content"	Abbrev=ECLC	P-value=<0.05
2	Chr.2	15202906	15501488	5965	2387169	38367026	Name="Average backfat thickness"	Abbrev=BFT	P-value=<0.05
2	Chr.2	15202906	15501488	21217	2948442	15950969	Name="Backfat at rump"	Abbrev=BFTR	P-value=<0.01
2	Chr.2	15202906	15501488	21214	2948442	138050552	Name="Abdominal fat weight"	Abbrev=ABDF	P-value=<0.01
2	Chr.2	15202906	15501488	21212	2948442	137276970	Name="Average backfat thickness"	Abbrev=BFT	P-value=<0.05
2	Chr.2	15202906	15501488	21216	2948442	44995408	Name="Backfat at first rib"	Abbrev=1RIBBFT	P-value=<0.01
2	Chr.2	15202906	15501488	21213	4798534	131599097	Name="Abdominal fat weight"	Abbrev=ABDF	P-value=<0.01
2	Chr.2	15202906	15501488	5242	5101784	150528181	Name="backfat at mid-back"	Abbrev=BFM	P-value=<0.05
2	Chr.2	15202906	15501488	5134	6636615	17962639	Name="Ham weight"	Abbrev=HAMWT	P-value=<0.05
2	Chr.2	15202906	15501488	5218	6662614	140912872	Name="Shoulder subcutaneous fat thickness"	Abbrev=SHOUFATD	P-value=<0.05
2	Chr.2	15202906	15501488	86	7440323	38367026	Name="Drip loss"	Abbrev=DRIPL
2	Chr.2	15202906	15501488	5208	7804743	150596593	Name="backfat at mid-back"	Abbrev=BFM	P-value=<0.05
2	Chr.2	15202906	15501488	5199	9758855	150135089	Name="Body weight (end of test)"	Abbrev=BW	P-value=<0.05
2	Chr.2	15202906	15501488	5394	10846385	21136167	Name="Hemoglobin"	Abbrev=HGB	P-value=<0.05
2	Chr.2	15202906	15501488	5411	10846385	21136167	Name="Red blood cell count"	Abbrev=RBC	P-value=<0.05
2	Chr.2	15202906	15501488	5422	10846385	21136167	Name="hematocrit"	Abbrev=HCT	P-value=<0.05
2	Chr.2	15202906	15501488	6354	10846385	21136167	Name="Alkaline phosphatase activity"	Abbrev=ALPA	P-value=<0.05
2	Chr.2	15202906	15501488	5760	10846385	18333408	Name="tenderness score"	Abbrev=TEND	P-value=<0.01
2	Chr.2	15202906	15501488	21313	10846385	21136167	Name="Mycoplasmal pneumonia susceptibility"	Abbrev=MPS	P-value=<0.05
2	Chr.2	15202906	15501488	17550	11055674	26478024	Name="Average backfat thickness"	Abbrev=BFT	P-value=<0.01
2	Chr.2	15202906	15501488	17552	11327829	19559392	Name="CIE-a*"	Abbrev=CIEa	P-value=<0.05
2	Chr.2	15202906	15501488	17551	11360950	27277479	Name="Lean meat percentage"	Abbrev=LEANP	P-value=<0.01
2	Chr.2	15202906	15501488	21303	12184677	154346072	Name="Lumbar vertebra number"	Abbrev=LVNUM	P-value=<0.05
2	Chr.2	15202906	15501488	17558	12858082	26561459	Name="Lean meat percentage"	Abbrev=LEANP	P-value=<0.01
2	Chr.2	15202906	15501488	3889	12897996	24656701	Name="Daily feed intake"	Abbrev=FEEDIN
2	Chr.2	15202906	15501488	917	13366532	21136167	Name="Heart weight"	Abbrev=HWT
2	Chr.2	15202906	15501488	2937	13366532	34221548	Name="Drip loss"	Abbrev=DRIPL	P-value=0.030
2	Chr.2	15202906	15501488	925	13366532	21136167	Name="Backfat at tenth rib"	Abbrev=10RIBBFT
2	Chr.2	15202906	15501488	12313	13366532	21136167	Name="Platelet distribution width"	Abbrev=PLDWID	P-value=7.06E-05
2	Chr.2	15202906	15501488	12314	13366532	21136167	Name="Plateletcrit"	Abbrev=PCT
2	Chr.2	15202906	15501488	926	13366532	21136167	Name="Shoulder subcutaneous fat thickness"	Abbrev=SHOUFATD
2	Chr.2	15202906	15501488	902	13366532	44483418	Name="pH 24 hr post-mortem (loin)"	Abbrev=pH
2	Chr.2	15202906	15501488	909	13366532	44483418	Name="Teat number"	Abbrev=TNUM
2	Chr.2	15202906	15501488	2938	13366532	34221548	Name="Off-Flavor Score"	Abbrev=OFFFLAV	P-value=0.016
2	Chr.2	15202906	15501488	3780	13366532	100385940	Name="Drip loss"	Abbrev=DRIPL	P-value=<0.05
2	Chr.2	15202906	15501488	21848	13366532	46840491	Name="Drip loss"	Abbrev=DRIPL	P-value=<0.05
2	Chr.2	15202906	15501488	5685	13366532	154953107	Name="backfat at last rib"	Abbrev=LRIBF	P-value=<0.05
2	Chr.2	15202906	15501488	3810	13366532	100385940	Name="Off-Flavor Score"	Abbrev=OFFFLAV	P-value=<0.01
2	Chr.2	15202906	15501488	3809	13366532	100385940	Name="Firmness"	Abbrev=FIRM	P-value=<0.05
2	Chr.2	15202906	15501488	17998	13366532	75040316	Name="Average backfat thickness"	Abbrev=BFT
2	Chr.2	15202906	15501488	15066	13366532	131656956	Name="Cholesterol level"	Abbrev=CHOLS
2	Chr.2	15202906	15501488	7596	15441523	50079118	Name="Melanoma susceptibility"	Abbrev=MELAN	P-value=<0.05
2	Chr.2	15202906	15501488	3058	15441523	21136167	Name="Drip loss"	Abbrev=DRIPL	P-value=0.0513
2	Chr.2	21834717	21891536	5432	609757	157789611	Name="Carcass weight (hot)"	Abbrev=HCWT
2	Chr.2	21834717	21891536	5437	609757	157789611	Name="Ham weight"	Abbrev=HAMWT
2	Chr.2	21834717	21891536	5438	609757	157789611	Name="Shoulder weight"	Abbrev=SHOUWT
2	Chr.2	21834717	21891536	5440	609757	157789611	Name="Shear firmness"	Abbrev=SHFRM
2	Chr.2	21834717	21891536	5496	609757	157789611	Name="Cutlet weight"	Abbrev=CUTL
2	Chr.2	21834717	21891536	15090	609757	101614625	Name="Creatine kinase level"	Abbrev=CK
2	Chr.2	21834717	21891536	3942	609757	48775112	Name="Backfat between 6th and 7th ribs"	Abbrev=67RIBBF	P-value=0.37
2	Chr.2	21834717	21891536	3890	609757	27552141	Name="Feed intake (35-80 kg)"	Abbrev=feedin
2	Chr.2	21834717	21891536	3941	609757	48775112	Name="Backfat at first rib"	Abbrev=1RIBBFT	P-value=0.45
2	Chr.2	21834717	21891536	5688	609757	133375944	Name="Loin muscle area"	Abbrev=LMA	P-value=<0.05
2	Chr.2	21834717	21891536	9612	609757	162569375	Name="C3c concentration	Abbrev=C3C;	P-value=<0.01
2	Chr.2	21834717	21891536	9613	609757	162569375	Name="C3c concentration"	Abbrev=C3C	P-value=<0.05
2	Chr.2	21834717	21891536	9614	609757	162569375	Name="C3c concentration"	Abbrev=C3C	P-value=<0.05
2	Chr.2	21834717	21891536	364	609757	43738502	Name="Average backfat thickness"	Abbrev=BFT
2	Chr.2	21834717	21891536	16875	609757	85009446	Name="backfat at last rib"	Abbrev=LRIBF	P-value=<0.05
2	Chr.2	21834717	21891536	3839	609757	25252518	Name="muscle protein percentage"	Abbrev=MPROT	P-value=<0.05
2	Chr.2	21834717	21891536	5689	609757	154953107	Name="Fat to meat ratio"	Abbrev=FMR	P-value=<0.05
2	Chr.2	21834717	21891536	7576	2387169	133160620	Name="Melanoma susceptibility"	Abbrev=MELAN	P-value=<0.05
2	Chr.2	21834717	21891536	5690	2387169	154953107	Name="Belly meat content"	Abbrev=BYLEAN	P-value=<0.05
2	Chr.2	21834717	21891536	5691	2387169	154953107	Name="Estimated carcass lean content"	Abbrev=ECLC	P-value=<0.05
2	Chr.2	21834717	21891536	5965	2387169	38367026	Name="Average backfat thickness"	Abbrev=BFT	P-value=<0.05
2	Chr.2	21834717	21891536	21214	2948442	138050552	Name="Abdominal fat weight"	Abbrev=ABDF	P-value=<0.01
2	Chr.2	21834717	21891536	21212	2948442	137276970	Name="Average backfat thickness"	Abbrev=BFT	P-value=<0.05
2	Chr.2	21834717	21891536	21216	2948442	44995408	Name="Backfat at first rib"	Abbrev=1RIBBFT	P-value=<0.01
2	Chr.2	21834717	21891536	21213	4798534	131599097	Name="Abdominal fat weight"	Abbrev=ABDF	P-value=<0.01
2	Chr.2	21834717	21891536	5242	5101784	150528181	Name="backfat at mid-back"	Abbrev=BFM	P-value=<0.05
2	Chr.2	21834717	21891536	5218	6662614	140912872	Name="Shoulder subcutaneous fat thickness"	Abbrev=SHOUFATD	P-value=<0.05
2	Chr.2	21834717	21891536	86	7440323	38367026	Name="Drip loss"	Abbrev=DRIPL
2	Chr.2	21834717	21891536	5208	7804743	150596593	Name="backfat at mid-back"	Abbrev=BFM	P-value=<0.05
2	Chr.2	21834717	21891536	5199	9758855	150135089	Name="Body weight (end of test)"	Abbrev=BW	P-value=<0.05
2	Chr.2	21834717	21891536	17550	11055674	26478024	Name="Average backfat thickness"	Abbrev=BFT	P-value=<0.01
2	Chr.2	21834717	21891536	17551	11360950	27277479	Name="Lean meat percentage"	Abbrev=LEANP	P-value=<0.01
2	Chr.2	21834717	21891536	21303	12184677	154346072	Name="Lumbar vertebra number"	Abbrev=LVNUM	P-value=<0.05
2	Chr.2	21834717	21891536	17558	12858082	26561459	Name="Lean meat percentage"	Abbrev=LEANP	P-value=<0.01
2	Chr.2	21834717	21891536	3889	12897996	24656701	Name="Daily feed intake"	Abbrev=FEEDIN
2	Chr.2	21834717	21891536	2937	13366532	34221548	Name="Drip loss"	Abbrev=DRIPL	P-value=0.030
2	Chr.2	21834717	21891536	902	13366532	44483418	Name="pH 24 hr post-mortem (loin)"	Abbrev=pH
2	Chr.2	21834717	21891536	909	13366532	44483418	Name="Teat number"	Abbrev=TNUM
2	Chr.2	21834717	21891536	2938	13366532	34221548	Name="Off-Flavor Score"	Abbrev=OFFFLAV	P-value=0.016
2	Chr.2	21834717	21891536	3780	13366532	100385940	Name="Drip loss"	Abbrev=DRIPL	P-value=<0.05
2	Chr.2	21834717	21891536	21848	13366532	46840491	Name="Drip loss"	Abbrev=DRIPL	P-value=<0.05
2	Chr.2	21834717	21891536	5685	13366532	154953107	Name="backfat at last rib"	Abbrev=LRIBF	P-value=<0.05
2	Chr.2	21834717	21891536	3810	13366532	100385940	Name="Off-Flavor Score"	Abbrev=OFFFLAV	P-value=<0.01
2	Chr.2	21834717	21891536	3809	13366532	100385940	Name="Firmness"	Abbrev=FIRM	P-value=<0.05
2	Chr.2	21834717	21891536	17998	13366532	75040316	Name="Average backfat thickness"	Abbrev=BFT
2	Chr.2	21834717	21891536	15066	13366532	131656956	Name="Cholesterol level"	Abbrev=CHOLS
2	Chr.2	21834717	21891536	7596	15441523	50079118	Name="Melanoma susceptibility"	Abbrev=MELAN	P-value=<0.05
2	Chr.2	21834717	21891536	15887	15902392	34221548	Name="Stearic acid content"	Abbrev=FA-C18:0
2	Chr.2	21834717	21891536	21219	18576632	122130129	Name="Shoulder subcutaneous fat thickness"	Abbrev=SHOUFATD	P-value=<0.01
2	Chr.2	21834717	21891536	12318	19343556	150827358	Name="Tetanus antibody titer"	Abbrev=TETAB	P-value=<0.01
2	Chr.2	21834717	21891536	17715	21136167	38367026	Name="HDL cholesterol"	Abbrev=HDL	P-value=<0.05
2	Chr.2	21834717	21891536	29690	21136167	139359663	Name="Carcass length"	Abbrev=CRCL	P-value=<0.05
2	Chr.2	21834717	21891536	307	21136167	59648728	Name="Average backfat thickness"	Abbrev=BFT	P-value=0.0022
2	Chr.2	21834717	21891536	5686	21136167	38367026	Name="Side fat thickness"	Abbrev=BFS	P-value=<0.05
2	Chr.2	21834717	21891536	927	21136167	44483418	Name="Lean meat percentage"	Abbrev=LEANP
2	Chr.2	21834717	21891536	12747	21136167	119359590	Name="Fat-cuts percentage"	Abbrev=FATCP	P-value=<0.05
2	Chr.2	21834717	21891536	901	21136167	44483418	Name="Fat-cuts percentage"	Abbrev=FATCP
2	Chr.2	21834717	21891536	905	21136167	44483418	Name="Dressing percentage"	Abbrev=DRESS%
2	Chr.2	21834717	21891536	899	21136167	44483418	Name="Dressing percentage"	Abbrev=DRESS%
2	Chr.2	21834717	21891536	903	21136167	44483418	Name="Loin muscle area"	Abbrev=LMA
2	Chr.2	21834717	21891536	12748	21136167	119359590	Name="Fat to meat ratio"	Abbrev=FMR	P-value=<0.05
2	Chr.2	21834717	21891536	897	21136167	44483418	Name="Lean meat percentage"	Abbrev=LEANP
2	Chr.2	21834717	21891536	21852	21136167	44483418	Name="Stiffness"	Abbrev=STIFF	P-value=<0.05
2	Chr.2	21834717	21891536	900	21136167	44483418	Name="Fat-cuts percentage"	Abbrev=FATCP
2	Chr.2	21834717	21891536	275	21136167	35687241	Name="Vertebra number"	Abbrev=VNUM	P-value=< 0.01
2	Chr.2	21834717	21891536	16888	21136167	119359590	Name="average daily gain"	Abbrev=ADG	P-value=<0.05
2	Chr.2	21834717	21891536	1253	21136167	44483418	Name="Fat-cuts percentage"	Abbrev=FATCP
2	Chr.2	21834717	21891536	16898	21136167	75040316	Name="Carcass weight (hot)"	Abbrev=HCWT	P-value=<0.05
2	Chr.2	21834717	21891536	809	21136167	44483418	Name="Lean cuts percentage"	Abbrev=LEANCUTP
2	Chr.2	21834717	21891536	21324	21136167	53611728	Name="White blood cell counts"	Abbrev=WBC	P-value=<0.05
2	Chr.2	21834717	21891536	4025	21136167	75040316	Name="Percentage type IIa fibers"	Abbrev=FIB2AP	P-value=<0.01
2	Chr.2	21834717	21891536	17610	21136167	59648728	Name="Interferon-gamma level"	Abbrev=IFNG	P-value=<0.05
2	Chr.2	21834717	21891536	4205	21136167	122791407	Name="androstenone, laboratory"	Abbrev=ANDR	P-value=<0.05
2	Chr.2	21834717	21891536	21331	21136167	53611728	Name="White blood cell counts"	Abbrev=WBC
2	Chr.2	21834717	21891536	16883	21136167	75040316	Name="backfat at last rib"	Abbrev=LRIBF	P-value=<0.05
2	Chr.2	21834717	21891536	8680	21796209	21942181	QName="Sperm per ejaculate"	Abbrev=SPPEJ
2	Chr.2	24340490	24536667	5432	609757	157789611	Name="Carcass weight (hot)"	Abbrev=HCWT
2	Chr.2	24340490	24536667	5437	609757	157789611	Name="Ham weight"	Abbrev=HAMWT
2	Chr.2	24340490	24536667	5438	609757	157789611	Name="Shoulder weight"	Abbrev=SHOUWT
2	Chr.2	24340490	24536667	5440	609757	157789611	Name="Shear firmness"	Abbrev=SHFRM
2	Chr.2	24340490	24536667	5496	609757	157789611	Name="Cutlet weight"	Abbrev=CUTL
2	Chr.2	24340490	24536667	15090	609757	101614625	Name="Creatine kinase level"	Abbrev=CK
2	Chr.2	24340490	24536667	3942	609757	48775112	Name="Backfat between 6th and 7th ribs"	Abbrev=67RIBBF	P-value=0.37
2	Chr.2	24340490	24536667	3890	609757	27552141	Name="Feed intake (35-80 kg)"	Abbrev=feedin
2	Chr.2	24340490	24536667	3941	609757	48775112	Name="Backfat at first rib"	Abbrev=1RIBBFT	P-value=0.45
2	Chr.2	24340490	24536667	5688	609757	133375944	Name="Loin muscle area"	Abbrev=LMA	P-value=<0.05
2	Chr.2	24340490	24536667	9612	609757	162569375	Name="C3c concentration	Abbrev=C3C;	P-value=<0.01
2	Chr.2	24340490	24536667	9613	609757	162569375	Name="C3c concentration"	Abbrev=C3C	P-value=<0.05
2	Chr.2	24340490	24536667	9614	609757	162569375	Name="C3c concentration"	Abbrev=C3C	P-value=<0.05
2	Chr.2	24340490	24536667	364	609757	43738502	Name="Average backfat thickness"	Abbrev=BFT
2	Chr.2	24340490	24536667	16875	609757	85009446	Name="backfat at last rib"	Abbrev=LRIBF	P-value=<0.05
2	Chr.2	24340490	24536667	3839	609757	25252518	Name="muscle protein percentage"	Abbrev=MPROT	P-value=<0.05
2	Chr.2	24340490	24536667	5689	609757	154953107	Name="Fat to meat ratio"	Abbrev=FMR	P-value=<0.05
2	Chr.2	24340490	24536667	7576	2387169	133160620	Name="Melanoma susceptibility"	Abbrev=MELAN	P-value=<0.05
2	Chr.2	24340490	24536667	5690	2387169	154953107	Name="Belly meat content"	Abbrev=BYLEAN	P-value=<0.05
2	Chr.2	24340490	24536667	5691	2387169	154953107	Name="Estimated carcass lean content"	Abbrev=ECLC	P-value=<0.05
2	Chr.2	24340490	24536667	5965	2387169	38367026	Name="Average backfat thickness"	Abbrev=BFT	P-value=<0.05
2	Chr.2	24340490	24536667	21214	2948442	138050552	Name="Abdominal fat weight"	Abbrev=ABDF	P-value=<0.01
2	Chr.2	24340490	24536667	21212	2948442	137276970	Name="Average backfat thickness"	Abbrev=BFT	P-value=<0.05
2	Chr.2	24340490	24536667	21216	2948442	44995408	Name="Backfat at first rib"	Abbrev=1RIBBFT	P-value=<0.01
2	Chr.2	24340490	24536667	21213	4798534	131599097	Name="Abdominal fat weight"	Abbrev=ABDF	P-value=<0.01
2	Chr.2	24340490	24536667	5242	5101784	150528181	Name="backfat at mid-back"	Abbrev=BFM	P-value=<0.05
2	Chr.2	24340490	24536667	5218	6662614	140912872	Name="Shoulder subcutaneous fat thickness"	Abbrev=SHOUFATD	P-value=<0.05
2	Chr.2	24340490	24536667	86	7440323	38367026	Name="Drip loss"	Abbrev=DRIPL
2	Chr.2	24340490	24536667	5208	7804743	150596593	Name="backfat at mid-back"	Abbrev=BFM	P-value=<0.05
2	Chr.2	24340490	24536667	5199	9758855	150135089	Name="Body weight (end of test)"	Abbrev=BW	P-value=<0.05
2	Chr.2	24340490	24536667	17550	11055674	26478024	Name="Average backfat thickness"	Abbrev=BFT	P-value=<0.01
2	Chr.2	24340490	24536667	17551	11360950	27277479	Name="Lean meat percentage"	Abbrev=LEANP	P-value=<0.01
2	Chr.2	24340490	24536667	21303	12184677	154346072	Name="Lumbar vertebra number"	Abbrev=LVNUM	P-value=<0.05
2	Chr.2	24340490	24536667	17558	12858082	26561459	Name="Lean meat percentage"	Abbrev=LEANP	P-value=<0.01
2	Chr.2	24340490	24536667	3889	12897996	24656701	Name="Daily feed intake"	Abbrev=FEEDIN
2	Chr.2	24340490	24536667	2937	13366532	34221548	Name="Drip loss"	Abbrev=DRIPL	P-value=0.030
2	Chr.2	24340490	24536667	902	13366532	44483418	Name="pH 24 hr post-mortem (loin)"	Abbrev=pH
2	Chr.2	24340490	24536667	909	13366532	44483418	Name="Teat number"	Abbrev=TNUM
2	Chr.2	24340490	24536667	2938	13366532	34221548	Name="Off-Flavor Score"	Abbrev=OFFFLAV	P-value=0.016
2	Chr.2	24340490	24536667	3780	13366532	100385940	Name="Drip loss"	Abbrev=DRIPL	P-value=<0.05
2	Chr.2	24340490	24536667	21848	13366532	46840491	Name="Drip loss"	Abbrev=DRIPL	P-value=<0.05
2	Chr.2	24340490	24536667	5685	13366532	154953107	Name="backfat at last rib"	Abbrev=LRIBF	P-value=<0.05
2	Chr.2	24340490	24536667	3810	13366532	100385940	Name="Off-Flavor Score"	Abbrev=OFFFLAV	P-value=<0.01
2	Chr.2	24340490	24536667	3809	13366532	100385940	Name="Firmness"	Abbrev=FIRM	P-value=<0.05
2	Chr.2	24340490	24536667	17998	13366532	75040316	Name="Average backfat thickness"	Abbrev=BFT
2	Chr.2	24340490	24536667	15066	13366532	131656956	Name="Cholesterol level"	Abbrev=CHOLS
2	Chr.2	24340490	24536667	7596	15441523	50079118	Name="Melanoma susceptibility"	Abbrev=MELAN	P-value=<0.05
2	Chr.2	24340490	24536667	15887	15902392	34221548	Name="Stearic acid content"	Abbrev=FA-C18:0
2	Chr.2	24340490	24536667	21219	18576632	122130129	Name="Shoulder subcutaneous fat thickness"	Abbrev=SHOUFATD	P-value=<0.01
2	Chr.2	24340490	24536667	12318	19343556	150827358	Name="Tetanus antibody titer"	Abbrev=TETAB	P-value=<0.01
2	Chr.2	24340490	24536667	17715	21136167	38367026	Name="HDL cholesterol"	Abbrev=HDL	P-value=<0.05
2	Chr.2	24340490	24536667	29690	21136167	139359663	Name="Carcass length"	Abbrev=CRCL	P-value=<0.05
2	Chr.2	24340490	24536667	307	21136167	59648728	Name="Average backfat thickness"	Abbrev=BFT	P-value=0.0022
2	Chr.2	24340490	24536667	5686	21136167	38367026	Name="Side fat thickness"	Abbrev=BFS	P-value=<0.05
2	Chr.2	24340490	24536667	927	21136167	44483418	Name="Lean meat percentage"	Abbrev=LEANP
2	Chr.2	24340490	24536667	12747	21136167	119359590	Name="Fat-cuts percentage"	Abbrev=FATCP	P-value=<0.05
2	Chr.2	24340490	24536667	901	21136167	44483418	Name="Fat-cuts percentage"	Abbrev=FATCP
2	Chr.2	24340490	24536667	905	21136167	44483418	Name="Dressing percentage"	Abbrev=DRESS%
2	Chr.2	24340490	24536667	899	21136167	44483418	Name="Dressing percentage"	Abbrev=DRESS%
2	Chr.2	24340490	24536667	903	21136167	44483418	Name="Loin muscle area"	Abbrev=LMA
2	Chr.2	24340490	24536667	12748	21136167	119359590	Name="Fat to meat ratio"	Abbrev=FMR	P-value=<0.05
2	Chr.2	24340490	24536667	897	21136167	44483418	Name="Lean meat percentage"	Abbrev=LEANP
2	Chr.2	24340490	24536667	21852	21136167	44483418	Name="Stiffness"	Abbrev=STIFF	P-value=<0.05
2	Chr.2	24340490	24536667	900	21136167	44483418	Name="Fat-cuts percentage"	Abbrev=FATCP
2	Chr.2	24340490	24536667	275	21136167	35687241	Name="Vertebra number"	Abbrev=VNUM	P-value=< 0.01
2	Chr.2	24340490	24536667	16888	21136167	119359590	Name="average daily gain"	Abbrev=ADG	P-value=<0.05
2	Chr.2	24340490	24536667	1253	21136167	44483418	Name="Fat-cuts percentage"	Abbrev=FATCP
2	Chr.2	24340490	24536667	16898	21136167	75040316	Name="Carcass weight (hot)"	Abbrev=HCWT	P-value=<0.05
2	Chr.2	24340490	24536667	809	21136167	44483418	Name="Lean cuts percentage"	Abbrev=LEANCUTP
2	Chr.2	24340490	24536667	21324	21136167	53611728	Name="White blood cell counts"	Abbrev=WBC	P-value=<0.05
2	Chr.2	24340490	24536667	4025	21136167	75040316	Name="Percentage type IIa fibers"	Abbrev=FIB2AP	P-value=<0.01
2	Chr.2	24340490	24536667	17610	21136167	59648728	Name="Interferon-gamma level"	Abbrev=IFNG	P-value=<0.05
2	Chr.2	24340490	24536667	4205	21136167	122791407	Name="androstenone, laboratory"	Abbrev=ANDR	P-value=<0.05
2	Chr.2	24340490	24536667	21331	21136167	53611728	Name="White blood cell counts"	Abbrev=WBC
2	Chr.2	24340490	24536667	16883	21136167	75040316	Name="backfat at last rib"	Abbrev=LRIBF	P-value=<0.05
2	Chr.2	24340490	24536667	32704	22319097	26786805	Name="Ham meat percentage"	Abbrev=MPHAM	P-value=<0.05
2	Chr.2	24340490	24536667	32705	22319097	26786805	Name="Ham meat percentage"	Abbrev=MPHAM	P-value=<0.05
2	Chr.2	24340490	24536667	32706	22319097	26786805	Name="Ham meat percentage"	Abbrev=MPHAM	P-value=<0.05
2	Chr.2	24340490	24536667	32707	22319097	26786805	Name="Ham meat percentage"	Abbrev=MPHAM	P-value=<0.05
2	Chr.2	24340490	24536667	32708	22319097	26786805	Name="Ham meat percentage"	Abbrev=MPHAM	P-value=<0.05
2	Chr.2	24340490	24536667	32709	22319097	26786805	Name="Ham meat percentage"	Abbrev=MPHAM	P-value=<0.05
2	Chr.2	24340490	24536667	32710	22319097	26786805	Name="Ham meat percentage"	Abbrev=MPHAM	P-value=<0.05
2	Chr.2	24340490	24536667	32711	22319097	26786805	Name="Ham meat percentage"	Abbrev=MPHAM	P-value=<0.05
2	Chr.2	24340490	24536667	32712	22319097	26786805	Name="Ham meat percentage"	Abbrev=MPHAM	P-value=<0.05
2	Chr.2	24340490	24536667	32713	22319097	26786805	QName="Ham meat percentage"	Abbrev=MPHAM	P-value=<0.05
2	Chr.2	24340490	24536667	32714	22319097	26786805	Name="Ham meat percentage"	Abbrev=MPHAM	P-value=<0.05
2	Chr.2	24340490	24536667	32715	22319097	26786805	Name="Ham meat percentage"	Abbrev=MPHAM	P-value=<0.05
2	Chr.2	24340490	24536667	32716	22319097	26786805	Name="Ham meat percentage"	Abbrev=MPHAM	P-value=<0.05
2	Chr.2	24340490	24536667	32717	22319097	26786805	Name="Ham meat percentage"	Abbrev=MPHAM	P-value=<0.05
2	Chr.2	24340490	24536667	32718	22319097	26786805	Name="Lean meat percentage"	Abbrev=LEANP	P-value=<0.05
2	Chr.2	24340490	24536667	32719	22319097	26786805	Name="Lean meat percentage"	Abbrev=LEANP	P-value=<0.05
2	Chr.2	24340490	24536667	32720	22319097	26786805	Name="Lean meat percentage"	Abbrev=LEANP	P-value=<0.05
2	Chr.2	24340490	24536667	32721	22319097	26786805	Name="Lean meat percentage"	Abbrev=LEANP	P-value=<0.05
2	Chr.2	24340490	24536667	32722	22319097	26786805	Name="Lean meat percentage"	Abbrev=LEANP	P-value=<0.05
2	Chr.2	24340490	24536667	32723	22319097	26786805	Name="Lean meat percentage"	Abbrev=LEANP	P-value=<0.05
2	Chr.2	24340490	24536667	32724	22319097	26786805	Name="Lean meat percentage"	Abbrev=LEANP	P-value=<0.05
2	Chr.2	24340490	24536667	32725	22319097	26786805	Name="Lean meat percentage"	Abbrev=LEANP	P-value=<0.05
2	Chr.2	24340490	24536667	32726	22319097	26786805	Name="Lean meat percentage"	Abbrev=LEANP	P-value=<0.05
2	Chr.2	24340490	24536667	32727	22319097	26786805	Name="Lean meat percentage"	Abbrev=LEANP	P-value=<0.05
2	Chr.2	24340490	24536667	32728	22319097	26786805	Name="Lean meat percentage"	Abbrev=LEANP	P-value=<0.05
2	Chr.2	24340490	24536667	32745	22319097	26786805	Name="Age at puberty"	Abbrev=AGEP	P-value=0.0260
2	Chr.2	24340490	24536667	32759	22319097	26786805	Name="CIE-L*"	Abbrev=CIEL	P-value=4.581E-5
2	Chr.2	24340490	24536667	28083	24391349	29002222	Name="Average backfat thickness"	Abbrev=BFT	P-value=<0.05
2	Chr.2	24340490	24536667	28082	24391349	29002222	Name="Average backfat thickness"	Abbrev=BFT	P-value=<0.05
2	Chr.2	24340490	24536667	28087	24391349	29002222	Name="Average backfat thickness"	Abbrev=BFT	P-value=<0.05
2	Chr.2	24340490	24536667	28086	24391349	29002222	Name="Average backfat thickness"	Abbrev=BFT	P-value=<0.05
2	Chr.2	24340490	24536667	28085	24391349	29002222	Name="Average backfat thickness"	Abbrev=BFT	P-value=<0.05
2	Chr.2	24340490	24536667	28084	24391349	29002222	Name="Average backfat thickness"	Abbrev=BFT	P-value=<0.05
2	Chr.2	24340490	24536667	5755	24397760	24656701	Name="Marbling"	Abbrev=MARB	P-value=<0.05
2	Chr.2	25815932	25926589	5432	609757	157789611	Name="Carcass weight (hot)"	Abbrev=HCWT
2	Chr.2	25815932	25926589	5437	609757	157789611	Name="Ham weight"	Abbrev=HAMWT
2	Chr.2	25815932	25926589	5438	609757	157789611	Name="Shoulder weight"	Abbrev=SHOUWT
2	Chr.2	25815932	25926589	5440	609757	157789611	Name="Shear firmness"	Abbrev=SHFRM
2	Chr.2	25815932	25926589	5496	609757	157789611	Name="Cutlet weight"	Abbrev=CUTL
2	Chr.2	25815932	25926589	15090	609757	101614625	Name="Creatine kinase level"	Abbrev=CK
2	Chr.2	25815932	25926589	3942	609757	48775112	Name="Backfat between 6th and 7th ribs"	Abbrev=67RIBBF	P-value=0.37
2	Chr.2	25815932	25926589	3890	609757	27552141	Name="Feed intake (35-80 kg)"	Abbrev=feedin
2	Chr.2	25815932	25926589	3941	609757	48775112	Name="Backfat at first rib"	Abbrev=1RIBBFT	P-value=0.45
2	Chr.2	25815932	25926589	5688	609757	133375944	Name="Loin muscle area"	Abbrev=LMA	P-value=<0.05
2	Chr.2	25815932	25926589	9612	609757	162569375	Name="C3c concentration	Abbrev=C3C;	P-value=<0.01
2	Chr.2	25815932	25926589	9613	609757	162569375	Name="C3c concentration"	Abbrev=C3C	P-value=<0.05
2	Chr.2	25815932	25926589	9614	609757	162569375	Name="C3c concentration"	Abbrev=C3C	P-value=<0.05
2	Chr.2	25815932	25926589	364	609757	43738502	Name="Average backfat thickness"	Abbrev=BFT
2	Chr.2	25815932	25926589	16875	609757	85009446	Name="backfat at last rib"	Abbrev=LRIBF	P-value=<0.05
2	Chr.2	25815932	25926589	5689	609757	154953107	Name="Fat to meat ratio"	Abbrev=FMR	P-value=<0.05
2	Chr.2	25815932	25926589	7576	2387169	133160620	Name="Melanoma susceptibility"	Abbrev=MELAN	P-value=<0.05
2	Chr.2	25815932	25926589	5690	2387169	154953107	Name="Belly meat content"	Abbrev=BYLEAN	P-value=<0.05
2	Chr.2	25815932	25926589	5691	2387169	154953107	Name="Estimated carcass lean content"	Abbrev=ECLC	P-value=<0.05
2	Chr.2	25815932	25926589	5965	2387169	38367026	Name="Average backfat thickness"	Abbrev=BFT	P-value=<0.05
2	Chr.2	25815932	25926589	21214	2948442	138050552	Name="Abdominal fat weight"	Abbrev=ABDF	P-value=<0.01
2	Chr.2	25815932	25926589	21212	2948442	137276970	Name="Average backfat thickness"	Abbrev=BFT	P-value=<0.05
2	Chr.2	25815932	25926589	21216	2948442	44995408	Name="Backfat at first rib"	Abbrev=1RIBBFT	P-value=<0.01
2	Chr.2	25815932	25926589	21213	4798534	131599097	Name="Abdominal fat weight"	Abbrev=ABDF	P-value=<0.01
2	Chr.2	25815932	25926589	5242	5101784	150528181	Name="backfat at mid-back"	Abbrev=BFM	P-value=<0.05
2	Chr.2	25815932	25926589	5218	6662614	140912872	Name="Shoulder subcutaneous fat thickness"	Abbrev=SHOUFATD	P-value=<0.05
2	Chr.2	25815932	25926589	86	7440323	38367026	Name="Drip loss"	Abbrev=DRIPL
2	Chr.2	25815932	25926589	5208	7804743	150596593	Name="backfat at mid-back"	Abbrev=BFM	P-value=<0.05
2	Chr.2	25815932	25926589	5199	9758855	150135089	Name="Body weight (end of test)"	Abbrev=BW	P-value=<0.05
2	Chr.2	25815932	25926589	17550	11055674	26478024	Name="Average backfat thickness"	Abbrev=BFT	P-value=<0.01
2	Chr.2	25815932	25926589	17551	11360950	27277479	Name="Lean meat percentage"	Abbrev=LEANP	P-value=<0.01
2	Chr.2	25815932	25926589	21303	12184677	154346072	Name="Lumbar vertebra number"	Abbrev=LVNUM	P-value=<0.05
2	Chr.2	25815932	25926589	17558	12858082	26561459	Name="Lean meat percentage"	Abbrev=LEANP	P-value=<0.01
2	Chr.2	25815932	25926589	2937	13366532	34221548	Name="Drip loss"	Abbrev=DRIPL	P-value=0.030
2	Chr.2	25815932	25926589	902	13366532	44483418	Name="pH 24 hr post-mortem (loin)"	Abbrev=pH
2	Chr.2	25815932	25926589	909	13366532	44483418	Name="Teat number"	Abbrev=TNUM
2	Chr.2	25815932	25926589	2938	13366532	34221548	Name="Off-Flavor Score"	Abbrev=OFFFLAV	P-value=0.016
2	Chr.2	25815932	25926589	3780	13366532	100385940	Name="Drip loss"	Abbrev=DRIPL	P-value=<0.05
2	Chr.2	25815932	25926589	21848	13366532	46840491	Name="Drip loss"	Abbrev=DRIPL	P-value=<0.05
2	Chr.2	25815932	25926589	5685	13366532	154953107	Name="backfat at last rib"	Abbrev=LRIBF	P-value=<0.05
2	Chr.2	25815932	25926589	3810	13366532	100385940	Name="Off-Flavor Score"	Abbrev=OFFFLAV	P-value=<0.01
2	Chr.2	25815932	25926589	3809	13366532	100385940	Name="Firmness"	Abbrev=FIRM	P-value=<0.05
2	Chr.2	25815932	25926589	17998	13366532	75040316	Name="Average backfat thickness"	Abbrev=BFT
2	Chr.2	25815932	25926589	15066	13366532	131656956	Name="Cholesterol level"	Abbrev=CHOLS
2	Chr.2	25815932	25926589	7596	15441523	50079118	Name="Melanoma susceptibility"	Abbrev=MELAN	P-value=<0.05
2	Chr.2	25815932	25926589	15887	15902392	34221548	Name="Stearic acid content"	Abbrev=FA-C18:0
2	Chr.2	25815932	25926589	21219	18576632	122130129	Name="Shoulder subcutaneous fat thickness"	Abbrev=SHOUFATD	P-value=<0.01
2	Chr.2	25815932	25926589	12318	19343556	150827358	Name="Tetanus antibody titer"	Abbrev=TETAB	P-value=<0.01
2	Chr.2	25815932	25926589	17715	21136167	38367026	Name="HDL cholesterol"	Abbrev=HDL	P-value=<0.05
2	Chr.2	25815932	25926589	29690	21136167	139359663	Name="Carcass length"	Abbrev=CRCL	P-value=<0.05
2	Chr.2	25815932	25926589	307	21136167	59648728	Name="Average backfat thickness"	Abbrev=BFT	P-value=0.0022
2	Chr.2	25815932	25926589	5686	21136167	38367026	Name="Side fat thickness"	Abbrev=BFS	P-value=<0.05
2	Chr.2	25815932	25926589	927	21136167	44483418	Name="Lean meat percentage"	Abbrev=LEANP
2	Chr.2	25815932	25926589	12747	21136167	119359590	Name="Fat-cuts percentage"	Abbrev=FATCP	P-value=<0.05
2	Chr.2	25815932	25926589	901	21136167	44483418	Name="Fat-cuts percentage"	Abbrev=FATCP
2	Chr.2	25815932	25926589	905	21136167	44483418	Name="Dressing percentage"	Abbrev=DRESS%
2	Chr.2	25815932	25926589	899	21136167	44483418	Name="Dressing percentage"	Abbrev=DRESS%
2	Chr.2	25815932	25926589	903	21136167	44483418	Name="Loin muscle area"	Abbrev=LMA
2	Chr.2	25815932	25926589	12748	21136167	119359590	Name="Fat to meat ratio"	Abbrev=FMR	P-value=<0.05
2	Chr.2	25815932	25926589	897	21136167	44483418	Name="Lean meat percentage"	Abbrev=LEANP
2	Chr.2	25815932	25926589	21852	21136167	44483418	Name="Stiffness"	Abbrev=STIFF	P-value=<0.05
2	Chr.2	25815932	25926589	900	21136167	44483418	Name="Fat-cuts percentage"	Abbrev=FATCP
2	Chr.2	25815932	25926589	275	21136167	35687241	Name="Vertebra number"	Abbrev=VNUM	P-value=< 0.01
2	Chr.2	25815932	25926589	16888	21136167	119359590	Name="average daily gain"	Abbrev=ADG	P-value=<0.05
2	Chr.2	25815932	25926589	1253	21136167	44483418	Name="Fat-cuts percentage"	Abbrev=FATCP
2	Chr.2	25815932	25926589	16898	21136167	75040316	Name="Carcass weight (hot)"	Abbrev=HCWT	P-value=<0.05
2	Chr.2	25815932	25926589	809	21136167	44483418	Name="Lean cuts percentage"	Abbrev=LEANCUTP
2	Chr.2	25815932	25926589	21324	21136167	53611728	Name="White blood cell counts"	Abbrev=WBC	P-value=<0.05
2	Chr.2	25815932	25926589	4025	21136167	75040316	Name="Percentage type IIa fibers"	Abbrev=FIB2AP	P-value=<0.01
2	Chr.2	25815932	25926589	17610	21136167	59648728	Name="Interferon-gamma level"	Abbrev=IFNG	P-value=<0.05
2	Chr.2	25815932	25926589	4205	21136167	122791407	Name="androstenone, laboratory"	Abbrev=ANDR	P-value=<0.05
2	Chr.2	25815932	25926589	21331	21136167	53611728	Name="White blood cell counts"	Abbrev=WBC
2	Chr.2	25815932	25926589	16883	21136167	75040316	Name="backfat at last rib"	Abbrev=LRIBF	P-value=<0.05
2	Chr.2	25815932	25926589	32704	22319097	26786805	Name="Ham meat percentage"	Abbrev=MPHAM	P-value=<0.05
2	Chr.2	25815932	25926589	32705	22319097	26786805	Name="Ham meat percentage"	Abbrev=MPHAM	P-value=<0.05
2	Chr.2	25815932	25926589	32706	22319097	26786805	Name="Ham meat percentage"	Abbrev=MPHAM	P-value=<0.05
2	Chr.2	25815932	25926589	32707	22319097	26786805	Name="Ham meat percentage"	Abbrev=MPHAM	P-value=<0.05
2	Chr.2	25815932	25926589	32708	22319097	26786805	Name="Ham meat percentage"	Abbrev=MPHAM	P-value=<0.05
2	Chr.2	25815932	25926589	32709	22319097	26786805	Name="Ham meat percentage"	Abbrev=MPHAM	P-value=<0.05
2	Chr.2	25815932	25926589	32710	22319097	26786805	Name="Ham meat percentage"	Abbrev=MPHAM	P-value=<0.05
2	Chr.2	25815932	25926589	32711	22319097	26786805	Name="Ham meat percentage"	Abbrev=MPHAM	P-value=<0.05
2	Chr.2	25815932	25926589	32712	22319097	26786805	Name="Ham meat percentage"	Abbrev=MPHAM	P-value=<0.05
2	Chr.2	25815932	25926589	32713	22319097	26786805	QName="Ham meat percentage"	Abbrev=MPHAM	P-value=<0.05
2	Chr.2	25815932	25926589	32714	22319097	26786805	Name="Ham meat percentage"	Abbrev=MPHAM	P-value=<0.05
2	Chr.2	25815932	25926589	32715	22319097	26786805	Name="Ham meat percentage"	Abbrev=MPHAM	P-value=<0.05
2	Chr.2	25815932	25926589	32716	22319097	26786805	Name="Ham meat percentage"	Abbrev=MPHAM	P-value=<0.05
2	Chr.2	25815932	25926589	32717	22319097	26786805	Name="Ham meat percentage"	Abbrev=MPHAM	P-value=<0.05
2	Chr.2	25815932	25926589	32718	22319097	26786805	Name="Lean meat percentage"	Abbrev=LEANP	P-value=<0.05
2	Chr.2	25815932	25926589	32719	22319097	26786805	Name="Lean meat percentage"	Abbrev=LEANP	P-value=<0.05
2	Chr.2	25815932	25926589	32720	22319097	26786805	Name="Lean meat percentage"	Abbrev=LEANP	P-value=<0.05
2	Chr.2	25815932	25926589	32721	22319097	26786805	Name="Lean meat percentage"	Abbrev=LEANP	P-value=<0.05
2	Chr.2	25815932	25926589	32722	22319097	26786805	Name="Lean meat percentage"	Abbrev=LEANP	P-value=<0.05
2	Chr.2	25815932	25926589	32723	22319097	26786805	Name="Lean meat percentage"	Abbrev=LEANP	P-value=<0.05
2	Chr.2	25815932	25926589	32724	22319097	26786805	Name="Lean meat percentage"	Abbrev=LEANP	P-value=<0.05
2	Chr.2	25815932	25926589	32725	22319097	26786805	Name="Lean meat percentage"	Abbrev=LEANP	P-value=<0.05
2	Chr.2	25815932	25926589	32726	22319097	26786805	Name="Lean meat percentage"	Abbrev=LEANP	P-value=<0.05
2	Chr.2	25815932	25926589	32727	22319097	26786805	Name="Lean meat percentage"	Abbrev=LEANP	P-value=<0.05
2	Chr.2	25815932	25926589	32728	22319097	26786805	Name="Lean meat percentage"	Abbrev=LEANP	P-value=<0.05
2	Chr.2	25815932	25926589	32745	22319097	26786805	Name="Age at puberty"	Abbrev=AGEP	P-value=0.0260
2	Chr.2	25815932	25926589	32759	22319097	26786805	Name="CIE-L*"	Abbrev=CIEL	P-value=4.581E-5
2	Chr.2	25815932	25926589	28083	24391349	29002222	Name="Average backfat thickness"	Abbrev=BFT	P-value=<0.05
2	Chr.2	25815932	25926589	28082	24391349	29002222	Name="Average backfat thickness"	Abbrev=BFT	P-value=<0.05
2	Chr.2	25815932	25926589	28087	24391349	29002222	Name="Average backfat thickness"	Abbrev=BFT	P-value=<0.05
2	Chr.2	25815932	25926589	28086	24391349	29002222	Name="Average backfat thickness"	Abbrev=BFT	P-value=<0.05
2	Chr.2	25815932	25926589	28085	24391349	29002222	Name="Average backfat thickness"	Abbrev=BFT	P-value=<0.05
2	Chr.2	25815932	25926589	28084	24391349	29002222	Name="Average backfat thickness"	Abbrev=BFT	P-value=<0.05
2	Chr.2	25815932	25926589	5755	24397760	24656701	Name="Marbling"	Abbrev=MARB	P-value=<0.05
2	Chr.2	25815932	25926589	3867	24795034	42280622	Name="Leaf fat weight"	Abbrev=LFW	P-value=<0.05
2	Chr.2	25815932	25926589	3851	25252518	41353385	Name="Muscle moisture percentage"	Abbrev=MMP	P-value=<0.05
2	Chr.2	25815932	25926589	3940	25252518	48775112	Name="Semimembranosus angle"	Abbrev=SMANGL	P-value=0.22
2	Chr.2	25815932	25926589	9580	25252518	64352885	Name="Linoleic acid content"	Abbrev=FA-C18:2	P-value=0.000022
2	Chr.2	36580946	36661408	5432	609757	157789611	Name="Carcass weight (hot)"	Abbrev=HCWT
2	Chr.2	36580946	36661408	5437	609757	157789611	Name="Ham weight"	Abbrev=HAMWT
2	Chr.2	36580946	36661408	5438	609757	157789611	Name="Shoulder weight"	Abbrev=SHOUWT
2	Chr.2	36580946	36661408	5440	609757	157789611	Name="Shear firmness"	Abbrev=SHFRM
2	Chr.2	36580946	36661408	5496	609757	157789611	Name="Cutlet weight"	Abbrev=CUTL
2	Chr.2	36580946	36661408	15090	609757	101614625	Name="Creatine kinase level"	Abbrev=CK
2	Chr.2	36580946	36661408	3942	609757	48775112	Name="Backfat between 6th and 7th ribs"	Abbrev=67RIBBF	P-value=0.37
2	Chr.2	36580946	36661408	3941	609757	48775112	Name="Backfat at first rib"	Abbrev=1RIBBFT	P-value=0.45
2	Chr.2	36580946	36661408	5688	609757	133375944	Name="Loin muscle area"	Abbrev=LMA	P-value=<0.05
2	Chr.2	36580946	36661408	9612	609757	162569375	Name="C3c concentration	Abbrev=C3C;	P-value=<0.01
2	Chr.2	36580946	36661408	9613	609757	162569375	Name="C3c concentration"	Abbrev=C3C	P-value=<0.05
2	Chr.2	36580946	36661408	9614	609757	162569375	Name="C3c concentration"	Abbrev=C3C	P-value=<0.05
2	Chr.2	36580946	36661408	364	609757	43738502	Name="Average backfat thickness"	Abbrev=BFT
2	Chr.2	36580946	36661408	16875	609757	85009446	Name="backfat at last rib"	Abbrev=LRIBF	P-value=<0.05
2	Chr.2	36580946	36661408	5689	609757	154953107	Name="Fat to meat ratio"	Abbrev=FMR	P-value=<0.05
2	Chr.2	36580946	36661408	7576	2387169	133160620	Name="Melanoma susceptibility"	Abbrev=MELAN	P-value=<0.05
2	Chr.2	36580946	36661408	5690	2387169	154953107	Name="Belly meat content"	Abbrev=BYLEAN	P-value=<0.05
2	Chr.2	36580946	36661408	5691	2387169	154953107	Name="Estimated carcass lean content"	Abbrev=ECLC	P-value=<0.05
2	Chr.2	36580946	36661408	5965	2387169	38367026	Name="Average backfat thickness"	Abbrev=BFT	P-value=<0.05
2	Chr.2	36580946	36661408	21214	2948442	138050552	Name="Abdominal fat weight"	Abbrev=ABDF	P-value=<0.01
2	Chr.2	36580946	36661408	21212	2948442	137276970	Name="Average backfat thickness"	Abbrev=BFT	P-value=<0.05
2	Chr.2	36580946	36661408	21216	2948442	44995408	Name="Backfat at first rib"	Abbrev=1RIBBFT	P-value=<0.01
2	Chr.2	36580946	36661408	21213	4798534	131599097	Name="Abdominal fat weight"	Abbrev=ABDF	P-value=<0.01
2	Chr.2	36580946	36661408	5242	5101784	150528181	Name="backfat at mid-back"	Abbrev=BFM	P-value=<0.05
2	Chr.2	36580946	36661408	5218	6662614	140912872	Name="Shoulder subcutaneous fat thickness"	Abbrev=SHOUFATD	P-value=<0.05
2	Chr.2	36580946	36661408	86	7440323	38367026	Name="Drip loss"	Abbrev=DRIPL
2	Chr.2	36580946	36661408	5208	7804743	150596593	Name="backfat at mid-back"	Abbrev=BFM	P-value=<0.05
2	Chr.2	36580946	36661408	5199	9758855	150135089	Name="Body weight (end of test)"	Abbrev=BW	P-value=<0.05
2	Chr.2	36580946	36661408	21303	12184677	154346072	Name="Lumbar vertebra number"	Abbrev=LVNUM	P-value=<0.05
2	Chr.2	36580946	36661408	902	13366532	44483418	Name="pH 24 hr post-mortem (loin)"	Abbrev=pH
2	Chr.2	36580946	36661408	909	13366532	44483418	Name="Teat number"	Abbrev=TNUM
2	Chr.2	36580946	36661408	3780	13366532	100385940	Name="Drip loss"	Abbrev=DRIPL	P-value=<0.05
2	Chr.2	36580946	36661408	21848	13366532	46840491	Name="Drip loss"	Abbrev=DRIPL	P-value=<0.05
2	Chr.2	36580946	36661408	5685	13366532	154953107	Name="backfat at last rib"	Abbrev=LRIBF	P-value=<0.05
2	Chr.2	36580946	36661408	3810	13366532	100385940	Name="Off-Flavor Score"	Abbrev=OFFFLAV	P-value=<0.01
2	Chr.2	36580946	36661408	3809	13366532	100385940	Name="Firmness"	Abbrev=FIRM	P-value=<0.05
2	Chr.2	36580946	36661408	17998	13366532	75040316	Name="Average backfat thickness"	Abbrev=BFT
2	Chr.2	36580946	36661408	15066	13366532	131656956	Name="Cholesterol level"	Abbrev=CHOLS
2	Chr.2	36580946	36661408	7596	15441523	50079118	Name="Melanoma susceptibility"	Abbrev=MELAN	P-value=<0.05
2	Chr.2	36580946	36661408	21219	18576632	122130129	Name="Shoulder subcutaneous fat thickness"	Abbrev=SHOUFATD	P-value=<0.01
2	Chr.2	36580946	36661408	12318	19343556	150827358	Name="Tetanus antibody titer"	Abbrev=TETAB	P-value=<0.01
2	Chr.2	36580946	36661408	17715	21136167	38367026	Name="HDL cholesterol"	Abbrev=HDL	P-value=<0.05
2	Chr.2	36580946	36661408	29690	21136167	139359663	Name="Carcass length"	Abbrev=CRCL	P-value=<0.05
2	Chr.2	36580946	36661408	307	21136167	59648728	Name="Average backfat thickness"	Abbrev=BFT	P-value=0.0022
2	Chr.2	36580946	36661408	5686	21136167	38367026	Name="Side fat thickness"	Abbrev=BFS	P-value=<0.05
2	Chr.2	36580946	36661408	927	21136167	44483418	Name="Lean meat percentage"	Abbrev=LEANP
2	Chr.2	36580946	36661408	12747	21136167	119359590	Name="Fat-cuts percentage"	Abbrev=FATCP	P-value=<0.05
2	Chr.2	36580946	36661408	901	21136167	44483418	Name="Fat-cuts percentage"	Abbrev=FATCP
2	Chr.2	36580946	36661408	905	21136167	44483418	Name="Dressing percentage"	Abbrev=DRESS%
2	Chr.2	36580946	36661408	899	21136167	44483418	Name="Dressing percentage"	Abbrev=DRESS%
2	Chr.2	36580946	36661408	903	21136167	44483418	Name="Loin muscle area"	Abbrev=LMA
2	Chr.2	36580946	36661408	12748	21136167	119359590	Name="Fat to meat ratio"	Abbrev=FMR	P-value=<0.05
2	Chr.2	36580946	36661408	897	21136167	44483418	Name="Lean meat percentage"	Abbrev=LEANP
2	Chr.2	36580946	36661408	21852	21136167	44483418	Name="Stiffness"	Abbrev=STIFF	P-value=<0.05
2	Chr.2	36580946	36661408	900	21136167	44483418	Name="Fat-cuts percentage"	Abbrev=FATCP
2	Chr.2	36580946	36661408	16888	21136167	119359590	Name="average daily gain"	Abbrev=ADG	P-value=<0.05
2	Chr.2	36580946	36661408	1253	21136167	44483418	Name="Fat-cuts percentage"	Abbrev=FATCP
2	Chr.2	36580946	36661408	16898	21136167	75040316	Name="Carcass weight (hot)"	Abbrev=HCWT	P-value=<0.05
2	Chr.2	36580946	36661408	809	21136167	44483418	Name="Lean cuts percentage"	Abbrev=LEANCUTP
2	Chr.2	36580946	36661408	21324	21136167	53611728	Name="White blood cell counts"	Abbrev=WBC	P-value=<0.05
2	Chr.2	36580946	36661408	4025	21136167	75040316	Name="Percentage type IIa fibers"	Abbrev=FIB2AP	P-value=<0.01
2	Chr.2	36580946	36661408	17610	21136167	59648728	Name="Interferon-gamma level"	Abbrev=IFNG	P-value=<0.05
2	Chr.2	36580946	36661408	4205	21136167	122791407	Name="androstenone, laboratory"	Abbrev=ANDR	P-value=<0.05
2	Chr.2	36580946	36661408	21331	21136167	53611728	Name="White blood cell counts"	Abbrev=WBC
2	Chr.2	36580946	36661408	16883	21136167	75040316	Name="backfat at last rib"	Abbrev=LRIBF	P-value=<0.05
2	Chr.2	36580946	36661408	3867	24795034	42280622	Name="Leaf fat weight"	Abbrev=LFW	P-value=<0.05
2	Chr.2	36580946	36661408	3851	25252518	41353385	Name="Muscle moisture percentage"	Abbrev=MMP	P-value=<0.05
2	Chr.2	36580946	36661408	3940	25252518	48775112	Name="Semimembranosus angle"	Abbrev=SMANGL	P-value=0.22
2	Chr.2	36580946	36661408	9580	25252518	64352885	Name="Linoleic acid content"	Abbrev=FA-C18:2	P-value=0.000022
2	Chr.2	36580946	36661408	3868	28764390	42280622	Name="Loin muscle area"	Abbrev=LMA	P-value=<0.05
2	Chr.2	36580946	36661408	3107	29530258	53611728	Name="Fat to meat ratio"	Abbrev=FMR	P-value=<0.05
2	Chr.2	36580946	36661408	669	33031443	123480352	Name="Loin muscle depth"	Abbrev=LMDEP
2	Chr.2	36580946	36661408	15857	34221548	75082926	Name="Linoleic acid content"	Abbrev=FA-C18:2
2	Chr.2	36580946	36661408	15856	34221548	75082926	Name="Stearic acid content"	Abbrev=FA-C18:0
2	Chr.2	36580946	36661408	3778	34221548	100385940	Name="Body weight (16 days)"	Abbrev=16DWT	P-value=<0.05
2	Chr.2	36580946	36661408	3779	34221548	133160620	Name="Average daily gain (on weaning)"	Abbrev=ADG	P-value=<0.05
2	Chr.2	36580946	36661408	12665	35687241	65816994	Name="Drip loss"	Abbrev=DRIPL	P-value=<0.05
2	Chr.2	36580946	36661408	3224	35687241	48775112	Name="Juiciness score"	Abbrev=JUICE
2	Chr.2	36580946	36661408	21354	35687241	48775112	Name="Juiciness score"	Abbrev=JUICE	P-value=0.001
2	Chr.2	38279249	38614109	5432	609757	157789611	Name="Carcass weight (hot)"	Abbrev=HCWT
2	Chr.2	38279249	38614109	5437	609757	157789611	Name="Ham weight"	Abbrev=HAMWT
2	Chr.2	38279249	38614109	5438	609757	157789611	Name="Shoulder weight"	Abbrev=SHOUWT
2	Chr.2	38279249	38614109	5440	609757	157789611	Name="Shear firmness"	Abbrev=SHFRM
2	Chr.2	38279249	38614109	5496	609757	157789611	Name="Cutlet weight"	Abbrev=CUTL
2	Chr.2	38279249	38614109	15090	609757	101614625	Name="Creatine kinase level"	Abbrev=CK
2	Chr.2	38279249	38614109	3942	609757	48775112	Name="Backfat between 6th and 7th ribs"	Abbrev=67RIBBF	P-value=0.37
2	Chr.2	38279249	38614109	3941	609757	48775112	Name="Backfat at first rib"	Abbrev=1RIBBFT	P-value=0.45
2	Chr.2	38279249	38614109	5688	609757	133375944	Name="Loin muscle area"	Abbrev=LMA	P-value=<0.05
2	Chr.2	38279249	38614109	9612	609757	162569375	Name="C3c concentration	Abbrev=C3C;	P-value=<0.01
2	Chr.2	38279249	38614109	9613	609757	162569375	Name="C3c concentration"	Abbrev=C3C	P-value=<0.05
2	Chr.2	38279249	38614109	9614	609757	162569375	Name="C3c concentration"	Abbrev=C3C	P-value=<0.05
2	Chr.2	38279249	38614109	364	609757	43738502	Name="Average backfat thickness"	Abbrev=BFT
2	Chr.2	38279249	38614109	16875	609757	85009446	Name="backfat at last rib"	Abbrev=LRIBF	P-value=<0.05
2	Chr.2	38279249	38614109	5689	609757	154953107	Name="Fat to meat ratio"	Abbrev=FMR	P-value=<0.05
2	Chr.2	38279249	38614109	7576	2387169	133160620	Name="Melanoma susceptibility"	Abbrev=MELAN	P-value=<0.05
2	Chr.2	38279249	38614109	5690	2387169	154953107	Name="Belly meat content"	Abbrev=BYLEAN	P-value=<0.05
2	Chr.2	38279249	38614109	5691	2387169	154953107	Name="Estimated carcass lean content"	Abbrev=ECLC	P-value=<0.05
2	Chr.2	38279249	38614109	5965	2387169	38367026	Name="Average backfat thickness"	Abbrev=BFT	P-value=<0.05
2	Chr.2	38279249	38614109	21214	2948442	138050552	Name="Abdominal fat weight"	Abbrev=ABDF	P-value=<0.01
2	Chr.2	38279249	38614109	21212	2948442	137276970	Name="Average backfat thickness"	Abbrev=BFT	P-value=<0.05
2	Chr.2	38279249	38614109	21216	2948442	44995408	Name="Backfat at first rib"	Abbrev=1RIBBFT	P-value=<0.01
2	Chr.2	38279249	38614109	21213	4798534	131599097	Name="Abdominal fat weight"	Abbrev=ABDF	P-value=<0.01
2	Chr.2	38279249	38614109	5242	5101784	150528181	Name="backfat at mid-back"	Abbrev=BFM	P-value=<0.05
2	Chr.2	38279249	38614109	5218	6662614	140912872	Name="Shoulder subcutaneous fat thickness"	Abbrev=SHOUFATD	P-value=<0.05
2	Chr.2	38279249	38614109	86	7440323	38367026	Name="Drip loss"	Abbrev=DRIPL
2	Chr.2	38279249	38614109	5208	7804743	150596593	Name="backfat at mid-back"	Abbrev=BFM	P-value=<0.05
2	Chr.2	38279249	38614109	5199	9758855	150135089	Name="Body weight (end of test)"	Abbrev=BW	P-value=<0.05
2	Chr.2	38279249	38614109	21303	12184677	154346072	Name="Lumbar vertebra number"	Abbrev=LVNUM	P-value=<0.05
2	Chr.2	38279249	38614109	902	13366532	44483418	Name="pH 24 hr post-mortem (loin)"	Abbrev=pH
2	Chr.2	38279249	38614109	909	13366532	44483418	Name="Teat number"	Abbrev=TNUM
2	Chr.2	38279249	38614109	3780	13366532	100385940	Name="Drip loss"	Abbrev=DRIPL	P-value=<0.05
2	Chr.2	38279249	38614109	21848	13366532	46840491	Name="Drip loss"	Abbrev=DRIPL	P-value=<0.05
2	Chr.2	38279249	38614109	5685	13366532	154953107	Name="backfat at last rib"	Abbrev=LRIBF	P-value=<0.05
2	Chr.2	38279249	38614109	3810	13366532	100385940	Name="Off-Flavor Score"	Abbrev=OFFFLAV	P-value=<0.01
2	Chr.2	38279249	38614109	3809	13366532	100385940	Name="Firmness"	Abbrev=FIRM	P-value=<0.05
2	Chr.2	38279249	38614109	17998	13366532	75040316	Name="Average backfat thickness"	Abbrev=BFT
2	Chr.2	38279249	38614109	15066	13366532	131656956	Name="Cholesterol level"	Abbrev=CHOLS
2	Chr.2	38279249	38614109	7596	15441523	50079118	Name="Melanoma susceptibility"	Abbrev=MELAN	P-value=<0.05
2	Chr.2	38279249	38614109	21219	18576632	122130129	Name="Shoulder subcutaneous fat thickness"	Abbrev=SHOUFATD	P-value=<0.01
2	Chr.2	38279249	38614109	12318	19343556	150827358	Name="Tetanus antibody titer"	Abbrev=TETAB	P-value=<0.01
2	Chr.2	38279249	38614109	17715	21136167	38367026	Name="HDL cholesterol"	Abbrev=HDL	P-value=<0.05
2	Chr.2	38279249	38614109	29690	21136167	139359663	Name="Carcass length"	Abbrev=CRCL	P-value=<0.05
2	Chr.2	38279249	38614109	307	21136167	59648728	Name="Average backfat thickness"	Abbrev=BFT	P-value=0.0022
2	Chr.2	38279249	38614109	5686	21136167	38367026	Name="Side fat thickness"	Abbrev=BFS	P-value=<0.05
2	Chr.2	38279249	38614109	927	21136167	44483418	Name="Lean meat percentage"	Abbrev=LEANP
2	Chr.2	38279249	38614109	12747	21136167	119359590	Name="Fat-cuts percentage"	Abbrev=FATCP	P-value=<0.05
2	Chr.2	38279249	38614109	901	21136167	44483418	Name="Fat-cuts percentage"	Abbrev=FATCP
2	Chr.2	38279249	38614109	905	21136167	44483418	Name="Dressing percentage"	Abbrev=DRESS%
2	Chr.2	38279249	38614109	899	21136167	44483418	Name="Dressing percentage"	Abbrev=DRESS%
2	Chr.2	38279249	38614109	903	21136167	44483418	Name="Loin muscle area"	Abbrev=LMA
2	Chr.2	38279249	38614109	12748	21136167	119359590	Name="Fat to meat ratio"	Abbrev=FMR	P-value=<0.05
2	Chr.2	38279249	38614109	897	21136167	44483418	Name="Lean meat percentage"	Abbrev=LEANP
2	Chr.2	38279249	38614109	21852	21136167	44483418	Name="Stiffness"	Abbrev=STIFF	P-value=<0.05
2	Chr.2	38279249	38614109	900	21136167	44483418	Name="Fat-cuts percentage"	Abbrev=FATCP
2	Chr.2	38279249	38614109	16888	21136167	119359590	Name="average daily gain"	Abbrev=ADG	P-value=<0.05
2	Chr.2	38279249	38614109	1253	21136167	44483418	Name="Fat-cuts percentage"	Abbrev=FATCP
2	Chr.2	38279249	38614109	16898	21136167	75040316	Name="Carcass weight (hot)"	Abbrev=HCWT	P-value=<0.05
2	Chr.2	38279249	38614109	809	21136167	44483418	Name="Lean cuts percentage"	Abbrev=LEANCUTP
2	Chr.2	38279249	38614109	21324	21136167	53611728	Name="White blood cell counts"	Abbrev=WBC	P-value=<0.05
2	Chr.2	38279249	38614109	4025	21136167	75040316	Name="Percentage type IIa fibers"	Abbrev=FIB2AP	P-value=<0.01
2	Chr.2	38279249	38614109	17610	21136167	59648728	Name="Interferon-gamma level"	Abbrev=IFNG	P-value=<0.05
2	Chr.2	38279249	38614109	4205	21136167	122791407	Name="androstenone, laboratory"	Abbrev=ANDR	P-value=<0.05
2	Chr.2	38279249	38614109	21331	21136167	53611728	Name="White blood cell counts"	Abbrev=WBC
2	Chr.2	38279249	38614109	16883	21136167	75040316	Name="backfat at last rib"	Abbrev=LRIBF	P-value=<0.05
2	Chr.2	38279249	38614109	3867	24795034	42280622	Name="Leaf fat weight"	Abbrev=LFW	P-value=<0.05
2	Chr.2	38279249	38614109	3851	25252518	41353385	Name="Muscle moisture percentage"	Abbrev=MMP	P-value=<0.05
2	Chr.2	38279249	38614109	3940	25252518	48775112	Name="Semimembranosus angle"	Abbrev=SMANGL	P-value=0.22
2	Chr.2	38279249	38614109	9580	25252518	64352885	Name="Linoleic acid content"	Abbrev=FA-C18:2	P-value=0.000022
2	Chr.2	38279249	38614109	3868	28764390	42280622	Name="Loin muscle area"	Abbrev=LMA	P-value=<0.05
2	Chr.2	38279249	38614109	3107	29530258	53611728	Name="Fat to meat ratio"	Abbrev=FMR	P-value=<0.05
2	Chr.2	38279249	38614109	669	33031443	123480352	Name="Loin muscle depth"	Abbrev=LMDEP
2	Chr.2	38279249	38614109	15857	34221548	75082926	Name="Linoleic acid content"	Abbrev=FA-C18:2
2	Chr.2	38279249	38614109	15856	34221548	75082926	Name="Stearic acid content"	Abbrev=FA-C18:0
2	Chr.2	38279249	38614109	3778	34221548	100385940	Name="Body weight (16 days)"	Abbrev=16DWT	P-value=<0.05
2	Chr.2	38279249	38614109	3779	34221548	133160620	Name="Average daily gain (on weaning)"	Abbrev=ADG	P-value=<0.05
2	Chr.2	38279249	38614109	12665	35687241	65816994	Name="Drip loss"	Abbrev=DRIPL	P-value=<0.05
2	Chr.2	38279249	38614109	3224	35687241	48775112	Name="Juiciness score"	Abbrev=JUICE
2	Chr.2	38279249	38614109	21354	35687241	48775112	Name="Juiciness score"	Abbrev=JUICE	P-value=0.001
2	Chr.2	113417117	113584309	5432	609757	157789611	Name="Carcass weight (hot)"	Abbrev=HCWT
2	Chr.2	113417117	113584309	5437	609757	157789611	Name="Ham weight"	Abbrev=HAMWT
2	Chr.2	113417117	113584309	5438	609757	157789611	Name="Shoulder weight"	Abbrev=SHOUWT
2	Chr.2	113417117	113584309	5440	609757	157789611	Name="Shear firmness"	Abbrev=SHFRM
2	Chr.2	113417117	113584309	5496	609757	157789611	Name="Cutlet weight"	Abbrev=CUTL
2	Chr.2	113417117	113584309	5688	609757	133375944	Name="Loin muscle area"	Abbrev=LMA	P-value=<0.05
2	Chr.2	113417117	113584309	9612	609757	162569375	Name="C3c concentration	Abbrev=C3C;	P-value=<0.01
2	Chr.2	113417117	113584309	9613	609757	162569375	Name="C3c concentration"	Abbrev=C3C	P-value=<0.05
2	Chr.2	113417117	113584309	9614	609757	162569375	Name="C3c concentration"	Abbrev=C3C	P-value=<0.05
2	Chr.2	113417117	113584309	5689	609757	154953107	Name="Fat to meat ratio"	Abbrev=FMR	P-value=<0.05
2	Chr.2	113417117	113584309	7576	2387169	133160620	Name="Melanoma susceptibility"	Abbrev=MELAN	P-value=<0.05
2	Chr.2	113417117	113584309	5690	2387169	154953107	Name="Belly meat content"	Abbrev=BYLEAN	P-value=<0.05
2	Chr.2	113417117	113584309	5691	2387169	154953107	Name="Estimated carcass lean content"	Abbrev=ECLC	P-value=<0.05
2	Chr.2	113417117	113584309	21214	2948442	138050552	Name="Abdominal fat weight"	Abbrev=ABDF	P-value=<0.01
2	Chr.2	113417117	113584309	21212	2948442	137276970	Name="Average backfat thickness"	Abbrev=BFT	P-value=<0.05
2	Chr.2	113417117	113584309	21213	4798534	131599097	Name="Abdominal fat weight"	Abbrev=ABDF	P-value=<0.01
2	Chr.2	113417117	113584309	5242	5101784	150528181	Name="backfat at mid-back"	Abbrev=BFM	P-value=<0.05
2	Chr.2	113417117	113584309	5218	6662614	140912872	Name="Shoulder subcutaneous fat thickness"	Abbrev=SHOUFATD	P-value=<0.05
2	Chr.2	113417117	113584309	5208	7804743	150596593	Name="backfat at mid-back"	Abbrev=BFM	P-value=<0.05
2	Chr.2	113417117	113584309	5199	9758855	150135089	Name="Body weight (end of test)"	Abbrev=BW	P-value=<0.05
2	Chr.2	113417117	113584309	21303	12184677	154346072	Name="Lumbar vertebra number"	Abbrev=LVNUM	P-value=<0.05
2	Chr.2	113417117	113584309	15066	13366532	131656956	Name="Cholesterol level"	Abbrev=CHOLS
2	Chr.2	113417117	113584309	21219	18576632	122130129	Name="Shoulder subcutaneous fat thickness"	Abbrev=SHOUFATD	P-value=<0.01
2	Chr.2	113417117	113584309	12318	19343556	150827358	Name="Tetanus antibody titer"	Abbrev=TETAB	P-value=<0.01
2	Chr.2	113417117	113584309	29690	21136167	139359663	Name="Carcass length"	Abbrev=CRCL	P-value=<0.05
2	Chr.2	113417117	113584309	12747	21136167	119359590	Name="Fat-cuts percentage"	Abbrev=FATCP	P-value=<0.05
2	Chr.2	113417117	113584309	12748	21136167	119359590	Name="Fat to meat ratio"	Abbrev=FMR	P-value=<0.05
2	Chr.2	113417117	113584309	16888	21136167	119359590	Name="average daily gain"	Abbrev=ADG	P-value=<0.05
2	Chr.2	113417117	113584309	4205	21136167	122791407	Name="androstenone, laboratory"	Abbrev=ANDR	P-value=<0.05
2	Chr.2	113417117	113584309	669	33031443	123480352	Name="Loin muscle depth"	Abbrev=LMDEP
2	Chr.2	113417117	113584309	3779	34221548	133160620	Name="Average daily gain (on weaning)"	Abbrev=ADG	P-value=<0.05
2	Chr.2	113417117	113584309	5682	38367026	157789611	Name="pH for Semimembranosus"	Abbrev=pH	P-value=<0.05
2	Chr.2	113417117	113584309	82	38367026	119359590	Name="Meat color-L"	Abbrev=MCOLOR-L
2	Chr.2	113417117	113584309	9615	38367026	162569375	Name="C3c concentration"	Abbrev=C3C	P-value=<0.05
2	Chr.2	113417117	113584309	12317	38367026	151463344	Name="Mycoplasma hyopneumoniae antibody titer"	Abbrev=MHT	P-value=<0.05
2	Chr.2	113417117	113584309	3985	41353385	133375944	Name="Cooking loss"	Abbrev=COOKL	P-value=0.30
2	Chr.2	113417117	113584309	3938	41353385	157789611	Name="Ham fat thickness"	Abbrev=HFT	P-value=0.59
2	Chr.2	113417117	113584309	3982	41353385	157789611	Name="CIE-b*"	Abbrev=CIEb	P-value=0.07
2	Chr.2	113417117	113584309	3984	41353385	157789611	Name="Water holding capacity"	Abbrev=WHC	P-value=0.59
2	Chr.2	113417117	113584309	5251	44409258	140000086	Name="Shoulder subcutaneous fat thickness"	Abbrev=SHOUFATD	P-value=<0.01
2	Chr.2	113417117	113584309	3225	48775112	131656956	Name="Off-Flavor Score"	Abbrev=OFFFLAV
2	Chr.2	113417117	113584309	21355	48775112	131656956	Name="Carcass temperature (45 minutes post-mortem)"	Abbrev=45CARTEMP	P-value=0.001
2	Chr.2	113417117	113584309	12102	59648728	157789611	Name="pH 24 hr post-mortem (loin)"	Abbrev=pH	P-value=0.0002
2	Chr.2	113417117	113584309	12103	59648728	157789611	Name="Cooking loss"	Abbrev=COOKL	P-value=0.03
2	Chr.2	113417117	113584309	12104	59648728	157789611	Name="Cooking loss"	Abbrev=COOKL	P-value=0.04
2	Chr.2	113417117	113584309	12105	59648728	157789611	Name="Intramuscular fat content"	Abbrev=IMF	P-value=0.05
2	Chr.2	113417117	113584309	12106	59648728	157789611	Name="Shear force"	Abbrev=SHEAR	P-value=0.03
2	Chr.2	113417117	113584309	12107	59648728	157789611	Name="Ham weight"	Abbrev=HAMWT	P-value=0.008
2	Chr.2	113417117	113584309	12108	59648728	157789611	Name="Estimated carcass lean content"	Abbrev=ECLC	P-value=0.009
2	Chr.2	113417117	113584309	12109	59648728	157789611	Name="Ham weight"	Abbrev=HAMWT	P-value=0.0005
2	Chr.2	113417117	113584309	5684	59648728	157789611	Name="Shear force"	Abbrev=SHEAR	P-value=<0.05
2	Chr.2	113417117	113584309	21215	70124078	125622966	Name="Backfat at first rib"	Abbrev=1RIBBFT	P-value=<0.01
2	Chr.2	113417117	113584309	670	72813988	122153206	Name="Loin muscle area"	Abbrev=LMA
2	Chr.2	113417117	113584309	11558	75040316	121864622	Name="Salmonella count in liver and spleen"	Abbrev=SECTLS	P-value=0.040
2	Chr.2	113417117	113584309	11559	75040316	121864622	Name="Salmonella count in liver"	Abbrev=SECTLIV	P-value=0.017
2	Chr.2	113417117	113584309	12745	75040316	119359590	Name="Shoulder external fat weight"	Abbrev=EFATSHO	P-value=<0.05
2	Chr.2	113417117	113584309	7310	75040316	125047558	Name="Loin muscle area"	Abbrev=LMA	P-value=9.8E-7
2	Chr.2	113417117	113584309	12746	75040316	119359590	Name="Backfat weight"	Abbrev=BFW	P-value=<0.01
2	Chr.2	113417117	113584309	7309	75040316	125047558	Name="Carcass weight (hot)"	Abbrev=HCWT	P-value=0.000024
2	Chr.2	113417117	113584309	12743	75040316	119359590	Name="Carcass weight (cold)"	Abbrev=CWT	P-value=<0.05
2	Chr.2	113417117	113584309	16899	75040316	135266453	Name="Carcass weight (hot)"	Abbrev=HCWT	P-value=<0.05
2	Chr.2	113417117	113584309	2796	82717608	128992198	Name="Diameter of type IIb muscle fibers"	Abbrev=FIB2BDIAM
2	Chr.2	113417117	113584309	2797	82717608	128992198	Name="Diameter of type IIa muscle fibers"	Abbrev=FIB2ADIAM
2	Chr.2	113417117	113584309	2798	82717608	128992198	Name="Diameter of muscle fibers"	Abbrev=DIAMF
2	Chr.2	113417117	113584309	21218	85135844	149834563	Name="Leaf fat weight"	Abbrev=LFW	P-value=<0.01
2	Chr.2	113417117	113584309	21211	89755188	131594228	Name="Average backfat thickness"	Abbrev=BFT	P-value=<0.01
2	Chr.2	113417117	113584309	8899	100385940	125047558	Name="Ear erectness"	Abbrev=EARER	P-value=<0.01
2	Chr.2	113417117	113584309	21837	100385940	125047558	Name="Gestation length"	Abbrev=GEST	P-value=<0.05
2	Chr.2	113417117	113584309	5161	100385940	133375944	Name="Feed intake (120-140 kg)"	Abbrev=FEEDIN	P-value=<0.05
2	Chr.2	113417117	113584309	3040	113067669	113878157	Name="Inguinal hernia"	Abbrev=IHERN	P-value=0.002
2	Chr.2	113417117	113584309	8771	113067669	113878157	Name="Inguinal hernia"	Abbrev=IHERN	P-value=0.007
2	Chr.2	125940877	126022431	5432	609757	157789611	Name="Carcass weight (hot)"	Abbrev=HCWT
2	Chr.2	125940877	126022431	5437	609757	157789611	Name="Ham weight"	Abbrev=HAMWT
2	Chr.2	125940877	126022431	5438	609757	157789611	Name="Shoulder weight"	Abbrev=SHOUWT
2	Chr.2	125940877	126022431	5440	609757	157789611	Name="Shear firmness"	Abbrev=SHFRM
2	Chr.2	125940877	126022431	5496	609757	157789611	Name="Cutlet weight"	Abbrev=CUTL
2	Chr.2	125940877	126022431	5688	609757	133375944	Name="Loin muscle area"	Abbrev=LMA	P-value=<0.05
2	Chr.2	125940877	126022431	9612	609757	162569375	Name="C3c concentration	Abbrev=C3C;	P-value=<0.01
2	Chr.2	125940877	126022431	9613	609757	162569375	Name="C3c concentration"	Abbrev=C3C	P-value=<0.05
2	Chr.2	125940877	126022431	9614	609757	162569375	Name="C3c concentration"	Abbrev=C3C	P-value=<0.05
2	Chr.2	125940877	126022431	5689	609757	154953107	Name="Fat to meat ratio"	Abbrev=FMR	P-value=<0.05
2	Chr.2	125940877	126022431	7576	2387169	133160620	Name="Melanoma susceptibility"	Abbrev=MELAN	P-value=<0.05
2	Chr.2	125940877	126022431	5690	2387169	154953107	Name="Belly meat content"	Abbrev=BYLEAN	P-value=<0.05
2	Chr.2	125940877	126022431	5691	2387169	154953107	Name="Estimated carcass lean content"	Abbrev=ECLC	P-value=<0.05
2	Chr.2	125940877	126022431	21214	2948442	138050552	Name="Abdominal fat weight"	Abbrev=ABDF	P-value=<0.01
2	Chr.2	125940877	126022431	21212	2948442	137276970	Name="Average backfat thickness"	Abbrev=BFT	P-value=<0.05
2	Chr.2	125940877	126022431	21213	4798534	131599097	Name="Abdominal fat weight"	Abbrev=ABDF	P-value=<0.01
2	Chr.2	125940877	126022431	5242	5101784	150528181	Name="backfat at mid-back"	Abbrev=BFM	P-value=<0.05
2	Chr.2	125940877	126022431	5218	6662614	140912872	Name="Shoulder subcutaneous fat thickness"	Abbrev=SHOUFATD	P-value=<0.05
2	Chr.2	125940877	126022431	5208	7804743	150596593	Name="backfat at mid-back"	Abbrev=BFM	P-value=<0.05
2	Chr.2	125940877	126022431	5199	9758855	150135089	Name="Body weight (end of test)"	Abbrev=BW	P-value=<0.05
2	Chr.2	125940877	126022431	21303	12184677	154346072	Name="Lumbar vertebra number"	Abbrev=LVNUM	P-value=<0.05
2	Chr.2	125940877	126022431	15066	13366532	131656956	Name="Cholesterol level"	Abbrev=CHOLS
2	Chr.2	125940877	126022431	12318	19343556	150827358	Name="Tetanus antibody titer"	Abbrev=TETAB	P-value=<0.01
2	Chr.2	125940877	126022431	29690	21136167	139359663	Name="Carcass length"	Abbrev=CRCL	P-value=<0.05
2	Chr.2	125940877	126022431	3779	34221548	133160620	Name="Average daily gain (on weaning)"	Abbrev=ADG	P-value=<0.05
2	Chr.2	125940877	126022431	5682	38367026	157789611	Name="pH for Semimembranosus"	Abbrev=pH	P-value=<0.05
2	Chr.2	125940877	126022431	9615	38367026	162569375	Name="C3c concentration"	Abbrev=C3C	P-value=<0.05
2	Chr.2	125940877	126022431	12317	38367026	151463344	Name="Mycoplasma hyopneumoniae antibody titer"	Abbrev=MHT	P-value=<0.05
2	Chr.2	125940877	126022431	3985	41353385	133375944	Name="Cooking loss"	Abbrev=COOKL	P-value=0.30
2	Chr.2	125940877	126022431	3938	41353385	157789611	Name="Ham fat thickness"	Abbrev=HFT	P-value=0.59
2	Chr.2	125940877	126022431	3982	41353385	157789611	Name="CIE-b*"	Abbrev=CIEb	P-value=0.07
2	Chr.2	125940877	126022431	3984	41353385	157789611	Name="Water holding capacity"	Abbrev=WHC	P-value=0.59
2	Chr.2	125940877	126022431	5251	44409258	140000086	Name="Shoulder subcutaneous fat thickness"	Abbrev=SHOUFATD	P-value=<0.01
2	Chr.2	125940877	126022431	3225	48775112	131656956	Name="Off-Flavor Score"	Abbrev=OFFFLAV
2	Chr.2	125940877	126022431	21355	48775112	131656956	Name="Carcass temperature (45 minutes post-mortem)"	Abbrev=45CARTEMP	P-value=0.001
2	Chr.2	125940877	126022431	12102	59648728	157789611	Name="pH 24 hr post-mortem (loin)"	Abbrev=pH	P-value=0.0002
2	Chr.2	125940877	126022431	12103	59648728	157789611	Name="Cooking loss"	Abbrev=COOKL	P-value=0.03
2	Chr.2	125940877	126022431	12104	59648728	157789611	Name="Cooking loss"	Abbrev=COOKL	P-value=0.04
2	Chr.2	125940877	126022431	12105	59648728	157789611	Name="Intramuscular fat content"	Abbrev=IMF	P-value=0.05
2	Chr.2	125940877	126022431	12106	59648728	157789611	Name="Shear force"	Abbrev=SHEAR	P-value=0.03
2	Chr.2	125940877	126022431	12107	59648728	157789611	Name="Ham weight"	Abbrev=HAMWT	P-value=0.008
2	Chr.2	125940877	126022431	12108	59648728	157789611	Name="Estimated carcass lean content"	Abbrev=ECLC	P-value=0.009
2	Chr.2	125940877	126022431	12109	59648728	157789611	Name="Ham weight"	Abbrev=HAMWT	P-value=0.0005
2	Chr.2	125940877	126022431	5684	59648728	157789611	Name="Shear force"	Abbrev=SHEAR	P-value=<0.05
2	Chr.2	125940877	126022431	16899	75040316	135266453	Name="Carcass weight (hot)"	Abbrev=HCWT	P-value=<0.05
2	Chr.2	125940877	126022431	21218	85135844	149834563	Name="Leaf fat weight"	Abbrev=LFW	P-value=<0.01
2	Chr.2	125940877	126022431	21211	89755188	131594228	Name="Average backfat thickness"	Abbrev=BFT	P-value=<0.01
2	Chr.2	125940877	126022431	5161	100385940	133375944	Name="Feed intake (120-140 kg)"	Abbrev=FEEDIN	P-value=<0.05
2	Chr.2	125940877	126022431	31840	116028974	145137405	QName="Corpus luteum number"	Abbrev=CLN	P-value=0.005
2	Chr.2	125940877	126022431	919	119359590	135266453	Name="Ham weight"	Abbrev=HAMWT
2	Chr.2	125940877	126022431	920	119359590	135266453	Name="Backfat weight"	Abbrev=BFW
2	Chr.2	125940877	126022431	22288	125009891	125989308	Name="Average backfat thickness"	Abbrev=BFT
2	Chr.2	125940877	126022431	22289	125009891	125989308	Name="Average backfat thickness"	Abbrev=BFT	P-value=<0.01
2	Chr.2	125940877	126022431	2977	125047558	131656956	Name="Shear force"	Abbrev=SHEAR	P-value=0.00046
2	Chr.2	158549163	159250446	9612	609757	162569375	Name="C3c concentration	Abbrev=C3C;	P-value=<0.01
2	Chr.2	158549163	159250446	9613	609757	162569375	Name="C3c concentration"	Abbrev=C3C	P-value=<0.05
2	Chr.2	158549163	159250446	9614	609757	162569375	Name="C3c concentration"	Abbrev=C3C	P-value=<0.05
2	Chr.2	158549163	159250446	9615	38367026	162569375	Name="C3c concentration"	Abbrev=C3C	P-value=<0.05
2	Chr.2	158549163	159250446	434	142363071	162569375	Name="Feet weight"	Abbrev=FEETWT	P-value=<0.1
2	Chr.2	158549163	159250446	23169	151463344	158935864	QName="Shoulder weight"	Abbrev=SHOUWT	P-value=2.8E-4
2	Chr.2	158549163	159250446	92	157916972	162569375	Name="Flavor score"	Abbrev=FLAV
2	Chr.2	158549163	159250446	2799	157916972	162569375	Name="Total muscle fiber number"	Abbrev=TNMF
2	Chr.2	160400099	160455016	9612	609757	162569375	Name="C3c concentration	Abbrev=C3C;	P-value=<0.01
2	Chr.2	160400099	160455016	9613	609757	162569375	Name="C3c concentration"	Abbrev=C3C	P-value=<0.05
2	Chr.2	160400099	160455016	9614	609757	162569375	Name="C3c concentration"	Abbrev=C3C	P-value=<0.05
2	Chr.2	160400099	160455016	9615	38367026	162569375	Name="C3c concentration"	Abbrev=C3C	P-value=<0.05
2	Chr.2	160400099	160455016	434	142363071	162569375	Name="Feet weight"	Abbrev=FEETWT	P-value=<0.1
2	Chr.2	160400099	160455016	92	157916972	162569375	Name="Flavor score"	Abbrev=FLAV
2	Chr.2	160400099	160455016	2799	157916972	162569375	Name="Total muscle fiber number"	Abbrev=TNMF
3	Chr.3	5713062	5763996	2801	1456046	14776389	Name="Percentage giant fibers"	Abbrev=GFIBP
3	Chr.3	5713062	5763996	2	1456046	14885297	Name="Carcass weight (hot)"	Abbrev=HCWT
3	Chr.3	5713062	5763996	893	1456046	21947993	Name="Abdominal fat weight"	Abbrev=ABDF
3	Chr.3	5713062	5763996	5085	1456046	98066155	Name="Lactate dehydrogenase level"	Abbrev=LDH
3	Chr.3	5713062	5763996	3226	1456046	21947993	Name="45 min-24 h pH decline"	Abbrev=PHDEC
3	Chr.3	5713062	5763996	5224	1456046	130209174	Name="Teat number"	Abbrev=TNUM	P-value=<0.05
3	Chr.3	5713062	5763996	515	4571903	82495610	Name="Corpus luteum number"	Abbrev=CLN
3	Chr.3	5713062	5763996	5234	4656907	140465858	Name="Body weight (end of test)"	Abbrev=BW	P-value=<0.05
3	Chr.3	5713062	5763996	16861	5254374	21947993	Name="Carcass weight (hot)"	Abbrev=HCWT	P-value=0.0001
3	Chr.3	5713062	5763996	48	5384958	6188004	Name="Body weight (birth)"	Abbrev=BW
3	Chr.3	12159746	12206694	2801	1456046	14776389	Name="Percentage giant fibers"	Abbrev=GFIBP
3	Chr.3	12159746	12206694	2	1456046	14885297	Name="Carcass weight (hot)"	Abbrev=HCWT
3	Chr.3	12159746	12206694	893	1456046	21947993	Name="Abdominal fat weight"	Abbrev=ABDF
3	Chr.3	12159746	12206694	5085	1456046	98066155	Name="Lactate dehydrogenase level"	Abbrev=LDH
3	Chr.3	12159746	12206694	3226	1456046	21947993	Name="45 min-24 h pH decline"	Abbrev=PHDEC
3	Chr.3	12159746	12206694	5224	1456046	130209174	Name="Teat number"	Abbrev=TNUM	P-value=<0.05
3	Chr.3	12159746	12206694	515	4571903	82495610	Name="Corpus luteum number"	Abbrev=CLN
3	Chr.3	12159746	12206694	5234	4656907	140465858	Name="Body weight (end of test)"	Abbrev=BW	P-value=<0.05
3	Chr.3	12159746	12206694	16861	5254374	21947993	Name="Carcass weight (hot)"	Abbrev=HCWT	P-value=0.0001
3	Chr.3	12159746	12206694	3947	6188004	14776389	Name="Vertebra number"	Abbrev=VNUM	P-value=0.28
3	Chr.3	12159746	12206694	8855	6188004	21947993	Name="Ear weight"	Abbrev=EARWT
3	Chr.3	12159746	12206694	21356	6188004	21947993	Name="Carcass temperature (45 minutes post-mortem)"	Abbrev=45CARTEMP	P-value=1.86E-5
3	Chr.3	12159746	12206694	2743	6188004	21947993	Name="Backfat at tenth rib (10 weeks)"	Abbrev=1010RIBBF
3	Chr.3	12159746	12206694	8900	6188004	21947993	Name="Ear erectness"	Abbrev=EARER
3	Chr.3	12159746	12206694	18043	11849890	15602053	Name="Corpus luteum number"	Abbrev=CLN	P-value=<0.005
3	Chr.3	12159746	12206694	5877	12203325	12419966	Name="pH for Semimembranosus"	Abbrev=pH	P-value=<0.05
3	Chr.3	16913373	16920601	893	1456046	21947993	Name="Abdominal fat weight"	Abbrev=ABDF
3	Chr.3	16913373	16920601	5085	1456046	98066155	Name="Lactate dehydrogenase level"	Abbrev=LDH
3	Chr.3	16913373	16920601	3226	1456046	21947993	Name="45 min-24 h pH decline"	Abbrev=PHDEC
3	Chr.3	16913373	16920601	5224	1456046	130209174	Name="Teat number"	Abbrev=TNUM	P-value=<0.05
3	Chr.3	16913373	16920601	515	4571903	82495610	Name="Corpus luteum number"	Abbrev=CLN
3	Chr.3	16913373	16920601	5234	4656907	140465858	Name="Body weight (end of test)"	Abbrev=BW	P-value=<0.05
3	Chr.3	16913373	16920601	16861	5254374	21947993	Name="Carcass weight (hot)"	Abbrev=HCWT	P-value=0.0001
3	Chr.3	16913373	16920601	8855	6188004	21947993	Name="Ear weight"	Abbrev=EARWT
3	Chr.3	16913373	16920601	21356	6188004	21947993	Name="Carcass temperature (45 minutes post-mortem)"	Abbrev=45CARTEMP	P-value=1.86E-5
3	Chr.3	16913373	16920601	2743	6188004	21947993	Name="Backfat at tenth rib (10 weeks)"	Abbrev=1010RIBBF
3	Chr.3	16913373	16920601	8900	6188004	21947993	Name="Ear erectness"	Abbrev=EARER
3	Chr.3	16913373	16920601	497	13949105	21947993	Name="average daily gain (weaning-55 kg)"	Abbrev=ADG	P-value=0.0800
3	Chr.3	16913373	16920601	300	13949105	49051751	Name="pH 24 hr post-mortem (loin)"	Abbrev=pH	P-value=0.0800
3	Chr.3	16913373	16920601	4119	14776389	21947993	Name="average daily gain"	Abbrev=ADG	P-value=<0.05
3	Chr.3	16913373	16920601	4120	14776389	21947993	Name="average daily gain"	Abbrev=ADG	P-value=<0.05
3	Chr.3	16913373	16920601	4121	14776389	21947993	Name="backfat at P2 position"	Abbrev=BFT	P-value=<0.05
3	Chr.3	16913373	16920601	4122	14776389	21947993	Name="Carcass length"	Abbrev=CRCL	P-value=<0.05
3	Chr.3	16913373	16920601	4123	14776389	21947993	Name="pH for Longissmus Dorsi"	Abbrev=pH	P-value=<0.05
3	Chr.3	16913373	16920601	4124	14776389	21947993	Name="pH for Semimembranosus"	Abbrev=pH	P-value=<0.05
3	Chr.3	16913373	16920601	4178	14776389	21947993	Name="Conductivity 45 minutes post-mortem"	Abbrev=COND	P-value=<0.05
3	Chr.3	16913373	16920601	5431	14776389	21947993	Name="hematocrit"	Abbrev=HCT	P-value=<0.05
3	Chr.3	16913373	16920601	6322	14776389	21947993	Name="Blood pH"	Abbrev=BLPH	P-value=<0.05
3	Chr.3	16913373	16920601	6324	14776389	21947993	Name="Blood pH"	Abbrev=BLPH	P-value=<0.01
3	Chr.3	16913373	16920601	6360	14776389	21947993	Name="Lactate level"	Abbrev=BLACT	P-value=<0.01
[truncated: 5,678 more rows]

## Sheet: Table F
Table F. Comparison between identified CNVRs and those reported in other pig CNVR papers
Table F-1. Comparison with Wangjiying et al.(2014)
Our results						other study's results
CNVR ID	Chr.	CNVR Start	CNVR End	Length(Kb)	Type	CNVR ID	Chr.	CNVR Start	CNVR End	Length(Kb)	Type
CNVR12	1	284443528	284486575	43047	gain	CNV87	1	284428678	284521660	92983	loss
CNVR13	1	294821198	294867674	46476	gain	CNV94	1	294851334	294863534	12201	gain
CNVR14	1	295241692	295462741	221049	gain	CNV98	1	295269632	295502510	232879	loss
CNVR15	1	296616443	296747604	131161	loss	CNV102	1	296711271	296718345	7075	loss
CNVR16	1	296787813	296854248	66435	gain	CNV103	1	296764601	296806737	42137	gain
CNVR17	1	311929352	312829468	900116	both	CNV114	1	312094822	312112907	18086	loss
						CNV115	1	312164343	312852199	687857	loss
CNVR18	1	313111618	313480723	369105	both	CNV116	1	312971103	313676516	705414	both
CNVR20	2	15202906	15501488	298582	gain	CNVR134	2	15247293	15281989	34697	loss
						CNVR135	2	15283945	15308579	24635	loss
						CNVR136	2	15390673	15418881	28209	gain
CNVR25	2	38279249	38614109	334860	gain	CNVR144	2	38292966	38309936	16971	loss
CNVR28	2	158549163	159250446	701283	gain	CNVR191	2	158549190	158604534	55345	loss
						CNVR192	2	158606177	158613505	7329	gain
						CNVR193	2	158649681	158658893	9213	gain
						CNVR194	2	158968473	159031765	63293	gain
CNVR35	3	64807120	65138723	331603	loss	CNVR238	3	64773751	65220973	447223	loss
CNVR43	5	3813901	3844970	31069	gain	CNVR332	5	3762575	3871156	108582	gain
CNVR44	5	21238084	21339891	101807	gain	CNVR344	5	21136439	21382876	246438	gain
CNVR52	7	1532038	1681623	149585	loss	CNVR460	7	1556295	1564449	8155	loss
CNVR54	7	25215084	26187687	972603	both	CNVR476	7	25272836	25295693	22858	gain
						CNVR477	7	25350882	26669887	1319006	both
CNVR60	8	43462399	43878303	415904	gain	CNVR584	8	43313707	43894062	580356	gain
CNVR68	9	125100668	125316966	216298	gain	CNVR723	9	125159518	125170069	10552	loss
CNVR71	10	5471679	5608014	136335	both	CNVR744	10	5517287	5521657	4371	loss
CNVR79	11	70685626	71912745	1227119	both	CNVR859	11	70603545	70731813	128269	loss
						CNVR860	11	70732658	71492146	759489	both
						CNVR861	11	71558296	71575545	17250	gain
						CNVR862	11	71685672	71731275	45604	gain
CNVR82	12	50892615	50930355	37740	gain	CNVR892	12	50875759	51253912	378154	both
CNVR102	13	192739452	194386412	1646960	gain	CNVR957	13	193196894	193218718	21825	loss
CNVR104	13	195638599	197656323	2017724	both	CNVR958	13	195663381	195672703	9323	loss
CNVR106	13	199308789	202728252	3419463	gain	CNVR960	13	199348049	199361490	13442	gain
CNVR107	13	203080799	205804998	2724199	gain	CNVR963	13	203173357	203229001	55645	gain
CNVR111	13	209155239	212757383	3602144	both	CNVR965	13	210319884	210332180	12297	loss
						CNVR966	13	211729795	211733369	3575	loss
CNVR138	16	44362264	44429692	67428	loss	CNVR1132	16	44381668	44430687	49020	loss
CNVR142	17	15175	249970	234795	gain	CNVR1151	17	5439	454437	448999	loss
CNVR143	17	435637	447979	12342	gain
CNVR146	18	23727309	23813414	86105	loss	CNVR1218	18	23801727	23819649	17923	gain
CNVR150	X	124740	1280682	1155942	gain	CNVR1241	X	401	335086	334686	gain
						CNVR1242	X	336837	438124	101288	gain
						CNVR1243	X	669470	740947	71478	loss
						CNVR1244	X	742198	750795	8598	gain
						CNVR1245	X	941950	960702	18753	loss
CNVR153	X	11345780	11443525	97745	gain	CNVR1255	X	11399645	11414260	14616	gain
CNVR166	X	87901203	92882230	4981027	gain	CNVR1318	X	89125400	89136318	10919	loss
						CNVR1319	X	91199797	91210413	10617	loss
						CNVR1320	X	91329230	91359396	30167	loss
						CNVR1321	X	92595607	92608954	13348	loss
CNVR151	X	1346356	6798065	5451709	gain	CNVR1246	X	1739532	1743938	4407	loss
						CNVR1247	X	3571857	3580134	8278	loss
						CNVR1248	X	3971257	4011084	39828	gain
						CNVR1249	X	4792216	4800813	8598	loss
						CNVR1250	X	5188770	5192620	3851	gain
						CNVR1251	X	5492310	5506793	14484	gain
Table F-2. Comparison with Jiying Wang et al.(2013)
Our results						other study's results
CNVR ID	Chr.	CNVR Start	CNVR End	Length(Kb)	Type	CNVR ID	Chr.	CNVR Start	CNVR End	Length(Kb)	Type
CNVR10	1	268547138	268597486	50348	gain	5	1	268577902	268772498	194597	both
CNVR14	1	295241692	295462741	221049	gain	6	1	295241692	295379020	137329	gain
CNVR15	1	296616443	296747604	131161	loss	7	1	296533542	296809518	275977	gain
CNVR17	1	311929352	312829468	900116	both	8	1	312613914	312829468	215555	loss
CNVR45	5	26724414	26895376	170962	loss	47	5	26724414	26895376	170963	loss
CNVR58	7	133427075	133522529	95454	gain	55	7	133400942	133461877	60936	gain
CNVR60	8	43462399	43878303	415904	gain	57	8	43651639	43691362	39724	loss
CNVR70	9	148997109	149000304	3195	gain	63	9	148997109	149000304	3196	loss
CNVR79	11	70685626	71912745	1227119	both	12	11	70508069	71089190	581122	gain
CNVR90	13	158026997	158150530	123533	loss	16	13	157900973	158150530	249558	loss
CNVR92	13	172288990	172299433	10443	gain	18	13	172288990	172513713	224724	gain
CNVR99	13	188485623	190407651	1922028	both	19	13	190029235	190274455	245221	gain
CNVR116	14	3815879	3862162	46283	loss	20	14	3815879	3862162	46284	loss
CNVR119	14	63336064	63401735	65671	gain	22	14	63361100	63432487	71388	loss
CNVR130	15	13314232	13371964	57732	gain	27	15	13218467	13325812	107346	loss
CNVR142	17	15175	249970	234795	gain	33	17	15175	435637	420463	gain
CNVR149	18	53956586	54010221	53635	loss	40	18	53956586	54010221	53636	loss
Table F-3. Comparison with Jiying Wang., et al. (2012)
Our results						other study's results
CNVR ID	Chr.	CNVR Start	CNVR End	Length(Kb)	Type	CNVR ID	Chr.	CNVR Start	CNVR End	Length(Kb)	Type
CNVR22	2	24340490	24536667	196177	loss	266	2	24483546	24539169	55623	loss
CNVR54	7	25215084	26187687	972603	both	343	7	25049647	25870422	820775	both
CNVR55	7	81790769	82096915	306146	loss	349	7	81971222	82109013	137791	loss
CNVR66	9	3598721	3721967	123246	gain	372	9	3691715	3869659	177944	gain
CNVR67	9	4297475	4336627	39152	gain	373	9	4203824	4364337	160513	loss
CNVR74	10	52025204	52249156	223952	loss	39	10	51964406	52640886	676480	loss
CNVR76	11	37260128	37328150	68022	loss	52	11	36413191	37653953	1240762	loss
CNVR81	12	15826689	15883731	57042	gain	78	12	15742865	15879459	136594	both
CNVR85	13	110509364	110802738	293374	gain	128	13	110477260	110744163	266903	loss
CNVR123	14	89402153	89494786	92633	loss	171	14	89387664	89434133	46469	loss
CNVR142	17	15175	249970	234795	gain	242	17	36672	998828	962156	both
Table F-4. Comparison with Yanan Wang., et al.(2014)
Our results						other study's results
CNVR ID	Chr.	CNVR Start	CNVR End	Length(Kb)	Type	CNVR ID	Chr.	CNVR Start	CNVR End	Length(Kb)	Type
CNVR4	1	67370311	67458584	88273	loss	10	chr1	66263343	70920102	4656759	loss
CNVR6	1	99692675	100080552	387877	gain	13	chr1	99869938	100098510	228572	loss
CNVR8	1	192734647	192978414	243767	both	25	chr1	192637720	192978414	340694	both
CNVR9	1	193873995	194258004	384009	loss	26	chr1	193610977	194293541	682564	loss
CNVR22	2	24340490	24536667	196177	loss	47	chr2	24003403	24355934	352531	loss
CNVR23	2	25815932	25926589	110657	loss	49	chr2	25815932	25977149	161217	loss
CNVR24	2	36580946	36661408	80462	loss	50	chr2	35831507	36714801	883294	loss
CNVR25	2	38279249	38614109	334860	gain	52	chr2	38144228	38602507	458279	both
CNVR26	2	113417117	113584309	167192	loss	65	chr2	113160574	116470460	3309886	both
CNVR33	3	17349049	17405985	56936	loss	72	chr3	17401867	17428593	26726	loss
CNVR40	4	26165289	26267023	101734	loss	93	chr4	25283221	27846293	2563072	loss
CNVR41	4	27041022	27197523	156501	both
CNVR45	5	26724414	26895376	170962	loss	114	chr5	26724414	26895376	170962	loss
CNVR46	5	27258927	27814032	555105	loss	115	chr5	27258927	27391528	132601	loss
CNVR47	5	39588852	39799087	210235	gain	118	chr5	39588852	39916475	327623	loss
CNVR50	6	13731502	13812780	81278	gain	131	chr6	13631695	13812780	181085	loss
CNVR55	7	81790769	82096915	306146	loss	154	chr7	81753305	82401282	647977	loss
CNVR60	8	43462399	43878303	415904	gain	164	chr8	43425758	43878303	452545	gain
CNVR61	8	114392956	114436979	44023	loss	175	chr8	114348554	114583053	234499	loss
CNVR64	8	132945670	133158855	213185	loss	179	chr8	133098927	133212829	113902	loss
CNVR67	9	4297475	4336627	39152	gain	185	chr9	4297475	4336627	39152	gain
CNVR69	9	148655056	148691522	36466	gain	205	chr9	148495881	148681260	185379	loss
CNVR71	10	5471679	5608014	136335	both	208	chr10	4976864	5608014	631150	both
CNVR79	11	70685626	71912745	1227119	both	230	chr11	70508069	71130475	622406	gain
						231	chr11	71579110	71737104	157994	gain
CNVR84	13	38657796	38691669	33873	loss	246	chr13	38657796	38691669	33873	both
CNVR90	13	158026997	158150530	123533	loss	259	chr13	157900973	158150529	249556	loss
CNVR92	13	172288990	172299433	10443	gain	261	chr13	171983777	172299433	315656	gain
CNVR94	13	182315832	183107823	791991	gain	263	chr13	179392747	184454161	5061414	both
CNVR95	13	183694816	184695146	1000330	gain
CNVR97	13	186636192	187048388	412196	gain	264	chr13	186455702	188223724	1768022	gain
CNVR98	13	187647598	187926555	278957	gain
CNVR99	13	188485623	190407651	1922028	both	265	chr13	188290690	190042931	1752241	both
						266	chr13	190321524	190742109	420585	gain
CNVR101	13	191660790	192272753	611963	gain	267	chr13	191245245	191811364	566119	gain
CNVR103	13	194748204	195122760	374556	gain	268	chr13	192899793	205311058	12411265	both
CNVR104	13	195638599	197656323	2017724	both
CNVR105	13	198165206	199196126	1030920	gain
CNVR106	13	199308789	202728252	3419463	gain
CNVR107	13	203080799	205804998	2724199	gain
CNVR108	13	206171736	206389163	217427	gain	269	chr13	206171736	208316160	2144424	gain
CNVR109	13	206600113	207108562	508449	gain
CNVR110	13	207771914	208077029	305115	gain
CNVR111	13	209155239	212757383	3602144	both	270	chr13	209095174	213229007	4133833	both
CNVR113	13	213691291	214465106	773815	gain	271	chr13	213691291	216171353	2480062	gain
CNVR114	13	215504606	215828463	323857	gain
CNVR119	14	63336064	63401735	65671	gain	282	chr14	62586189	63842519	1256330	loss
CNVR122	14	73600295	73755058	154763	loss	284	chr14	73559713	76660742	3101029	both
CNVR133	15	93240320	93316570	76250	gain	310	chr15	93240320	93316570	76250	gain
CNVR138	16	44362264	44429692	67428	loss	324	chr16	44390463	44429692	39229	loss
CNVR139	16	71439338	71638433	199095	gain	327	chr16	71531492	71676371	144879	loss
CNVR142	17	15175	249970	234795	gain	330	chr17	15175	439303	424128	gain
CNVR146	18	23727309	23813414	86105	loss	342	chr18	23727309	23866133	138824	loss
CNVR147	18	29295240	29348051	52811	loss	344	chr18	28845095	29348051	502956	loss
Table F-5. Comparison with A. I. Fernandez., et al.(2014)
Our results						other study's results
CNVR ID	Chr.	CNVR Start	CNVR End	Length(Kb)	Type	CNVR ID	Chr.	CNVR Start	CNVR End	Length(Kb)	Type
CNVR8	1	192734647	192978414	243767	both	4	1	192637720	192978414	340694	both
CNVR12	1	284443528	284486575	43047	gain	5	1	278639334	278658095	18761	both
CNVR13	1	294821198	294867674	46476	gain	6	1	294847563	294890555	42992	gain
CNVR14	1	295241692	295462741	221049	gain	7	1	295241692	295462741	221049	both
CNVR41	4	27041022	27197523	156501	both	12	4	26902594	27197523	294929	both
CNVR51	6	27402328	27581833	179505	loss	19	6	23747642	23785023	37381	gain
CNVR58	7	133427075	133522529	95454	gain	27	7	133400942	133461877	60935	loss
CNVR79	11	70685626	71912745	1227119	both	35	11	70656747	71089190	432443	both
CNVR106	13	199308789	202728252	3419463	gain	43	13	200401307	200623145	221838	loss
CNVR112	13	213446014	213545042	99028	loss	44	13	213446014	213545042	99028	both
Table F-6. Comparison with G. Schiavo., et al.(2014)
Our results						other study's results
CNVR ID	Chr.	CNVR Start	CNVR End	Length(Kb)	Type	CNVR ID	Chr.	CNVR Start	CNVR End	Length(Kb)	Type
CNVR6	1	99692675	100080552	387877	GAIN	6	chr1	99869938	100080552	210614	loss
CNVR8	1	192734647	192978414	243767	both	2	chr1	192637720	193093994	456274	loss
CNVR12	1	284443528	284486575	43047	gain	4	chr1	284443528	284486575	43047	gain
CNVR20	2	15202906	15501488	298582	gain	10	chr2	15119750	15540036	420286	gain
CNVR44	5	21238084	21339891	101807	gain	13	chr5	21238084	21339891	101807	gain/loss
CNVR54	7	25215084	26187687	972603	both	19	chr7	25773312	26018707	245395	gain/loss
CNVR58	7	133427075	133522529	95454	gain	18	chr7	133400942	133487315	86373	gain
CNVR60	8	43462399	43878303	415904	gain	24	chr8	43651639	43878303	226664	gain
CNVR79	11	70685626	71912745	1227119	both	49	chr11	70656747	70967934	311187	loss
CNVR86	13	115174088	115189564	15476	loss	71	chr13	114482305	115237462	755157	loss
CNVR87	13	122236226	122297535	61309	loss	73	chr13	121795919	122568223	772304	loss
CNVR94	13	182315832	183107823	791991	gain	90	chr13	183032765	183254699	221934	loss
CNVR123	14	89402153	89494786	92633	loss	124	chr14	89402153	89670530	268377	loss
CNVR135	16	17875575	18134235	258660	loss	152	chr16	17297501	18134235	836734	loss
Table F-7. Comparison with K. Dong., et al.(2015)
Our results						other study's results
CNVR ID	Chr.	CNVR Start	CNVR End	Length(Kb)	Type	CNVR ID	Chr.	CNVR Start	CNVR End	Length(Kb)	Type
CNVR4	1	67370311	67458584	88273	loss	CNVR#1	1	67370311	67458584	88274	loss
CNVR6	1	99692675	100080552	387877	GAIN	CNVR#3	1	99869938	99989884	119947	loss
CNVR9	1	193873995	194258004	384009	loss	CNVR#6	1	193873995	194236881	362887	loss
CNVR12	1	284443528	284486575	43047	gain	CNVR#7	1	284443528	284486575	43048	both
CNVR13	1	294821198	294867674	46476	gain	CNVR#8	1	294821198	295462741	641544	gain
CNVR14	1	295241692	295462741	221049	gain
CNVR15	1	296616443	296747604	131161	loss	CNVR#10	1	296240370	296747604	507235	gain
CNVR17	1	311929352	312829468	900116	both	CNVR#11	1	312227906	312613914	386009	both
CNVR18	1	313111618	313480723	369105	both	CNVR#12	1	313111618	313480723	369106	loss
CNVR20	2	15202906	15501488	298582	gain	CNVR#13	2	15416695	15501488	84794	gain
CNVR29	2	160400099	160455016	54917	loss	CNVR#22	2	160400099	160455016	54918	loss
CNVR33	3	17349049	17405985	56936	loss	CNVR#24	3	17401867	17428593	26727	gain
CNVR35	3	64807120	65138723	331603	loss	CNVR#25	3	64807120	65138723	331604	loss
CNVR41	4	27041022	27197523	156501	both	CNVR#28	4	27041022	27197523	156502	loss
CNVR43	5	3813901	3844970	31069	gain	CNVR#31	5	3813901	3844970	31070	gain
CNVR44	5	21238084	21339891	101807	gain	CNVR#32	5	21238084	21339891	101808	gain
CNVR50	6	13731502	13812780	81278	gain	CNVR#38	6	13767703	13812780	45078	gain
CNVR54	7	25215084	26187687	972603	both	CNVR#44	7	25773312	26187687	414376	both
CNVR61	8	114392956	114436979	44023	loss	CNVR#51	8	114392956	114436979	44024	loss
CNVR66	9	3598721	3721967	123246	gain	CNVR#53	9	3598721	3721967	123247	gain
CNVR71	10	5471679	5608014	136335	both	CNVR#55	10	5471679	5502952	31274	gain
CNVR79	11	70685626	71912745	1227119	both	CNVR#64	11	70384747	71641281	1256535	gain
						CNVR#65	11	71882063	71912745	30683	gain
CNVR82	12	50892615	50930355	37740	gain	CNVR#68	12	50892615	50930355	37741	gain
CNVR90	13	158026997	158150530	123533	loss	CNVR#73	13	158099578	158150530	50952	loss
CNVR91	13	170612751	170944031	331280	gain	CNVR#74	13	170612751	170944031	331280	gain
CNVR96	13	185233204	185935406	702202	gain	CNVR#76	13	184921505	185685655	764150	loss
CNVR104	13	195638599	197656323	2017724	both	CNVR#77	13	195695080	195762111	67031	gain
CNVR111	13	209155239	212757383	3602144	both	CNVR#78	13	212546237	212714937	168700	loss
CNVR112	13	213446014	213545042	99028	loss	CNVR#79	13	213445963	213557881	111918	loss
CNVR116	14	3815879	3862162	46283	loss	CNVR#82	14	3815879	3862162	46283	loss
CNVR119	14	63336064	63401735	65671	gain	CNVR#83	14	63336064	63414448	78384	gain
CNVR122	14	73600295	73755058	154763	loss	CNVR#84	14	72881125	75632971	2751846	l
CNVR131	15	31495864	31561161	65297	gain	CNVR#89	15	31495864	31561161	65297	gain
CNVR133	15	93240320	93316570	76250	gain	CNVR#91	15	93181852	93316570	134718	l
CNVR137	16	29016623	29058649	42026	gain	CNVR#95	16	29016623	29058649	42026	gain
CNVR138	16	44362264	44429692	67428	loss	CNVR#97	16	44390463	44429692	39229	l
CNVR141	16	83735464	83806833	71369	gain	CNVR#98	16	83735464	83806833	71369	gain
CNVR147	18	29295240	29348051	52811	loss	CNVR#104	18	29295240	29348051	52811	l
CNVR149	18	53956586	54010221	53635	loss	CNVR#105	18	53956586	54011221	54635	l

## Sheet: Table G
Table G. Special CNVRs and gene information in this study compare with other studies
CNVR ID	CNVR Start	CNVR End	Chr.	Ensembl Gene ID	Ensembl Transcript ID	Gene Start (bp)	Gene End (bp)	Associated Gene Name	Gene Biotype	Strand
CNVR1	28640879	28753934	1	ENSSSCG00000004146	ENSSSCT00000036391	28642044	28700509	REPS1	protein_coding	1
CNVR1	28640879	28753934	1	ENSSSCG00000004147	ENSSSCT00000004583	28702732	28766662	ECT2L	protein_coding	-1
CNVR5	75540483	75602201	1	ENSSSCG00000004356	ENSSSCT00000004813	75563707	75582520	MCHR2	protein_coding	-1
CNVR11	275605644	275747658	1	ENSSSCG00000005418	ENSSSCT00000005961	275640598	275641551		protein_coding	1
CNVR11	275605644	275747658	1	ENSSSCG00000026241	ENSSSCT00000027959	275665250	275666206		protein_coding	1
CNVR11	275605644	275747658	1	ENSSSCG00000027930	ENSSSCT00000029721	275675622	275676578		protein_coding	1
CNVR11	275605644	275747658	1	ENSSSCG00000022665	ENSSSCT00000024293	275688299	275689252		protein_coding	1
CNVR11	275605644	275747658	1	ENSSSCG00000005423	ENSSSCT00000005966	275740052	275862912		protein_coding	-1
CNVR19	13853695	14043003	2	ENSSSCG00000029871	ENSSSCT00000028224	13856717	13858593		protein_coding	1
CNVR19	13853695	14043003	2	ENSSSCG00000013192	ENSSSCT00000014412	13866053	13866997		protein_coding	1
CNVR19	13853695	14043003	2	ENSSSCG00000013193	ENSSSCT00000014413	13884511	13885461		protein_coding	1
CNVR19	13853695	14043003	2	ENSSSCG00000013201	ENSSSCT00000014421	14030126	14031853	OR9G4	protein_coding	1
CNVR19	13853695	14043003	2	ENSSSCG00000013200	ENSSSCT00000014420	14034262	14035197		protein_coding	-1
CNVR30	5713062	5763996	3	ENSSSCG00000007603	ENSSSCT00000008343	5732132	5740519	NPTX2	protein_coding	1
CNVR42	39998067	40125899	4	ENSSSCG00000006070	ENSSSCT00000006661	39990794	40005773	COX6C	protein_coding	1
CNVR42	39998067	40125899	4	ENSSSCG00000006071	ENSSSCT00000006662	40006392	40202274		protein_coding	-1
CNVR48	11229081	11401849	6	ENSSSCG00000021551	ENSSSCT00000032493	11143433	11358986		protein_coding	-1
CNVR53	7022961	7187201	7	ENSSSCG00000001035	ENSSSCT00000001128	7035743	7056186	OFCC1	protein_coding	-1
CNVR56	108475290	108526629	7	ENSSSCG00000028718	ENSSSCT00000031767	108478261	108652250		protein_coding	1
CNVR57	120515238	120550319	7	ENSSSCG00000002450	ENSSSCT00000002720	120438867	120614498	SLC24A4	protein_coding	1
CNVR59	133594228	133701066	7	ENSSSCG00000002614	ENSSSCT00000002901	133596076	133597074		protein_coding	-1
CNVR59	133594228	133701066	7	ENSSSCG00000002608	ENSSSCT00000002895	133606548	133607528		protein_coding	1
CNVR59	133594228	133701066	7	ENSSSCG00000026858	ENSSSCT00000028620	133631246	133632184		protein_coding	1
CNVR59	133594228	133701066	7	ENSSSCG00000002605	ENSSSCT00000002892	133649436	133650347		protein_coding	1
CNVR59	133594228	133701066	7	ENSSSCG00000002607	ENSSSCT00000002894	133675434	133677361		protein_coding	1
CNVR59	133594228	133701066	7	ENSSSCG00000021993	ENSSSCT00000023615	133681954	133682901		protein_coding	-1
CNVR59	133594228	133701066	7	ENSSSCG00000025366	ENSSSCT00000029222	133687829	133689938		protein_coding	1
CNVR62	121639240	121712755	8	ENSSSCG00000009145	ENSSSCT00000010014	121674959	121686198	OSTC	protein_coding	-1
CNVR62	121639240	121712755	8	ENSSSCG00000009146	ENSSSCT00000010015	121707345	121711622	RPL34	protein_coding	-1
CNVR62	121639240	121712755	8	ENSSSCG00000019109	ENSSSCT00000020704	121660638	121660771	U11	snRNA	-1
CNVR73	26022684	26120414	10	ENSSSCG00000010905	ENSSSCT00000011932	26048270	26071954	ATP6V1G3	protein_coding	-1
CNVR88	139917496	140107787	13	ENSSSCG00000026260	ENSSSCT00000031000	139829967	139925608	ATP13A5	protein_coding	-1
CNVR88	139917496	140107787	13	ENSSSCG00000011821	ENSSSCT00000012933	139962874	140121941		protein_coding	-1
CNVR88	139917496	140107787	13	ENSSSCG00000025546	ENSSSCT00000025821	140000239	140072309		protein_coding	1
CNVR89	140124343	140205546	13	ENSSSCG00000011822	ENSSSCT00000012934	140194249	140230347	OPA1	protein_coding	1
CNVR91	170612751	170944031	13	ENSSSCG00000026824	ENSSSCT00000025409	170644340	170645266		protein_coding	-1
CNVR93	178290661	178443013	13	ENSSSCG00000011995	ENSSSCT00000013124	178437354	178438181		protein_coding	-1
CNVR100	190593689	190969594	13	ENSSSCG00000024623	ENSSSCT00000022689	190890292	191009147	USP25	protein_coding	1
CNVR115	216399345	217027218	13	ENSSSCG00000030016	ENSSSCT00000025792	216378408	216449518	PDE9A	protein_coding	1
CNVR115	216399345	217027218	13	ENSSSCG00000022246	ENSSSCT00000023021	216984861	216994632	ICOSLG	protein_coding	-1
CNVR115	216399345	217027218	13	ENSSSCG00000028741	ENSSSCT00000029563	216997925	217011817		protein_coding	-1
CNVR115	216399345	217027218	13	ENSSSCG00000023078	ENSSSCT00000023709	216486411	216506233	WDR4	protein_coding	-1
CNVR115	216399345	217027218	13	ENSSSCG00000026075	ENSSSCT00000025612	216486799	216493312		protein_coding	1
CNVR115	216399345	217027218	13	ENSSSCG00000025997	ENSSSCT00000028961	216523110	216528836		protein_coding	1
CNVR115	216399345	217027218	13	ENSSSCG00000021991	ENSSSCT00000025887	216572830	216576892		protein_coding	-1
CNVR115	216399345	217027218	13	ENSSSCG00000021698	ENSSSCT00000028037	216628848	216647523	RRP1B	protein_coding	-1
CNVR115	216399345	217027218	13	ENSSSCG00000022164	ENSSSCT00000025735	216653114	216696962	HSF2BP	protein_coding	1
CNVR115	216399345	217027218	13	ENSSSCG00000028137	ENSSSCT00000031598	216759345	216764050		protein_coding	1
CNVR115	216399345	217027218	13	ENSSSCG00000029627	ENSSSCT00000028839	216898157	216908948		protein_coding	1
CNVR115	216399345	217027218	13	ENSSSCG00000025525	ENSSSCT00000025442	216919296	216928632		protein_coding	1
CNVR115	216399345	217027218	13	ENSSSCG00000027940	ENSSSCT00000029732	216650134	216650250	SNORA70	snoRNA	-1
CNVR118	59846756	59957359	14	ENSSSCG00000010152	ENSSSCT00000011116	59855558	59856037	GNG4	protein_coding	-1
CNVR118	59846756	59957359	14	ENSSSCG00000010153	ENSSSCT00000011117	59874800	59894035	B3GALNT2	protein_coding	1
CNVR118	59846756	59957359	14	ENSSSCG00000010154	ENSSSCT00000011118	59954696	59969076	TBCE	protein_coding	-1
CNVR120	69219662	69274225	14	ENSSSCG00000010213	ENSSSCT00000011179	69255561	69256325	PSMA5	protein_coding	-1
CNVR120	69219662	69274225	14	ENSSSCG00000010214	ENSSSCT00000011180	69262319	69277262	CDC2	protein_coding	1
CNVR125	140328757	140360858	14	ENSSSCG00000010676	ENSSSCT00000011677	140327293	140346983		protein_coding	1
CNVR126	146585571	146637257	14	ENSSSCG00000010740	ENSSSCT00000011752	146602222	146617391	TEX36	protein_coding	-1
CNVR134	139192454	139219567	15	ENSSSCG00000016233	ENSSSCT00000017676	139183910	139249592	PN-1	protein_coding	-1
CNVR136	18897025	18930723	16	ENSSSCG00000030991	ENSSSCT00000036642	18897676	19288560	PDZD2	processed_transcript	1
CNVR145	58450650	58531296	17	ENSSSCG00000030760	ENSSSCT00000033200	58503994	58516526	CH242-7P5.3	antisense	1
CNVR145	58450650	58531296	17	ENSSSCG00000007469	ENSSSCT00000033093	58355133	58474149	PTPN1	protein_coding	1
CNVR145	58450650	58531296	17	ENSSSCG00000007470	ENSSSCT00000026410	58476081	58509813	FAM65C	protein_coding	-1
CNVR148	42108500	42219500	18	ENSSSCG00000027389	ENSSSCT00000024969	42190501	42212634		protein_coding	1
CNVR152	8672519	8718698	X	ENSSSCG00000012112	ENSSSCT00000035895	8472834	9213814	ARHGAP6	protein_coding	-1
CNVR152	8672519	8718698	X	ENSSSCG00000012113	ENSSSCT00000013250	8669937	8677620	AMELX	protein_coding	1
CNVR155	27092597	28389686	X	ENSSSCG00000030086	ENSSSCT00000029399	27254911	27350586		protein_coding	-1
CNVR155	27092597	28389686	X	ENSSSCG00000028114	ENSSSCT00000024861	27279599	27282366		protein_coding	1
CNVR155	27092597	28389686	X	ENSSSCG00000021452	ENSSSCT00000031948	27486717	27489484		protein_coding	-1
CNVR155	27092597	28389686	X	ENSSSCG00000012196	ENSSSCT00000013341	28024042	28068942	IL1RAPL1	protein_coding	1
CNVR155	27092597	28389686	X	ENSSSCG00000012197	ENSSSCT00000013342	28294877	28295911		protein_coding	1
CNVR155	27092597	28389686	X	ENSSSCG00000012198	ENSSSCT00000013343	28320171	28321211	MAGEB3	protein_coding	1
CNVR155	27092597	28389686	X	ENSSSCG00000028214	ENSSSCT00000030002	28341520	28342557		protein_coding	1
CNVR155	27092597	28389686	X	ENSSSCG00000012199	ENSSSCT00000013344	28384122	28389200	DAX-1	protein_coding	-1
CNVR155	27092597	28389686	X	ENSSSCG00000024730	ENSSSCT00000026433	28193680	28193743		miRNA	1
CNVR156	30562520	30747961	X	ENSSSCG00000028148	ENSSSCT00000029079	29401752	31958390	DMD	protein_coding	-1
CNVR157	32076524	34472337	X	ENSSSCG00000031029	ENSSSCT00000034813	32223757	32224877	CH242-130J23.1	pseudogene	1
CNVR157	32076524	34472337	X	ENSSSCG00000012212	ENSSSCT00000013358	33719139	33719787	CH242-117I7.1	pseudogene	1
CNVR157	32076524	34472337	X	ENSSSCG00000012213	ENSSSCT00000028420	33725851	33729226	CH242-117I7.3	pseudogene	1
CNVR157	32076524	34472337	X	ENSSSCG00000031062	ENSSSCT00000035886	33806824	33807999	CH242-117I7.2	pseudogene	1
CNVR157	32076524	34472337	X	ENSSSCG00000030837	ENSSSCT00000036456	33824222	33824950	CH242-117I7.4	pseudogene	-1
CNVR157	32076524	34472337	X	ENSSSCG00000030979	ENSSSCT00000034278	34028817	34029871	CH242-88A7.1	pseudogene	-1
CNVR157	32076524	34472337	X	ENSSSCG00000012215	ENSSSCT00000013361	34070551	34072289	CH242-88A7.2	pseudogene	-1
CNVR157	32076524	34472337	X	ENSSSCG00000030863	ENSSSCT00000034798	34372802	34373110	CH242-57E23.2	pseudogene	1
CNVR157	32076524	34472337	X	ENSSSCG00000024132	ENSSSCT00000023522	33945786	33976585	TMEM47	protein_coding	-1
CNVR157	32076524	34472337	X	ENSSSCG00000012216	ENSSSCT00000013362	34366878	34370540	CH242-57E23.1	protein_coding	1
CNVR158	46683760	46763140	X	ENSSSCG00000030912	ENSSSCT00000034666	46709253	46709481	PigE-4L18.6	pseudogene	1
CNVR158	46683760	46763140	X	ENSSSCG00000012272	ENSSSCT00000013420	46689868	46703702	ZNF157	protein_coding	-1
CNVR158	46683760	46763140	X	ENSSSCG00000012273	ENSSSCT00000033556	46746252	46760931	USP11	protein_coding	-1
CNVR159	47951941	48308192	X	ENSSSCG00000030753	ENSSSCT00000036516	47990465	47992389	CH242-247J8.3	non_coding	-1
CNVR159	47951941	48308192	X	ENSSSCG00000012298	ENSSSCT00000035358	48099241	48131997	CACNA1F	processed_transcript	-1
CNVR159	47951941	48308192	X	ENSSSCG00000012294	ENSSSCT00000032932	48063314	48066260	PLP2	protein_coding	1
CNVR159	47951941	48308192	X	ENSSSCG00000012293	ENSSSCT00000013442	48066375	48078264	PRICKLE3	protein_coding	-1
CNVR159	47951941	48308192	X	ENSSSCG00000012292	ENSSSCT00000034645	48080132	48094633	SYP	protein_coding	-1
CNVR159	47951941	48308192	X	ENSSSCG00000012297	ENSSSCT00000035107	48133200	48151807	CCDC22	protein_coding	1
CNVR159	47951941	48308192	X	ENSSSCG00000012300	ENSSSCT00000013449	48151826	48170815	FOXP3	protein_coding	-1
CNVR159	47951941	48308192	X	ENSSSCG00000022584	ENSSSCT00000035921	48175749	48192437	PPP1R3F	protein_coding	1
CNVR159	47951941	48308192	X	ENSSSCG00000028340	ENSSSCT00000029010	48208003	48221079		protein_coding	1
CNVR159	47951941	48308192	X	ENSSSCG00000012287	ENSSSCT00000035448	47948307	47964288	TFE3	protein_coding	-1
CNVR159	47951941	48308192	X	ENSSSCG00000012288	ENSSSCT00000013437	47976918	47994738	CCDC120	protein_coding	1
CNVR159	47951941	48308192	X	ENSSSCG00000012289	ENSSSCT00000035198	47995413	47998350	PRAF2	protein_coding	-1
CNVR159	47951941	48308192	X	ENSSSCG00000030995	ENSSSCT00000032822	47995680	47999858	CH242-247J8.11	protein_coding	-1
CNVR159	47951941	48308192	X	ENSSSCG00000012290	ENSSSCT00000036201	47998631	48004136	WDR45	protein_coding	-1
CNVR159	47951941	48308192	X	ENSSSCG00000012291	ENSSSCT00000013440	48024601	48039758	GPKOW	protein_coding	-1
CNVR159	47951941	48308192	X	ENSSSCG00000012295	ENSSSCT00000035012	48055004	48059583	MAGIX	protein_coding	1
CNVR160	52288809	55073511	X	ENSSSCG00000030919	ENSSSCT00000033525	52525974	52686212	FAM120C	processed_transcript	-1
CNVR160	52288809	55073511	X	ENSSSCG00000029757	ENSSSCT00000025577	53143460	53144390	CH242-193E13.5	pseudogene	-1
CNVR160	52288809	55073511	X	ENSSSCG00000030925	ENSSSCT00000034340	53168498	53170103	CH242-193E13.1	pseudogene	1
CNVR160	52288809	55073511	X	ENSSSCG00000031007	ENSSSCT00000032663	53227520	53228321	CH242-193E13.3	pseudogene	-1
CNVR160	52288809	55073511	X	ENSSSCG00000031045	ENSSSCT00000034711	54080960	54081698	CH242-152I6.3	pseudogene	-1
CNVR160	52288809	55073511	X	ENSSSCG00000030964	ENSSSCT00000034360	54310032	54310458	CH242-152I6.4	pseudogene	1
CNVR160	52288809	55073511	X	ENSSSCG00000012346	ENSSSCT00000013501	53852224	53856059	PAGE2B	protein_coding	1
CNVR160	52288809	55073511	X	ENSSSCG00000012349	ENSSSCT00000034835	54046888	54049941	USP51	protein_coding	1
CNVR160	52288809	55073511	X	ENSSSCG00000012350	ENSSSCT00000013505	54057688	54059104	MAGEH1	protein_coding	-1
CNVR160	52288809	55073511	X	ENSSSCG00000029800	ENSSSCT00000027537	54154920	54165935		protein_coding	-1
CNVR160	52288809	55073511	X	ENSSSCG00000024025	ENSSSCT00000031732	54221716	54232414		protein_coding	1
CNVR160	52288809	55073511	X	ENSSSCG00000020805	ENSSSCT00000022426	54301872	54302819	FOXR2	protein_coding	-1
CNVR160	52288809	55073511	X	ENSSSCG00000027095	ENSSSCT00000030414	54490994	54501938		protein_coding	-1
CNVR160	52288809	55073511	X	ENSSSCG00000024842	ENSSSCT00000024645	54556410	54567130		protein_coding	1
CNVR160	52288809	55073511	X	ENSSSCG00000012352	ENSSSCT00000013507	54906627	54926706	KLF8	protein_coding	-1
CNVR160	52288809	55073511	X	ENSSSCG00000012329	ENSSSCT00000013482	52130285	52306498	PHF8	protein_coding	-1
CNVR160	52288809	55073511	X	ENSSSCG00000021316	ENSSSCT00000013484	52471202	52471465		protein_coding	1
CNVR160	52288809	55073511	X	ENSSSCG00000012330	ENSSSCT00000013483	52506475	52688855	FAM120C	protein_coding	-1
CNVR160	52288809	55073511	X	ENSSSCG00000012332	ENSSSCT00000013486	52778883	52912100	WNK3	protein_coding	-1
CNVR160	52288809	55073511	X	ENSSSCG00000012334	ENSSSCT00000013488	53043934	53049407	TSR2	protein_coding	1
CNVR160	52288809	55073511	X	ENSSSCG00000012335	ENSSSCT00000034095	53049373	53088165	FGD1	protein_coding	-1
CNVR160	52288809	55073511	X	ENSSSCG00000012336	ENSSSCT00000013490	53113293	53141323	GNL3L	protein_coding	1
CNVR160	52288809	55073511	X	ENSSSCG00000012342	ENSSSCT00000013496	53361029	53369059	MAGED2	protein_coding	1
CNVR160	52288809	55073511	X	ENSSSCG00000023152	ENSSSCT00000024233	53415578	53416953		protein_coding	-1
CNVR160	52288809	55073511	X	ENSSSCG00000012344	ENSSSCT00000013498	53537798	53539564	TROP	protein_coding	-1
CNVR160	52288809	55073511	X	ENSSSCG00000028313	ENSSSCT00000031235	53542554	53543284		protein_coding	-1
CNVR160	52288809	55073511	X	ENSSSCG00000024234	ENSSSCT00000030685	53545287	53545955		protein_coding	-1
CNVR160	52288809	55073511	X	ENSSSCG00000024814	ENSSSCT00000026514	53702921	53708132	TROP	protein_coding	1
CNVR160	52288809	55073511	X	ENSSSCG00000012345	ENSSSCT00000034212	53709533	53795125	PFKFB1	protein_coding	-1
CNVR160	52288809	55073511	X	ENSSSCG00000012348	ENSSSCT00000035798	53798837	53806711	APEX2	protein_coding	1
CNVR160	52288809	55073511	X	ENSSSCG00000012347	ENSSSCT00000032826	53807665	53832133	ALAS2	protein_coding	-1
CNVR160	52288809	55073511	X	ENSSSCG00000020264	ENSSSCT00000021859	52308260	52308360	U6	snRNA	1
CNVR160	52288809	55073511	X	ENSSSCG00000027316	ENSSSCT00000029074	53881538	53881644	U6	snRNA	1
CNVR160	52288809	55073511	X	ENSSSCG00000018326	ENSSSCT00000019921	53367512	53367639	SNORA11	snoRNA	1
CNVR160	52288809	55073511	X	ENSSSCG00000023634	ENSSSCT00000019741	53004613	53004719	U6	snRNA	-1
CNVR160	52288809	55073511	X	ENSSSCG00000020461	ENSSSCT00000022056	54752511	54752651	SNORA74	snoRNA	-1
CNVR160	52288809	55073511	X	ENSSSCG00000024469	ENSSSCT00000021064	53540863	53540991	SNORA11	snoRNA	-1
CNVR160	52288809	55073511	X	ENSSSCG00000019302	ENSSSCT00000020897	53763251	53763348	U6	snRNA	1
CNVR160	52288809	55073511	X	ENSSSCG00000025158	ENSSSCT00000021583	53704534	53704662	SNORA11	snoRNA	1
CNVR161	57672454	62086511	X	ENSSSCG00000030887	ENSSSCT00000032941	61053045	61053192	CH242-257M5.2	pseudogene	-1
CNVR161	57672454	62086511	X	ENSSSCG00000027657	ENSSSCT00000032193	57673576	57710448	ZC4H2	protein_coding	-1
CNVR161	57672454	62086511	X	ENSSSCG00000012367	ENSSSCT00000013524	58099720	58368203	ZC3H12B	protein_coding	1
CNVR161	57672454	62086511	X	ENSSSCG00000012366	ENSSSCT00000013523	58376615	58402428	LAS1L	protein_coding	-1
CNVR161	57672454	62086511	X	ENSSSCG00000012365	ENSSSCT00000013522	58473229	58596671	MSN	protein_coding	1
CNVR161	57672454	62086511	X	ENSSSCG00000028241	ENSSSCT00000027782	58756065	58763172	VSIG4	protein_coding	-1
CNVR161	57672454	62086511	X	ENSSSCG00000012364	ENSSSCT00000013521	58774511	58776353	VSIG4	protein_coding	1
CNVR161	57672454	62086511	X	ENSSSCG00000012363	ENSSSCT00000013520	58894678	58976654	HEPH	protein_coding	1
CNVR161	57672454	62086511	X	ENSSSCG00000026683	ENSSSCT00000028435	59064360	59065250		protein_coding	-1
CNVR161	57672454	62086511	X	ENSSSCG00000012371	ENSSSCT00000013528	60313335	60504856	AR	protein_coding	1
CNVR161	57672454	62086511	X	ENSSSCG00000025348	ENSSSCT00000025057	60818903	60915170		protein_coding	-1
CNVR161	57672454	62086511	X	ENSSSCG00000022676	ENSSSCT00000030679	61016381	61097867	OPHN1	protein_coding	-1
CNVR161	57672454	62086511	X	ENSSSCG00000012829	ENSSSCT00000014023	61532033	61553611		protein_coding	1
CNVR161	57672454	62086511	X	ENSSSCG00000012830	ENSSSCT00000014024	61682350	61683308		protein_coding	1
CNVR161	57672454	62086511	X	ENSSSCG00000028336	ENSSSCT00000030519	61698893	61724778		protein_coding	1
CNVR161	57672454	62086511	X	ENSSSCG00000012828	ENSSSCT00000014022	61990606	61996411	STARD8	protein_coding	1
CNVR161	57672454	62086511	X	ENSSSCG00000020253	ENSSSCT00000021848	58890681	58890789	U6	snRNA	-1
CNVR161	57672454	62086511	X	ENSSSCG00000020233	ENSSSCT00000021828	58982608	58982789	7SK	misc_RNA	1
CNVR161	57672454	62086511	X	ENSSSCG00000021167	ENSSSCT00000022778	57894191	57894318	SNORD22	snoRNA	1
CNVR161	57672454	62086511	X	ENSSSCG00000019401	ENSSSCT00000020996	58752406	58752517		miRNA	1
CNVR162	64571859	64882657	X	ENSSSCG00000030982	ENSSSCT00000035210	64590993	64591292	CH242-6A14.7	pseudogene	-1
CNVR162	64571859	64882657	X	ENSSSCG00000012392	ENSSSCT00000036403	64781424	64782000	CH242-239N4.3	pseudogene	-1
CNVR162	64571859	64882657	X	ENSSSCG00000030944	ENSSSCT00000034262	64829323	64829830	CH242-239N4.4	pseudogene	1
CNVR162	64571859	64882657	X	ENSSSCG00000031020	ENSSSCT00000036256	64855955	64856384	CH242-239N4.2	pseudogene	1
CNVR162	64571859	64882657	X	ENSSSCG00000012400	ENSSSCT00000036115	64630298	64639396	SNX12	protein_coding	-1
CNVR162	64571859	64882657	X	ENSSSCG00000012399	ENSSSCT00000036657	64662674	64670530	FOXO4	protein_coding	1
CNVR162	64571859	64882657	X	ENSSSCG00000030796	ENSSSCT00000033334	64670990	64673296	CXorf65	protein_coding	-1
CNVR162	64571859	64882657	X	ENSSSCG00000012397	ENSSSCT00000033439	64673721	64677978	IL2RG	protein_coding	-1
CNVR162	64571859	64882657	X	ENSSSCG00000012396	ENSSSCT00000013554	64681019	64704523	MED12	protein_coding	1
CNVR162	64571859	64882657	X	ENSSSCG00000012395	ENSSSCT00000013553	64706246	64727650		protein_coding	1
CNVR162	64571859	64882657	X	ENSSSCG00000024163	ENSSSCT00000027814	64829676	64832213	ZMYM3	protein_coding	1
CNVR162	64571859	64882657	X	ENSSSCG00000012394	ENSSSCT00000032791	64844646	64852108	GJB1	protein_coding	-1
CNVR162	64571859	64882657	X	ENSSSCG00000028532	ENSSSCT00000030328	64703549	64703668		miRNA	1
CNVR163	67528213	75703473	X	ENSSSCG00000012427	ENSSSCT00000013588	69086891	69087469		pseudogene	-1
CNVR163	67528213	75703473	X	ENSSSCG00000012431	ENSSSCT00000013592	69595718	69596455		pseudogene	-1
CNVR163	67528213	75703473	X	ENSSSCG00000030914	ENSSSCT00000035944	69773656	69775159	CH242-22N6.1	pseudogene	1
CNVR163	67528213	75703473	X	ENSSSCG00000030773	ENSSSCT00000035999	70391449	70474604	CH242-77E21.3	non_coding	1
CNVR163	67528213	75703473	X	ENSSSCG00000030886	ENSSSCT00000035765	71041112	71041421	CH242-477H4.2	pseudogene	-1
CNVR163	67528213	75703473	X	ENSSSCG00000030774	ENSSSCT00000035231	71058228	71058564	CH242-477H4.3	pseudogene	1
CNVR163	67528213	75703473	X	ENSSSCG00000012441	ENSSSCT00000013606	71092369	71094028		pseudogene	1
CNVR163	67528213	75703473	X	ENSSSCG00000030832	ENSSSCT00000032680	71200453	71200993	CH242-173B9.3	pseudogene	1
CNVR163	67528213	75703473	X	ENSSSCG00000030852	ENSSSCT00000035447	71263446	71266898	CH242-173B9.4	pseudogene	1
CNVR163	67528213	75703473	X	ENSSSCG00000030968	ENSSSCT00000033847	71287598	71288870	CH242-173B9.5	pseudogene	-1
CNVR163	67528213	75703473	X	ENSSSCG00000024448	ENSSSCT00000029536	71813713	71816052	CH242-52A15.2	pseudogene	-1
CNVR163	67528213	75703473	X	ENSSSCG00000030981	ENSSSCT00000032909	72818864	72819473	CH242-14J15.1	pseudogene	-1
CNVR163	67528213	75703473	X	ENSSSCG00000031044	ENSSSCT00000033627	73384765	73385115	CH242-247O11.2	pseudogene	-1
CNVR163	67528213	75703473	X	ENSSSCG00000025156	ENSSSCT00000031239	73863914	74026485	CH242-123K13.1	pseudogene	-1
CNVR163	67528213	75703473	X	ENSSSCG00000030851	ENSSSCT00000033769	74066972	74069705	CH242-238J6.1	pseudogene	-1
CNVR163	67528213	75703473	X	ENSSSCG00000031063	ENSSSCT00000033022	74377847	74379106	CH242-270H1.2	pseudogene	-1
CNVR163	67528213	75703473	X	ENSSSCG00000020977	ENSSSCT00000031317	74389847	74404857	SH3BGRL	processed_transcript	-1
CNVR163	67528213	75703473	X	ENSSSCG00000030956	ENSSSCT00000034501	75597653	75599872	CH242-228F19.1	pseudogene	1
CNVR163	67528213	75703473	X	ENSSSCG00000012449	ENSSSCT00000034804	73272832	73280739		protein_coding	1
CNVR163	67528213	75703473	X	ENSSSCG00000012450	ENSSSCT00000013616	73814259	73815431	FAM46D	protein_coding	-1
CNVR163	67528213	75703473	X	ENSSSCG00000012425	ENSSSCT00000033503	68687968	68709137	UPRT	protein_coding	1
CNVR163	67528213	75703473	X	ENSSSCG00000012452	ENSSSCT00000013618	74225141	74239655	SH3BGRL	protein_coding	-1
CNVR163	67528213	75703473	X	ENSSSCG00000012426	ENSSSCT00000013587	68882475	69045188	ZDHHC15	protein_coding	-1
CNVR163	67528213	75703473	X	ENSSSCG00000012430	ENSSSCT00000013591	69272221	69273417		protein_coding	-1
CNVR163	67528213	75703473	X	ENSSSCG00000030577	ENSSSCT00000031316	69304924	69317294	PBDC1	protein_coding	-1
CNVR163	67528213	75703473	X	ENSSSCG00000021054	ENSSSCT00000027012	70165759	70173292		protein_coding	1
CNVR163	67528213	75703473	X	ENSSSCG00000029017	ENSSSCT00000031834	70196287	70204685		protein_coding	-1
CNVR163	67528213	75703473	X	ENSSSCG00000022833	ENSSSCT00000030963	70359020	70368401	FGF16	protein_coding	1
CNVR163	67528213	75703473	X	ENSSSCG00000012434	ENSSSCT00000013595	70390623	70790550		protein_coding	-1
CNVR163	67528213	75703473	X	ENSSSCG00000012433	ENSSSCT00000013594	70617251	70625651		protein_coding	1
CNVR163	67528213	75703473	X	ENSSSCG00000012435	ENSSSCT00000013598	70812442	70877254	MAGT1	protein_coding	-1
CNVR163	67528213	75703473	X	ENSSSCG00000030970	ENSSSCT00000035991	70881166	70887766	COX7B	protein_coding	1
CNVR163	67528213	75703473	X	ENSSSCG00000012437	ENSSSCT00000013601	70943081	71025990	ATP7A	protein_coding	1
CNVR163	67528213	75703473	X	ENSSSCG00000012439	ENSSSCT00000013603	71117451	71117970		protein_coding	1
CNVR163	67528213	75703473	X	ENSSSCG00000026714	ENSSSCT00000023290	71321308	71342676	TAF9B	protein_coding	1
CNVR163	67528213	75703473	X	ENSSSCG00000012440	ENSSSCT00000013604	71339754	71352751	PGK1	protein_coding	-1
CNVR163	67528213	75703473	X	ENSSSCG00000012443	ENSSSCT00000013608	71481819	71482841	CYSLTR1	protein_coding	-1
CNVR163	67528213	75703473	X	ENSSSCG00000012445	ENSSSCT00000013611	71950225	71962479	LPAR4	protein_coding	1
CNVR163	67528213	75703473	X	ENSSSCG00000012446	ENSSSCT00000033817	72343324	72359036	P2Y10	protein_coding	1
CNVR163	67528213	75703473	X	ENSSSCG00000030020	ENSSSCT00000031915	72545720	72546721		protein_coding	1
CNVR163	67528213	75703473	X	ENSSSCG00000021734	ENSSSCT00000023362	72635874	72638570	GPR174	protein_coding	-1
CNVR163	67528213	75703473	X	ENSSSCG00000012448	ENSSSCT00000013614	72699045	72706320	ITM2A	protein_coding	-1
CNVR163	67528213	75703473	X	ENSSSCG00000029458	ENSSSCT00000030528	67805548	67819648		protein_coding	1
CNVR163	67528213	75703473	X	ENSSSCG00000012419	ENSSSCT00000013579	67853611	67878794		protein_coding	-1
CNVR163	67528213	75703473	X	ENSSSCG00000020747	ENSSSCT00000024196	68034926	68049020		protein_coding	1
CNVR163	67528213	75703473	X	ENSSSCG00000028538	ENSSSCT00000030994	68080063	68108403		protein_coding	-1
CNVR163	67528213	75703473	X	ENSSSCG00000021754	ENSSSCT00000030966	68161941	68168038		protein_coding	-1
CNVR163	67528213	75703473	X	ENSSSCG00000025929	ENSSSCT00000013584	68180431	68186528		protein_coding	-1
CNVR163	67528213	75703473	X	ENSSSCG00000012424	ENSSSCT00000032985	68396333	68522004	ABCB7	protein_coding	-1
CNVR163	67528213	75703473	X	ENSSSCG00000021589	ENSSSCT00000023227	75425132	75425389	7SK	misc_RNA	-1
CNVR163	67528213	75703473	X	ENSSSCG00000026464	ENSSSCT00000019985	69436727	69436820	ssc-mir-325	miRNA	1
CNVR163	67528213	75703473	X	ENSSSCG00000026245	ENSSSCT00000020781	69673008	69673101	ssc-mir-325	miRNA	-1
CNVR163	67528213	75703473	X	ENSSSCG00000024178	ENSSSCT00000025822	73458415	73458521	U6	snRNA	-1
CNVR163	67528213	75703473	X	ENSSSCG00000022100	ENSSSCT00000023716	74030029	74030135	U6	snRNA	-1
CNVR163	67528213	75703473	X	ENSSSCG00000018719	ENSSSCT00000020314	67530361	67530440	ssc-mir-374a	miRNA	-1
CNVR163	67528213	75703473	X	ENSSSCG00000025552	ENSSSCT00000027253	73248297	73248403	U6	snRNA	1
CNVR163	67528213	75703473	X	ENSSSCG00000030499	ENSSSCT00000032371	68294301	68294390		miRNA	1
CNVR163	67528213	75703473	X	ENSSSCG00000018346	ENSSSCT00000019941	69515826	69515913		miRNA	1
CNVR163	67528213	75703473	X	ENSSSCG00000019673	ENSSSCT00000021268	67530183	67530288	ssc-mir-545	miRNA	-1
CNVR164	78000797	84984929	X	ENSSSCG00000030962	ENSSSCT00000033706	78698220	78698679	CH242-250A21.1	pseudogene	-1
CNVR164	78000797	84984929	X	ENSSSCG00000031015	ENSSSCT00000034485	78754236	78756373	CH242-33O21.2	lincRNA	-1
CNVR164	78000797	84984929	X	ENSSSCG00000030794	ENSSSCT00000034187	79961475	79963380	CH242-91O1.2	pseudogene	1
CNVR164	78000797	84984929	X	ENSSSCG00000030807	ENSSSCT00000032719	80786415	80787258	CH242-289H11.1	pseudogene	1
CNVR164	78000797	84984929	X	ENSSSCG00000030895	ENSSSCT00000035828	81222066	81223908	CH242-157F23.1	pseudogene	-1
CNVR164	78000797	84984929	X	ENSSSCG00000030734	ENSSSCT00000033342	81465744	81466835	CH242-151C9.2	pseudogene	-1
CNVR164	78000797	84984929	X	ENSSSCG00000031043	ENSSSCT00000034546	81868745	81869741	CH242-208M4.1	pseudogene	1
CNVR164	78000797	84984929	X	ENSSSCG00000012470	ENSSSCT00000013637	82616706	82617024	CH242-247N16.2	pseudogene	1
CNVR164	78000797	84984929	X	ENSSSCG00000031016	ENSSSCT00000036067	82673797	82674052	CH242-247N16.1	pseudogene	-1
CNVR164	78000797	84984929	X	ENSSSCG00000030946	ENSSSCT00000034231	83124849	83126058	CH242-112O1.1	pseudogene	1
CNVR164	78000797	84984929	X	ENSSSCG00000027260	ENSSSCT00000026737	83277438	83279004		pseudogene	1
CNVR164	78000797	84984929	X	ENSSSCG00000029112	ENSSSCT00000027829	83502960	83504526		pseudogene	1
CNVR164	78000797	84984929	X	ENSSSCG00000030980	ENSSSCT00000036166	83543676	83544153	CH242-184K14.2	pseudogene	-1
CNVR164	78000797	84984929	X	ENSSSCG00000030891	ENSSSCT00000032702	84298975	84299941	CH242-132M16.1	pseudogene	1
CNVR164	78000797	84984929	X	ENSSSCG00000012473	ENSSSCT00000013640	84451270	84452448	CH242-320P11.1	pseudogene	1
CNVR164	78000797	84984929	X	ENSSSCG00000012459	ENSSSCT00000013625	78031562	78104740	APOOL	protein_coding	1
CNVR164	78000797	84984929	X	ENSSSCG00000023546	ENSSSCT00000029661	78195596	78244129		protein_coding	1
CNVR164	78000797	84984929	X	ENSSSCG00000024291	ENSSSCT00000025018	78284663	78301669	APOOL	protein_coding	1
CNVR164	78000797	84984929	X	ENSSSCG00000021601	ENSSSCT00000025975	78308051	78323748	ZNF711	protein_coding	1
CNVR164	78000797	84984929	X	ENSSSCG00000012462	ENSSSCT00000013628	78329158	78402682	POF1B	protein_coding	-1
CNVR164	78000797	84984929	X	ENSSSCG00000012463	ENSSSCT00000013630	78754167	79243045	CHM	protein_coding	-1
CNVR164	78000797	84984929	X	ENSSSCG00000021256	ENSSSCT00000013632	80592289	80592691		protein_coding	1
CNVR164	78000797	84984929	X	ENSSSCG00000029941	ENSSSCT00000017102	80723794	80724196		protein_coding	-1
CNVR164	78000797	84984929	X	ENSSSCG00000012467	ENSSSCT00000013634	80884837	81001424	KLHL4	protein_coding	1
CNVR164	78000797	84984929	X	ENSSSCG00000012469	ENSSSCT00000013636	81530173	81530616		protein_coding	1
CNVR164	78000797	84984929	X	ENSSSCG00000012471	ENSSSCT00000013638	83504659	83504931		protein_coding	1
CNVR164	78000797	84984929	X	ENSSSCG00000019895	ENSSSCT00000021490	78804780	78804859	ssc-mir-361	miRNA	-1
CNVR164	78000797	84984929	X	ENSSSCG00000021788	ENSSSCT00000023413	84969193	84969299	U6	snRNA	1
CNVR164	78000797	84984929	X	ENSSSCG00000020102	ENSSSCT00000021697	79781400	79781507	U6	snRNA	-1
CNVR165	86201492	86419002	X	ENSSSCG00000030869	ENSSSCT00000035686	86397408	86397744	CH242-210O13.1	pseudogene	1
CNVR165	86201492	86419002	X	ENSSSCG00000012474	ENSSSCT00000013641	85891071	86317742	DIAPH2	protein_coding	1
CNVR165	86201492	86419002	X	ENSSSCG00000027552	ENSSSCT00000028335	86412496	86693109		protein_coding	1
CNVR167	108647614	109121920	X	ENSSSCG00000012595	ENSSSCT00000028402	109048854	109122133	LRCH2	protein_coding	-1
CNVR167	108647614	109121920	X	ENSSSCG00000012593	ENSSSCT00000013772	108566657	108871722	HTR2C	protein_coding	1
CNVR167	108647614	109121920	X	ENSSSCG00000012594	ENSSSCT00000013773	108965153	109001627	IL13RA2	protein_coding	-1
CNVR167	108647614	109121920	X	ENSSSCG00000018716	ENSSSCT00000020311	109065243	109065372	SNORA35	snoRNA	-1
CNVR167	108647614	109121920	X	ENSSSCG00000018127	ENSSSCT00000019722	108710169	108710248		miRNA	1
CNVR167	108647614	109121920	X	ENSSSCG00000023815	ENSSSCT00000025448	108648718	108648824	U6	snRNA	1
CNVR167	108647614	109121920	X	ENSSSCG00000019551	ENSSSCT00000021146	108806659	108806769		miRNA	1
CNVR167	108647614	109121920	X	ENSSSCG00000018193	ENSSSCT00000019788	108691599	108691709		miRNA	1
CNVR168	110165834	110208364	X	ENSSSCG00000027730	ENSSSCT00000029504	110181771	110181877	U6	snRNA	1
CNVR169	117574951	118990898	X	ENSSSCG00000030723	ENSSSCT00000034702	117647425	117647578	CH242-229D21.1	pseudogene	1
CNVR169	117574951	118990898	X	ENSSSCG00000030841	ENSSSCT00000034036	118951380	118951838	CH242-520N23.1	pseudogene	-1
CNVR169	117574951	118990898	X	ENSSSCG00000012645	ENSSSCT00000013826	118321510	118323181	DCAF12L2	protein_coding	-1
CNVR169	117574951	118990898	X	ENSSSCG00000012647	ENSSSCT00000013828	118823787	118825784	PRR32	protein_coding	1
CNVR169	117574951	118990898	X	ENSSSCG00000020431	ENSSSCT00000022026	117608200	117608279	ssc-mir-2483	miRNA	-1
CNVR169	117574951	118990898	X	ENSSSCG00000027661	ENSSSCT00000029424	118352120	118352206		miRNA	-1
CNVR169	117574951	118990898	X	ENSSSCG00000020408	ENSSSCT00000022003	117837872	117837956		miRNA	-1
CNVR170	119762138	121399063	X	ENSSSCG00000001541	ENSSSCT00000001717	119935171	119937924	CH242-3L20.1	pseudogene	1
CNVR170	119762138	121399063	X	ENSSSCG00000030779	ENSSSCT00000035700	120308031	120308964	CH242-196N11.2	pseudogene	-1
CNVR170	119762138	121399063	X	ENSSSCG00000012648	ENSSSCT00000013829	120283685	120285088	ACTRT1	protein_coding	-1
CNVR172	141433236	142000976	X	ENSSSCG00000012759	ENSSSCT00000013949	141414894	141458759		protein_coding	1
CNVR172	141433236	142000976	X	ENSSSCG00000012761	ENSSSCT00000013951	141485376	141495524		protein_coding	1
CNVR172	141433236	142000976	X	ENSSSCG00000012762	ENSSSCT00000013952	141515518	141516801		protein_coding	1
CNVR172	141433236	142000976	X	ENSSSCG00000026657	ENSSSCT00000027243	141526031	141536696		protein_coding	-1
CNVR172	141433236	142000976	X	ENSSSCG00000030075	ENSSSCT00000022521	141587591	141589396		protein_coding	1
CNVR172	141433236	142000976	X	ENSSSCG00000021789	ENSSSCT00000023721	141624353	141625836	ZNF275	protein_coding	-1
CNVR172	141433236	142000976	X	ENSSSCG00000012768	ENSSSCT00000013958	141779330	141787155	ZFP92	protein_coding	1
CNVR172	141433236	142000976	X	ENSSSCG00000022182	ENSSSCT00000029755	141798113	141799723	TREX2	protein_coding	-1
CNVR172	141433236	142000976	X	ENSSSCG00000012767	ENSSSCT00000013957	141801422	141821573	HAUS7	protein_coding	-1
CNVR172	141433236	142000976	X	ENSSSCG00000012766	ENSSSCT00000013956	141845599	141858874	BGN	protein_coding	1
CNVR172	141433236	142000976	X	ENSSSCG00000012769	ENSSSCT00000013959	141883400	141921127	ATP2B3	protein_coding	1
CNVR172	141433236	142000976	X	ENSSSCG00000012774	ENSSSCT00000013966	141968377	141977757	DUSP9	processed_transcript	1
CNVR172	141433236	142000976	X	ENSSSCG00000012770	ENSSSCT00000034383	141924441	141933321	FAM58A	protein_coding	-1
CNVR172	141433236	142000976	X	ENSSSCG00000012773	ENSSSCT00000013965	141989366	141993498	PNCK	protein_coding	-1

## Sheet: Table H
Table H. Information of CNVRs in different populations
CNVRs detected only in large litter size Xiang pigs							CNVRs detected only in small litter size Xiang pigs							CNVRs detected only in Kele pigs
CNVR ID	Chr.	CNVR Start	CNVR End	Length	Type	Sample ID	CNVR ID	Chr.	CNVR Start	CNVR End	Length	Type	Sample ID	CNVR ID	Chr.	CNVR Start	CNVR End	Length	Type	Sample ID
CNVR1	1	28640879	28753934	113055	loss	g1x65	CNVR31	3	12159746	12206694	46948	loss	1X95	CNVR11	1	275605644	275747658	142014	loss	2P26
CNVR2	1	49439200	49492820	53620	loss	gg1x10	CNVR35	3	64807120	65138723	331603	loss	1X132	CNVR13	1	294821198	294867674	46476	gain	2P15F1
CNVR3	1	54752505	54824153	71648	loss	g1x66	CNVR37	3	129847043	130036775	189732	gain	1X59	CNVR15	1	296616443	296747604	131161	loss	2P28
CNVR4	1	67370311	67458584	88273	loss	g1x66	CNVR48	6	11229081	11401849	172768	loss	1X138	CNVR19	2	13853695	14043003	189308	gain	2P14，2P15F1，2P18
CNVR5	1	75540483	75602201	61718	loss	1x156,1x159	CNVR49	6	11649072	11746847	97775	gain	1X23	CNVR20	2	15202906	15501488	298582	gain	2P32
CNVR9	1	193873995	194258004	384009	loss	1X115,1X113,1x119,1x158	CNVR56	7	108475290	108526629	51339	gain	1X170	CNVR21	2	21834717	21891536	56819	loss	2P18
CNVR10	1	268547138	268597486	50348	gain	1X139	CNVR69	9	148655056	148691522	36466	gain	1X173	CNVR27	2	125940877	126022431	81554	loss	2P02
CNVR12	1	284443528	284486575	43047	gain	1X67,1X106F1	CNVR72	10	6286761	6341853	55092	loss	1X135	CNVR30	3	5713062	5763996	50934	gain	2P33，2P11
CNVR22	2	24340490	24536667	196177	loss	1x07，1x08F1，1X115	CNVR86	13	115174088	115189564	15476	loss	1X142	CNVR42	4	39998067	40125899	127832	loss	2P02
CNVR25	2	38279249	38614109	334860	gain	1X65，1x81	CNVR118	14	59846756	59957359	110603	gain	1X59	CNVR46	5	27258927	27814032	555105	loss	2P15F1，2P01，2P11，2P24，2P19
CNVR29	2	160400099	160455016	54917	loss	1X102，1x103	CNVR127	14	147744084	147788275	44191	gain	1X149	CNVR57	7	120515238	120550319	35081	gain	2P02
CNVR32	3	16913373	16920601	7228	loss	1X66，1x82，1x103，1X13，1X83，1X31	CNVR144	17	37623168	37652474	29306	gain	1X170	CNVR68	9	125100668	125316966	216298	gain	2P08
CNVR33	3	17349049	17405985	56936	loss	1x82	CNVR151	17	62012263	62050089	37826	GAIN	1X59	CNVR74	10	52025204	52249156	223952	loss	2P18，2P24
CNVR34	3	51429976	51508856	78880	gain	1X155								CNVR77	11	64362716	64368094	5378	loss	2P24
CNVR36	3	94216284	94536421	320137	loss	1X155								CNVR81	12	15826689	15883731	57042	gain	2P15F1
CNVR39	4	5693803	5931042	237239	loss	1x156，1x157，1X76，1X167，1X166，1X102，1X104，1x80，1X84，1X90								CNVR87	13	122236226	122297535	61309	loss	2P35
CNVR41	4	27041022	27197523	156501	both	1x161，1X11								CNVR90	13	158026997	158150530	123533	loss	2P18
CNVR44	5	21238084	21339891	101807	gain	1X155								CNVR112	13	213446014	213545042	99028	loss	2P34，2P35
CNVR47	5	39588852	39799087	210235	gain	1X11								CNVR117	14	29093013	29160467	67454	gain	2P02
CNVR51	6	27402328	27581833	179505	loss	1X113								CNVR119	14	63336064	63401735	65671	gain	2P14
CNVR52	7	1532038	1681623	149585	loss	1x116								CNVR120	14	69219662	69274225	54563	gain	2P02
CNVR55	7	81790769	82096915	306146	loss	1X12								CNVR126	14	146585571	146637257	51686	gain	2P30
CNVR61	8	114392956	114436979	44023	loss	1X84								CNVR128	14	151919690	151959968	40278	gain	2P14
CNVR62	8	121639240	121712755	73515	gain	1X115								CNVR130	15	13314232	13371964	57732	gain	2P33
CNVR63	8	124128258	124138493	10235	gain	1X134，1x98								CNVR132	15	53632632	53688960	56328	gain	2P24
CNVR64	8	132945670	133158855	213185	loss	1x158，1X106F1，1X65，1x105F1								CNVR136	16	18897025	18930723	33698	gain	2P30
CNVR65	8	142733110	142758274	25164	loss	1x160								CNVR138	16	44362264	44429692	67428	loss	2P15F1
CNVR67	9	4297475	4336627	39152	gain	1X51								CNVR140	16	79872744	80020682	147938	loss	2P18
CNVR70	9	148997109	149000304	3195	gain	1X87F1								CNVR141	16	83735464	83806833	71369	gain	2P35
CNVR73	10	26022684	26120414	97730	loss	1X115								CNVR148	18	42108500	42219500	111000	loss	2P02
CNVR75	11	4870206	4959489	89283	gain	1x164
CNVR76	11	37260128	37328150	68022	loss	1X66
CNVR80	12	10698900	10854247	155347	loss	1X38
CNVR83	13	13172438	13338209	165771	gain	1x162
CNVR84	13	38657796	38691669	33873	loss	1X66
CNVR85	13	110509364	110802738	293374	gain	1X110
CNVR88	13	139917496	140107787	190291	loss	1X09F1
CNVR89	13	140124343	140205546	81203	gain	1X09F1
CNVR92	13	172288990	172299433	10443	gain	1X102，1x08F1
CNVR93	13	178290661	178443013	152352	gain	1x08F1
CNVR94	13	182315832	183107823	791991	gain	1x08F1
CNVR95	13	183694816	184695146	1000330	gain	1x08F1
CNVR96	13	185233204	185935406	702202	gain	1x08F1
CNVR97	13	186636192	187048388	412196	gain	1x08F1
CNVR98	13	187647598	187926555	278957	gain	1x08F1
CNVR99	13	188485623	190407651	1922028	both	1x08F1
CNVR100	13	190593689	190969594	375905	gain	1x08F1
CNVR101	13	191660790	192272753	611963	gain	1x08F1
CNVR102	13	192739452	194386412	1646960	gain	1x08F1
CNVR103	13	194748204	195122760	374556	gain	1x08F1
CNVR105	13	198165206	199196126	1030920	gain	1x08F1
CNVR106	13	199308789	202728252	3419463	gain	1x08F1
CNVR107	13	203080799	205804998	2724199	gain	1x08F1，1X09F1
CNVR109	13	206600113	207108562	508449	gain	1x08F1
CNVR110	13	207771914	208077029	305115	gain	1x08F1
CNVR113	13	213691291	214465106	773815	gain	1x08F1
CNVR114	13	215504606	215828463	323857	gain	1x08F1
CNVR115	13	216399345	217027218	627873	gain	1x08F1
CNVR116	14	3815879	3862162	46283	loss	1X113
CNVR122	14	73600295	73755058	154763	loss	1x161
CNVR123	14	89402153	89494786	92633	loss	1X10
CNVR124	14	130817022	130865038	48016	loss	1x116
CNVR125	14	140328757	140360858	32101	loss	1x72F2，1X68
CNVR129	15	7444538	7497409	52871	loss	1X166
CNVR131	15	31495864	31561161	65297	gain	1X68
CNVR134	15	139192454	139219567	27113	gain	1X29
CNVR135	16	17875575	18134235	258660	loss	1X67
CNVR139	16	71439338	71638433	199095	gain	1X83
CNVR146	18	23727309	23813414	86105	loss	1X10
CNVR149	18	53956586	54010221	53635	loss	1x161
CNVR155	X	27092597	28389686	1297089	gain	1X18，1x103
CNVR156	X	30562520	30747961	185441	gain	1X10
CNVR157	X	32076524	34472337	2395813	gain	1X10
CNVR158	X	46683760	46763140	79380	gain	1X10
CNVR160	X	52288809	55073511	2784702	gain	1X104，1X38，1X166
CNVR161	X	57672454	62086511	4414057	gain	1X10
CNVR162	X	64571859	64882657	310798	gain	1X87F1，1X10，1X167
CNVR163	X	67528213	75703473	8175260	gain	1X09F1，1X68，1X87F1，1X10，1X166
CNVR165	X	86201492	86419002	217510	gain	1X10
CNVR168	X	110165834	110208364	42530	loss	1X29
CNVR169	X	117574951	118990898	1415947	gain	1X10
CNVR172	X	141433236	142000976	567740	gain	1x82，1x159

## Sheet: Table I
Table I. Information of genes in the CNVRs of Kele pig
Chr.	Ensembl Gene ID	Associated Gene Name	Gene Start (bp)	Gene End (bp)	Gene Biotype	Strand	Category	Term	Count	%	PValue	Genes	List Total	Pop Hits	Pop Total	Fold Enrichment	Bonferroni	Benjamini	FDR
1	ENSSSCG00000005418		275640598	275641551	protein_coding	1	GOTERM_BP_FAT	GO:0007608~sensory perception of smell	9	37.5	7.25671e-09	ENSG00000197233, ENSG00000172208, ENSG00000181935, ENSG00000136839, ENSG00000171496, ENSG00000176555, ENSG00000172457, ENSG00000175619, ENSG00000176567	19	292	11100	18.0065	2.39471e-06	2.39471e-06	9.83799e-06
1	ENSSSCG00000026241		275665250	275666206	protein_coding	1	GOTERM_BP_FAT	GO:0007606~sensory perception of chemical stimulus	9	37.5	1.4168e-08	ENSG00000197233, ENSG00000172208, ENSG00000181935, ENSG00000136839, ENSG00000171496, ENSG00000176555, ENSG00000172457, ENSG00000175619, ENSG00000176567	19	318	11100	16.5343	4.67544e-06	2.33772e-06	1.92077e-05
1	ENSSSCG00000027930		275675622	275676578	protein_coding	1	GOTERM_BP_FAT	GO:0007186~G-protein coupled receptor protein signaling pathway	11	45.8333	1.24611e-07	ENSG00000163485, ENSG00000197233, ENSG00000172208, ENSG00000165029, ENSG00000181935, ENSG00000136839, ENSG00000171496, ENSG00000176555, ENSG00000172457, ENSG00000175619, ENSG00000176567	19	826	11100	7.78004	4.11209e-05	1.37072e-05	0.000168937
1	ENSSSCG00000022665		275688299	275689252	protein_coding	1	GOTERM_BP_FAT	GO:0050877~neurological system process	11	45.8333	4.34615e-07	ENSG00000163485, ENSG00000106236, ENSG00000197233, ENSG00000172208, ENSG00000181935, ENSG00000136839, ENSG00000171496, ENSG00000176555, ENSG00000172457, ENSG00000175619, ENSG00000176567	19	943	11100	6.81476	0.000143413	3.58551e-05	0.00058921
1	ENSSSCG00000005423		275740052	275862912	protein_coding	-1	GOTERM_BP_FAT	GO:0007600~sensory perception	9	37.5	1.59238e-06	ENSG00000197233, ENSG00000172208, ENSG00000181935, ENSG00000136839, ENSG00000171496, ENSG00000176555, ENSG00000172457, ENSG00000175619, ENSG00000176567	19	587	11100	8.95723	0.000525348	0.000105092	0.00215879
1	ENSSSCG00000028903		294845761	294846711	protein_coding	-1	GOTERM_BP_FAT	GO:0050890~cognition	9	37.5	4.60107e-06	ENSG00000197233, ENSG00000172208, ENSG00000181935, ENSG00000136839, ENSG00000171496, ENSG00000176555, ENSG00000172457, ENSG00000175619, ENSG00000176567	19	676	11100	7.77795	0.0015172	0.000253027	0.00623754
1	ENSSSCG00000005536		294857189	294858127	protein_coding	-1	GOTERM_BP_FAT	GO:0007166~cell surface receptor linked signal transduction	11	45.8333	2.48385e-05	ENSG00000163485, ENSG00000197233, ENSG00000172208, ENSG00000165029, ENSG00000181935, ENSG00000136839, ENSG00000171496, ENSG00000176555, ENSG00000172457, ENSG00000175619, ENSG00000176567	19	1465	11100	4.38656	0.00816332	0.00117029	0.0336686
1	ENSSSCG00000024893	OR1J2	296616432	296617370	protein_coding	1	GOTERM_BP_FAT	GO:0031401~positive regulation of protein modification process	3	12.5	0.0268446	ENSG00000170312, ENSG00000163485, ENSG00000143106	19	159	11100	11.0228	0.999874	0.674526	30.8512
1	ENSSSCG00000027081		296705379	296706323	protein_coding	1	GOTERM_BP_FAT	GO:0032270~positive regulation of cellular protein metabolic process	3	12.5	0.0405308	ENSG00000170312, ENSG00000163485, ENSG00000143106	19	199	11100	8.80719	0.999999	0.78065	42.932
13	ENSSSCG00000012071	IGSF5	213446785	213480182	protein_coding	-1	GOTERM_BP_FAT	GO:0051247~positive regulation of protein metabolic process	3	12.5	0.0435314	ENSG00000170312, ENSG00000163485, ENSG00000143106	19	207	11100	8.46682	1	0.769785	45.3046
13	ENSSSCG00000025939		158098388	158099183	pseudogene	1	GOTERM_BP_FAT	GO:0031399~regulation of protein modification process	3	12.5	0.0658166	ENSG00000170312, ENSG00000163485, ENSG00000143106	19	261	11100	6.71506	1	0.870293	60.2675
14	ENSSSCG00000010170	DISC1	63329745	63441058	protein_coding	-1	GOTERM_BP_FAT	GO:0006909~phagocytosis	2	8.33333	0.0690485	ENSG00000163485, ENSG00000165029	19	44	11100	26.555	1	0.860204	62.0911
14	ENSSSCG00000010740	TEX36	146602222	146617391	protein_coding	-1	GOTERM_BP_FAT	GO:0031145~anaphase-promoting complex-dependent proteasomal ubiquitin-dependent protein catabolic process	2	8.33333	0.0900568	ENSG00000170312, ENSG00000143106	19	58	11100	20.1452	1	0.908884	72.1803
14	ENSSSCG00000010213	PSMA5	69255561	69256325	protein_coding	-1	GOTERM_BP_FAT	GO:0051437~positive regulation of ubiquitin-protein ligase activity during mitotic cell cycle	2	8.33333	0.0930212	ENSG00000170312, ENSG00000143106	19	60	11100	19.4737	1	0.899884	73.3842
14	ENSSSCG00000010214	CDC2	69262319	69277262	protein_coding	1	GOTERM_BP_FAT	GO:0051443~positive regulation of ubiquitin-protein ligase activity	2	8.33333	0.0959765	ENSG00000170312, ENSG00000143106	19	62	11100	18.8455	1	0.891369	74.5361
16	ENSSSCG00000030991	PDZD2	18897676	19288560	processed_transcript	1	GOTERM_BP_FAT	GO:0051439~regulation of ubiquitin-protein ligase activity during mitotic cell cycle	2	8.33333	0.0974507	ENSG00000170312, ENSG00000143106	19	63	11100	18.5464	1	0.879333	75.0934
16	ENSSSCG00000020281	RNaseP_nuc	44422852	44423217	misc_RNA	1	GOTERM_CC_FAT	GO:0016021~integral to membrane	16	66.6667	0.00201801	ENSG00000164919, ENSG00000163485, ENSG00000140090, ENSG00000122557, ENSG00000163444, ENSG00000181935, ENSG00000175619, ENSG00000183067, ENSG00000197233, ENSG00000172208, ENSG00000165029, ENSG00000136839, ENSG00000171496, ENSG00000172457, ENSG00000176555, ENSG00000176567	21	4263	10452	1.86803	0.145778	0.145778	2.1141
18	ENSSSCG00000027389		42190501	42212634	protein_coding	1	GOTERM_CC_FAT	GO:0031224~intrinsic to membrane	16	66.6667	0.00306123	ENSG00000164919, ENSG00000163485, ENSG00000140090, ENSG00000122557, ENSG00000163444, ENSG00000181935, ENSG00000175619, ENSG00000183067, ENSG00000197233, ENSG00000172208, ENSG00000165029, ENSG00000136839, ENSG00000171496, ENSG00000172457, ENSG00000176555, ENSG00000176567	21	4415	10452	1.80372	0.212697	0.112699	3.19105
2	ENSSSCG00000029871		13856717	13858593	protein_coding	1	GOTERM_CC_FAT	GO:0005886~plasma membrane	12	50	0.0162068	ENSG00000163485, ENSG00000197233, ENSG00000172208, ENSG00000165029, ENSG00000181935, ENSG00000136839, ENSG00000171496, ENSG00000176555, ENSG00000172457, ENSG00000175619, ENSG00000183067, ENSG00000176567	21	3115	10452	1.91736	0.720426	0.346119	15.8725
2	ENSSSCG00000013192		13866053	13866997	protein_coding	1	GOTERM_MF_FAT	GO:0004984~olfactory receptor activity	9	37.5	1.83107e-09	ENSG00000197233, ENSG00000172208, ENSG00000181935, ENSG00000136839, ENSG00000171496, ENSG00000176555, ENSG00000172457, ENSG00000175619, ENSG00000176567	17	273	10637	20.6277	1.35499e-07	1.35499e-07	1.91653e-06
2	ENSSSCG00000013193		13884511	13885461	protein_coding	1	KEGG_PATHWAY	hsa04740:Olfactory transduction	9	37.5	6.22053e-07	ENSG00000197233, ENSG00000172208, ENSG00000181935, ENSG00000136839, ENSG00000171496, ENSG00000176555, ENSG00000172457, ENSG00000175619, ENSG00000176567	15	286	4395	9.22028	9.9528e-06	9.9528e-06	0.00044174
2	ENSSSCG00000013201	OR9G4	14030126	14031853	protein_coding	1
2	ENSSSCG00000013200		14034262	14035197	protein_coding	-1
2	ENSSSCG00000026758		15205324	15206244	protein_coding	-1
2	ENSSSCG00000023843		15227115	15228041	protein_coding	-1
2	ENSSSCG00000029368		15248552	15249478	protein_coding	-1
2	ENSSSCG00000021107		15260455	15261384	protein_coding	-1
2	ENSSSCG00000014505		15272577	15273494	protein_coding	-1
2	ENSSSCG00000026901		15286972	15287901	protein_coding	-1
2	ENSSSCG00000023685		15292901	15293830	protein_coding	-1
2	ENSSSCG00000025683		15312617	15313546	protein_coding	-1
2	ENSSSCG00000014509		15331124	15332056	protein_coding	1
2	ENSSSCG00000021908		15369768	15370700	protein_coding	-1
2	ENSSSCG00000024703		15383646	15384545	protein_coding	-1
2	ENSSSCG00000027805		15400277	15401209	protein_coding	-1
2	ENSSSCG00000024280		15490567	15491496	protein_coding	-1
3	ENSSSCG00000007603	NPTX2	5732132	5740519	protein_coding	1
4	ENSSSCG00000006070	COX6C	39990794	40005773	protein_coding	1
4	ENSSSCG00000006071		40006392	40202274	protein_coding	-1
7	ENSSSCG00000002450	SLC24A4	120438867	120614498	protein_coding	1
9	ENSSSCG00000015473	TMEM183A	125173393	125186034	protein_coding	1
9	ENSSSCG00000015474		125188692	125235698	protein_coding	1
9	ENSSSCG00000015475	MYOG	125243803	125245882	protein_coding	-1
9	ENSSSCG00000021059	ADORA1	125294860	125334614	protein_coding	1

## Sheet: Table J
Table J. Information of genes in the CNVRs of large litter size Xiang pig
Chr.	Ensembl Gene ID	Associated Gene Name	Gene Start (bp)	Gene End (bp)	Gene Biotype	Strand	Category	Term	Count	%	PValue	Genes	List Total	Pop Hits	Pop Total	Fold Enrichment	Bonferroni	Benjamini	FDR
1	ENSSSCG00000004356	MCHR2	75563707	75582520	protein_coding	-1	GOTERM_BP_FAT	GO:0009152~purine ribonucleotide biosynthetic process	6	3.46821	0.00330658	ENSG00000154723, ENSG00000165240, ENSG00000187527, ENSG00000127249, ENSG00000159131, ENSG00000067842	116	97	11100	5.91895	0.968605	0.968605	5.12625
1	ENSSSCG00000005474		284447110	284451960	protein_coding	-1	GOTERM_BP_FAT	GO:0009260~ribonucleotide biosynthetic process	6	3.46821	0.00445674	ENSG00000154723, ENSG00000165240, ENSG00000187527, ENSG00000127249, ENSG00000159131, ENSG00000067842	116	104	11100	5.52056	0.990606	0.903078	6.85087
1	ENSSSCG00000005377		268374986	268740816	protein_coding	-1	GOTERM_BP_FAT	GO:0009150~purine ribonucleotide metabolic process	6	3.46821	0.00680124	ENSG00000154723, ENSG00000165240, ENSG00000187527, ENSG00000127249, ENSG00000159131, ENSG00000067842	116	115	11100	4.9925	0.999201	0.907189	10.2758
1	ENSSSCG00000004146	REPS1	28642044	28700509	protein_coding	1	GOTERM_BP_FAT	GO:0006754~ATP biosynthetic process	5	2.89017	0.00720862	ENSG00000154723, ENSG00000165240, ENSG00000187527, ENSG00000127249, ENSG00000067842	116	74	11100	6.46552	0.999479	0.848939	10.8587
1	ENSSSCG00000004147	ECT2L	28702732	28766662	protein_coding	-1	GOTERM_BP_FAT	GO:0009259~ribonucleotide metabolic process	6	3.46821	0.00927464	ENSG00000154723, ENSG00000165240, ENSG00000187527, ENSG00000127249, ENSG00000159131, ENSG00000067842	116	124	11100	4.63014	0.999941	0.857362	13.7609
10	ENSSSCG00000010905	ATP6V1G3	26048270	26071954	protein_coding	-1	GOTERM_BP_FAT	GO:0009206~purine ribonucleoside triphosphate biosynthetic process	5	2.89017	0.00945167	ENSG00000154723, ENSG00000165240, ENSG00000187527, ENSG00000127249, ENSG00000067842	116	80	11100	5.9806	0.999951	0.808716	14.0054
13	ENSSSCG00000012072	DSCAM	213656818	214029116	protein_coding	-1	GOTERM_BP_FAT	GO:0009145~purine nucleoside triphosphate biosynthetic process	5	2.89017	0.00986484	ENSG00000154723, ENSG00000165240, ENSG00000187527, ENSG00000127249, ENSG00000067842	116	81	11100	5.90677	0.999968	0.77236	14.5735
13	ENSSSCG00000022949		214134927	214142596	protein_coding	1	GOTERM_BP_FAT	GO:0009201~ribonucleoside triphosphate biosynthetic process	5	2.89017	0.00986484	ENSG00000154723, ENSG00000165240, ENSG00000187527, ENSG00000127249, ENSG00000067842	116	81	11100	5.90677	0.999968	0.77236	14.5735
13	ENSSSCG00000026260	ATP13A5	139829967	139925608	protein_coding	-1	GOTERM_BP_FAT	GO:0006164~purine nucleotide biosynthetic process	6	3.46821	0.00989852	ENSG00000154723, ENSG00000165240, ENSG00000187527, ENSG00000127249, ENSG00000159131, ENSG00000067842	116	126	11100	4.55665	0.999969	0.727314	14.6197
13	ENSSSCG00000011821		139962874	140121941	protein_coding	-1	GOTERM_BP_FAT	GO:0009142~nucleoside triphosphate biosynthetic process	5	2.89017	0.010726	ENSG00000154723, ENSG00000165240, ENSG00000187527, ENSG00000127249, ENSG00000067842	116	83	11100	5.76444	0.999987	0.714106	15.7464
13	ENSSSCG00000025546		140000239	140072309	protein_coding	1	GOTERM_BP_FAT	GO:0046034~ATP metabolic process	5	2.89017	0.0135963	ENSG00000154723, ENSG00000165240, ENSG00000187527, ENSG00000127249, ENSG00000067842	116	89	11100	5.37582	0.999999	0.760826	19.5476
13	ENSSSCG00000011822	OPA1	140194249	140230347	protein_coding	1	GOTERM_BP_FAT	GO:0008406~gonad development	5	2.89017	0.0181232	ENSG00000180530, ENSG00000142168, ENSG00000169083, ENSG00000169297, ENSG00000154734	116	97	11100	4.93246	1	0.82404	25.2177
13	ENSSSCG00000012084	PRDM15	215498995	215544157	protein_coding	-1	GOTERM_BP_FAT	GO:0009205~purine ribonucleoside triphosphate metabolic process	5	2.89017	0.0181232	ENSG00000154723, ENSG00000165240, ENSG00000187527, ENSG00000127249, ENSG00000067842	116	97	11100	4.93246	1	0.82404	25.2177
13	ENSSSCG00000025821	C2CD2	215572917	215639734	protein_coding	-1	GOTERM_BP_FAT	GO:0006873~cellular ion homeostasis	9	5.20231	0.0186207	ENSG00000142192, ENSG00000165240, ENSG00000171189, ENSG00000142168, ENSG00000131269, ENSG00000196338, ENSG00000158578, ENSG00000173198, ENSG00000180509	116	322	11100	2.67456	1	0.805405	25.8174
13	ENSSSCG00000011995		178437354	178438181	protein_coding	-1	GOTERM_BP_FAT	GO:0009199~ribonucleoside triphosphate metabolic process	5	2.89017	0.0187474	ENSG00000154723, ENSG00000165240, ENSG00000187527, ENSG00000127249, ENSG00000067842	116	98	11100	4.88213	1	0.781573	25.9694
13	ENSSSCG00000027786	ZBTB21	215675712	215688081	protein_coding	-1	GOTERM_BP_FAT	GO:0055082~cellular chemical homeostasis	9	5.20231	0.0205517	ENSG00000142192, ENSG00000165240, ENSG00000171189, ENSG00000142168, ENSG00000131269, ENSG00000196338, ENSG00000158578, ENSG00000173198, ENSG00000180509	116	328	11100	2.62563	1	0.787757	28.103
13	ENSSSCG00000022290	UMODL1	215760711	215826897	protein_coding	1	GOTERM_BP_FAT	GO:0009144~purine nucleoside triphosphate metabolic process	5	2.89017	0.0213767	ENSG00000154723, ENSG00000165240, ENSG00000187527, ENSG00000127249, ENSG00000067842	116	102	11100	4.69067	1	0.77807	29.0591
13	ENSSSCG00000029127		182833132	182834038	protein_coding	-1	GOTERM_BP_FAT	GO:0050772~positive regulation of axonogenesis	3	1.7341	0.0214731	ENSG00000169855, ENSG00000185008, ENSG00000156299	116	22	11100	13.0486	1	0.757739	29.1701
13	ENSSSCG00000022789		183834656	183877970	protein_coding	-1	GOTERM_BP_FAT	GO:0007610~behavior	10	5.78035	0.02295	ENSG00000169855, ENSG00000171587, ENSG00000142192, ENSG00000169306, ENSG00000165240, ENSG00000171189, ENSG00000142168, ENSG00000196338, ENSG00000173198, ENSG00000185008	116	400	11100	2.39224	1	0.760019	30.8497
13	ENSSSCG00000012000	GBE1	184018402	184112967	protein_coding	1	GOTERM_BP_FAT	GO:0009165~nucleotide biosynthetic process	6	3.46821	0.0246789	ENSG00000154723, ENSG00000165240, ENSG00000187527, ENSG00000127249, ENSG00000159131, ENSG00000067842	116	159	11100	3.61093	1	0.765599	32.7683
13	ENSSSCG00000029384		184210770	184232276	protein_coding	-1	GOTERM_BP_FAT	GO:0006163~purine nucleotide metabolic process	6	3.46821	0.025271	ENSG00000154723, ENSG00000165240, ENSG00000187527, ENSG00000127249, ENSG00000159131, ENSG00000067842	116	160	11100	3.58836	1	0.755312	33.4139
13	ENSSSCG00000012001	ROBO1	186520074	186882856	protein_coding	1	GOTERM_BP_FAT	GO:0009141~nucleoside triphosphate metabolic process	5	2.89017	0.0264993	ENSG00000154723, ENSG00000165240, ENSG00000187527, ENSG00000127249, ENSG00000067842	116	109	11100	4.38943	1	0.754207	34.7347
13	ENSSSCG00000012002	ROBO2	187691228	187851594	protein_coding	-1	GOTERM_BP_FAT	GO:0045137~development of primary sexual characteristics	5	2.89017	0.0272861	ENSG00000180530, ENSG00000142168, ENSG00000169083, ENSG00000169297, ENSG00000154734	116	110	11100	4.34953	1	0.747585	35.5678
13	ENSSSCG00000012004	LIPI	189333225	189357220	protein_coding	-1	GOTERM_BP_FAT	GO:0048608~reproductive structure development	5	2.89017	0.0272861	ENSG00000180530, ENSG00000142168, ENSG00000169083, ENSG00000169297, ENSG00000154734	116	110	11100	4.34953	1	0.747585	35.5678
13	ENSSSCG00000022325		189369705	189374147	protein_coding	1	GOTERM_BP_FAT	GO:0034404~nucleobase, nucleoside and nucleotide biosynthetic process	6	3.46821	0.0283687	ENSG00000154723, ENSG00000165240, ENSG00000187527, ENSG00000127249, ENSG00000159131, ENSG00000067842	116	165	11100	3.47962	1	0.745128	36.6976
13	ENSSSCG00000030016	PDE9A	216378408	216449518	protein_coding	1	GOTERM_BP_FAT	GO:0034654~nucleobase, nucleoside, nucleotide and nucleic acid biosynthetic process	6	3.46821	0.0283687	ENSG00000154723, ENSG00000165240, ENSG00000187527, ENSG00000127249, ENSG00000159131, ENSG00000067842	116	165	11100	3.47962	1	0.745128	36.6976
13	ENSSSCG00000012005		189375477	189379121	protein_coding	1	GOTERM_BP_FAT	GO:0032990~cell part morphogenesis	7	4.04624	0.0294111	ENSG00000169855, ENSG00000171587, ENSG00000142192, ENSG00000165240, ENSG00000198836, ENSG00000079482, ENSG00000185008	116	225	11100	2.97701	1	0.742396	37.7681
13	ENSSSCG00000012006		189414690	189546760	protein_coding	1	GOTERM_BP_FAT	GO:0006812~cation transport	11	6.35838	0.0295045	ENSG00000154723, ENSG00000165240, ENSG00000151418, ENSG00000187527, ENSG00000127249, ENSG00000159197, ENSG00000173198, ENSG00000140675, ENSG00000089472, ENSG00000180509, ENSG00000067842	116	487	11100	2.16137	1	0.728558	37.8632
13	ENSSSCG00000022246	ICOSLG	216984861	216994632	protein_coding	-1	GOTERM_BP_FAT	GO:0050801~ion homeostasis	9	5.20231	0.0301472	ENSG00000142192, ENSG00000165240, ENSG00000171189, ENSG00000142168, ENSG00000131269, ENSG00000196338, ENSG00000158578, ENSG00000173198, ENSG00000180509	116	353	11100	2.43968	1	0.721835	38.5139
13	ENSSSCG00000028741		216997925	217011817	protein_coding	-1	GOTERM_BP_FAT	GO:0006879~cellular iron ion homeostasis	3	1.7341	0.0315546	ENSG00000142168, ENSG00000131269, ENSG00000158578	116	27	11100	10.6322	1	0.724369	39.9162
13	ENSSSCG00000012007	HSPA13	189549389	189561047	protein_coding	-1	GOTERM_BP_FAT	GO:0007626~locomotory behavior	7	4.04624	0.0322577	ENSG00000169855, ENSG00000171587, ENSG00000142192, ENSG00000165240, ENSG00000142168, ENSG00000173198, ENSG00000185008	116	230	11100	2.91229	1	0.718908	40.6055
13	ENSSSCG00000023078	WDR4	216486411	216506233	protein_coding	-1	GOTERM_BP_FAT	GO:0055072~iron ion homeostasis	3	1.7341	0.0407032	ENSG00000142168, ENSG00000131269, ENSG00000158578	116	31	11100	9.26029	1	0.78794	48.3271
13	ENSSSCG00000012008	SAMSN1	189683758	189716074	protein_coding	-1	GOTERM_BP_FAT	GO:0051151~negative regulation of smooth muscle cell differentiation	2	1.15607	0.0408073	ENSG00000159200, ENSG00000184481	116	4	11100	47.8448	1	0.777163	48.4161
13	ENSSSCG00000012029	BACH1	203134183	203148106	protein_coding	1	GOTERM_BP_FAT	GO:0048667~cell morphogenesis involved in neuron differentiation	6	3.46821	0.0439541	ENSG00000169855, ENSG00000171587, ENSG00000142192, ENSG00000142168, ENSG00000079482, ENSG00000185008	116	186	11100	3.08676	1	0.791066	51.0402
13	ENSSSCG00000026075		216486799	216493312	protein_coding	1	GOTERM_BP_FAT	GO:0048812~neuron projection morphogenesis	6	3.46821	0.0465291	ENSG00000169855, ENSG00000171587, ENSG00000142192, ENSG00000165240, ENSG00000079482, ENSG00000185008	116	189	11100	3.03777	1	0.79934	53.0938
13	ENSSSCG00000025119	GRIK1	203411536	203632118	protein_coding	-1	GOTERM_BP_FAT	GO:0007548~sex differentiation	5	2.89017	0.0470586	ENSG00000180530, ENSG00000142168, ENSG00000169083, ENSG00000169297, ENSG00000154734	116	131	11100	3.65228	1	0.792804	53.506
13	ENSSSCG00000025997		216523110	216528836	protein_coding	1	GOTERM_BP_FAT	GO:0030521~androgen receptor signaling pathway	3	1.7341	0.0481372	ENSG00000184634, ENSG00000180530, ENSG00000169083	116	34	11100	8.4432	1	0.790337	54.3351
13	ENSSSCG00000021991		216572830	216576892	protein_coding	-1	GOTERM_BP_FAT	GO:0030005~cellular di-, tri-valent inorganic cation homeostasis	6	3.46821	0.0491925	ENSG00000142192, ENSG00000165240, ENSG00000142168, ENSG00000131269, ENSG00000158578, ENSG00000173198	116	192	11100	2.9903	1	0.787837	55.1329
13	ENSSSCG00000021038	NRIP1	190062821	190066291	protein_coding	-1	GOTERM_BP_FAT	GO:0030030~cell projection organization	8	4.62428	0.0511701	ENSG00000169855, ENSG00000171587, ENSG00000142192, ENSG00000165240, ENSG00000102302, ENSG00000142168, ENSG00000079482, ENSG00000185008	116	324	11100	2.36271	1	0.791594	56.5929
13	ENSSSCG00000024623	USP25	190890292	191009147	protein_coding	1	GOTERM_BP_FAT	GO:0007276~gamete generation	8	4.62428	0.0554337	ENSG00000160207, ENSG00000180530, ENSG00000147202, ENSG00000142168, ENSG00000142182, ENSG00000169297, ENSG00000154734, ENSG00000039600	116	330	11100	2.31975	1	0.808991	59.5904
13	ENSSSCG00000021698	RRP1B	216628848	216647523	protein_coding	-1	GOTERM_BP_FAT	GO:0019725~cellular homeostasis	9	5.20231	0.0577715	ENSG00000142192, ENSG00000165240, ENSG00000171189, ENSG00000142168, ENSG00000131269, ENSG00000196338, ENSG00000158578, ENSG00000173198, ENSG00000180509	116	403	11100	2.13699	1	0.813753	61.1505
13	ENSSSCG00000022164	HSF2BP	216653114	216696962	protein_coding	1	GOTERM_BP_FAT	GO:0055066~di-, tri-valent inorganic cation homeostasis	6	3.46821	0.0597178	ENSG00000142192, ENSG00000165240, ENSG00000142168, ENSG00000131269, ENSG00000158578, ENSG00000173198	116	203	11100	2.82827	1	0.816092	62.4061
13	ENSSSCG00000028137		216759345	216764050	protein_coding	1	GOTERM_BP_FAT	GO:0060080~regulation of inhibitory postsynaptic membrane potential	2	1.15607	0.0605875	ENSG00000171189, ENSG00000196338	116	6	11100	31.8966	1	0.812635	62.9548
13	ENSSSCG00000029627		216898157	216908948	protein_coding	1	GOTERM_BP_FAT	GO:0051150~regulation of smooth muscle cell differentiation	2	1.15607	0.0605875	ENSG00000159200, ENSG00000184481	116	6	11100	31.8966	1	0.812635	62.9548
13	ENSSSCG00000025525		216919296	216928632	protein_coding	1	GOTERM_BP_FAT	GO:0060343~trabecula formation	2	1.15607	0.0605875	ENSG00000087245, ENSG00000154734	116	6	11100	31.8966	1	0.812635	62.9548
13	ENSSSCG00000012031	CLDN17	204119207	204119884	protein_coding	-1	GOTERM_BP_FAT	GO:0021700~developmental maturation	4	2.31214	0.0648505	ENSG00000087245, ENSG00000142192, ENSG00000102383, ENSG00000180509	116	89	11100	4.30066	1	0.826513	65.5374
13	ENSSSCG00000012030	CLDN8	204165895	204166572	protein_coding	-1	GOTERM_BP_FAT	GO:0032989~cellular component morphogenesis	8	4.62428	0.0654177	ENSG00000169855, ENSG00000171587, ENSG00000142192, ENSG00000165240, ENSG00000142168, ENSG00000198836, ENSG00000079482, ENSG00000185008	116	343	11100	2.23183	1	0.821718	65.868
13	ENSSSCG00000012018	CHODL	192971795	193001979	protein_coding	1	GOTERM_BP_FAT	GO:0044271~nitrogen compound biosynthetic process	7	4.04624	0.0688097	ENSG00000154723, ENSG00000165240, ENSG00000187527, ENSG00000127249, ENSG00000158578, ENSG00000159131, ENSG00000067842	116	278	11100	2.40945	1	0.830314	67.7839
13	ENSSSCG00000012019	TMPRSS15	192997371	193141213	protein_coding	-1	GOTERM_BP_FAT	GO:0031346~positive regulation of cell projection organization	3	1.7341	0.0700713	ENSG00000169855, ENSG00000185008, ENSG00000156299	116	42	11100	6.83498	1	0.828899	68.4705
13	ENSSSCG00000021804	KRTAP24-1	204233893	204234681	protein_coding	-1	GOTERM_BP_FAT	GO:0019430~removal of superoxide radicals	2	1.15607	0.0703254	ENSG00000165240, ENSG00000142168	116	7	11100	27.3399	1	0.823046	68.6071
13	ENSSSCG00000028321	KRTAP26-1	204269943	204270494	protein_coding	-1	GOTERM_BP_FAT	GO:0000904~cell morphogenesis involved in differentiation	6	3.46821	0.0714354	ENSG00000169855, ENSG00000171587, ENSG00000142192, ENSG00000142168, ENSG00000079482, ENSG00000185008	116	214	11100	2.68289	1	0.821135	69.1973
13	ENSSSCG00000029297	KRTAP27-1	204291475	204292104	protein_coding	-1	GOTERM_BP_FAT	GO:0016337~cell-cell adhesion	6	3.46821	0.0714354	ENSG00000169855, ENSG00000156284, ENSG00000156886, ENSG00000156282, ENSG00000185008, ENSG00000147065	116	214	11100	2.68289	1	0.821135	69.1973
13	ENSSSCG00000028843		204658110	204658265	protein_coding	1	GOTERM_BP_FAT	GO:0048858~cell projection morphogenesis	6	3.46821	0.0725593	ENSG00000169855, ENSG00000171587, ENSG00000142192, ENSG00000165240, ENSG00000079482, ENSG00000185008	116	215	11100	2.67041	1	0.819355	69.7844
13	ENSSSCG00000021087	KRTAP8-1	204836039	204836218	protein_coding	-1	GOTERM_BP_FAT	GO:0030003~cellular cation homeostasis	6	3.46821	0.0736931	ENSG00000142192, ENSG00000165240, ENSG00000142168, ENSG00000131269, ENSG00000158578, ENSG00000173198	116	216	11100	2.65805	1	0.817683	70.366
13	ENSSSCG00000027655	KRTAP7-1	204856332	204856589	protein_coding	-1	GOTERM_BP_FAT	GO:0007411~axon guidance	4	2.31214	0.0794389	ENSG00000169855, ENSG00000142192, ENSG00000079482, ENSG00000185008	116	97	11100	3.94597	1	0.835034	73.1555
13	ENSSSCG00000012034	TIAM1	205172409	205307822	protein_coding	-1	GOTERM_BP_FAT	GO:0006878~cellular copper ion homeostasis	2	1.15607	0.0799632	ENSG00000142192, ENSG00000165240	116	8	11100	23.9224	1	0.830921	73.3974
13	ENSSSCG00000021355	SOD1	205620986	205629933	protein_coding	1	GOTERM_BP_FAT	GO:0031175~neuron projection development	6	3.46821	0.0855615	ENSG00000169855, ENSG00000171587, ENSG00000142192, ENSG00000165240, ENSG00000079482, ENSG00000185008	116	226	11100	2.54043	1	0.845784	75.856
13	ENSSSCG00000012021		199001550	199018936	protein_coding	-1	GOTERM_BP_FAT	GO:0048878~chemical homeostasis	9	5.20231	0.0861988	ENSG00000142192, ENSG00000165240, ENSG00000171189, ENSG00000142168, ENSG00000131269, ENSG00000196338, ENSG00000158578, ENSG00000173198, ENSG00000180509	116	440	11100	1.95729	1	0.842295	76.1219
13	ENSSSCG00000021023	SCAF4	205632459	205690752	protein_coding	-1	GOTERM_BP_FAT	GO:0048666~neuron development	7	4.04624	0.0869647	ENSG00000169855, ENSG00000171587, ENSG00000142192, ENSG00000165240, ENSG00000142168, ENSG00000079482, ENSG00000185008	116	296	11100	2.26293	1	0.839323	76.4379
13	ENSSSCG00000023028	JAM2	199115876	199168012	protein_coding	1	GOTERM_BP_FAT	GO:0018196~peptidyl-asparagine modification	2	1.15607	0.089502	ENSG00000198856, ENSG00000102158	116	9	11100	21.2644	1	0.842564	77.4571
13	ENSSSCG00000026479		199138367	199141529	protein_coding	-1	GOTERM_BP_FAT	GO:0018279~protein amino acid N-linked glycosylation via asparagine	2	1.15607	0.089502	ENSG00000198856, ENSG00000102158	116	9	11100	21.2644	1	0.842564	77.4571
13	ENSSSCG00000022586	ATP5J	199152403	199157934	protein_coding	-1	GOTERM_BP_FAT	GO:0000303~response to superoxide	2	1.15607	0.089502	ENSG00000165240, ENSG00000142168	116	9	11100	21.2644	1	0.842564	77.4571
13	ENSSSCG00000022632		199172158	199173832	protein_coding	1	GOTERM_BP_FAT	GO:0055070~copper ion homeostasis	2	1.15607	0.089502	ENSG00000142192, ENSG00000165240	116	9	11100	21.2644	1	0.842564	77.4571
13	ENSSSCG00000012022	APP	199291020	199568630	protein_coding	-1	GOTERM_BP_FAT	GO:0006811~ion transport	12	6.93642	0.0909651	ENSG00000154723, ENSG00000165240, ENSG00000151418, ENSG00000187527, ENSG00000127249, ENSG00000171189, ENSG00000159197, ENSG00000173198, ENSG00000140675, ENSG00000089472, ENSG00000180509, ENSG00000067842	116	676	11100	1.69863	1	0.842073	78.0258
13	ENSSSCG00000012026	ADAMTS1	200127201	200135726	protein_coding	-1	GOTERM_BP_FAT	GO:0050863~regulation of T cell activation	4	2.31214	0.0973911	ENSG00000155659, ENSG00000142168, ENSG00000147168, ENSG00000160223	116	106	11100	3.61093	1	0.857277	80.3681
13	ENSSSCG00000012040	OLIG1	206713880	206714722	protein_coding	-1	GOTERM_BP_FAT	GO:0030182~neuron differentiation	8	4.62428	0.0974204	ENSG00000169855, ENSG00000171587, ENSG00000142192, ENSG00000165240, ENSG00000142168, ENSG00000079482, ENSG00000185008, ENSG00000184221	116	378	11100	2.02518	1	0.852318	80.3782
13	ENSSSCG00000028192	DNAJC28	206922280	206923693	protein_coding	-1	GOTERM_BP_FAT	GO:0050769~positive regulation of neurogenesis	3	1.7341	0.0978103	ENSG00000169855, ENSG00000185008, ENSG00000156299	116	51	11100	5.6288	1	0.848483	80.5124
13	ENSSSCG00000029488	ADAMTS1	200326440	200332110	protein_coding	1	GOTERM_BP_FAT	GO:0000305~response to oxygen radical	2	1.15607	0.0989428	ENSG00000165240, ENSG00000142168	116	10	11100	19.1379	1	0.846975	80.8975
13	ENSSSCG00000030677	GART	206941045	206971927	protein_coding	-1	GOTERM_BP_FAT	GO:0060081~membrane hyperpolarization	2	1.15607	0.0989428	ENSG00000171189, ENSG00000196338	116	10	11100	19.1379	1	0.846975	80.8975
13	ENSSSCG00000012027	ADAMTS5	200405037	200449758	protein_coding	-1	GOTERM_BP_FAT	GO:0000902~cell morphogenesis	7	4.04624	0.0992456	ENSG00000169855, ENSG00000171587, ENSG00000142192, ENSG00000165240, ENSG00000142168, ENSG00000079482, ENSG00000185008	116	307	11100	2.18185	1	0.842966	80.9992
13	ENSSSCG00000029623		202514907	202515311	protein_coding	1	GOTERM_CC_FAT	GO:0043005~neuron projection	10	5.78035	0.00468087	ENSG00000169855, ENSG00000142192, ENSG00000165240, ENSG00000171189, ENSG00000142168, ENSG00000169083, ENSG00000198836, ENSG00000079482, ENSG00000185008, ENSG00000136928	112	301	10452	3.10038	0.640423	0.640423	5.78934
13	ENSSSCG00000024051		202522698	202524332	protein_coding	-1	GOTERM_CC_FAT	GO:0044455~mitochondrial membrane part	6	3.46821	0.00556172	ENSG00000154723, ENSG00000170516, ENSG00000156885, ENSG00000198836, ENSG00000131174, ENSG00000160194	112	107	10452	5.23298	0.703539	0.455518	6.84362
13	ENSSSCG00000026046		202557997	202562029	protein_coding	1	GOTERM_CC_FAT	GO:0005743~mitochondrial inner membrane	9	5.20231	0.00685065	ENSG00000169188, ENSG00000154723, ENSG00000170516, ENSG00000156885, ENSG00000131269, ENSG00000198836, ENSG00000158578, ENSG00000131174, ENSG00000160194	112	263	10452	3.19351	0.776553	0.393182	8.36676
13	ENSSSCG00000030528	LTN1	202598695	202660919	protein_coding	-1	GOTERM_CC_FAT	GO:0019866~organelle inner membrane	9	5.20231	0.0104314	ENSG00000169188, ENSG00000154723, ENSG00000170516, ENSG00000156885, ENSG00000131269, ENSG00000198836, ENSG00000158578, ENSG00000131174, ENSG00000160194	112	283	10452	2.96782	0.898327	0.435322	12.4786
13	ENSSSCG00000023674	SON	206972801	207003183	protein_coding	1	GOTERM_CC_FAT	GO:0042995~cell projection	14	8.09249	0.0119606	ENSG00000169855, ENSG00000154646, ENSG00000169083, ENSG00000142168, ENSG00000185008, ENSG00000140675, ENSG00000147065, ENSG00000142192, ENSG00000165240, ENSG00000171189, ENSG00000102302, ENSG00000198836, ENSG00000079482, ENSG00000136928	112	607	10452	2.15239	0.927424	0.408223	14.1822
13	ENSSSCG00000027089	DONSON	207005112	207014612	protein_coding	-1	GOTERM_CC_FAT	GO:0005829~cytosol	21	12.1387	0.0218847	ENSG00000158571, ENSG00000142178, ENSG00000172062, ENSG00000205758, ENSG00000205571, ENSG00000144713, ENSG00000142168, ENSG00000156273, ENSG00000160191, ENSG00000184481, ENSG00000109475, ENSG00000157617, ENSG00000165240, ENSG00000160207, ENSG00000114480, ENSG00000151418, ENSG00000160208, ENSG00000102302, ENSG00000147202, ENSG00000142182, ENSG00000156299, ENSG00000156261	112	1175	10452	1.66787	0.991964	0.552454	24.5167
13	ENSSSCG00000026581	RWDD2B	202665421	202671448	protein_coding	-1	GOTERM_CC_FAT	GO:0005746~mitochondrial respiratory chain	4	2.31214	0.0225262	ENSG00000170516, ENSG00000156885, ENSG00000131174, ENSG00000160194	112	57	10452	6.54887	0.993035	0.508135	25.1435
13	ENSSSCG00000027594	USP16	202679047	202709145	protein_coding	1	GOTERM_CC_FAT	GO:0031966~mitochondrial membrane	9	5.20231	0.0294356	ENSG00000169188, ENSG00000154723, ENSG00000170516, ENSG00000156885, ENSG00000131269, ENSG00000198836, ENSG00000158578, ENSG00000131174, ENSG00000160194	112	343	10452	2.44867	0.998516	0.55699	31.5977
13	ENSSSCG00000028377	CRYZL1	207015271	207077231	protein_coding	-1	GOTERM_CC_FAT	GO:0070469~respiratory chain	4	2.31214	0.0341933	ENSG00000170516, ENSG00000156885, ENSG00000131174, ENSG00000160194	112	67	10452	5.57143	0.999492	0.569466	35.7395
13	ENSSSCG00000026761	CCT8	202710194	202726027	protein_coding	-1	GOTERM_CC_FAT	GO:0005740~mitochondrial envelope	9	5.20231	0.0402579	ENSG00000169188, ENSG00000154723, ENSG00000170516, ENSG00000156885, ENSG00000131269, ENSG00000198836, ENSG00000158578, ENSG00000131174, ENSG00000160194	112	365	10452	2.30108	0.999871	0.59171	40.684
13	ENSSSCG00000012045	KCNE2	207808671	207809042	protein_coding	1	GOTERM_CC_FAT	GO:0044429~mitochondrial part	11	6.35838	0.048855	ENSG00000169188, ENSG00000154723, ENSG00000170516, ENSG00000156885, ENSG00000142168, ENSG00000131269, ENSG00000198836, ENSG00000158578, ENSG00000154719, ENSG00000131174, ENSG00000160194	112	519	10452	1.97791	0.999982	0.629413	47.0944
13	ENSSSCG00000012046	SMIM11	207814283	207826833	protein_coding	1	GOTERM_CC_FAT	GO:0044463~cell projection part	6	3.46821	0.0575411	ENSG00000169855, ENSG00000142192, ENSG00000142168, ENSG00000079482, ENSG00000185008, ENSG00000140675	112	196	10452	2.85678	0.999998	0.659251	52.9177
13	ENSSSCG00000012047	C21orf140	207836763	207837512	protein_coding	-1	GOTERM_CC_FAT	GO:0030425~dendrite	5	2.89017	0.0617297	ENSG00000171189, ENSG00000142168, ENSG00000169083, ENSG00000198836, ENSG00000079482	112	140	10452	3.33291	0.999999	0.656472	55.5092
13	ENSSSCG00000012049		207880013	207880402	protein_coding	-1	GOTERM_CC_FAT	GO:0030673~axolemma	2	1.15607	0.0620663	ENSG00000169855, ENSG00000185008	112	6	10452	31.1071	0.999999	0.631294	55.7117
13	ENSSSCG00000012050	RCAN1	207934802	207945091	protein_coding	-1	GOTERM_CC_FAT	GO:0030424~axon	5	2.89017	0.065686	ENSG00000169855, ENSG00000142192, ENSG00000169083, ENSG00000079482, ENSG00000185008	112	143	10452	3.26299	1	0.627469	57.8358
13	ENSSSCG00000012032		203723967	203724125	pseudogene	-1	GOTERM_CC_FAT	GO:0005882~intermediate filament	4	2.31214	0.0762308	ENSG00000188694, ENSG00000183640, ENSG00000206107, ENSG00000197683	112	93	10452	4.01382	1	0.660529	63.5004
13	ENSSSCG00000012039		206662841	206664067	pseudogene	1	GOTERM_CC_FAT	GO:0032589~neuron projection membrane	2	1.15607	0.0818945	ENSG00000169855, ENSG00000185008	112	8	10452	23.3304	1	0.665688	66.2449
13	ENSSSCG00000020751	U6	194369194	194369300	snRNA	1	GOTERM_CC_FAT	GO:0045111~intermediate filament cytoskeleton	4	2.31214	0.0820841	ENSG00000188694, ENSG00000183640, ENSG00000206107, ENSG00000197683	112	96	10452	3.88839	1	0.645594	66.3334
13	ENSSSCG00000023224	U6	205763642	205763735	snRNA	1	GOTERM_CC_FAT	GO:0008250~oligosaccharyltransferase complex	2	1.15607	0.0916522	ENSG00000198856, ENSG00000102158	112	9	10452	20.7381	1	0.668107	70.5316
13	ENSSSCG00000020114	SNORD63	38672836	38672908	snoRNA	-1	GOTERM_MF_FAT	GO:0016820~hydrolase activity, acting on acid anhydrides, catalyzing transmembrane movement of substances	7	4.04624	0.000839721	ENSG00000154723, ENSG00000165240, ENSG00000151418, ENSG00000187527, ENSG00000127249, ENSG00000131269, ENSG00000067842	124	96	10637	6.25496	0.244023	0.244023	1.13396
13	ENSSSCG00000026439		201245482	201245566	miRNA	-1	GOTERM_MF_FAT	GO:0042626~ATPase activity, coupled to transmembrane movement of substances	6	3.46821	0.00460983	ENSG00000154723, ENSG00000165240, ENSG00000187527, ENSG00000127249, ENSG00000131269, ENSG00000067842	124	94	10637	5.47546	0.785324	0.536668	6.07988
13	ENSSSCG00000018241	U6	194314383	194314488	snRNA	-1	GOTERM_MF_FAT	GO:0043492~ATPase activity, coupled to movement of substances	6	3.46821	0.00482179	ENSG00000154723, ENSG00000165240, ENSG00000187527, ENSG00000127249, ENSG00000131269, ENSG00000067842	124	95	10637	5.41783	0.80002	0.415216	6.35102
13	ENSSSCG00000019480	U6	200739347	200739451	snRNA	-1	GOTERM_MF_FAT	GO:0042625~ATPase activity, coupled to transmembrane movement of ions	5	2.89017	0.00599613	ENSG00000154723, ENSG00000165240, ENSG00000187527, ENSG00000127249, ENSG00000067842	124	63	10637	6.80812	0.865032	0.393882	7.84015
13	ENSSSCG00000020922		201175948	201176032	miRNA	-1	GOTERM_MF_FAT	GO:0015399~primary active transmembrane transporter activity	6	3.46821	0.00705112	ENSG00000154723, ENSG00000165240, ENSG00000187527, ENSG00000127249, ENSG00000131269, ENSG00000067842	124	104	10637	4.94898	0.905234	0.37579	9.1592
13	ENSSSCG00000018244	SNORA29	199016092	199016230	snoRNA	-1	GOTERM_MF_FAT	GO:0015405~P-P-bond-hydrolysis-driven transmembrane transporter activity	6	3.46821	0.00705112	ENSG00000154723, ENSG00000165240, ENSG00000187527, ENSG00000127249, ENSG00000131269, ENSG00000067842	124	104	10637	4.94898	0.905234	0.37579	9.1592
13	ENSSSCG00000027940	SNORA70	216650134	216650250	snoRNA	-1	GOTERM_MF_FAT	GO:0015662~ATPase activity, coupled to transmembrane movement of ions, phosphorylative mechanism	4	2.31214	0.0169049	ENSG00000165240, ENSG00000187527, ENSG00000127249, ENSG00000067842	124	47	10637	7.30062	0.996578	0.611803	20.6621
13	ENSSSCG00000019154	ssc-mir-155	199063344	199063424	miRNA	-1	GOTERM_MF_FAT	GO:0022890~inorganic cation transmembrane transporter activity	6	3.46821	0.0195084	ENSG00000154723, ENSG00000165240, ENSG00000170516, ENSG00000156885, ENSG00000131174, ENSG00000067842	124	134	10637	3.841	0.998585	0.608282	23.4674
13	ENSSSCG00000019793	U6	199351615	199351720	snRNA	-1	GOTERM_MF_FAT	GO:0004843~ubiquitin-specific protease activity	3	1.7341	0.0263457	ENSG00000102226, ENSG00000156256, ENSG00000155313	124	22	10637	11.6976	0.999862	0.670884	30.4033
13	ENSSSCG00000028013	U6	186755478	186755584	snRNA	1	GOTERM_MF_FAT	GO:0016675~oxidoreductase activity, acting on heme group of donors	3	1.7341	0.0286399	ENSG00000170516, ENSG00000156885, ENSG00000131174	124	23	10637	11.189	0.999937	0.658753	32.5968
13	ENSSSCG00000027803		201138426	201138499	miRNA	-1	GOTERM_MF_FAT	GO:0015002~heme-copper terminal oxidase activity	3	1.7341	0.0286399	ENSG00000170516, ENSG00000156885, ENSG00000131174	124	23	10637	11.189	0.999937	0.658753	32.5968
13	ENSSSCG00000018726	SNORA51	200582545	200582680	snoRNA	-1	GOTERM_MF_FAT	GO:0019783~small conjugating protein-specific protease activity	3	1.7341	0.0286399	ENSG00000102226, ENSG00000156256, ENSG00000155313	124	23	10637	11.189	0.999937	0.658753	32.5968
13	ENSSSCG00000024159	U6	199713646	199713752	snRNA	-1	GOTERM_MF_FAT	GO:0045028~purinergic nucleotide receptor activity, G-protein coupled	3	1.7341	0.0286399	ENSG00000147145, ENSG00000147138, ENSG00000078589	124	23	10637	11.189	0.999937	0.658753	32.5968
14	ENSSSCG00000010676		140327293	140346983	protein_coding	1	GOTERM_MF_FAT	GO:0001608~nucleotide receptor activity, G-protein coupled	3	1.7341	0.0286399	ENSG00000147145, ENSG00000147138, ENSG00000078589	124	23	10637	11.189	0.999937	0.658753	32.5968
15	ENSSSCG00000016233	PN-1	139183910	139249592	protein_coding	-1	GOTERM_MF_FAT	GO:0004129~cytochrome-c oxidase activity	3	1.7341	0.0286399	ENSG00000170516, ENSG00000156885, ENSG00000131174	124	23	10637	11.189	0.999937	0.658753	32.5968
15	ENSSSCG00000015726	CNTNAP5	31248003	31803163	protein_coding	-1	GOTERM_MF_FAT	GO:0016676~oxidoreductase activity, acting on heme group of donors, oxygen as acceptor	3	1.7341	0.0286399	ENSG00000170516, ENSG00000156885, ENSG00000131174	124	23	10637	11.189	0.999937	0.658753	32.5968
16	ENSSSCG00000024721	LSM11	71438516	71452568	protein_coding	-1	GOTERM_MF_FAT	GO:0005507~copper ion binding	4	2.31214	0.0334178	ENSG00000142192, ENSG00000165240, ENSG00000142168, ENSG00000089472	124	61	10637	5.62507	0.999988	0.677558	36.9611
16	ENSSSCG00000017049	THG1L	71456115	71462616	protein_coding	-1	GOTERM_MF_FAT	GO:0001614~purinergic nucleotide receptor activity	3	1.7341	0.0467411	ENSG00000147145, ENSG00000147138, ENSG00000078589	124	30	10637	8.57823	1	0.765222	47.7872
[truncated: 213 more rows]

[truncated: 2 more sheets: Table K, Table L]
